# Supplementary material
Source: Elsevier journal article supplement (https://univ-rennes.hal.science/hal-01381135v1/file/mmc3.zip)
Supplement: mmc3 [file mmc3.zip]

Archive with 2 entries (2 files):
- checkcif_7-PF6.pdf
- 7-PF6.cif
