# Supplementary material
Source: Elsevier journal article supplement (https://univ-rennes.hal.science/hal-01381135v1/file/mmc3.zip)
Supplement: mmc3 [file mmc3.zip › 7-PF6.cif]

 
data_nz01r

# start Validation Reply Form
_vrf_PLAT234_nz01r
;
PROBLEM: Large Hirshfeld Difference P200   --  F201    ..       0.37 Ang.  
RESPONSE: This refers to a PF6 anion in the structure that shows
large thermal displacement/disorder. Splitting these atoms did not 
produce a model that could be refined.
;
_vrf_PLAT601_nz01r
;
PROBLEM: Structure Contains Solvent Accessible VOIDS of .        231 Ang3  
RESPONSE: The structure crystallises as an acetone solvate with
significant numbers of solvate molecules identified in the structure.
The remaining voids presumably contain further disordered acetone 
solvate molecules which could not be modelled.
;
# end Validation Reply Form
 
_audit_creation_method            SHELXL-2014/6
_chemical_name_systematic         ?
_chemical_name_common             ?
_chemical_melting_point           ?
_chemical_formula_moiety          ?
_chemical_formula_sum
 'C167 H160 Cu3 F6 O4 P11 Ru2' 
_chemical_formula_weight          3078.37

loop_
 _atom_type_symbol
 _atom_type_description
 _atom_type_scat_dispersion_real
 _atom_type_scat_dispersion_imag
 _atom_type_scat_source
 'C'  'C'   0.0033   0.0016
 'International Tables Vol C Tables 4.2.6.8 and 6.1.1.4'
 'H'  'H'   0.0000   0.0000
 'International Tables Vol C Tables 4.2.6.8 and 6.1.1.4'
 'F'  'F'   0.0171   0.0103
 'International Tables Vol C Tables 4.2.6.8 and 6.1.1.4'
 'P'  'P'   0.1023   0.0942
 'International Tables Vol C Tables 4.2.6.8 and 6.1.1.4'
 'Cu'  'Cu'   0.3201   1.2651
 'International Tables Vol C Tables 4.2.6.8 and 6.1.1.4'
 'Ru'  'Ru'  -1.2594   0.8363
 'International Tables Vol C Tables 4.2.6.8 and 6.1.1.4'
 'O'  'O'   0.0106   0.0060
 'International Tables Vol C Tables 4.2.6.8 and 6.1.1.4'
 
_space_group_crystal_system       monoclinic
_space_group_IT_number            14
_space_group_name_H-M_alt         'P 21/n'
_space_group_name_Hall            '-P 2yn'
 
_shelx_space_group_comment
;
The symmetry employed for this shelxl refinement is uniquely defined
by the following loop, which should always be used as a source of
symmetry information in preference to the above space-group names.
They are only intended as comments.
;
 
loop_
 _space_group_symop_operation_xyz
 'x, y, z'
 '-x+1/2, y+1/2, -z+1/2'
 '-x, -y, -z'
 'x-1/2, -y-1/2, z-1/2'
 
_cell_length_a                    15.4381(4)
_cell_length_b                    33.2292(13)
_cell_length_c                    31.2137(9)
_cell_angle_alpha                 90
_cell_angle_beta                  93.349(2)
_cell_angle_gamma                 90
_cell_volume                      15985.1(9)
_cell_formula_units_Z             4
_cell_measurement_temperature     150(2)
_cell_measurement_reflns_used   22684
_cell_measurement_theta_min     2.5009
_cell_measurement_theta_max     28.1780
 
_exptl_crystal_description        block 
_exptl_crystal_colour             yellow
_exptl_crystal_density_meas       ?
_exptl_crystal_density_method     ?
_exptl_crystal_density_diffrn     1.279          
_exptl_crystal_F_000              6352
_exptl_transmission_factor_min    ?
_exptl_transmission_factor_max    ?
_exptl_crystal_size_max           0.200
_exptl_crystal_size_mid           0.150
_exptl_crystal_size_min           0.080
_exptl_absorpt_coefficient_mu     0.745
_shelx_estimated_absorpt_T_min    0.865
_shelx_estimated_absorpt_T_max    0.943
_exptl_absorpt_correction_T_min                   0.87665
_exptl_absorpt_correction_T_max                   1.00000
_exptl_absorpt_correction_type            'multi-scan'
_exptl_absorpt_process_details
;
CrysAlisPro, Agilent Technologies,
Version 1.171.35.11 (release 16-05-2011 CrysAlis171 .NET)
(compiled May 16 2011,17:55:39)
Empirical absorption correction using spherical harmonics,
 implemented in SCALE3 ABSPACK scaling algorithm.
;
_exptl_absorpt_special_details    ?
_diffrn_ambient_temperature       150(2)
_diffrn_radiation_wavelength      0.71073
_diffrn_radiation_type            MoK\a
_diffrn_radiation_source 'Enhance (Mo) X-ray Source'
_diffrn_radiation_monochromator 'graphite'
_diffrn_measurement_device_type 'Xcalibur, Eos'
_diffrn_measurement_details
;
#__ type_ start__ end____ width___ exp.time_
  1 omega   61.00   94.00   1.0000  130.0000
omega____ theta____ kappa____ phi______ frames
    -       16.1484  179.0000   30.0000 33

#__ type_ start__ end____ width___ exp.time_
  2 omega  -90.00   24.00   1.0000  130.0000
omega____ theta____ kappa____ phi______ frames
    -      -17.0078    0.0000 -180.0000 114

#__ type_ start__ end____ width___ exp.time_
  3 omega   -7.00   56.00   1.0000  130.0000
omega____ theta____ kappa____ phi______ frames
    -      -17.0078   37.0000    0.0000 63

#__ type_ start__ end____ width___ exp.time_
  4 omega  -15.00   87.00   1.0000  130.0000
omega____ theta____ kappa____ phi______ frames
    -       16.1484   77.0000   30.0000 102

#__ type_ start__ end____ width___ exp.time_
  5 omega  -11.00   89.00   1.0000  130.0000
omega____ theta____ kappa____ phi______ frames
    -       16.1484   37.0000 -180.0000 100

#__ type_ start__ end____ width___ exp.time_
  6 omega  -95.00  -32.00   1.0000  130.0000
omega____ theta____ kappa____ phi______ frames
    -      -17.0078  179.0000  120.0000 63

;
_diffrn_measurement_method '\w scans' 
_diffrn_detector_area_resol_mean  16.1695 
_diffrn_reflns_number             143304
_diffrn_reflns_av_unetI/netI      0.0894
_diffrn_reflns_av_R_equivalents   0.0759
_diffrn_reflns_limit_h_min        -19
_diffrn_reflns_limit_h_max        19
_diffrn_reflns_limit_k_min        -40
_diffrn_reflns_limit_k_max        43
_diffrn_reflns_limit_l_min        -40
_diffrn_reflns_limit_l_max        41
_diffrn_reflns_theta_min          2.504
_diffrn_reflns_theta_max          28.430
_diffrn_reflns_theta_full         26.000
_diffrn_measured_fraction_theta_max   0.856
_diffrn_measured_fraction_theta_full  0.991
_diffrn_reflns_Laue_measured_fraction_max    0.856
_diffrn_reflns_Laue_measured_fraction_full   0.991
_diffrn_reflns_point_group_measured_fraction_max   0.856
_diffrn_reflns_point_group_measured_fraction_full  0.991
_reflns_number_total              34429
_reflns_number_gt                 22179
_reflns_threshold_expression      'I > 2\s(I)'
_reflns_Friedel_coverage          0.000
_reflns_Friedel_fraction_max      .
_reflns_Friedel_fraction_full     .
 
_reflns_special_details
;
 Reflections were merged by SHELXL according to the crystal
 class for the calculation of statistics and refinement.
 
 _reflns_Friedel_fraction is defined as the number of unique
 Friedel pairs measured divided by the number that would be
 possible theoretically, ignoring centric projections and
 systematic absences.
;
 
_computing_data_collection
;
CrysAlisPro, Agilent Technologies,
Version 1.171.35.11 (release 16-05-2011 CrysAlis171 .NET)
(compiled May 16 2011,17:55:39)
;
_computing_cell_refinement
;
CrysAlisPro, Agilent Technologies,
Version 1.171.35.11 (release 16-05-2011 CrysAlis171 .NET)
(compiled May 16 2011,17:55:39)
;
_computing_data_reduction
;
CrysAlisPro, Agilent Technologies,
Version 1.171.35.11 (release 16-05-2011 CrysAlis171 .NET)
(compiled May 16 2011,17:55:39)
;
_computing_structure_solution     'SHELXS-97 (Sheldrick, 1990)'
_computing_structure_refinement 'SHELXL-2014/6 (Sheldrick, 2014)'
_computing_molecular_graphics     ?
_computing_publication_material   ?
_refine_special_details           ?
_refine_ls_structure_factor_coef  Fsqd
_refine_ls_matrix_type            full
_refine_ls_weighting_scheme       calc
_refine_ls_weighting_details
'w=1/[\s^2^(Fo^2^)+(0.0792P)^2^+81.0434P] where P=(Fo^2^+2Fc^2^)/3'
_atom_sites_solution_primary      ?
_atom_sites_solution_secondary    ?
_atom_sites_solution_hydrogens    geom
_refine_ls_hydrogen_treatment     constr
_refine_ls_extinction_method      none
_refine_ls_extinction_coef        .
_refine_ls_number_reflns          34429
_refine_ls_number_parameters      1719
_refine_ls_number_restraints      20
_refine_ls_R_factor_all           0.1313
_refine_ls_R_factor_gt            0.0768
_refine_ls_wR_factor_ref          0.2185
_refine_ls_wR_factor_gt           0.1873
_refine_ls_goodness_of_fit_ref    1.076
_refine_ls_restrained_S_all       1.077
_refine_ls_shift/su_max           0.001
_refine_ls_shift/su_mean          0.000
 
loop_
 _atom_site_label
 _atom_site_type_symbol
 _atom_site_fract_x
 _atom_site_fract_y
 _atom_site_fract_z
 _atom_site_U_iso_or_equiv
 _atom_site_adp_type
 _atom_site_occupancy
 _atom_site_site_symmetry_order  
 _atom_site_calc_flag
 _atom_site_refinement_flags_posn
 _atom_site_refinement_flags_adp
 _atom_site_refinement_flags_occupancy
 _atom_site_disorder_assembly
 _atom_site_disorder_group
Ru1 Ru 0.38784(3) 0.21028(2) 0.90158(2) 0.02438(12) Uani 1 1 d . . . . .
Ru2 Ru -0.25162(3) -0.06755(2) 0.70391(2) 0.02669(13) Uani 1 1 d . . . . .
Cu3 Cu -0.00128(4) 0.09273(2) 0.81676(2) 0.02289(16) Uani 1 1 d . . . . .
Cu4 Cu 0.07261(4) 0.09902(2) 0.74761(2) 0.02432(17) Uani 1 1 d . . . . .
Cu5 Cu 0.12288(4) 0.04103(2) 0.80006(2) 0.02350(16) Uani 1 1 d . . . . .
C1 C 0.3027(4) 0.17521(19) 0.8681(2) 0.0291(14) Uani 1 1 d . . . . .
C2 C 0.2499(4) 0.15351(18) 0.8481(2) 0.0265(13) Uani 1 1 d . . . . .
C3 C 0.1912(4) 0.12676(18) 0.82860(19) 0.0248(13) Uani 1 1 d . . . . .
C4 C 0.1407(4) 0.10273(18) 0.81229(19) 0.0239(13) Uani 1 1 d . . . . .
C5 C -0.0098(4) 0.05246(18) 0.7636(2) 0.0253(13) Uani 1 1 d . . . . .
P6 P 0.36858(10) 0.16898(5) 0.95746(5) 0.0266(3) Uani 1 1 d . . . . .
C6 C -0.0485(4) 0.02170(18) 0.75297(18) 0.0242(13) Uani 1 1 d . . . . .
P7 P 0.26773(10) 0.23812(5) 0.92631(5) 0.0266(3) Uani 1 1 d . . . . .
C7 C -0.0972(4) -0.01119(18) 0.7409(2) 0.0267(13) Uani 1 1 d . . . . .
P8 P -0.07055(10) 0.15303(5) 0.81356(5) 0.0248(3) Uani 1 1 d . . . . .
C8 C -0.1491(4) -0.03695(18) 0.7287(2) 0.0272(13) Uani 1 1 d . . . . .
P9 P 0.02162(10) 0.16120(5) 0.73248(5) 0.0258(3) Uani 1 1 d . . . . .
P10 P 0.14128(10) 0.07854(5) 0.68962(5) 0.0286(4) Uani 1 1 d . . . . .
P11 P 0.21084(10) 0.01429(5) 0.75039(5) 0.0262(3) Uani 1 1 d . . . . .
P12 P 0.09397(9) -0.00084(5) 0.85531(5) 0.0246(3) Uani 1 1 d . . . . .
P13 P -0.04316(9) 0.05919(5) 0.87530(5) 0.0231(3) Uani 1 1 d . . . . .
P14 P -0.15878(11) -0.11096(5) 0.67649(6) 0.0304(4) Uani 1 1 d . . . . .
P15 P -0.23805(10) -0.11049(5) 0.76069(5) 0.0279(4) Uani 1 1 d . . . . .
C16 C 0.5330(4) 0.2172(2) 0.9093(2) 0.0327(15) Uani 1 1 d . . . . .
C17 C 0.5106(4) 0.1964(2) 0.8701(2) 0.0370(16) Uani 1 1 d . . . . .
C18 C 0.4595(4) 0.2218(2) 0.8423(2) 0.0408(18) Uani 1 1 d . . . . .
C19 C 0.4496(4) 0.2588(2) 0.8642(2) 0.0400(18) Uani 1 1 d . . . . .
C20 C 0.4966(4) 0.2556(2) 0.9060(2) 0.0350(15) Uani 1 1 d . . . . .
C21 C 0.5978(5) 0.2030(3) 0.9444(3) 0.060(3) Uani 1 1 d . . . . .
H21A H 0.6566 0.2049 0.9343 0.091 Uiso 1 1 calc R U . . .
H21B H 0.5853 0.1750 0.9516 0.091 Uiso 1 1 calc R U . . .
H21C H 0.5933 0.2199 0.9699 0.091 Uiso 1 1 calc R U . . .
C22 C 0.5452(5) 0.1561(2) 0.8587(4) 0.069(3) Uani 1 1 d . . . . .
H22A H 0.5164 0.1470 0.8316 0.103 Uiso 1 1 calc R U . . .
H22B H 0.5341 0.1369 0.8815 0.103 Uiso 1 1 calc R U . . .
H22C H 0.6078 0.1581 0.8555 0.103 Uiso 1 1 calc R U . . .
C23 C 0.4273(6) 0.2128(4) 0.7966(3) 0.086(4) Uani 1 1 d . . . . .
H23A H 0.4758 0.2146 0.7777 0.128 Uiso 1 1 calc R U . . .
H23B H 0.3825 0.2323 0.7873 0.128 Uiso 1 1 calc R U . . .
H23C H 0.4028 0.1855 0.7950 0.128 Uiso 1 1 calc R U . . .
C24 C 0.4094(5) 0.2961(3) 0.8452(3) 0.072(3) Uani 1 1 d . . . . .
H24A H 0.4148 0.3180 0.8663 0.107 Uiso 1 1 calc R U . . .
H24B H 0.3478 0.2912 0.8375 0.107 Uiso 1 1 calc R U . . .
H24C H 0.4391 0.3037 0.8195 0.107 Uiso 1 1 calc R U . . .
C25 C 0.5184(6) 0.2895(2) 0.9374(3) 0.063(2) Uani 1 1 d . . . . .
H25A H 0.4852 0.3135 0.9287 0.094 Uiso 1 1 calc R U . . .
H25B H 0.5037 0.2813 0.9663 0.094 Uiso 1 1 calc R U . . .
H25C H 0.5806 0.2954 0.9375 0.094 Uiso 1 1 calc R U . . .
C26 C 0.2510(4) 0.16081(19) 0.9610(2) 0.0324(15) Uani 1 1 d . . . . .
C27 C 0.1980(4) 0.1983(2) 0.9470(2) 0.0349(15) Uani 1 1 d . . . . .
C28 C 0.4007(4) 0.1846(2) 1.0130(2) 0.0341(15) Uani 1 1 d . . . . .
C29 C 0.3765(5) 0.1633(3) 1.0485(2) 0.050(2) Uani 1 1 d . . . . .
H29 H 0.3471 0.1383 1.0446 0.060 Uiso 1 1 calc R U . . .
C30 C 0.3949(6) 0.1781(3) 1.0904(3) 0.066(3) Uani 1 1 d . . . . .
H30 H 0.3751 0.1637 1.1143 0.079 Uiso 1 1 calc R U . . .
C31 C 0.4409(6) 0.2127(3) 1.0969(3) 0.058(2) Uani 1 1 d . . . . .
H31 H 0.4554 0.2221 1.1251 0.069 Uiso 1 1 calc R U . . .
C32 C 0.4659(5) 0.2336(2) 1.0619(2) 0.0478(19) Uani 1 1 d . . . . .
H32 H 0.4976 0.2579 1.0660 0.057 Uiso 1 1 calc R U . . .
C33 C 0.4457(4) 0.2199(2) 1.0203(2) 0.0379(16) Uani 1 1 d . . . . .
H33 H 0.4633 0.2351 0.9966 0.046 Uiso 1 1 calc R U . . .
C34 C 0.4152(4) 0.11916(19) 0.9553(2) 0.0313(14) Uani 1 1 d . . . . .
C35 C 0.3889(5) 0.0944(2) 0.9209(2) 0.0391(16) Uani 1 1 d . . . . .
H35 H 0.3475 0.1039 0.8996 0.047 Uiso 1 1 calc R U . . .
C36 C 0.4221(5) 0.0566(2) 0.9176(3) 0.051(2) Uani 1 1 d . . . . .
H36 H 0.4024 0.0394 0.8948 0.061 Uiso 1 1 calc R U . . .
C37 C 0.4852(5) 0.0433(2) 0.9481(3) 0.049(2) Uani 1 1 d . . . . .
H37 H 0.5075 0.0168 0.9463 0.059 Uiso 1 1 calc R U . . .
C38 C 0.5154(5) 0.0683(3) 0.9805(3) 0.053(2) Uani 1 1 d . . . . .
H38 H 0.5608 0.0597 1.0003 0.064 Uiso 1 1 calc R U . . .
C39 C 0.4798(5) 0.1057(2) 0.9842(3) 0.0465(19) Uani 1 1 d . . . . .
H39 H 0.4998 0.1228 1.0071 0.056 Uiso 1 1 calc R U . . .
C40 C 0.1919(4) 0.26545(18) 0.8892(2) 0.0290(14) Uani 1 1 d . . . . .
C41 C 0.1330(4) 0.2922(2) 0.9052(2) 0.0379(16) Uani 1 1 d . . . . .
H41 H 0.1300 0.2957 0.9353 0.045 Uiso 1 1 calc R U . . .
C42 C 0.0776(5) 0.3141(2) 0.8764(3) 0.0472(19) Uani 1 1 d . . . . .
H42 H 0.0381 0.3328 0.8874 0.057 Uiso 1 1 calc R U . . .
C43 C 0.0794(5) 0.3091(2) 0.8324(3) 0.0467(19) Uani 1 1 d . . . . .
H43 H 0.0417 0.3243 0.8134 0.056 Uiso 1 1 calc R U . . .
C44 C 0.1362(5) 0.2819(2) 0.8167(2) 0.0417(17) Uani 1 1 d . . . . .
H44 H 0.1377 0.2779 0.7866 0.050 Uiso 1 1 calc R U . . .
C45 C 0.1920(4) 0.26011(19) 0.8448(2) 0.0320(14) Uani 1 1 d . . . . .
H45 H 0.2309 0.2412 0.8335 0.038 Uiso 1 1 calc R U . . .
C46 C 0.2812(4) 0.2747(2) 0.9704(2) 0.0339(15) Uani 1 1 d . . . . .
C47 C 0.3097(5) 0.3121(2) 0.9606(3) 0.052(2) Uani 1 1 d . . . . .
H47 H 0.3190 0.3188 0.9316 0.062 Uiso 1 1 calc R U . . .
C48 C 0.3251(6) 0.3404(3) 0.9926(3) 0.065(3) Uani 1 1 d . . . . .
H48 H 0.3448 0.3666 0.9857 0.078 Uiso 1 1 calc R U . . .
C49 C 0.3117(6) 0.3303(3) 1.0355(3) 0.068(3) Uani 1 1 d . . . . .
H49 H 0.3232 0.3495 1.0577 0.082 Uiso 1 1 calc R U . . .
C50 C 0.2824(6) 0.2934(3) 1.0451(3) 0.063(2) Uani 1 1 d . . . . .
H50 H 0.2727 0.2866 1.0740 0.075 Uiso 1 1 calc R U . . .
C51 C 0.2665(5) 0.2656(2) 1.0133(2) 0.0457(18) Uani 1 1 d . . . . .
H51 H 0.2452 0.2398 1.0203 0.055 Uiso 1 1 calc R U . . .
C52 C -0.0050(4) 0.18680(19) 0.78259(19) 0.0279(13) Uani 1 1 d . . . . .
H52A H 0.0490 0.1940 0.7995 0.033 Uiso 1 1 calc R U . . .
H52B H -0.0376 0.2119 0.7758 0.033 Uiso 1 1 calc R U . . .
C53 C -0.0809(4) 0.17781(18) 0.8654(2) 0.0277(13) Uani 1 1 d . . . . .
C54 C -0.0230(4) 0.2068(2) 0.8826(2) 0.0318(14) Uani 1 1 d . . . . .
H54 H 0.0214 0.2173 0.8660 0.038 Uiso 1 1 calc R U . . .
C55 C -0.0319(4) 0.2201(2) 0.9248(2) 0.0362(15) Uani 1 1 d . . . . .
H55 H 0.0080 0.2394 0.9368 0.043 Uiso 1 1 calc R U . . .
C56 C -0.0960(5) 0.2062(2) 0.9493(2) 0.0424(17) Uani 1 1 d . . . . .
H56 H -0.1011 0.2160 0.9776 0.051 Uiso 1 1 calc R U . . .
C57 C -0.1534(4) 0.17750(19) 0.9324(2) 0.0330(15) Uani 1 1 d . . . . .
H57 H -0.1978 0.1674 0.9493 0.040 Uiso 1 1 calc R U . . .
C58 C -0.1465(4) 0.16350(19) 0.8907(2) 0.0300(14) Uani 1 1 d . . . . .
H58 H -0.1866 0.1440 0.8792 0.036 Uiso 1 1 calc R U . . .
C59 C -0.1807(4) 0.15988(19) 0.7888(2) 0.0286(14) Uani 1 1 d . . . . .
C60 C -0.2211(4) 0.1294(2) 0.7648(2) 0.0327(15) Uani 1 1 d . . . . .
H60 H -0.1917 0.1046 0.7614 0.039 Uiso 1 1 calc R U . . .
C61 C -0.3045(4) 0.1346(2) 0.7454(2) 0.0423(17) Uani 1 1 d . . . . .
H61 H -0.3311 0.1136 0.7288 0.051 Uiso 1 1 calc R U . . .
C62 C -0.3473(5) 0.1698(3) 0.7506(3) 0.051(2) Uani 1 1 d . . . . .
H62 H -0.4042 0.1733 0.7378 0.061 Uiso 1 1 calc R U . . .
C63 C -0.3079(5) 0.2006(3) 0.7745(3) 0.050(2) Uani 1 1 d . . . . .
H63 H -0.3373 0.2254 0.7777 0.060 Uiso 1 1 calc R U . . .
C64 C -0.2251(4) 0.1951(2) 0.7937(2) 0.0403(17) Uani 1 1 d . . . . .
H64 H -0.1990 0.2162 0.8105 0.048 Uiso 1 1 calc R U . . .
C65 C 0.0927(4) 0.19759(18) 0.7091(2) 0.0288(14) Uani 1 1 d . . . . .
C66 C 0.0803(4) 0.2103(2) 0.6666(2) 0.0395(17) Uani 1 1 d . . . . .
H66 H 0.0314 0.2011 0.6495 0.047 Uiso 1 1 calc R U . . .
C67 C 0.1388(5) 0.2362(3) 0.6491(3) 0.054(2) Uani 1 1 d . . . . .
H67 H 0.1301 0.2451 0.6203 0.064 Uiso 1 1 calc R U . . .
C68 C 0.2107(5) 0.2493(3) 0.6746(3) 0.052(2) Uani 1 1 d . . . . .
H68 H 0.2514 0.2669 0.6627 0.062 Uiso 1 1 calc R U . . .
C69 C 0.2238(5) 0.2371(2) 0.7165(3) 0.0453(18) Uani 1 1 d . . . . .
H69 H 0.2722 0.2469 0.7336 0.054 Uiso 1 1 calc R U . . .
C70 C 0.1662(4) 0.2104(2) 0.7338(2) 0.0344(15) Uani 1 1 d . . . . .
H70 H 0.1766 0.2009 0.7623 0.041 Uiso 1 1 calc R U . . .
C71 C -0.0782(4) 0.1634(2) 0.6971(2) 0.0300(14) Uani 1 1 d . . . . .
C72 C -0.1076(4) 0.1284(2) 0.6782(2) 0.0368(16) Uani 1 1 d . . . . .
H72 H -0.0750 0.1043 0.6821 0.044 Uiso 1 1 calc R U . . .
C73 C -0.1857(5) 0.1281(2) 0.6529(2) 0.0450(18) Uani 1 1 d . . . . .
H73 H -0.2056 0.1037 0.6400 0.054 Uiso 1 1 calc R U . . .
C74 C -0.2335(5) 0.1620(3) 0.6465(2) 0.0466(19) Uani 1 1 d . . . . .
H74 H -0.2865 0.1614 0.6295 0.056 Uiso 1 1 calc R U . . .
C75 C -0.2040(5) 0.1972(2) 0.6650(2) 0.0444(18) Uani 1 1 d . . . . .
H75 H -0.2365 0.2213 0.6605 0.053 Uiso 1 1 calc R U . . .
C76 C -0.1263(4) 0.1979(2) 0.6904(2) 0.0345(15) Uani 1 1 d . . . . .
H76 H -0.1066 0.2225 0.7032 0.041 Uiso 1 1 calc R U . . .
C77 C 0.1679(4) 0.02582(19) 0.6949(2) 0.0305(14) Uani 1 1 d . . . . .
H77A H 0.2118 0.0187 0.6743 0.037 Uiso 1 1 calc R U . . .
H77B H 0.1153 0.0095 0.6879 0.037 Uiso 1 1 calc R U . . .
C78 C 0.0742(4) 0.0804(2) 0.6387(2) 0.0338(15) Uani 1 1 d . . . . .
C79 C 0.0115(4) 0.0516(2) 0.6285(2) 0.0387(16) Uani 1 1 d . . . . .
H79 H 0.0053 0.0294 0.6472 0.046 Uiso 1 1 calc R U . . .
C80 C -0.0434(5) 0.0548(3) 0.5909(2) 0.0475(19) Uani 1 1 d . . . . .
H80 H -0.0852 0.0344 0.5844 0.057 Uiso 1 1 calc R U . . .
C81 C -0.0372(5) 0.0865(3) 0.5638(2) 0.051(2) Uani 1 1 d . . . . .
H81 H -0.0740 0.0884 0.5384 0.061 Uiso 1 1 calc R U . . .
C82 C 0.0233(6) 0.1160(3) 0.5739(3) 0.053(2) Uani 1 1 d . . . . .
H82 H 0.0275 0.1386 0.5555 0.064 Uiso 1 1 calc R U . . .
C83 C 0.0790(5) 0.1130(2) 0.6109(2) 0.0445(18) Uani 1 1 d . . . . .
H83 H 0.1207 0.1336 0.6171 0.053 Uiso 1 1 calc R U . . .
C84 C 0.2426(4) 0.1020(2) 0.6758(2) 0.0358(15) Uani 1 1 d . . . . .
C85 C 0.2813(5) 0.0926(2) 0.6381(3) 0.0482(19) Uani 1 1 d . . . . .
H85 H 0.2549 0.0736 0.6186 0.058 Uiso 1 1 calc R U . . .
C86 C 0.3590(6) 0.1110(3) 0.6290(3) 0.069(3) Uani 1 1 d . . . . .
H86 H 0.3862 0.1045 0.6033 0.083 Uiso 1 1 calc R U . . .
C87 C 0.3964(6) 0.1385(3) 0.6571(3) 0.069(3) Uani 1 1 d . . . . .
H87 H 0.4489 0.1515 0.6505 0.083 Uiso 1 1 calc R U . . .
C88 C 0.3586(5) 0.1475(3) 0.6946(3) 0.060(2) Uani 1 1 d . . . . .
H88 H 0.3857 0.1662 0.7140 0.073 Uiso 1 1 calc R U . . .
C89 C 0.2811(5) 0.1295(2) 0.7045(2) 0.0421(17) Uani 1 1 d . . . . .
H89 H 0.2549 0.1359 0.7304 0.051 Uiso 1 1 calc R U . . .
C90 C 0.3196(4) 0.0356(2) 0.7548(2) 0.0333(15) Uani 1 1 d . . . . .
C91 C 0.3756(4) 0.0357(2) 0.7212(3) 0.0413(17) Uani 1 1 d . . . . .
H91 H 0.3595 0.0224 0.6950 0.050 Uiso 1 1 calc R U . . .
C92 C 0.4546(4) 0.0551(2) 0.7264(3) 0.053(2) Uani 1 1 d . . . . .
H92 H 0.4923 0.0558 0.7034 0.064 Uiso 1 1 calc R U . . .
C93 C 0.4790(5) 0.0736(2) 0.7650(3) 0.053(2) Uani 1 1 d . . . . .
H93 H 0.5336 0.0868 0.7683 0.063 Uiso 1 1 calc R U . . .
C94 C 0.4261(4) 0.0731(2) 0.7985(3) 0.049(2) Uani 1 1 d . . . . .
H94 H 0.4441 0.0853 0.8250 0.059 Uiso 1 1 calc R U . . .
C95 C 0.3456(4) 0.0544(2) 0.7934(2) 0.0387(16) Uani 1 1 d . . . . .
H95 H 0.3079 0.0545 0.8164 0.046 Uiso 1 1 calc R U . . .
C96 C 0.2289(4) -0.03910(19) 0.7429(2) 0.0302(14) Uani 1 1 d . . . . .
C97 C 0.1578(5) -0.0629(2) 0.7305(3) 0.0440(18) Uani 1 1 d . . . . .
H97 H 0.1016 -0.0512 0.7277 0.053 Uiso 1 1 calc R U . . .
C98 C 0.1672(6) -0.1024(2) 0.7226(3) 0.059(2) Uani 1 1 d . . . . .
H98 H 0.1183 -0.1182 0.7134 0.071 Uiso 1 1 calc R U . . .
C99 C 0.2488(6) -0.1199(2) 0.7278(3) 0.057(2) Uani 1 1 d . . . . .
H99 H 0.2558 -0.1478 0.7222 0.068 Uiso 1 1 calc R U . . .
C100 C 0.3196(5) -0.0969(2) 0.7409(3) 0.057(2) Uani 1 1 d . . . . .
H100 H 0.3753 -0.1090 0.7447 0.068 Uiso 1 1 calc R U . . .
C101 C 0.3097(4) -0.0567(2) 0.7485(2) 0.0411(17) Uani 1 1 d . . . . .
H101 H 0.3586 -0.0408 0.7577 0.049 Uiso 1 1 calc R U . . .
C102 C -0.0188(4) 0.00639(18) 0.8701(2) 0.0256(13) Uani 1 1 d . . . . .
H10A H -0.0591 -0.0058 0.8479 0.031 Uiso 1 1 calc R U . . .
H10B H -0.0274 -0.0074 0.8977 0.031 Uiso 1 1 calc R U . . .
C103 C 0.0988(4) -0.05437(19) 0.8463(2) 0.0308(14) Uani 1 1 d . . . . .
C104 C 0.1799(5) -0.0700(2) 0.8386(2) 0.0444(18) Uani 1 1 d . . . . .
H104 H 0.2283 -0.0525 0.8369 0.053 Uiso 1 1 calc R U . . .
C105 C 0.1900(6) -0.1108(2) 0.8336(3) 0.058(2) Uani 1 1 d . . . . .
H105 H 0.2454 -0.1217 0.8285 0.070 Uiso 1 1 calc R U . . .
C106 C 0.1200(7) -0.1356(3) 0.8359(3) 0.062(3) Uani 1 1 d . . . . .
H106 H 0.1274 -0.1638 0.8327 0.074 Uiso 1 1 calc R U . . .
C107 C 0.0401(6) -0.1208(2) 0.8428(3) 0.056(2) Uani 1 1 d . . . . .
H107 H -0.0079 -0.1385 0.8441 0.067 Uiso 1 1 calc R U . . .
C108 C 0.0290(5) -0.0800(2) 0.8478(2) 0.0426(18) Uani 1 1 d . . . . .
H108 H -0.0270 -0.0695 0.8522 0.051 Uiso 1 1 calc R U . . .
C109 C 0.1565(4) 0.00323(19) 0.9077(2) 0.0273(13) Uani 1 1 d . . . . .
C110 C 0.1725(4) -0.0297(2) 0.9347(2) 0.0349(15) Uani 1 1 d . . . . .
H110 H 0.1521 -0.0556 0.9260 0.042 Uiso 1 1 calc R U . . .
C111 C 0.2186(5) -0.0249(2) 0.9747(2) 0.0442(18) Uani 1 1 d . . . . .
H111 H 0.2304 -0.0479 0.9922 0.053 Uiso 1 1 calc R U . . .
C112 C 0.2464(4) 0.0116(2) 0.9886(2) 0.0394(17) Uani 1 1 d . . . . .
H112 H 0.2766 0.0147 1.0158 0.047 Uiso 1 1 calc R U . . .
C113 C 0.2301(5) 0.0441(2) 0.9624(2) 0.0413(17) Uani 1 1 d . . . . .
H113 H 0.2480 0.0701 0.9721 0.050 Uiso 1 1 calc R U . . .
C114 C 0.1876(4) 0.0400(2) 0.9217(2) 0.0339(15) Uani 1 1 d . . . . .
H114 H 0.1801 0.0628 0.9036 0.041 Uiso 1 1 calc R U . . .
C115 C -0.0061(4) 0.07277(18) 0.9304(2) 0.0275(13) Uani 1 1 d . . . . .
C116 C 0.0282(4) 0.11059(19) 0.9377(2) 0.0302(14) Uani 1 1 d . . . . .
H116 H 0.0387 0.1275 0.9140 0.036 Uiso 1 1 calc R U . . .
C117 C 0.0476(4) 0.1243(2) 0.9792(2) 0.0356(16) Uani 1 1 d . . . . .
H117 H 0.0696 0.1508 0.9833 0.043 Uiso 1 1 calc R U . . .
C118 C 0.0356(4) 0.1005(2) 1.0145(2) 0.0362(16) Uani 1 1 d . . . . .
H118 H 0.0486 0.1102 1.0427 0.043 Uiso 1 1 calc R U . . .
C119 C 0.0044(4) 0.0622(2) 1.0075(2) 0.0354(15) Uani 1 1 d . . . . .
H119 H -0.0024 0.0448 1.0312 0.042 Uiso 1 1 calc R U . . .
C120 C -0.0173(4) 0.04876(19) 0.9662(2) 0.0318(14) Uani 1 1 d . . . . .
H120 H -0.0404 0.0224 0.9622 0.038 Uiso 1 1 calc R U . . .
C121 C -0.1619(4) 0.05944(16) 0.87787(19) 0.0227(12) Uani 1 1 d . . . . .
C122 C -0.2035(4) 0.06867(19) 0.9148(2) 0.0300(14) Uani 1 1 d . . . . .
H122 H -0.1706 0.0737 0.9409 0.036 Uiso 1 1 calc R U . . .
C123 C -0.2936(4) 0.0705(2) 0.9135(2) 0.0334(15) Uani 1 1 d . . . . .
H123 H -0.3219 0.0771 0.9388 0.040 Uiso 1 1 calc R U . . .
C124 C -0.3424(4) 0.0629(2) 0.8760(2) 0.0374(16) Uani 1 1 d . . . . .
H124 H -0.4039 0.0639 0.8757 0.045 Uiso 1 1 calc R U . . .
C125 C -0.3020(4) 0.0538(2) 0.8390(2) 0.0387(16) Uani 1 1 d . . . . .
H125 H -0.3357 0.0485 0.8132 0.046 Uiso 1 1 calc R U . . .
C126 C -0.2115(4) 0.05234(19) 0.8395(2) 0.0299(14) Uani 1 1 d . . . . .
H126 H -0.1835 0.0465 0.8139 0.036 Uiso 1 1 calc R U . . .
C127 C -0.2924(5) -0.0200(2) 0.6566(2) 0.0389(16) Uani 1 1 d . . . . .
C128 C -0.3387(5) -0.0549(2) 0.6435(2) 0.0423(18) Uani 1 1 d . . . . .
C129 C -0.3932(4) -0.0662(2) 0.6774(3) 0.0398(18) Uani 1 1 d . . . . .
C130 C -0.3809(4) -0.0376(2) 0.7111(2) 0.0401(17) Uani 1 1 d . . . . .
C131 C -0.3203(4) -0.00892(18) 0.6983(2) 0.0304(14) Uani 1 1 d . . . . .
C132 C -0.2301(5) 0.0024(2) 0.6304(3) 0.055(2) Uani 1 1 d . . . . .
H13A H -0.2603 0.0247 0.6154 0.082 Uiso 1 1 calc R U . . .
H13B H -0.2067 -0.0159 0.6094 0.082 Uiso 1 1 calc R U . . .
H13C H -0.1826 0.0130 0.6493 0.082 Uiso 1 1 calc R U . . .
C133 C -0.3405(7) -0.0719(3) 0.5986(3) 0.066(3) Uani 1 1 d . . . . .
H13D H -0.3727 -0.0973 0.5976 0.099 Uiso 1 1 calc R U . . .
H13E H -0.2809 -0.0767 0.5905 0.099 Uiso 1 1 calc R U . . .
H13F H -0.3689 -0.0527 0.5785 0.099 Uiso 1 1 calc R U . . .
C134 C -0.4621(5) -0.0977(2) 0.6760(3) 0.062(3) Uani 1 1 d . . . . .
H13G H -0.5190 -0.0848 0.6777 0.093 Uiso 1 1 calc R U . . .
H13H H -0.4520 -0.1161 0.7003 0.093 Uiso 1 1 calc R U . . .
H13I H -0.4607 -0.1128 0.6491 0.093 Uiso 1 1 calc R U . . .
C135 C -0.4318(5) -0.0351(3) 0.7505(3) 0.056(2) Uani 1 1 d . . . . .
H13J H -0.3961 -0.0226 0.7738 0.084 Uiso 1 1 calc R U . . .
H13K H -0.4484 -0.0623 0.7592 0.084 Uiso 1 1 calc R U . . .
H13L H -0.4841 -0.0190 0.7443 0.084 Uiso 1 1 calc R U . . .
C136 C -0.2952(5) 0.0288(2) 0.7215(3) 0.0473(19) Uani 1 1 d . . . . .
H13M H -0.2344 0.0351 0.7169 0.071 Uiso 1 1 calc R U . . .
H13N H -0.3022 0.0252 0.7523 0.071 Uiso 1 1 calc R U . . .
H13O H -0.3323 0.0509 0.7107 0.071 Uiso 1 1 calc R U . . .
C137 C -0.0841(4) -0.1275(2) 0.7219(2) 0.0379(16) Uani 1 1 d . . . . .
C138 C -0.1407(5) -0.1438(2) 0.7564(2) 0.048(2) Uani 1 1 d . . . . .
C139 C -0.0880(4) -0.09580(19) 0.6347(2) 0.0349(15) Uani 1 1 d . . . . .
C140 C -0.0970(6) -0.1109(2) 0.5931(2) 0.0482(19) Uani 1 1 d . . . . .
H140 H -0.1419 -0.1297 0.5858 0.058 Uiso 1 1 calc R U . . .
C141 C -0.0414(6) -0.0991(3) 0.5621(3) 0.061(2) Uani 1 1 d . . . . .
H141 H -0.0482 -0.1096 0.5339 0.074 Uiso 1 1 calc R U . . .
C142 C 0.0240(6) -0.0718(3) 0.5726(3) 0.063(2) Uani 1 1 d . . . . .
H142 H 0.0632 -0.0641 0.5517 0.076 Uiso 1 1 calc R U . . .
C143 C 0.0323(6) -0.0556(3) 0.6136(3) 0.063(2) Uani 1 1 d . . . . .
H143 H 0.0767 -0.0366 0.6208 0.075 Uiso 1 1 calc R U . . .
C144 C -0.0242(5) -0.0674(2) 0.6436(3) 0.049(2) Uani 1 1 d . . . . .
H144 H -0.0192 -0.0556 0.6713 0.059 Uiso 1 1 calc R U . . .
C145 C -0.2024(4) -0.15840(19) 0.6550(2) 0.0323(14) Uani 1 1 d . . . . .
C146 C -0.2908(5) -0.1614(2) 0.6429(3) 0.056(2) Uani 1 1 d . . . . .
H146 H -0.3269 -0.1385 0.6456 0.067 Uiso 1 1 calc R U . . .
C147 C -0.3269(6) -0.1969(2) 0.6271(3) 0.063(3) Uani 1 1 d . . . . .
H147 H -0.3869 -0.1987 0.6187 0.076 Uiso 1 1 calc R U . . .
C148 C -0.2732(5) -0.2296(2) 0.6241(3) 0.0483(19) Uani 1 1 d . . . . .
H148 H -0.2959 -0.2540 0.6121 0.058 Uiso 1 1 calc R U . . .
C149 C -0.1877(5) -0.2277(2) 0.6379(3) 0.0431(18) Uani 1 1 d . . . . .
H149 H -0.1525 -0.2511 0.6373 0.052 Uiso 1 1 calc R U . . .
C150 C -0.1520(4) -0.1916(2) 0.6529(2) 0.0363(16) Uani 1 1 d . . . . .
H150 H -0.0921 -0.1902 0.6618 0.044 Uiso 1 1 calc R U . . .
C151 C -0.2232(4) -0.09475(19) 0.8177(2) 0.0296(14) Uani 1 1 d . . . . .
C152 C -0.2306(4) -0.05503(18) 0.8299(2) 0.0264(13) Uani 1 1 d . . . . .
H152 H -0.2410 -0.0347 0.8089 0.032 Uiso 1 1 calc R U . . .
C153 C -0.2228(4) -0.0449(2) 0.8733(2) 0.0342(15) Uani 1 1 d . . . . .
H153 H -0.2289 -0.0175 0.8812 0.041 Uiso 1 1 calc R U . . .
C154 C -0.2066(4) -0.0731(2) 0.9051(2) 0.0367(16) Uani 1 1 d . . . . .
H154 H -0.2007 -0.0655 0.9344 0.044 Uiso 1 1 calc R U . . .
C155 C -0.1992(4) -0.1126(2) 0.8930(2) 0.0386(16) Uani 1 1 d . . . . .
H155 H -0.1881 -0.1328 0.9142 0.046 Uiso 1 1 calc R U . . .
C156 C -0.2079(4) -0.1231(2) 0.8499(2) 0.0360(15) Uani 1 1 d . . . . .
H156 H -0.2032 -0.1506 0.8421 0.043 Uiso 1 1 calc R U . . .
C157 C -0.3271(5) -0.1461(2) 0.7661(2) 0.0387(17) Uani 1 1 d . . . . .
C158 C -0.3940(5) -0.1368(2) 0.7920(2) 0.0437(18) Uani 1 1 d . . . . .
H158 H -0.3918 -0.1127 0.8083 0.052 Uiso 1 1 calc R U . . .
C159 C -0.4646(6) -0.1627(3) 0.7943(3) 0.059(2) Uani 1 1 d . . . . .
H159 H -0.5109 -0.1562 0.8118 0.070 Uiso 1 1 calc R U . . .
C160 C -0.4665(7) -0.1976(3) 0.7709(3) 0.073(3) Uani 1 1 d . . . . .
H160 H -0.5136 -0.2158 0.7728 0.087 Uiso 1 1 calc R U . . .
C161 C -0.4022(8) -0.2064(3) 0.7451(4) 0.083(3) Uani 1 1 d . . . . .
H161 H -0.4051 -0.2302 0.7283 0.099 Uiso 1 1 calc R U . . .
C162 C -0.3321(6) -0.1809(2) 0.7429(3) 0.058(2) Uani 1 1 d . . . . .
H162 H -0.2866 -0.1876 0.7249 0.070 Uiso 1 1 calc R U . . .
P200 P 0.0505(5) 0.2282(2) 1.0789(4) 0.230(4) Uani 1 1 d D . . . .
C219 C -0.2644(7) 0.1472(3) 1.0409(3) 0.046(2) Uiso 0.75 1 d . . P . .
F201 F 0.063(3) 0.1904(6) 1.0526(10) 0.65(3) Uani 1 1 d D U . . .
F202 F 0.1416(10) 0.2336(8) 1.0905(6) 0.337(12) Uani 1 1 d D . . . .
F203 F 0.0534(14) 0.2046(7) 1.1250(11) 0.46(2) Uani 1 1 d . . . . .
F204 F 0.0563(12) 0.2510(6) 1.0327(6) 0.278(8) Uani 1 1 d . . . . .
F205 F -0.0486(12) 0.2321(7) 1.0852(14) 0.65(4) Uani 1 1 d D . . . .
F206 F 0.0499(19) 0.2706(6) 1.1097(10) 0.47(2) Uani 1 1 d D . . . .
C210 C 0.6181(17) 0.2587(8) 0.6963(9) 0.102(8) Uiso 0.5 1 d . . P . .
H21D H 0.6048 0.2508 0.6664 0.154 Uiso 0.5 1 calc R U P . .
H21E H 0.6518 0.2837 0.6972 0.154 Uiso 0.5 1 calc R U P . .
H21F H 0.6518 0.2374 0.7112 0.154 Uiso 0.5 1 calc R U P . .
C211 C 0.543(2) 0.2646(10) 0.7162(11) 0.123(10) Uiso 0.5 1 d D . P . .
C212 C 0.468(2) 0.2603(11) 0.6890(11) 0.154(13) Uiso 0.5 1 d D . P . .
H21G H 0.4841 0.2520 0.6605 0.231 Uiso 0.5 1 calc R U P . .
H21H H 0.4301 0.2398 0.7007 0.231 Uiso 0.5 1 calc R U P . .
H21I H 0.4369 0.2860 0.6870 0.231 Uiso 0.5 1 calc R U P . .
O213 O 0.5426(17) 0.2744(8) 0.7533(9) 0.176(10) Uiso 0.5 1 d D . P . .
C214 C 0.761(3) 0.2954(14) 0.9944(10) 0.091(14) Uiso 0.25 1 d D . P A 1
H21J H 0.8223 0.3036 0.9977 0.136 Uiso 0.25 1 calc R U P A 1
H21K H 0.7579 0.2668 0.9867 0.136 Uiso 0.25 1 calc R U P A 1
H21L H 0.7313 0.3115 0.9718 0.136 Uiso 0.25 1 calc R U P A 1
C215 C 0.725(3) 0.3414(8) 1.0139(12) 0.072(11) Uiso 0.25 1 d D . P A 2
H21X H 0.7843 0.3485 1.0079 0.108 Uiso 0.25 1 calc R U P A 2
H21Z H 0.6880 0.3421 0.9872 0.108 Uiso 0.25 1 calc R U P A 2
H21Y H 0.7025 0.3606 1.0344 0.108 Uiso 0.25 1 calc R U P A 2
C216 C 0.7231(15) 0.3012(6) 1.0320(7) 0.075(6) Uiso 0.5 1 d D . P . .
C217 C 0.786(2) 0.2979(10) 1.0637(9) 0.150(12) Uiso 0.5 1 d D . P A .
H21M H 0.8423 0.3049 1.0524 0.225 Uiso 0.5 1 calc R U P . .
H21N H 0.7741 0.3163 1.0871 0.225 Uiso 0.5 1 calc R U P . .
H21O H 0.7882 0.2702 1.0744 0.225 Uiso 0.5 1 calc R U P . .
O217 O 0.6549(14) 0.2947(6) 1.0381(6) 0.125(6) Uiso 0.5 1 d . . P A .
C218 C -0.1713(8) 0.1460(4) 1.0462(4) 0.067(3) Uiso 0.75 1 d . . P . .
H21P H -0.1514 0.1650 1.0686 0.101 Uiso 0.75 1 calc R U P . .
H21Q H -0.1527 0.1187 1.0545 0.101 Uiso 0.75 1 calc R U P . .
H21R H -0.1465 0.1533 1.0191 0.101 Uiso 0.75 1 calc R U P . .
C220 C -0.3161(9) 0.1714(4) 1.0683(5) 0.080(4) Uiso 0.75 1 d . . P . .
H22D H -0.2777 0.1872 1.0879 0.119 Uiso 0.75 1 calc R U P . .
H22E H -0.3532 0.1896 1.0506 0.119 Uiso 0.75 1 calc R U P . .
H22F H -0.3524 0.1538 1.0849 0.119 Uiso 0.75 1 calc R U P . .
O221 O -0.3023(6) 0.1258(3) 1.0147(3) 0.077(2) Uiso 0.75 1 d . . P . .
C222 C -0.4529(13) -0.0580(8) 0.8882(8) 0.098(7) Uiso 0.5 1 d D . P . .
H22G H -0.4148 -0.0579 0.8642 0.146 Uiso 0.5 1 calc R U P . .
H22H H -0.4495 -0.0318 0.9028 0.146 Uiso 0.5 1 calc R U P . .
H22I H -0.4346 -0.0792 0.9085 0.146 Uiso 0.5 1 calc R U P . .
C223 C -0.5420(11) -0.0653(6) 0.8721(6) 0.060(5) Uiso 0.5 1 d D . P . .
C224 C -0.5964(19) -0.0663(9) 0.8980(9) 0.117(9) Uiso 0.5 1 d . . P . .
H22J H -0.5816 -0.0468 0.9209 0.175 Uiso 0.5 1 calc R U P . .
H22K H -0.6529 -0.0593 0.8840 0.175 Uiso 0.5 1 calc R U P . .
H22L H -0.5990 -0.0934 0.9103 0.175 Uiso 0.5 1 calc R U P . .
O225 O -0.5567(13) -0.0888(6) 0.8428(7) 0.127(6) Uiso 0.5 1 d . . P . .
C226 C 0.2733(16) 0.0293(8) 0.5122(8) 0.176(10) Uiso 0.75 1 d D . P . .
H22M H 0.2576 0.0573 0.5180 0.264 Uiso 0.75 1 calc R U P . .
H22N H 0.3121 0.0192 0.5357 0.264 Uiso 0.75 1 calc R U P . .
H22O H 0.3027 0.0279 0.4852 0.264 Uiso 0.75 1 calc R U P . .
C227 C 0.2032(15) 0.0073(7) 0.5091(7) 0.129(7) Uiso 0.75 1 d D . P . .
C228 C 0.1324(13) 0.0221(6) 0.5231(6) 0.122(6) Uiso 0.75 1 d . . P . .
H22P H 0.1393 0.0511 0.5276 0.184 Uiso 0.75 1 calc R U P . .
H22Q H 0.0840 0.0172 0.5020 0.184 Uiso 0.75 1 calc R U P . .
H22R H 0.1203 0.0091 0.5503 0.184 Uiso 0.75 1 calc R U P . .
O229 O 0.2041(13) -0.0312(7) 0.5015(6) 0.197(7) Uiso 0.75 1 d . . P . .
C230 C 0.2785(14) -0.0848(7) 0.6107(7) 0.083(6) Uiso 0.5 1 d . . P . .
H23D H 0.3238 -0.1044 0.6051 0.124 Uiso 0.5 1 calc R U P . .
H23E H 0.2617 -0.0877 0.6404 0.124 Uiso 0.5 1 calc R U P . .
H23F H 0.2279 -0.0894 0.5909 0.124 Uiso 0.5 1 calc R U P . .
C231 C 0.3070(14) -0.0498(7) 0.6053(7) 0.075(6) Uiso 0.5 1 d D . P . .
C232 C 0.393(2) -0.0351(13) 0.6015(14) 0.209(19) Uiso 0.5 1 d D . P . .
H23G H 0.4323 -0.0579 0.5977 0.314 Uiso 0.5 1 calc R U P . .
H23H H 0.3942 -0.0172 0.5767 0.314 Uiso 0.5 1 calc R U P . .
H23I H 0.4118 -0.0203 0.6276 0.314 Uiso 0.5 1 calc R U P . .
O233 O 0.2679(11) -0.0195(5) 0.6096(5) 0.098(5) Uiso 0.5 1 d . . P . .
C234 C 0.966(2) 0.3806(11) 1.0280(10) 0.180(16) Uiso 0.5 1 d D . P . .
H23J H 0.9879 0.4073 1.0214 0.270 Uiso 0.5 1 calc R U P . .
H23K H 0.9041 0.3827 1.0340 0.270 Uiso 0.5 1 calc R U P . .
H23L H 0.9984 0.3696 1.0531 0.270 Uiso 0.5 1 calc R U P . .
C235 C 0.9739(12) 0.3561(5) 0.9943(6) 0.059(4) Uiso 0.5 1 d D . P . .
C236 C 1.0654(15) 0.3540(8) 0.9927(8) 0.106(8) Uiso 0.5 1 d D . P . .
H23M H 1.0888 0.3811 0.9889 0.160 Uiso 0.5 1 calc R U P . .
H23N H 1.0905 0.3425 1.0196 0.160 Uiso 0.5 1 calc R U P . .
H23O H 1.0802 0.3370 0.9686 0.160 Uiso 0.5 1 calc R U P . .
O237 O 0.947(3) 0.3208(11) 0.999(2) 0.47(4) Uiso 0.5 1 d D . P . .
 
loop_
 _atom_site_aniso_label
 _atom_site_aniso_U_11
 _atom_site_aniso_U_22
 _atom_site_aniso_U_33
 _atom_site_aniso_U_23
 _atom_site_aniso_U_13
 _atom_site_aniso_U_12
Ru1 0.0177(2) 0.0284(3) 0.0267(3) 0.0018(2) -0.00161(18) -0.00255(19)
Ru2 0.0252(2) 0.0230(3) 0.0311(3) -0.0023(2) -0.0052(2) -0.0020(2)
Cu3 0.0188(3) 0.0228(4) 0.0273(4) 0.0027(3) 0.0034(3) 0.0001(3)
Cu4 0.0215(4) 0.0260(4) 0.0256(4) 0.0023(3) 0.0018(3) -0.0006(3)
Cu5 0.0178(3) 0.0251(4) 0.0275(4) 0.0023(3) 0.0007(3) 0.0017(3)
C1 0.021(3) 0.034(4) 0.032(3) 0.003(3) -0.001(3) 0.001(3)
C2 0.020(3) 0.029(3) 0.030(3) 0.000(3) -0.002(2) 0.000(2)
C3 0.020(3) 0.028(3) 0.027(3) 0.004(3) 0.002(2) 0.003(2)
C4 0.016(3) 0.032(3) 0.024(3) -0.002(3) 0.003(2) 0.001(2)
C5 0.022(3) 0.024(3) 0.030(3) 0.004(3) -0.003(2) -0.002(2)
P6 0.0212(7) 0.0301(9) 0.0281(8) 0.0043(7) -0.0015(6) -0.0034(6)
C6 0.017(3) 0.032(3) 0.023(3) 0.004(3) -0.001(2) 0.002(2)
P7 0.0214(7) 0.0296(8) 0.0286(8) 0.0003(7) -0.0004(6) -0.0020(6)
C7 0.021(3) 0.028(3) 0.031(3) -0.001(3) 0.001(2) -0.001(2)
P8 0.0207(7) 0.0244(8) 0.0294(8) 0.0043(7) 0.0033(6) 0.0043(6)
C8 0.029(3) 0.026(3) 0.027(3) 0.000(3) 0.001(3) 0.003(3)
P9 0.0253(8) 0.0270(8) 0.0253(8) 0.0040(7) 0.0020(6) 0.0013(6)
P10 0.0255(8) 0.0335(9) 0.0269(9) 0.0015(7) 0.0037(6) 0.0023(7)
P11 0.0189(7) 0.0282(8) 0.0313(9) -0.0017(7) 0.0009(6) 0.0027(6)
P12 0.0182(7) 0.0258(8) 0.0297(8) 0.0043(7) 0.0010(6) 0.0033(6)
P13 0.0172(7) 0.0241(8) 0.0279(8) 0.0072(6) 0.0013(6) -0.0003(6)
P14 0.0308(9) 0.0268(9) 0.0331(9) -0.0069(7) -0.0016(7) -0.0016(7)
P15 0.0300(8) 0.0235(8) 0.0295(9) -0.0018(7) -0.0044(7) -0.0005(6)
C16 0.020(3) 0.040(4) 0.038(4) 0.012(3) 0.002(3) -0.006(3)
C17 0.023(3) 0.038(4) 0.051(4) 0.000(3) 0.009(3) -0.007(3)
C18 0.017(3) 0.069(5) 0.036(4) 0.007(4) 0.002(3) -0.002(3)
C19 0.027(3) 0.041(4) 0.055(5) 0.024(4) 0.017(3) 0.004(3)
C20 0.024(3) 0.037(4) 0.045(4) 0.002(3) 0.005(3) -0.010(3)
C21 0.023(4) 0.093(7) 0.065(6) 0.039(5) -0.005(4) -0.003(4)
C22 0.047(5) 0.045(5) 0.119(8) -0.015(5) 0.043(5) 0.002(4)
C23 0.043(5) 0.181(12) 0.034(5) -0.008(6) 0.005(4) -0.033(6)
C24 0.039(4) 0.075(6) 0.103(8) 0.056(6) 0.025(5) 0.016(4)
C25 0.059(5) 0.047(5) 0.085(7) -0.020(5) 0.026(5) -0.025(4)
C26 0.021(3) 0.029(3) 0.047(4) 0.011(3) 0.002(3) -0.003(3)
C27 0.023(3) 0.034(4) 0.047(4) 0.006(3) 0.001(3) -0.008(3)
C28 0.028(3) 0.048(4) 0.026(3) 0.000(3) -0.001(3) -0.006(3)
C29 0.055(5) 0.061(5) 0.035(4) 0.009(4) -0.002(3) -0.024(4)
C30 0.084(7) 0.082(7) 0.031(4) 0.002(4) -0.002(4) -0.032(5)
C31 0.064(5) 0.078(6) 0.031(4) -0.009(4) -0.004(4) -0.014(5)
C32 0.050(5) 0.057(5) 0.036(4) -0.009(4) -0.009(3) -0.015(4)
C33 0.030(3) 0.049(4) 0.034(4) 0.010(3) -0.003(3) -0.006(3)
C34 0.018(3) 0.034(4) 0.042(4) 0.010(3) 0.003(3) -0.002(3)
C35 0.039(4) 0.033(4) 0.045(4) 0.004(3) -0.003(3) 0.006(3)
C36 0.049(5) 0.038(4) 0.064(5) 0.002(4) -0.004(4) 0.003(4)
C37 0.039(4) 0.039(4) 0.070(6) 0.015(4) 0.014(4) 0.008(3)
C38 0.034(4) 0.058(5) 0.068(6) 0.018(5) -0.004(4) 0.014(4)
C39 0.036(4) 0.051(5) 0.051(5) 0.011(4) -0.008(3) 0.001(3)
C40 0.020(3) 0.025(3) 0.041(4) 0.001(3) -0.004(3) -0.001(2)
C41 0.034(4) 0.038(4) 0.041(4) 0.001(3) 0.004(3) 0.004(3)
C42 0.039(4) 0.046(4) 0.056(5) -0.007(4) -0.004(4) 0.016(3)
C43 0.041(4) 0.043(4) 0.055(5) 0.007(4) -0.009(4) 0.016(3)
C44 0.047(4) 0.039(4) 0.037(4) -0.002(3) -0.010(3) 0.006(3)
C45 0.025(3) 0.028(3) 0.042(4) 0.003(3) -0.004(3) 0.003(3)
C46 0.029(3) 0.040(4) 0.032(4) -0.005(3) 0.000(3) 0.001(3)
C47 0.053(5) 0.054(5) 0.051(5) -0.020(4) 0.016(4) -0.017(4)
C48 0.071(6) 0.060(6) 0.066(6) -0.026(5) 0.015(5) -0.026(5)
C49 0.068(6) 0.080(7) 0.057(6) -0.036(5) 0.008(5) -0.015(5)
C50 0.087(7) 0.064(6) 0.038(5) -0.011(4) 0.010(4) 0.000(5)
C51 0.053(5) 0.045(4) 0.040(4) -0.007(4) 0.007(3) -0.002(4)
C52 0.029(3) 0.030(3) 0.025(3) 0.003(3) 0.003(3) 0.003(3)
C53 0.029(3) 0.026(3) 0.028(3) 0.009(3) 0.002(3) 0.010(3)
C54 0.025(3) 0.038(4) 0.033(4) 0.001(3) 0.002(3) 0.006(3)
C55 0.035(4) 0.036(4) 0.037(4) -0.003(3) 0.006(3) 0.004(3)
C56 0.047(4) 0.047(4) 0.033(4) -0.002(3) 0.003(3) 0.016(4)
C57 0.033(3) 0.032(4) 0.036(4) 0.009(3) 0.013(3) 0.013(3)
C58 0.028(3) 0.030(3) 0.032(3) 0.008(3) 0.003(3) 0.009(3)
C59 0.019(3) 0.033(3) 0.034(4) 0.008(3) 0.009(3) 0.005(3)
C60 0.029(3) 0.031(4) 0.039(4) 0.007(3) 0.004(3) -0.003(3)
C61 0.029(4) 0.055(5) 0.043(4) -0.004(4) 0.003(3) -0.007(3)
C62 0.022(3) 0.079(6) 0.052(5) -0.001(4) -0.001(3) 0.008(4)
C63 0.043(4) 0.059(5) 0.048(5) -0.009(4) -0.002(4) 0.023(4)
C64 0.035(4) 0.046(4) 0.039(4) -0.002(3) -0.003(3) 0.014(3)
C65 0.028(3) 0.026(3) 0.032(3) 0.006(3) -0.001(3) 0.000(3)
C66 0.032(4) 0.052(4) 0.035(4) 0.010(3) -0.003(3) -0.006(3)
C67 0.043(4) 0.074(6) 0.044(5) 0.027(4) 0.000(4) -0.012(4)
C68 0.040(4) 0.061(5) 0.055(5) 0.019(4) 0.007(4) -0.018(4)
C69 0.035(4) 0.049(5) 0.051(5) 0.005(4) -0.001(3) -0.009(3)
C70 0.030(3) 0.041(4) 0.032(4) 0.010(3) 0.002(3) 0.001(3)
C71 0.024(3) 0.038(4) 0.028(3) 0.005(3) 0.002(3) -0.002(3)
C72 0.026(3) 0.049(4) 0.035(4) 0.000(3) 0.004(3) -0.001(3)
C73 0.037(4) 0.058(5) 0.040(4) -0.008(4) 0.004(3) -0.008(4)
C74 0.030(4) 0.074(6) 0.035(4) 0.010(4) -0.004(3) -0.003(4)
C75 0.038(4) 0.054(5) 0.041(4) 0.019(4) -0.005(3) 0.006(3)
C76 0.036(4) 0.037(4) 0.030(4) 0.007(3) 0.001(3) 0.000(3)
C77 0.027(3) 0.033(4) 0.031(3) -0.002(3) 0.002(3) 0.001(3)
C78 0.039(4) 0.039(4) 0.024(3) 0.000(3) 0.006(3) 0.009(3)
C79 0.038(4) 0.041(4) 0.037(4) 0.000(3) -0.001(3) 0.005(3)
C80 0.044(4) 0.062(5) 0.036(4) 0.001(4) -0.005(3) 0.007(4)
C81 0.055(5) 0.067(6) 0.030(4) 0.003(4) -0.008(3) 0.016(4)
C82 0.063(5) 0.055(5) 0.041(5) 0.018(4) 0.004(4) 0.014(4)
C83 0.045(4) 0.051(5) 0.038(4) 0.004(4) 0.002(3) 0.005(3)
C84 0.031(3) 0.043(4) 0.034(4) 0.004(3) 0.009(3) 0.002(3)
C85 0.041(4) 0.057(5) 0.048(5) -0.001(4) 0.014(3) 0.000(4)
C86 0.051(5) 0.099(8) 0.061(6) 0.011(6) 0.032(4) 0.002(5)
C87 0.049(5) 0.073(7) 0.089(7) 0.004(6) 0.023(5) -0.020(5)
C88 0.048(5) 0.058(5) 0.076(6) -0.001(5) 0.010(4) -0.013(4)
C89 0.037(4) 0.042(4) 0.049(4) -0.002(3) 0.007(3) -0.001(3)
C90 0.020(3) 0.040(4) 0.041(4) 0.004(3) 0.001(3) 0.006(3)
C91 0.025(3) 0.045(4) 0.055(5) 0.006(4) 0.009(3) 0.004(3)
C92 0.023(4) 0.050(5) 0.087(7) 0.013(5) 0.015(4) 0.005(3)
C93 0.021(3) 0.046(5) 0.091(7) 0.000(4) -0.001(4) -0.003(3)
C94 0.026(4) 0.054(5) 0.066(5) -0.002(4) -0.009(4) -0.007(3)
C95 0.026(3) 0.038(4) 0.052(5) 0.004(3) -0.002(3) -0.002(3)
C96 0.028(3) 0.030(3) 0.033(4) -0.001(3) 0.005(3) 0.008(3)
C97 0.032(4) 0.035(4) 0.063(5) -0.006(4) -0.009(3) 0.003(3)
C98 0.055(5) 0.037(4) 0.083(7) -0.014(4) -0.013(5) -0.001(4)
C99 0.065(5) 0.030(4) 0.076(6) -0.014(4) 0.010(5) 0.011(4)
C100 0.046(5) 0.050(5) 0.077(6) 0.004(4) 0.022(4) 0.025(4)
C101 0.029(4) 0.042(4) 0.053(5) 0.003(3) 0.007(3) 0.005(3)
C102 0.017(3) 0.027(3) 0.032(3) 0.009(3) 0.003(2) 0.001(2)
C103 0.034(3) 0.028(3) 0.030(3) 0.005(3) 0.001(3) 0.007(3)
C104 0.050(4) 0.044(4) 0.040(4) 0.007(3) 0.010(3) 0.014(4)
C105 0.083(6) 0.039(5) 0.052(5) 0.007(4) 0.010(5) 0.035(5)
C106 0.097(7) 0.033(4) 0.054(5) 0.000(4) -0.012(5) 0.018(5)
C107 0.057(5) 0.029(4) 0.078(6) -0.002(4) -0.022(4) 0.008(4)
C108 0.043(4) 0.029(4) 0.055(5) 0.004(3) -0.008(4) 0.009(3)
C109 0.018(3) 0.034(3) 0.031(3) 0.004(3) 0.007(2) 0.006(2)
C110 0.041(4) 0.034(4) 0.030(4) 0.008(3) 0.004(3) 0.000(3)
C111 0.052(5) 0.047(5) 0.033(4) 0.011(3) 0.000(3) 0.004(4)
C112 0.030(4) 0.055(5) 0.033(4) 0.008(3) -0.001(3) 0.003(3)
C113 0.039(4) 0.043(4) 0.042(4) 0.001(3) 0.001(3) -0.007(3)
C114 0.025(3) 0.035(4) 0.041(4) 0.011(3) -0.003(3) -0.001(3)
C115 0.015(3) 0.029(3) 0.039(4) 0.005(3) -0.001(2) 0.000(2)
C116 0.019(3) 0.035(4) 0.037(4) 0.013(3) 0.001(3) 0.000(3)
C117 0.026(3) 0.038(4) 0.043(4) 0.003(3) -0.003(3) -0.004(3)
C118 0.026(3) 0.049(4) 0.032(4) -0.002(3) -0.004(3) 0.001(3)
C119 0.035(4) 0.040(4) 0.032(4) 0.013(3) 0.000(3) 0.003(3)
C120 0.032(3) 0.027(3) 0.036(4) 0.004(3) -0.003(3) 0.002(3)
C121 0.021(3) 0.017(3) 0.031(3) 0.008(2) 0.003(2) 0.000(2)
C122 0.026(3) 0.035(4) 0.030(3) 0.009(3) 0.002(3) 0.003(3)
C123 0.023(3) 0.041(4) 0.037(4) 0.006(3) 0.010(3) 0.006(3)
C124 0.018(3) 0.045(4) 0.050(4) 0.007(3) 0.009(3) 0.004(3)
C125 0.025(3) 0.053(4) 0.037(4) 0.003(3) -0.004(3) 0.002(3)
C126 0.027(3) 0.035(4) 0.028(3) 0.006(3) 0.005(3) 0.007(3)
C127 0.044(4) 0.033(4) 0.039(4) 0.009(3) -0.007(3) -0.003(3)
C128 0.050(4) 0.035(4) 0.040(4) 0.000(3) -0.014(3) 0.009(3)
C129 0.031(4) 0.027(3) 0.060(5) 0.007(3) -0.020(3) -0.003(3)
C130 0.019(3) 0.043(4) 0.058(5) 0.015(4) 0.000(3) 0.004(3)
C131 0.022(3) 0.024(3) 0.045(4) -0.002(3) -0.005(3) 0.004(2)
C132 0.061(5) 0.050(5) 0.055(5) 0.018(4) 0.011(4) -0.001(4)
C133 0.094(7) 0.056(5) 0.045(5) -0.003(4) -0.024(5) 0.020(5)
C134 0.044(5) 0.037(4) 0.101(7) 0.007(5) -0.027(5) -0.009(4)
C135 0.032(4) 0.065(6) 0.071(6) 0.022(5) 0.014(4) 0.011(4)
C136 0.042(4) 0.031(4) 0.069(5) -0.011(4) 0.004(4) 0.001(3)
C137 0.035(4) 0.041(4) 0.037(4) -0.010(3) -0.007(3) 0.009(3)
C138 0.049(4) 0.059(5) 0.037(4) 0.000(4) -0.002(3) 0.027(4)
C139 0.039(4) 0.027(3) 0.039(4) -0.002(3) 0.001(3) 0.002(3)
C140 0.074(6) 0.040(4) 0.031(4) 0.004(3) 0.004(4) -0.012(4)
C141 0.095(7) 0.047(5) 0.044(5) -0.008(4) 0.022(5) -0.011(5)
C142 0.081(6) 0.050(5) 0.062(6) -0.001(4) 0.039(5) -0.004(5)
C143 0.054(5) 0.070(6) 0.066(6) -0.023(5) 0.026(4) -0.015(4)
C144 0.046(4) 0.055(5) 0.047(5) -0.022(4) 0.015(4) -0.009(4)
C145 0.045(4) 0.026(3) 0.027(3) -0.004(3) 0.001(3) -0.003(3)
C146 0.049(5) 0.030(4) 0.086(6) -0.014(4) -0.024(4) 0.007(3)
C147 0.054(5) 0.040(5) 0.092(7) -0.020(5) -0.031(5) 0.001(4)
C148 0.058(5) 0.033(4) 0.054(5) -0.011(4) -0.002(4) -0.006(4)
C149 0.039(4) 0.027(4) 0.066(5) -0.006(3) 0.022(4) -0.001(3)
C150 0.025(3) 0.040(4) 0.046(4) -0.006(3) 0.011(3) -0.003(3)
C151 0.026(3) 0.030(3) 0.032(3) 0.001(3) -0.004(3) -0.008(3)
C152 0.023(3) 0.023(3) 0.033(3) 0.001(3) 0.001(3) -0.004(2)
C153 0.034(4) 0.031(4) 0.038(4) -0.003(3) 0.006(3) -0.008(3)
C154 0.030(3) 0.050(4) 0.031(4) -0.011(3) 0.004(3) -0.006(3)
C155 0.036(4) 0.042(4) 0.037(4) 0.006(3) -0.002(3) -0.006(3)
C156 0.037(4) 0.033(4) 0.038(4) 0.001(3) -0.005(3) -0.001(3)
C157 0.044(4) 0.028(4) 0.042(4) 0.008(3) -0.016(3) -0.011(3)
C158 0.040(4) 0.045(4) 0.045(4) 0.012(3) -0.013(3) -0.012(3)
C159 0.056(5) 0.067(6) 0.051(5) 0.026(4) -0.012(4) -0.022(4)
C160 0.089(7) 0.057(6) 0.067(6) 0.026(5) -0.040(6) -0.052(5)
C161 0.122(10) 0.045(6) 0.082(8) 0.001(5) 0.003(7) -0.041(6)
C162 0.081(6) 0.037(4) 0.056(5) -0.009(4) 0.000(5) -0.020(4)
P200 0.162(7) 0.133(5) 0.392(14) 0.041(8) 0.000(7) -0.059(5)
F201 1.35(10) 0.145(15) 0.45(4) -0.13(2) -0.17(5) 0.18(3)
F202 0.146(11) 0.57(4) 0.30(2) 0.02(2) -0.008(12) -0.142(18)
F203 0.31(2) 0.29(2) 0.81(6) 0.35(3) 0.22(3) 0.024(18)
F204 0.28(2) 0.247(18) 0.30(2) 0.012(16) -0.063(16) -0.023(15)
F205 0.153(16) 0.33(3) 1.48(11) 0.22(5) 0.13(3) 0.068(18)
F206 0.40(3) 0.189(18) 0.81(6) -0.18(3) 0.07(4) 0.008(19)
 
_geom_special_details
;
 All esds (except the esd in the dihedral angle between two l.s. planes)
 are estimated using the full covariance matrix.  The cell esds are taken
 into account individually in the estimation of esds in distances, angles
 and torsion angles; correlations between esds in cell parameters are only
 used when they are defined by crystal symmetry.  An approximate (isotropic)
 treatment of cell esds is used for estimating esds involving l.s. planes.
;
 
loop_
 _geom_bond_atom_site_label_1
 _geom_bond_atom_site_label_2
 _geom_bond_distance
 _geom_bond_site_symmetry_2
 _geom_bond_publ_flag
Ru1 C1 2.005(6) . ?
Ru1 C17 2.233(7) . ?
Ru1 C19 2.236(6) . ?
Ru1 C18 2.243(7) . ?
Ru1 P7 2.2488(17) . ?
Ru1 C16 2.252(6) . ?
Ru1 P6 2.2528(17) . ?
Ru1 C20 2.254(6) . ?
Ru2 C8 1.999(6) . ?
Ru2 C131 2.220(6) . ?
Ru2 C127 2.229(7) . ?
Ru2 P14 2.2385(18) . ?
Ru2 C130 2.252(6) . ?
Ru2 P15 2.2754(17) . ?
Ru2 C128 2.291(7) . ?
Ru2 C129 2.292(6) . ?
Cu3 C5 2.130(6) . ?
Cu3 C4 2.230(6) . ?
Cu3 P13 2.2665(17) . ?
Cu3 P8 2.2705(17) . ?
Cu3 Cu4 2.5082(10) . ?
Cu3 Cu5 2.6484(10) . ?
Cu4 C5 2.082(6) . ?
Cu4 C4 2.225(6) . ?
Cu4 P9 2.2514(17) . ?
Cu4 P10 2.2555(18) . ?
Cu4 Cu5 2.6164(10) . ?
Cu5 C4 2.101(6) . ?
Cu5 P12 2.2804(17) . ?
Cu5 P11 2.2985(17) . ?
Cu5 C5 2.316(6) . ?
C1 C2 1.230(8) . ?
C2 C3 1.385(8) . ?
C3 C4 1.208(8) . ?
C5 C6 1.220(8) . ?
P6 C34 1.808(7) . ?
P6 C26 1.846(6) . ?
P6 C28 1.851(7) . ?
C6 C7 1.367(8) . ?
P7 C40 1.837(6) . ?
P7 C46 1.839(7) . ?
P7 C27 1.846(6) . ?
C7 C8 1.218(8) . ?
P8 C52 1.825(6) . ?
P8 C53 1.831(6) . ?
P8 C59 1.840(6) . ?
P9 C65 1.814(6) . ?
P9 C71 1.844(6) . ?
P9 C52 1.848(6) . ?
P10 C77 1.804(6) . ?
P10 C84 1.822(7) . ?
P10 C78 1.846(7) . ?
P11 C96 1.813(6) . ?
P11 C90 1.820(6) . ?
P11 C77 1.859(6) . ?
P12 C103 1.803(7) . ?
P12 C102 1.843(6) . ?
P12 C109 1.854(6) . ?
P13 C102 1.804(6) . ?
P13 C115 1.837(7) . ?
P13 C121 1.839(6) . ?
P14 C139 1.821(7) . ?
P14 C145 1.827(6) . ?
P14 C137 1.858(7) . ?
P15 C157 1.830(7) . ?
P15 C151 1.856(7) . ?
P15 C138 1.877(7) . ?
C16 C20 1.396(9) . ?
C16 C17 1.430(10) . ?
C16 C21 1.514(9) . ?
C17 C18 1.417(10) . ?
C17 C22 1.491(10) . ?
C18 C19 1.417(11) . ?
C18 C23 1.514(10) . ?
C19 C20 1.461(10) . ?
C19 C24 1.494(10) . ?
C20 C25 1.516(10) . ?
C21 H21A 0.9800 . ?
C21 H21B 0.9800 . ?
C21 H21C 0.9800 . ?
C22 H22A 0.9800 . ?
C22 H22B 0.9800 . ?
C22 H22C 0.9800 . ?
C23 H23A 0.9800 . ?
C23 H23B 0.9800 . ?
C23 H23C 0.9800 . ?
C24 H24A 0.9800 . ?
C24 H24B 0.9800 . ?
C24 H24C 0.9800 . ?
C25 H25A 0.9800 . ?
C25 H25B 0.9800 . ?
C25 H25C 0.9800 . ?
C26 C27 1.540(9) . ?
C28 C33 1.374(9) . ?
C28 C29 1.384(10) . ?
C29 C30 1.410(11) . ?
C29 H29 0.9500 . ?
C30 C31 1.361(12) . ?
C30 H30 0.9500 . ?
C31 C32 1.369(11) . ?
C31 H31 0.9500 . ?
C32 C33 1.395(10) . ?
C32 H32 0.9500 . ?
C33 H33 0.9500 . ?
C34 C39 1.380(9) . ?
C34 C35 1.394(10) . ?
C35 C36 1.363(10) . ?
C35 H35 0.9500 . ?
C36 C37 1.391(11) . ?
C36 H36 0.9500 . ?
C37 C38 1.371(12) . ?
C37 H37 0.9500 . ?
C38 C39 1.367(11) . ?
C38 H38 0.9500 . ?
C39 H39 0.9500 . ?
C40 C41 1.384(9) . ?
C40 C45 1.399(9) . ?
C41 C42 1.407(10) . ?
C41 H41 0.9500 . ?
C42 C43 1.387(11) . ?
C42 H42 0.9500 . ?
C43 C44 1.370(10) . ?
C43 H43 0.9500 . ?
C44 C45 1.395(9) . ?
C44 H44 0.9500 . ?
C45 H45 0.9500 . ?
C46 C47 1.361(10) . ?
C46 C51 1.401(10) . ?
C47 C48 1.384(11) . ?
C47 H47 0.9500 . ?
C48 C49 1.406(13) . ?
C48 H48 0.9500 . ?
C49 C50 1.349(13) . ?
C49 H49 0.9500 . ?
C50 C51 1.367(11) . ?
C50 H50 0.9500 . ?
C51 H51 0.9500 . ?
C52 H52A 0.9900 . ?
C52 H52B 0.9900 . ?
C53 C54 1.400(9) . ?
C53 C58 1.402(9) . ?
C54 C55 1.404(9) . ?
C54 H54 0.9500 . ?
C55 C56 1.365(10) . ?
C55 H55 0.9500 . ?
C56 C57 1.385(10) . ?
C56 H56 0.9500 . ?
C57 C58 1.393(9) . ?
C57 H57 0.9500 . ?
C58 H58 0.9500 . ?
C59 C64 1.371(9) . ?
C59 C60 1.385(9) . ?
C60 C61 1.401(9) . ?
C60 H60 0.9500 . ?
C61 C62 1.357(11) . ?
C61 H61 0.9500 . ?
C62 C63 1.385(11) . ?
C62 H62 0.9500 . ?
C63 C64 1.391(10) . ?
C63 H63 0.9500 . ?
C64 H64 0.9500 . ?
C65 C66 1.395(9) . ?
C65 C70 1.401(9) . ?
C66 C67 1.382(10) . ?
C66 H66 0.9500 . ?
C67 C68 1.396(11) . ?
C67 H67 0.9500 . ?
C68 C69 1.372(11) . ?
C68 H68 0.9500 . ?
C69 C70 1.386(9) . ?
C69 H69 0.9500 . ?
C70 H70 0.9500 . ?
C71 C72 1.370(9) . ?
C71 C76 1.377(9) . ?
C72 C73 1.402(9) . ?
C72 H72 0.9500 . ?
C73 C74 1.353(11) . ?
C73 H73 0.9500 . ?
C74 C75 1.370(11) . ?
C74 H74 0.9500 . ?
C75 C76 1.400(9) . ?
C75 H75 0.9500 . ?
C76 H76 0.9500 . ?
C77 H77A 0.9900 . ?
C77 H77B 0.9900 . ?
C78 C79 1.383(10) . ?
C78 C83 1.393(10) . ?
C79 C80 1.413(10) . ?
C79 H79 0.9500 . ?
C80 C81 1.357(11) . ?
C80 H80 0.9500 . ?
C81 C82 1.377(12) . ?
C81 H81 0.9500 . ?
C82 C83 1.403(10) . ?
C82 H82 0.9500 . ?
C83 H83 0.9500 . ?
C84 C85 1.388(10) . ?
C84 C89 1.388(10) . ?
C85 C86 1.391(11) . ?
C85 H85 0.9500 . ?
C86 C87 1.371(13) . ?
C86 H86 0.9500 . ?
C87 C88 1.372(13) . ?
C87 H87 0.9500 . ?
C88 C89 1.387(10) . ?
C88 H88 0.9500 . ?
C89 H89 0.9500 . ?
C90 C95 1.396(10) . ?
C90 C91 1.396(10) . ?
C91 C92 1.381(10) . ?
C91 H91 0.9500 . ?
C92 C93 1.385(12) . ?
C92 H92 0.9500 . ?
C93 C94 1.363(12) . ?
C93 H93 0.9500 . ?
C94 C95 1.390(9) . ?
C94 H94 0.9500 . ?
C95 H95 0.9500 . ?
C96 C101 1.380(9) . ?
C96 C97 1.390(9) . ?
C97 C98 1.344(10) . ?
C97 H97 0.9500 . ?
C98 C99 1.389(11) . ?
C98 H98 0.9500 . ?
C99 C100 1.376(12) . ?
C99 H99 0.9500 . ?
C100 C101 1.368(11) . ?
C100 H100 0.9500 . ?
C101 H101 0.9500 . ?
C102 H10A 0.9900 . ?
C102 H10B 0.9900 . ?
C103 C108 1.377(10) . ?
C103 C104 1.389(9) . ?
C104 C105 1.376(10) . ?
C104 H104 0.9500 . ?
C105 C106 1.363(13) . ?
C105 H105 0.9500 . ?
C106 C107 1.357(12) . ?
C106 H106 0.9500 . ?
C107 C108 1.377(10) . ?
C107 H107 0.9500 . ?
C108 H108 0.9500 . ?
C109 C114 1.374(9) . ?
C109 C110 1.394(9) . ?
C110 C111 1.410(10) . ?
C110 H110 0.9500 . ?
C111 C112 1.351(10) . ?
C111 H111 0.9500 . ?
C112 C113 1.368(10) . ?
C112 H112 0.9500 . ?
C113 C114 1.403(9) . ?
C113 H113 0.9500 . ?
C114 H114 0.9500 . ?
C115 C116 1.377(9) . ?
C115 C120 1.392(9) . ?
C116 C117 1.388(9) . ?
C116 H116 0.9500 . ?
C117 C118 1.378(9) . ?
C117 H117 0.9500 . ?
C118 C119 1.372(10) . ?
C118 H118 0.9500 . ?
C119 C120 1.388(9) . ?
C119 H119 0.9500 . ?
C120 H120 0.9500 . ?
C121 C122 1.387(9) . ?
C121 C126 1.403(8) . ?
C122 C123 1.390(8) . ?
C122 H122 0.9500 . ?
C123 C124 1.378(10) . ?
C123 H123 0.9500 . ?
C124 C125 1.378(10) . ?
C124 H124 0.9500 . ?
C125 C126 1.398(9) . ?
C125 H125 0.9500 . ?
C126 H126 0.9500 . ?
C127 C128 1.411(10) . ?
C127 C131 1.443(10) . ?
C127 C132 1.494(10) . ?
C128 C129 1.441(11) . ?
C128 C133 1.509(11) . ?
C129 C130 1.421(10) . ?
C129 C134 1.491(10) . ?
C130 C131 1.410(9) . ?
C130 C135 1.501(11) . ?
C131 C136 1.488(9) . ?
C132 H13A 0.9800 . ?
C132 H13B 0.9800 . ?
C132 H13C 0.9800 . ?
C133 H13D 0.9800 . ?
C133 H13E 0.9800 . ?
C133 H13F 0.9800 . ?
C134 H13G 0.9800 . ?
C134 H13H 0.9800 . ?
C134 H13I 0.9800 . ?
C135 H13J 0.9800 . ?
C135 H13K 0.9800 . ?
C135 H13L 0.9800 . ?
C136 H13M 0.9800 . ?
C136 H13N 0.9800 . ?
C136 H13O 0.9800 . ?
C137 C138 1.525(11) . ?
C139 C144 1.380(10) . ?
C139 C140 1.391(10) . ?
C140 C141 1.388(11) . ?
C140 H140 0.9500 . ?
C141 C142 1.382(12) . ?
C141 H141 0.9500 . ?
C142 C143 1.386(12) . ?
C142 H142 0.9500 . ?
C143 C144 1.374(11) . ?
C143 H143 0.9500 . ?
C144 H144 0.9500 . ?
C145 C150 1.354(9) . ?
C145 C146 1.397(10) . ?
C146 C147 1.384(10) . ?
C146 H146 0.9500 . ?
C147 C148 1.373(11) . ?
C147 H147 0.9500 . ?
C148 C149 1.367(10) . ?
C148 H148 0.9500 . ?
C149 C150 1.389(9) . ?
C149 H149 0.9500 . ?
C150 H150 0.9500 . ?
C151 C152 1.381(9) . ?
C151 C156 1.386(9) . ?
C152 C153 1.392(9) . ?
C152 H152 0.9500 . ?
C153 C154 1.377(10) . ?
C153 H153 0.9500 . ?
C154 C155 1.371(10) . ?
C154 H154 0.9500 . ?
C155 C156 1.390(10) . ?
C155 H155 0.9500 . ?
C156 H156 0.9500 . ?
C157 C162 1.364(10) . ?
C157 C158 1.383(11) . ?
C158 C159 1.394(10) . ?
C158 H158 0.9500 . ?
C159 C160 1.371(13) . ?
C159 H159 0.9500 . ?
C160 C161 1.347(15) . ?
C160 H160 0.9500 . ?
C161 C162 1.379(13) . ?
C161 H161 0.9500 . ?
C162 H162 0.9500 . ?
P200 F202 1.442(14) . ?
P200 F201 1.52(2) . ?
P200 F205 1.56(2) . ?
P200 F204 1.635(19) . ?
P200 F203 1.64(3) . ?
P200 F206 1.706(15) . ?
C219 O221 1.208(12) . ?
C219 C218 1.437(15) . ?
C219 C220 1.448(16) . ?
C210 C211 1.37(4) . ?
C210 H21D 0.9800 . ?
C210 H21E 0.9800 . ?
C210 H21F 0.9800 . ?
C211 O213 1.20(3) . ?
C211 C212 1.398(18) . ?
C212 H21G 0.9800 . ?
C212 H21H 0.9800 . ?
C212 H21I 0.9800 . ?
C214 C216 1.36(4) . ?
C214 H21J 0.9800 . ?
C214 H21K 0.9800 . ?
C214 H21L 0.9800 . ?
C215 C216 1.449(14) . ?
C215 H21X 0.9800 . ?
C215 H21Z 0.9800 . ?
C215 H21Y 0.9800 . ?
C216 O217 1.10(3) . ?
C216 C217 1.35(3) . ?
C217 H21M 0.9800 . ?
C217 H21N 0.9800 . ?
C217 H21O 0.9800 . ?
C218 H21P 0.9800 . ?
C218 H21Q 0.9800 . ?
C218 H21R 0.9800 . ?
C220 H22D 0.9800 . ?
C220 H22E 0.9800 . ?
C220 H22F 0.9800 . ?
C222 C223 1.457(17) . ?
C222 H22G 0.9800 . ?
C222 H22H 0.9800 . ?
C222 H22I 0.9800 . ?
C223 C224 1.20(3) . ?
C223 O225 1.21(2) . ?
C224 H22J 0.9800 . ?
C224 H22K 0.9800 . ?
C224 H22L 0.9800 . ?
C226 C227 1.304(17) . ?
C226 H22M 0.9800 . ?
C226 H22N 0.9800 . ?
C226 H22O 0.9800 . ?
C227 O229 1.30(2) . ?
C227 C228 1.30(2) . ?
C228 H22P 0.9800 . ?
C228 H22Q 0.9800 . ?
C228 H22R 0.9800 . ?
C230 C231 1.26(3) . ?
C230 H23D 0.9800 . ?
C230 H23E 0.9800 . ?
C230 H23F 0.9800 . ?
C231 O233 1.18(2) . ?
C231 C232 1.427(19) . ?
C232 H23G 0.9800 . ?
C232 H23H 0.9800 . ?
C232 H23I 0.9800 . ?
C234 C235 1.339(18) . ?
C234 H23J 0.9800 . ?
C234 H23K 0.9800 . ?
C234 H23L 0.9800 . ?
C235 O237 1.258(19) . ?
C235 C236 1.42(3) . ?
C236 H23M 0.9800 . ?
C236 H23N 0.9800 . ?
C236 H23O 0.9800 . ?
 
loop_
 _geom_angle_atom_site_label_1
 _geom_angle_atom_site_label_2
 _geom_angle_atom_site_label_3
 _geom_angle
 _geom_angle_site_symmetry_1
 _geom_angle_site_symmetry_3
 _geom_angle_publ_flag
C1 Ru1 C17 101.4(3) . . ?
C1 Ru1 C19 115.6(3) . . ?
C17 Ru1 C19 61.3(2) . . ?
C1 Ru1 C18 90.5(3) . . ?
C17 Ru1 C18 36.9(3) . . ?
C19 Ru1 C18 36.9(3) . . ?
C1 Ru1 P7 83.65(18) . . ?
C17 Ru1 P7 166.89(19) . . ?
C19 Ru1 P7 105.55(18) . . ?
C18 Ru1 P7 131.98(19) . . ?
C1 Ru1 C16 137.2(3) . . ?
C17 Ru1 C16 37.2(2) . . ?
C19 Ru1 C16 62.0(2) . . ?
C18 Ru1 C16 62.3(2) . . ?
P7 Ru1 C16 139.16(19) . . ?
C1 Ru1 P6 86.44(18) . . ?
C17 Ru1 P6 111.62(19) . . ?
C19 Ru1 P6 157.4(2) . . ?
C18 Ru1 P6 146.8(2) . . ?
P7 Ru1 P6 80.57(6) . . ?
C16 Ru1 P6 98.94(17) . . ?
C1 Ru1 C20 152.1(3) . . ?
C17 Ru1 C20 61.1(2) . . ?
C19 Ru1 C20 38.0(3) . . ?
C18 Ru1 C20 62.3(3) . . ?
P7 Ru1 C20 109.25(18) . . ?
C16 Ru1 C20 36.1(2) . . ?
P6 Ru1 C20 119.42(18) . . ?
C8 Ru2 C131 87.0(2) . . ?
C8 Ru2 C127 94.7(2) . . ?
C131 Ru2 C127 37.9(3) . . ?
C8 Ru2 P14 88.06(18) . . ?
C131 Ru2 P14 148.09(19) . . ?
C127 Ru2 P14 111.5(2) . . ?
C8 Ru2 C130 115.0(3) . . ?
C131 Ru2 C130 36.8(2) . . ?
C127 Ru2 C130 62.3(3) . . ?
P14 Ru2 C130 156.0(2) . . ?
C8 Ru2 P15 88.98(18) . . ?
C131 Ru2 P15 129.32(19) . . ?
C127 Ru2 P15 166.1(2) . . ?
P14 Ru2 P15 82.06(6) . . ?
C130 Ru2 P15 103.94(19) . . ?
C8 Ru2 C128 129.7(3) . . ?
C131 Ru2 C128 61.3(2) . . ?
C127 Ru2 C128 36.3(3) . . ?
P14 Ru2 C128 99.3(2) . . ?
C130 Ru2 C128 61.3(3) . . ?
P15 Ru2 C128 141.2(2) . . ?
C8 Ru2 C129 147.9(2) . . ?
C131 Ru2 C129 60.9(2) . . ?
C127 Ru2 C129 61.4(3) . . ?
P14 Ru2 C129 119.5(2) . . ?
C130 Ru2 C129 36.4(3) . . ?
P15 Ru2 C129 109.62(19) . . ?
C128 Ru2 C129 36.7(3) . . ?
C5 Cu3 C4 93.5(2) . . ?
C5 Cu3 P13 108.15(17) . . ?
C4 Cu3 P13 116.83(16) . . ?
C5 Cu3 P8 120.84(16) . . ?
C4 Cu3 P8 109.15(16) . . ?
P13 Cu3 P8 108.28(6) . . ?
C5 Cu3 Cu4 52.59(16) . . ?
C4 Cu3 Cu4 55.64(15) . . ?
P13 Cu3 Cu4 154.18(5) . . ?
P8 Cu3 Cu4 97.20(5) . . ?
C5 Cu3 Cu5 56.75(15) . . ?
C4 Cu3 Cu5 50.12(16) . . ?
P13 Cu3 Cu5 94.79(5) . . ?
P8 Cu3 Cu5 155.25(5) . . ?
Cu4 Cu3 Cu5 60.91(3) . . ?
C5 Cu4 C4 95.0(2) . . ?
C5 Cu4 P9 121.39(17) . . ?
C4 Cu4 P9 106.28(16) . . ?
C5 Cu4 P10 106.90(18) . . ?
C4 Cu4 P10 121.71(15) . . ?
P9 Cu4 P10 106.47(7) . . ?
C5 Cu4 Cu3 54.33(17) . . ?
C4 Cu4 Cu3 55.83(14) . . ?
P9 Cu4 Cu3 94.92(5) . . ?
P10 Cu4 Cu3 157.54(6) . . ?
C5 Cu4 Cu5 57.73(16) . . ?
C4 Cu4 Cu5 50.64(16) . . ?
P9 Cu4 Cu5 153.42(6) . . ?
P10 Cu4 Cu5 98.27(5) . . ?
Cu3 Cu4 Cu5 62.19(3) . . ?
C4 Cu5 P12 119.17(17) . . ?
C4 Cu5 P11 115.06(16) . . ?
P12 Cu5 P11 115.07(6) . . ?
C4 Cu5 C5 91.8(2) . . ?
P12 Cu5 C5 105.37(16) . . ?
P11 Cu5 C5 105.81(16) . . ?
C4 Cu5 Cu4 54.97(16) . . ?
P12 Cu5 Cu4 149.16(5) . . ?
P11 Cu5 Cu4 91.60(5) . . ?
C5 Cu5 Cu4 49.48(15) . . ?
C4 Cu5 Cu3 54.54(15) . . ?
P12 Cu5 Cu3 94.07(5) . . ?
P11 Cu5 Cu3 147.83(5) . . ?
C5 Cu5 Cu3 50.26(15) . . ?
Cu4 Cu5 Cu3 56.90(3) . . ?
C2 C1 Ru1 179.0(6) . . ?
C1 C2 C3 175.0(7) . . ?
C4 C3 C2 178.4(7) . . ?
C3 C4 Cu5 142.8(5) . . ?
C3 C4 Cu4 132.7(5) . . ?
Cu5 C4 Cu4 74.38(19) . . ?
C3 C4 Cu3 133.2(5) . . ?
Cu5 C4 Cu3 75.34(19) . . ?
Cu4 C4 Cu3 68.54(16) . . ?
C6 C5 Cu4 148.6(5) . . ?
C6 C5 Cu3 138.2(5) . . ?
Cu4 C5 Cu3 73.08(19) . . ?
C6 C5 Cu5 113.7(4) . . ?
Cu4 C5 Cu5 72.78(18) . . ?
Cu3 C5 Cu5 72.99(18) . . ?
C34 P6 C26 105.2(3) . . ?
C34 P6 C28 102.0(3) . . ?
C26 P6 C28 101.3(3) . . ?
C34 P6 Ru1 117.3(2) . . ?
C26 P6 Ru1 108.1(2) . . ?
C28 P6 Ru1 121.0(2) . . ?
C5 C6 C7 176.0(6) . . ?
C40 P7 C46 100.7(3) . . ?
C40 P7 C27 102.2(3) . . ?
C46 P7 C27 104.7(3) . . ?
C40 P7 Ru1 119.7(2) . . ?
C46 P7 Ru1 118.0(2) . . ?
C27 P7 Ru1 109.6(2) . . ?
C8 C7 C6 171.5(6) . . ?
C52 P8 C53 105.7(3) . . ?
C52 P8 C59 103.2(3) . . ?
C53 P8 C59 100.9(3) . . ?
C52 P8 Cu3 107.0(2) . . ?
C53 P8 Cu3 115.05(19) . . ?
C59 P8 Cu3 123.3(2) . . ?
C7 C8 Ru2 165.9(5) . . ?
C65 P9 C71 103.6(3) . . ?
C65 P9 C52 101.7(3) . . ?
C71 P9 C52 105.6(3) . . ?
C65 P9 Cu4 118.9(2) . . ?
C71 P9 Cu4 115.6(2) . . ?
C52 P9 Cu4 109.7(2) . . ?
C77 P10 C84 104.1(3) . . ?
C77 P10 C78 102.9(3) . . ?
C84 P10 C78 103.2(3) . . ?
C77 P10 Cu4 109.6(2) . . ?
C84 P10 Cu4 120.7(2) . . ?
C78 P10 Cu4 114.4(2) . . ?
C96 P11 C90 104.0(3) . . ?
C96 P11 C77 97.5(3) . . ?
C90 P11 C77 105.5(3) . . ?
C96 P11 Cu5 124.5(2) . . ?
C90 P11 Cu5 112.2(2) . . ?
C77 P11 Cu5 110.9(2) . . ?
C103 P12 C102 102.5(3) . . ?
C103 P12 C109 100.7(3) . . ?
C102 P12 C109 102.7(3) . . ?
C103 P12 Cu5 118.2(2) . . ?
C102 P12 Cu5 109.87(19) . . ?
C109 P12 Cu5 120.5(2) . . ?
C102 P13 C115 105.5(3) . . ?
C102 P13 C121 102.8(3) . . ?
C115 P13 C121 102.4(3) . . ?
C102 P13 Cu3 109.6(2) . . ?
C115 P13 Cu3 123.1(2) . . ?
C121 P13 Cu3 111.40(19) . . ?
C139 P14 C145 101.5(3) . . ?
C139 P14 C137 104.9(3) . . ?
C145 P14 C137 103.0(3) . . ?
C139 P14 Ru2 121.3(2) . . ?
C145 P14 Ru2 117.8(2) . . ?
C137 P14 Ru2 106.3(2) . . ?
C157 P15 C151 98.4(3) . . ?
C157 P15 C138 103.6(4) . . ?
C151 P15 C138 100.3(3) . . ?
C157 P15 Ru2 116.2(2) . . ?
C151 P15 Ru2 124.8(2) . . ?
C138 P15 Ru2 110.6(3) . . ?
C20 C16 C17 107.7(6) . . ?
C20 C16 C21 125.7(7) . . ?
C17 C16 C21 125.7(7) . . ?
C20 C16 Ru1 72.0(4) . . ?
C17 C16 Ru1 70.7(3) . . ?
C21 C16 Ru1 131.0(5) . . ?
C18 C17 C16 109.5(6) . . ?
C18 C17 C22 125.6(8) . . ?
C16 C17 C22 124.5(7) . . ?
C18 C17 Ru1 71.9(4) . . ?
C16 C17 Ru1 72.1(4) . . ?
C22 C17 Ru1 128.0(5) . . ?
C19 C18 C17 107.0(6) . . ?
C19 C18 C23 126.0(8) . . ?
C17 C18 C23 126.8(8) . . ?
C19 C18 Ru1 71.3(4) . . ?
C17 C18 Ru1 71.1(4) . . ?
C23 C18 Ru1 126.4(5) . . ?
C18 C19 C20 107.9(6) . . ?
C18 C19 C24 125.7(8) . . ?
C20 C19 C24 125.9(8) . . ?
C18 C19 Ru1 71.8(4) . . ?
C20 C19 Ru1 71.7(4) . . ?
C24 C19 Ru1 128.7(5) . . ?
C16 C20 C19 107.9(6) . . ?
C16 C20 C25 123.9(7) . . ?
C19 C20 C25 127.3(7) . . ?
C16 C20 Ru1 71.9(4) . . ?
C19 C20 Ru1 70.3(3) . . ?
C25 C20 Ru1 132.3(5) . . ?
C16 C21 H21A 109.5 . . ?
C16 C21 H21B 109.5 . . ?
H21A C21 H21B 109.5 . . ?
C16 C21 H21C 109.5 . . ?
H21A C21 H21C 109.5 . . ?
H21B C21 H21C 109.5 . . ?
C17 C22 H22A 109.5 . . ?
C17 C22 H22B 109.5 . . ?
H22A C22 H22B 109.5 . . ?
C17 C22 H22C 109.5 . . ?
H22A C22 H22C 109.5 . . ?
H22B C22 H22C 109.5 . . ?
C18 C23 H23A 109.5 . . ?
C18 C23 H23B 109.5 . . ?
H23A C23 H23B 109.5 . . ?
C18 C23 H23C 109.5 . . ?
H23A C23 H23C 109.5 . . ?
H23B C23 H23C 109.5 . . ?
C19 C24 H24A 109.5 . . ?
C19 C24 H24B 109.5 . . ?
H24A C24 H24B 109.5 . . ?
C19 C24 H24C 109.5 . . ?
H24A C24 H24C 109.5 . . ?
H24B C24 H24C 109.5 . . ?
C20 C25 H25A 109.5 . . ?
C20 C25 H25B 109.5 . . ?
H25A C25 H25B 109.5 . . ?
C20 C25 H25C 109.5 . . ?
H25A C25 H25C 109.5 . . ?
H25B C25 H25C 109.5 . . ?
C27 C26 P6 111.9(4) . . ?
C26 C27 P7 111.6(4) . . ?
C33 C28 C29 117.6(6) . . ?
C33 C28 P6 119.9(5) . . ?
C29 C28 P6 122.4(5) . . ?
C28 C29 C30 120.9(7) . . ?
C28 C29 H29 119.5 . . ?
C30 C29 H29 119.5 . . ?
C31 C30 C29 120.5(8) . . ?
C31 C30 H30 119.8 . . ?
C29 C30 H30 119.8 . . ?
C30 C31 C32 118.7(7) . . ?
C30 C31 H31 120.6 . . ?
C32 C31 H31 120.6 . . ?
C31 C32 C33 121.2(7) . . ?
C31 C32 H32 119.4 . . ?
C33 C32 H32 119.4 . . ?
C28 C33 C32 121.0(7) . . ?
C28 C33 H33 119.5 . . ?
C32 C33 H33 119.5 . . ?
C39 C34 C35 118.7(7) . . ?
C39 C34 P6 123.1(6) . . ?
C35 C34 P6 118.1(5) . . ?
C36 C35 C34 120.5(7) . . ?
C36 C35 H35 119.7 . . ?
C34 C35 H35 119.7 . . ?
C35 C36 C37 119.5(8) . . ?
C35 C36 H36 120.3 . . ?
C37 C36 H36 120.3 . . ?
C38 C37 C36 120.6(7) . . ?
C38 C37 H37 119.7 . . ?
C36 C37 H37 119.7 . . ?
C39 C38 C37 119.4(7) . . ?
C39 C38 H38 120.3 . . ?
C37 C38 H38 120.3 . . ?
C38 C39 C34 121.2(8) . . ?
C38 C39 H39 119.4 . . ?
C34 C39 H39 119.4 . . ?
C41 C40 C45 118.5(6) . . ?
C41 C40 P7 119.9(5) . . ?
C45 C40 P7 121.6(5) . . ?
C40 C41 C42 119.3(7) . . ?
C40 C41 H41 120.3 . . ?
C42 C41 H41 120.3 . . ?
C43 C42 C41 121.6(7) . . ?
C43 C42 H42 119.2 . . ?
C41 C42 H42 119.2 . . ?
C44 C43 C42 118.9(7) . . ?
C44 C43 H43 120.5 . . ?
C42 C43 H43 120.5 . . ?
C43 C44 C45 120.1(7) . . ?
C43 C44 H44 119.9 . . ?
C45 C44 H44 119.9 . . ?
C44 C45 C40 121.4(6) . . ?
C44 C45 H45 119.3 . . ?
C40 C45 H45 119.3 . . ?
C47 C46 C51 118.9(7) . . ?
C47 C46 P7 117.3(5) . . ?
C51 C46 P7 123.7(6) . . ?
C46 C47 C48 120.2(8) . . ?
C46 C47 H47 119.9 . . ?
C48 C47 H47 119.9 . . ?
C47 C48 C49 119.8(9) . . ?
C47 C48 H48 120.1 . . ?
C49 C48 H48 120.1 . . ?
C50 C49 C48 119.9(8) . . ?
C50 C49 H49 120.1 . . ?
C48 C49 H49 120.1 . . ?
C49 C50 C51 120.1(8) . . ?
C49 C50 H50 120.0 . . ?
C51 C50 H50 120.0 . . ?
C50 C51 C46 121.1(8) . . ?
C50 C51 H51 119.4 . . ?
C46 C51 H51 119.4 . . ?
P8 C52 P9 108.8(3) . . ?
P8 C52 H52A 109.9 . . ?
P9 C52 H52A 109.9 . . ?
P8 C52 H52B 109.9 . . ?
P9 C52 H52B 109.9 . . ?
H52A C52 H52B 108.3 . . ?
C54 C53 C58 118.9(6) . . ?
C54 C53 P8 124.2(5) . . ?
C58 C53 P8 116.6(5) . . ?
C53 C54 C55 118.8(6) . . ?
C53 C54 H54 120.6 . . ?
C55 C54 H54 120.6 . . ?
C56 C55 C54 122.2(7) . . ?
C56 C55 H55 118.9 . . ?
C54 C55 H55 118.9 . . ?
C55 C56 C57 119.3(7) . . ?
C55 C56 H56 120.4 . . ?
C57 C56 H56 120.4 . . ?
C56 C57 C58 120.2(6) . . ?
C56 C57 H57 119.9 . . ?
C58 C57 H57 119.9 . . ?
C57 C58 C53 120.7(6) . . ?
C57 C58 H58 119.6 . . ?
C53 C58 H58 119.6 . . ?
C64 C59 C60 118.2(6) . . ?
C64 C59 P8 121.0(5) . . ?
C60 C59 P8 120.8(5) . . ?
C59 C60 C61 121.1(6) . . ?
C59 C60 H60 119.4 . . ?
C61 C60 H60 119.4 . . ?
C62 C61 C60 119.8(7) . . ?
C62 C61 H61 120.1 . . ?
C60 C61 H61 120.1 . . ?
C61 C62 C63 119.9(7) . . ?
C61 C62 H62 120.1 . . ?
C63 C62 H62 120.1 . . ?
C62 C63 C64 120.0(7) . . ?
C62 C63 H63 120.0 . . ?
C64 C63 H63 120.0 . . ?
C59 C64 C63 121.0(7) . . ?
C59 C64 H64 119.5 . . ?
C63 C64 H64 119.5 . . ?
C66 C65 C70 119.5(6) . . ?
C66 C65 P9 122.2(5) . . ?
C70 C65 P9 118.1(5) . . ?
C67 C66 C65 120.5(6) . . ?
C67 C66 H66 119.7 . . ?
C65 C66 H66 119.7 . . ?
C66 C67 C68 119.0(7) . . ?
C66 C67 H67 120.5 . . ?
C68 C67 H67 120.5 . . ?
C69 C68 C67 121.3(7) . . ?
C69 C68 H68 119.4 . . ?
C67 C68 H68 119.4 . . ?
C68 C69 C70 119.8(7) . . ?
C68 C69 H69 120.1 . . ?
C70 C69 H69 120.1 . . ?
C69 C70 C65 119.9(6) . . ?
C69 C70 H70 120.1 . . ?
C65 C70 H70 120.1 . . ?
C72 C71 C76 118.7(6) . . ?
C72 C71 P9 118.0(5) . . ?
C76 C71 P9 123.3(5) . . ?
C71 C72 C73 120.0(7) . . ?
C71 C72 H72 120.0 . . ?
C73 C72 H72 120.0 . . ?
C74 C73 C72 121.4(7) . . ?
C74 C73 H73 119.3 . . ?
C72 C73 H73 119.3 . . ?
C73 C74 C75 118.9(7) . . ?
C73 C74 H74 120.5 . . ?
C75 C74 H74 120.5 . . ?
C74 C75 C76 120.3(7) . . ?
C74 C75 H75 119.8 . . ?
C76 C75 H75 119.8 . . ?
C71 C76 C75 120.6(7) . . ?
C71 C76 H76 119.7 . . ?
C75 C76 H76 119.7 . . ?
P10 C77 P11 110.6(3) . . ?
P10 C77 H77A 109.5 . . ?
P11 C77 H77A 109.5 . . ?
P10 C77 H77B 109.5 . . ?
P11 C77 H77B 109.5 . . ?
H77A C77 H77B 108.1 . . ?
C79 C78 C83 117.1(6) . . ?
C79 C78 P10 121.6(5) . . ?
C83 C78 P10 120.9(6) . . ?
C78 C79 C80 121.2(7) . . ?
C78 C79 H79 119.4 . . ?
C80 C79 H79 119.4 . . ?
C81 C80 C79 121.0(8) . . ?
C81 C80 H80 119.5 . . ?
C79 C80 H80 119.5 . . ?
C80 C81 C82 118.8(7) . . ?
C80 C81 H81 120.6 . . ?
C82 C81 H81 120.6 . . ?
C81 C82 C83 120.9(7) . . ?
C81 C82 H82 119.6 . . ?
C83 C82 H82 119.6 . . ?
C78 C83 C82 121.0(7) . . ?
C78 C83 H83 119.5 . . ?
C82 C83 H83 119.5 . . ?
C85 C84 C89 120.4(7) . . ?
C85 C84 P10 121.5(6) . . ?
C89 C84 P10 118.1(5) . . ?
C84 C85 C86 119.5(8) . . ?
C84 C85 H85 120.2 . . ?
C86 C85 H85 120.2 . . ?
C87 C86 C85 119.9(8) . . ?
C87 C86 H86 120.0 . . ?
C85 C86 H86 120.0 . . ?
C88 C87 C86 120.5(8) . . ?
C88 C87 H87 119.8 . . ?
C86 C87 H87 119.8 . . ?
C87 C88 C89 120.8(8) . . ?
C87 C88 H88 119.6 . . ?
C89 C88 H88 119.6 . . ?
C88 C89 C84 118.9(7) . . ?
C88 C89 H89 120.6 . . ?
C84 C89 H89 120.6 . . ?
C95 C90 C91 119.2(6) . . ?
C95 C90 P11 117.1(5) . . ?
C91 C90 P11 123.6(5) . . ?
C92 C91 C90 119.7(8) . . ?
C92 C91 H91 120.2 . . ?
C90 C91 H91 120.2 . . ?
C91 C92 C93 120.1(8) . . ?
C91 C92 H92 119.9 . . ?
C93 C92 H92 119.9 . . ?
C94 C93 C92 121.1(7) . . ?
C94 C93 H93 119.4 . . ?
C92 C93 H93 119.4 . . ?
C93 C94 C95 119.3(8) . . ?
C93 C94 H94 120.3 . . ?
C95 C94 H94 120.3 . . ?
C94 C95 C90 120.6(7) . . ?
C94 C95 H95 119.7 . . ?
C90 C95 H95 119.7 . . ?
C101 C96 C97 119.2(6) . . ?
C101 C96 P11 122.9(5) . . ?
C97 C96 P11 117.9(5) . . ?
C98 C97 C96 121.0(7) . . ?
C98 C97 H97 119.5 . . ?
C96 C97 H97 119.5 . . ?
C97 C98 C99 119.6(8) . . ?
C97 C98 H98 120.2 . . ?
C99 C98 H98 120.2 . . ?
C100 C99 C98 120.1(7) . . ?
C100 C99 H99 119.9 . . ?
C98 C99 H99 119.9 . . ?
C101 C100 C99 120.0(7) . . ?
C101 C100 H100 120.0 . . ?
C99 C100 H100 120.0 . . ?
C100 C101 C96 120.1(7) . . ?
C100 C101 H101 120.0 . . ?
C96 C101 H101 120.0 . . ?
P13 C102 P12 110.7(3) . . ?
P13 C102 H10A 109.5 . . ?
P12 C102 H10A 109.5 . . ?
P13 C102 H10B 109.5 . . ?
P12 C102 H10B 109.5 . . ?
H10A C102 H10B 108.1 . . ?
C108 C103 C104 119.4(6) . . ?
C108 C103 P12 124.4(5) . . ?
C104 C103 P12 116.2(5) . . ?
C105 C104 C103 119.9(8) . . ?
C105 C104 H104 120.1 . . ?
C103 C104 H104 120.1 . . ?
C106 C105 C104 119.6(8) . . ?
C106 C105 H105 120.2 . . ?
C104 C105 H105 120.2 . . ?
C107 C106 C105 121.3(8) . . ?
C107 C106 H106 119.3 . . ?
C105 C106 H106 119.3 . . ?
C106 C107 C108 119.8(8) . . ?
C106 C107 H107 120.1 . . ?
C108 C107 H107 120.1 . . ?
C107 C108 C103 120.1(7) . . ?
C107 C108 H108 120.0 . . ?
C103 C108 H108 120.0 . . ?
C114 C109 C110 117.3(6) . . ?
C114 C109 P12 120.0(5) . . ?
C110 C109 P12 122.7(5) . . ?
C109 C110 C111 120.6(7) . . ?
C109 C110 H110 119.7 . . ?
C111 C110 H110 119.7 . . ?
C112 C111 C110 121.3(7) . . ?
C112 C111 H111 119.3 . . ?
C110 C111 H111 119.3 . . ?
C111 C112 C113 118.3(7) . . ?
C111 C112 H112 120.8 . . ?
C113 C112 H112 120.8 . . ?
C112 C113 C114 121.5(7) . . ?
C112 C113 H113 119.2 . . ?
C114 C113 H113 119.2 . . ?
C109 C114 C113 120.8(6) . . ?
C109 C114 H114 119.6 . . ?
C113 C114 H114 119.6 . . ?
C116 C115 C120 117.1(6) . . ?
C116 C115 P13 118.3(5) . . ?
C120 C115 P13 124.3(5) . . ?
C115 C116 C117 120.9(6) . . ?
C115 C116 H116 119.6 . . ?
C117 C116 H116 119.6 . . ?
C118 C117 C116 121.7(6) . . ?
C118 C117 H117 119.1 . . ?
C116 C117 H117 119.1 . . ?
C119 C118 C117 117.9(6) . . ?
C119 C118 H118 121.1 . . ?
C117 C118 H118 121.1 . . ?
C118 C119 C120 120.6(6) . . ?
C118 C119 H119 119.7 . . ?
C120 C119 H119 119.7 . . ?
C119 C120 C115 121.8(6) . . ?
C119 C120 H120 119.1 . . ?
C115 C120 H120 119.1 . . ?
C122 C121 C126 119.4(5) . . ?
C122 C121 P13 123.3(5) . . ?
C126 C121 P13 117.2(4) . . ?
C121 C122 C123 119.8(6) . . ?
C121 C122 H122 120.1 . . ?
C123 C122 H122 120.1 . . ?
C124 C123 C122 120.8(6) . . ?
C124 C123 H123 119.6 . . ?
C122 C123 H123 119.6 . . ?
C125 C124 C123 120.1(6) . . ?
C125 C124 H124 120.0 . . ?
C123 C124 H124 120.0 . . ?
C124 C125 C126 120.0(6) . . ?
C124 C125 H125 120.0 . . ?
C126 C125 H125 120.0 . . ?
C125 C126 C121 119.9(6) . . ?
C125 C126 H126 120.0 . . ?
C121 C126 H126 120.0 . . ?
C128 C127 C131 107.3(6) . . ?
C128 C127 C132 125.5(7) . . ?
C131 C127 C132 127.1(7) . . ?
C128 C127 Ru2 74.2(4) . . ?
C131 C127 Ru2 70.7(4) . . ?
C132 C127 Ru2 123.3(5) . . ?
C127 C128 C129 108.0(6) . . ?
C127 C128 C133 124.0(8) . . ?
C129 C128 C133 127.2(7) . . ?
C127 C128 Ru2 69.5(4) . . ?
C129 C128 Ru2 71.7(4) . . ?
C133 C128 Ru2 132.3(5) . . ?
C130 C129 C128 108.1(6) . . ?
C130 C129 C134 123.7(8) . . ?
C128 C129 C134 127.5(7) . . ?
C130 C129 Ru2 70.3(3) . . ?
C128 C129 Ru2 71.6(4) . . ?
C134 C129 Ru2 131.4(5) . . ?
C131 C130 C129 107.8(6) . . ?
C131 C130 C135 125.6(7) . . ?
C129 C130 C135 126.1(7) . . ?
C131 C130 Ru2 70.4(3) . . ?
C129 C130 Ru2 73.3(4) . . ?
C135 C130 Ru2 128.0(5) . . ?
C130 C131 C127 108.8(6) . . ?
C130 C131 C136 126.2(7) . . ?
C127 C131 C136 124.8(6) . . ?
C130 C131 Ru2 72.8(4) . . ?
C127 C131 Ru2 71.4(4) . . ?
C136 C131 Ru2 126.2(5) . . ?
C127 C132 H13A 109.5 . . ?
C127 C132 H13B 109.5 . . ?
H13A C132 H13B 109.5 . . ?
C127 C132 H13C 109.5 . . ?
H13A C132 H13C 109.5 . . ?
H13B C132 H13C 109.5 . . ?
C128 C133 H13D 109.5 . . ?
C128 C133 H13E 109.5 . . ?
H13D C133 H13E 109.5 . . ?
C128 C133 H13F 109.5 . . ?
H13D C133 H13F 109.5 . . ?
H13E C133 H13F 109.5 . . ?
C129 C134 H13G 109.5 . . ?
C129 C134 H13H 109.5 . . ?
H13G C134 H13H 109.5 . . ?
C129 C134 H13I 109.5 . . ?
H13G C134 H13I 109.5 . . ?
H13H C134 H13I 109.5 . . ?
C130 C135 H13J 109.5 . . ?
C130 C135 H13K 109.5 . . ?
H13J C135 H13K 109.5 . . ?
C130 C135 H13L 109.5 . . ?
H13J C135 H13L 109.5 . . ?
H13K C135 H13L 109.5 . . ?
C131 C136 H13M 109.5 . . ?
C131 C136 H13N 109.5 . . ?
H13M C136 H13N 109.5 . . ?
C131 C136 H13O 109.5 . . ?
H13M C136 H13O 109.5 . . ?
H13N C136 H13O 109.5 . . ?
C138 C137 P14 106.7(5) . . ?
C137 C138 P15 109.6(5) . . ?
C144 C139 C140 117.7(7) . . ?
C144 C139 P14 119.7(5) . . ?
C140 C139 P14 122.5(5) . . ?
C141 C140 C139 121.0(8) . . ?
C141 C140 H140 119.5 . . ?
C139 C140 H140 119.5 . . ?
C142 C141 C140 119.7(8) . . ?
C142 C141 H141 120.2 . . ?
C140 C141 H141 120.2 . . ?
C141 C142 C143 119.9(8) . . ?
C141 C142 H142 120.0 . . ?
C143 C142 H142 120.0 . . ?
C144 C143 C142 119.4(8) . . ?
C144 C143 H143 120.3 . . ?
C142 C143 H143 120.3 . . ?
C143 C144 C139 122.2(7) . . ?
C143 C144 H144 118.9 . . ?
C139 C144 H144 118.9 . . ?
C150 C145 C146 118.9(6) . . ?
C150 C145 P14 121.3(5) . . ?
C146 C145 P14 119.6(5) . . ?
C147 C146 C145 121.6(7) . . ?
C147 C146 H146 119.2 . . ?
C145 C146 H146 119.2 . . ?
C148 C147 C146 117.9(7) . . ?
C148 C147 H147 121.1 . . ?
C146 C147 H147 121.1 . . ?
C149 C148 C147 121.1(7) . . ?
C149 C148 H148 119.4 . . ?
C147 C148 H148 119.4 . . ?
C148 C149 C150 120.2(7) . . ?
C148 C149 H149 119.9 . . ?
C150 C149 H149 119.9 . . ?
C145 C150 C149 120.1(6) . . ?
C145 C150 H150 119.9 . . ?
C149 C150 H150 119.9 . . ?
C152 C151 C156 117.5(6) . . ?
C152 C151 P15 121.8(5) . . ?
C156 C151 P15 120.6(5) . . ?
C151 C152 C153 119.7(6) . . ?
C151 C152 H152 120.1 . . ?
C153 C152 H152 120.1 . . ?
C154 C153 C152 122.6(6) . . ?
C154 C153 H153 118.7 . . ?
C152 C153 H153 118.7 . . ?
C155 C154 C153 117.9(6) . . ?
C155 C154 H154 121.1 . . ?
C153 C154 H154 121.1 . . ?
C154 C155 C156 120.1(7) . . ?
C154 C155 H155 120.0 . . ?
C156 C155 H155 120.0 . . ?
C151 C156 C155 122.3(7) . . ?
C151 C156 H156 118.9 . . ?
C155 C156 H156 118.9 . . ?
C162 C157 C158 118.6(7) . . ?
C162 C157 P15 121.2(7) . . ?
C158 C157 P15 120.0(5) . . ?
C157 C158 C159 120.3(8) . . ?
C157 C158 H158 119.8 . . ?
C159 C158 H158 119.8 . . ?
C160 C159 C158 119.2(9) . . ?
C160 C159 H159 120.4 . . ?
C158 C159 H159 120.4 . . ?
C161 C160 C159 120.5(8) . . ?
C161 C160 H160 119.7 . . ?
C159 C160 H160 119.7 . . ?
C160 C161 C162 120.4(10) . . ?
C160 C161 H161 119.8 . . ?
C162 C161 H161 119.8 . . ?
C157 C162 C161 120.9(10) . . ?
C157 C162 H162 119.5 . . ?
C161 C162 H162 119.5 . . ?
F202 P200 F201 95.0(14) . . ?
F202 P200 F205 155.1(18) . . ?
F201 P200 F205 107.1(19) . . ?
F202 P200 F204 93.5(11) . . ?
F201 P200 F204 83.6(16) . . ?
F205 P200 F204 100.2(16) . . ?
F202 P200 F203 82.2(12) . . ?
F201 P200 F203 94.7(14) . . ?
F205 P200 F203 84.5(16) . . ?
F204 P200 F203 175.2(12) . . ?
F202 P200 F206 78.1(13) . . ?
F201 P200 F206 173.1(17) . . ?
F205 P200 F206 79.7(10) . . ?
F204 P200 F206 96.7(13) . . ?
F203 P200 F206 84.4(17) . . ?
O221 C219 C218 120.1(11) . . ?
O221 C219 C220 117.7(11) . . ?
C218 C219 C220 122.0(11) . . ?
C211 C210 H21D 109.5 . . ?
C211 C210 H21E 109.5 . . ?
H21D C210 H21E 109.5 . . ?
C211 C210 H21F 109.5 . . ?
H21D C210 H21F 109.5 . . ?
H21E C210 H21F 109.5 . . ?
O213 C211 C210 122(3) . . ?
O213 C211 C212 124(4) . . ?
C210 C211 C212 114(3) . . ?
C211 C212 H21G 109.5 . . ?
C211 C212 H21H 109.5 . . ?
H21G C212 H21H 109.5 . . ?
C211 C212 H21I 109.5 . . ?
H21G C212 H21I 109.5 . . ?
H21H C212 H21I 109.5 . . ?
C216 C214 H21J 109.5 . . ?
C216 C214 H21K 109.5 . . ?
H21J C214 H21K 109.5 . . ?
C216 C214 H21L 109.5 . . ?
H21J C214 H21L 109.5 . . ?
H21K C214 H21L 109.5 . . ?
C216 C215 H21X 109.5 . . ?
C216 C215 H21Z 109.5 . . ?
H21X C215 H21Z 109.5 . . ?
C216 C215 H21Y 109.5 . . ?
H21X C215 H21Y 109.5 . . ?
H21Z C215 H21Y 109.5 . . ?
O217 C216 C217 121(3) . . ?
O217 C216 C214 126(3) . . ?
C217 C216 C214 107(3) . . ?
O217 C216 C215 107(3) . . ?
C217 C216 C215 109(3) . . ?
C216 C217 H21M 109.5 . . ?
C216 C217 H21N 109.5 . . ?
H21M C217 H21N 109.5 . . ?
C216 C217 H21O 109.5 . . ?
H21M C217 H21O 109.5 . . ?
H21N C217 H21O 109.5 . . ?
C219 C218 H21P 109.5 . . ?
C219 C218 H21Q 109.5 . . ?
H21P C218 H21Q 109.5 . . ?
C219 C218 H21R 109.5 . . ?
H21P C218 H21R 109.5 . . ?
H21Q C218 H21R 109.5 . . ?
C219 C220 H22D 109.5 . . ?
C219 C220 H22E 109.5 . . ?
H22D C220 H22E 109.5 . . ?
C219 C220 H22F 109.5 . . ?
H22D C220 H22F 109.5 . . ?
H22E C220 H22F 109.5 . . ?
C223 C222 H22G 109.5 . . ?
C223 C222 H22H 109.5 . . ?
H22G C222 H22H 109.5 . . ?
C223 C222 H22I 109.5 . . ?
H22G C222 H22I 109.5 . . ?
H22H C222 H22I 109.5 . . ?
C224 C223 O225 113(2) . . ?
C224 C223 C222 117(2) . . ?
O225 C223 C222 120(2) . . ?
C223 C224 H22J 109.5 . . ?
C223 C224 H22K 109.5 . . ?
H22J C224 H22K 109.5 . . ?
C223 C224 H22L 109.5 . . ?
H22J C224 H22L 109.5 . . ?
H22K C224 H22L 109.5 . . ?
C227 C226 H22M 109.5 . . ?
C227 C226 H22N 109.5 . . ?
H22M C226 H22N 109.5 . . ?
C227 C226 H22O 109.5 . . ?
H22M C226 H22O 109.5 . . ?
H22N C226 H22O 109.5 . . ?
O229 C227 C228 117(2) . . ?
O229 C227 C226 123(3) . . ?
C228 C227 C226 118(3) . . ?
C227 C228 H22P 109.5 . . ?
C227 C228 H22Q 109.5 . . ?
H22P C228 H22Q 109.5 . . ?
C227 C228 H22R 109.5 . . ?
H22P C228 H22R 109.5 . . ?
H22Q C228 H22R 109.5 . . ?
C231 C230 H23D 109.5 . . ?
C231 C230 H23E 109.5 . . ?
H23D C230 H23E 109.5 . . ?
C231 C230 H23F 109.5 . . ?
H23D C230 H23F 109.5 . . ?
H23E C230 H23F 109.5 . . ?
O233 C231 C230 126(2) . . ?
O233 C231 C232 102(3) . . ?
C230 C231 C232 131(3) . . ?
C231 C232 H23G 109.5 . . ?
C231 C232 H23H 109.5 . . ?
H23G C232 H23H 109.5 . . ?
C231 C232 H23I 109.5 . . ?
H23G C232 H23I 109.5 . . ?
H23H C232 H23I 109.5 . . ?
C235 C234 H23J 109.5 . . ?
C235 C234 H23K 109.5 . . ?
H23J C234 H23K 109.5 . . ?
C235 C234 H23L 109.5 . . ?
H23J C234 H23L 109.5 . . ?
H23K C234 H23L 109.5 . . ?
O237 C235 C234 115(4) . . ?
O237 C235 C236 107(2) . . ?
C234 C235 C236 101.6(17) . . ?
C235 C236 H23M 109.5 . . ?
C235 C236 H23N 109.5 . . ?
H23M C236 H23N 109.5 . . ?
C235 C236 H23O 109.5 . . ?
H23M C236 H23O 109.5 . . ?
H23N C236 H23O 109.5 . . ?
 
loop_
 _geom_torsion_atom_site_label_1
 _geom_torsion_atom_site_label_2
 _geom_torsion_atom_site_label_3
 _geom_torsion_atom_site_label_4
 _geom_torsion
 _geom_torsion_site_symmetry_1
 _geom_torsion_site_symmetry_2
 _geom_torsion_site_symmetry_3
 _geom_torsion_site_symmetry_4
 _geom_torsion_publ_flag
C20 C16 C17 C18 -0.3(7) . . . . ?
C21 C16 C17 C18 -170.2(6) . . . . ?
Ru1 C16 C17 C18 62.6(5) . . . . ?
C20 C16 C17 C22 172.8(6) . . . . ?
C21 C16 C17 C22 2.9(11) . . . . ?
Ru1 C16 C17 C22 -124.3(7) . . . . ?
C20 C16 C17 Ru1 -62.9(4) . . . . ?
C21 C16 C17 Ru1 127.2(6) . . . . ?
C16 C17 C18 C19 -0.1(7) . . . . ?
C22 C17 C18 C19 -173.1(6) . . . . ?
Ru1 C17 C18 C19 62.6(4) . . . . ?
C16 C17 C18 C23 175.4(7) . . . . ?
C22 C17 C18 C23 2.4(11) . . . . ?
Ru1 C17 C18 C23 -121.9(7) . . . . ?
C16 C17 C18 Ru1 -62.8(5) . . . . ?
C22 C17 C18 Ru1 124.3(7) . . . . ?
C17 C18 C19 C20 0.5(7) . . . . ?
C23 C18 C19 C20 -175.0(6) . . . . ?
Ru1 C18 C19 C20 63.0(4) . . . . ?
C17 C18 C19 C24 172.4(6) . . . . ?
C23 C18 C19 C24 -3.2(11) . . . . ?
Ru1 C18 C19 C24 -125.1(7) . . . . ?
C17 C18 C19 Ru1 -62.5(5) . . . . ?
C23 C18 C19 Ru1 121.9(7) . . . . ?
C17 C16 C20 C19 0.6(7) . . . . ?
C21 C16 C20 C19 170.5(6) . . . . ?
Ru1 C16 C20 C19 -61.5(4) . . . . ?
C17 C16 C20 C25 -168.7(6) . . . . ?
C21 C16 C20 C25 1.2(11) . . . . ?
Ru1 C16 C20 C25 129.3(7) . . . . ?
C17 C16 C20 Ru1 62.1(4) . . . . ?
C21 C16 C20 Ru1 -128.1(7) . . . . ?
C18 C19 C20 C16 -0.7(7) . . . . ?
C24 C19 C20 C16 -172.5(6) . . . . ?
Ru1 C19 C20 C16 62.5(4) . . . . ?
C18 C19 C20 C25 168.1(7) . . . . ?
C24 C19 C20 C25 -3.7(11) . . . . ?
Ru1 C19 C20 C25 -128.7(7) . . . . ?
C18 C19 C20 Ru1 -63.1(4) . . . . ?
C24 C19 C20 Ru1 125.0(7) . . . . ?
C34 P6 C26 C27 -159.5(5) . . . . ?
C28 P6 C26 C27 94.6(5) . . . . ?
Ru1 P6 C26 C27 -33.5(5) . . . . ?
P6 C26 C27 P7 5.4(6) . . . . ?
C40 P7 C27 C26 152.9(5) . . . . ?
C46 P7 C27 C26 -102.5(5) . . . . ?
Ru1 P7 C27 C26 24.9(5) . . . . ?
C34 P6 C28 C33 124.9(6) . . . . ?
C26 P6 C28 C33 -126.6(6) . . . . ?
Ru1 P6 C28 C33 -7.4(7) . . . . ?
C34 P6 C28 C29 -59.2(7) . . . . ?
C26 P6 C28 C29 49.3(7) . . . . ?
Ru1 P6 C28 C29 168.6(6) . . . . ?
C33 C28 C29 C30 2.1(12) . . . . ?
P6 C28 C29 C30 -173.9(7) . . . . ?
C28 C29 C30 C31 -3.4(15) . . . . ?
C29 C30 C31 C32 2.5(15) . . . . ?
C30 C31 C32 C33 -0.6(14) . . . . ?
C29 C28 C33 C32 -0.2(11) . . . . ?
P6 C28 C33 C32 175.9(6) . . . . ?
C31 C32 C33 C28 -0.6(12) . . . . ?
C26 P6 C34 C39 -123.5(6) . . . . ?
C28 P6 C34 C39 -18.1(6) . . . . ?
Ru1 P6 C34 C39 116.4(6) . . . . ?
C26 P6 C34 C35 61.4(6) . . . . ?
C28 P6 C34 C35 166.7(5) . . . . ?
Ru1 P6 C34 C35 -58.8(6) . . . . ?
C39 C34 C35 C36 4.5(11) . . . . ?
P6 C34 C35 C36 179.9(6) . . . . ?
C34 C35 C36 C37 -2.5(12) . . . . ?
C35 C36 C37 C38 -1.6(12) . . . . ?
C36 C37 C38 C39 3.5(12) . . . . ?
C37 C38 C39 C34 -1.4(12) . . . . ?
C35 C34 C39 C38 -2.5(11) . . . . ?
P6 C34 C39 C38 -177.7(6) . . . . ?
C46 P7 C40 C41 -30.1(6) . . . . ?
C27 P7 C40 C41 77.7(6) . . . . ?
Ru1 P7 C40 C41 -161.1(4) . . . . ?
C46 P7 C40 C45 149.8(5) . . . . ?
C27 P7 C40 C45 -102.5(6) . . . . ?
Ru1 P7 C40 C45 18.7(6) . . . . ?
C45 C40 C41 C42 -2.3(10) . . . . ?
P7 C40 C41 C42 177.5(5) . . . . ?
C40 C41 C42 C43 1.3(11) . . . . ?
C41 C42 C43 C44 0.3(12) . . . . ?
C42 C43 C44 C45 -0.8(12) . . . . ?
C43 C44 C45 C40 -0.3(11) . . . . ?
C41 C40 C45 C44 1.9(10) . . . . ?
P7 C40 C45 C44 -177.9(5) . . . . ?
C40 P7 C46 C47 -56.9(6) . . . . ?
C27 P7 C46 C47 -162.7(6) . . . . ?
Ru1 P7 C46 C47 75.2(6) . . . . ?
C40 P7 C46 C51 125.2(6) . . . . ?
C27 P7 C46 C51 19.4(7) . . . . ?
Ru1 P7 C46 C51 -102.7(6) . . . . ?
C51 C46 C47 C48 1.1(12) . . . . ?
P7 C46 C47 C48 -176.9(7) . . . . ?
C46 C47 C48 C49 0.3(14) . . . . ?
C47 C48 C49 C50 -1.1(15) . . . . ?
C48 C49 C50 C51 0.6(15) . . . . ?
C49 C50 C51 C46 0.8(14) . . . . ?
C47 C46 C51 C50 -1.7(12) . . . . ?
P7 C46 C51 C50 176.2(7) . . . . ?
C53 P8 C52 P9 172.3(3) . . . . ?
C59 P8 C52 P9 -82.1(4) . . . . ?
Cu3 P8 C52 P9 49.3(3) . . . . ?
C65 P9 C52 P8 -175.7(3) . . . . ?
C71 P9 C52 P8 76.4(4) . . . . ?
Cu4 P9 C52 P8 -48.8(3) . . . . ?
C52 P8 C53 C54 -22.9(6) . . . . ?
C59 P8 C53 C54 -130.1(5) . . . . ?
Cu3 P8 C53 C54 94.9(5) . . . . ?
C52 P8 C53 C58 163.6(4) . . . . ?
C59 P8 C53 C58 56.4(5) . . . . ?
Cu3 P8 C53 C58 -78.6(5) . . . . ?
C58 C53 C54 C55 0.9(9) . . . . ?
P8 C53 C54 C55 -172.4(5) . . . . ?
C53 C54 C55 C56 -1.2(10) . . . . ?
C54 C55 C56 C57 1.2(10) . . . . ?
C55 C56 C57 C58 -0.9(10) . . . . ?
C56 C57 C58 C53 0.7(9) . . . . ?
C54 C53 C58 C57 -0.7(9) . . . . ?
P8 C53 C58 C57 173.1(4) . . . . ?
C52 P8 C59 C64 -69.9(6) . . . . ?
C53 P8 C59 C64 39.3(6) . . . . ?
Cu3 P8 C59 C64 169.3(5) . . . . ?
C52 P8 C59 C60 110.4(5) . . . . ?
C53 P8 C59 C60 -140.4(5) . . . . ?
Cu3 P8 C59 C60 -10.4(6) . . . . ?
C64 C59 C60 C61 1.0(10) . . . . ?
P8 C59 C60 C61 -179.3(5) . . . . ?
C59 C60 C61 C62 -0.8(11) . . . . ?
C60 C61 C62 C63 0.8(12) . . . . ?
C61 C62 C63 C64 -1.0(12) . . . . ?
C60 C59 C64 C63 -1.3(11) . . . . ?
P8 C59 C64 C63 179.0(6) . . . . ?
C62 C63 C64 C59 1.3(12) . . . . ?
C71 P9 C65 C66 -20.5(6) . . . . ?
C52 P9 C65 C66 -130.0(6) . . . . ?
Cu4 P9 C65 C66 109.4(5) . . . . ?
C71 P9 C65 C70 165.0(5) . . . . ?
C52 P9 C65 C70 55.5(6) . . . . ?
Cu4 P9 C65 C70 -65.1(6) . . . . ?
C70 C65 C66 C67 -1.7(11) . . . . ?
P9 C65 C66 C67 -176.1(6) . . . . ?
C65 C66 C67 C68 0.5(13) . . . . ?
C66 C67 C68 C69 -0.6(14) . . . . ?
C67 C68 C69 C70 1.9(13) . . . . ?
C68 C69 C70 C65 -3.1(11) . . . . ?
C66 C65 C70 C69 3.0(10) . . . . ?
P9 C65 C70 C69 177.6(6) . . . . ?
C65 P9 C71 C72 123.6(5) . . . . ?
C52 P9 C71 C72 -129.8(5) . . . . ?
Cu4 P9 C71 C72 -8.4(6) . . . . ?
C65 P9 C71 C76 -59.5(6) . . . . ?
C52 P9 C71 C76 47.1(6) . . . . ?
Cu4 P9 C71 C76 168.6(5) . . . . ?
C76 C71 C72 C73 -0.6(10) . . . . ?
P9 C71 C72 C73 176.5(5) . . . . ?
C71 C72 C73 C74 0.2(11) . . . . ?
C72 C73 C74 C75 0.5(11) . . . . ?
C73 C74 C75 C76 -0.7(11) . . . . ?
C72 C71 C76 C75 0.3(10) . . . . ?
P9 C71 C76 C75 -176.6(5) . . . . ?
C74 C75 C76 C71 0.3(11) . . . . ?
C84 P10 C77 P11 87.4(4) . . . . ?
C78 P10 C77 P11 -165.2(3) . . . . ?
Cu4 P10 C77 P11 -43.0(4) . . . . ?
C96 P11 C77 P10 180.0(3) . . . . ?
C90 P11 C77 P10 -73.2(4) . . . . ?
Cu5 P11 C77 P10 48.5(4) . . . . ?
C77 P10 C78 C79 42.2(6) . . . . ?
C84 P10 C78 C79 150.3(6) . . . . ?
Cu4 P10 C78 C79 -76.7(6) . . . . ?
C77 P10 C78 C83 -144.0(6) . . . . ?
C84 P10 C78 C83 -35.9(6) . . . . ?
Cu4 P10 C78 C83 97.2(6) . . . . ?
C83 C78 C79 C80 1.7(10) . . . . ?
P10 C78 C79 C80 175.7(5) . . . . ?
C78 C79 C80 C81 -1.0(11) . . . . ?
C79 C80 C81 C82 -0.5(12) . . . . ?
C80 C81 C82 C83 1.2(12) . . . . ?
C79 C78 C83 C82 -0.9(11) . . . . ?
P10 C78 C83 C82 -175.0(6) . . . . ?
C81 C82 C83 C78 -0.5(12) . . . . ?
C77 P10 C84 C85 62.9(7) . . . . ?
C78 P10 C84 C85 -44.3(7) . . . . ?
Cu4 P10 C84 C85 -173.7(5) . . . . ?
C77 P10 C84 C89 -116.3(6) . . . . ?
C78 P10 C84 C89 136.5(6) . . . . ?
Cu4 P10 C84 C89 7.1(7) . . . . ?
C89 C84 C85 C86 -0.3(12) . . . . ?
P10 C84 C85 C86 -179.5(7) . . . . ?
C84 C85 C86 C87 -0.5(14) . . . . ?
C85 C86 C87 C88 1.3(15) . . . . ?
C86 C87 C88 C89 -1.2(15) . . . . ?
C87 C88 C89 C84 0.4(13) . . . . ?
C85 C84 C89 C88 0.4(11) . . . . ?
P10 C84 C89 C88 179.6(6) . . . . ?
C96 P11 C90 C95 -117.6(5) . . . . ?
C77 P11 C90 C95 140.3(5) . . . . ?
Cu5 P11 C90 C95 19.5(6) . . . . ?
C96 P11 C90 C91 65.4(6) . . . . ?
C77 P11 C90 C91 -36.6(7) . . . . ?
Cu5 P11 C90 C91 -157.5(5) . . . . ?
C95 C90 C91 C92 -1.6(10) . . . . ?
P11 C90 C91 C92 175.3(5) . . . . ?
C90 C91 C92 C93 1.6(11) . . . . ?
C91 C92 C93 C94 -0.2(12) . . . . ?
C92 C93 C94 C95 -1.3(12) . . . . ?
C93 C94 C95 C90 1.3(11) . . . . ?
C91 C90 C95 C94 0.1(10) . . . . ?
P11 C90 C95 C94 -177.0(6) . . . . ?
C90 P11 C96 C101 11.1(7) . . . . ?
C77 P11 C96 C101 119.2(6) . . . . ?
Cu5 P11 C96 C101 -119.0(6) . . . . ?
C90 P11 C96 C97 -168.3(6) . . . . ?
C77 P11 C96 C97 -60.2(6) . . . . ?
Cu5 P11 C96 C97 61.6(6) . . . . ?
C101 C96 C97 C98 -2.4(12) . . . . ?
P11 C96 C97 C98 177.0(7) . . . . ?
C96 C97 C98 C99 1.6(14) . . . . ?
C97 C98 C99 C100 -0.2(14) . . . . ?
C98 C99 C100 C101 -0.6(14) . . . . ?
C99 C100 C101 C96 -0.2(13) . . . . ?
C97 C96 C101 C100 1.7(11) . . . . ?
P11 C96 C101 C100 -177.7(6) . . . . ?
C115 P13 C102 P12 -85.3(4) . . . . ?
C121 P13 C102 P12 167.8(3) . . . . ?
Cu3 P13 C102 P12 49.2(3) . . . . ?
C103 P12 C102 P13 -173.9(3) . . . . ?
C109 P12 C102 P13 82.0(4) . . . . ?
Cu5 P12 C102 P13 -47.4(4) . . . . ?
C102 P12 C103 C108 4.5(7) . . . . ?
C109 P12 C103 C108 110.2(6) . . . . ?
Cu5 P12 C103 C108 -116.4(6) . . . . ?
C102 P12 C103 C104 -173.7(5) . . . . ?
C109 P12 C103 C104 -67.9(6) . . . . ?
Cu5 P12 C103 C104 65.4(6) . . . . ?
C108 C103 C104 C105 -1.5(11) . . . . ?
P12 C103 C104 C105 176.7(6) . . . . ?
C103 C104 C105 C106 0.4(12) . . . . ?
C104 C105 C106 C107 0.5(13) . . . . ?
C105 C106 C107 C108 -0.4(13) . . . . ?
C106 C107 C108 C103 -0.8(12) . . . . ?
C104 C103 C108 C107 1.7(11) . . . . ?
P12 C103 C108 C107 -176.4(6) . . . . ?
C103 P12 C109 C114 163.7(5) . . . . ?
C102 P12 C109 C114 -90.8(5) . . . . ?
Cu5 P12 C109 C114 31.7(6) . . . . ?
C103 P12 C109 C110 -17.8(6) . . . . ?
C102 P12 C109 C110 87.7(5) . . . . ?
Cu5 P12 C109 C110 -149.8(5) . . . . ?
C114 C109 C110 C111 0.1(9) . . . . ?
P12 C109 C110 C111 -178.5(5) . . . . ?
C109 C110 C111 C112 1.9(11) . . . . ?
C110 C111 C112 C113 -1.2(11) . . . . ?
C111 C112 C113 C114 -1.6(11) . . . . ?
C110 C109 C114 C113 -2.8(9) . . . . ?
P12 C109 C114 C113 175.8(5) . . . . ?
C112 C113 C114 C109 3.6(11) . . . . ?
C102 P13 C115 C116 145.1(5) . . . . ?
C121 P13 C115 C116 -107.7(5) . . . . ?
Cu3 P13 C115 C116 18.4(6) . . . . ?
C102 P13 C115 C120 -40.9(6) . . . . ?
C121 P13 C115 C120 66.3(6) . . . . ?
Cu3 P13 C115 C120 -167.6(4) . . . . ?
C120 C115 C116 C117 -2.2(9) . . . . ?
P13 C115 C116 C117 172.2(5) . . . . ?
C115 C116 C117 C118 1.7(10) . . . . ?
C116 C117 C118 C119 0.6(10) . . . . ?
C117 C118 C119 C120 -2.3(10) . . . . ?
C118 C119 C120 C115 1.8(10) . . . . ?
C116 C115 C120 C119 0.5(9) . . . . ?
P13 C115 C120 C119 -173.6(5) . . . . ?
C102 P13 C121 C122 109.8(5) . . . . ?
C115 P13 C121 C122 0.5(6) . . . . ?
Cu3 P13 C121 C122 -132.9(5) . . . . ?
C102 P13 C121 C126 -74.3(5) . . . . ?
C115 P13 C121 C126 176.4(5) . . . . ?
Cu3 P13 C121 C126 43.1(5) . . . . ?
C126 C121 C122 C123 0.4(9) . . . . ?
P13 C121 C122 C123 176.2(5) . . . . ?
C121 C122 C123 C124 0.6(10) . . . . ?
C122 C123 C124 C125 -0.8(11) . . . . ?
C123 C124 C125 C126 -0.1(11) . . . . ?
C124 C125 C126 C121 1.1(10) . . . . ?
C122 C121 C126 C125 -1.3(9) . . . . ?
P13 C121 C126 C125 -177.4(5) . . . . ?
C131 C127 C128 C129 -1.8(7) . . . . ?
C132 C127 C128 C129 -178.4(7) . . . . ?
Ru2 C127 C128 C129 61.7(5) . . . . ?
C131 C127 C128 C133 168.7(7) . . . . ?
C132 C127 C128 C133 -8.0(12) . . . . ?
Ru2 C127 C128 C133 -127.9(7) . . . . ?
C131 C127 C128 Ru2 -63.4(4) . . . . ?
C132 C127 C128 Ru2 119.9(7) . . . . ?
C127 C128 C129 C130 0.9(8) . . . . ?
C133 C128 C129 C130 -169.1(7) . . . . ?
Ru2 C128 C129 C130 61.1(4) . . . . ?
C127 C128 C129 C134 171.2(7) . . . . ?
C133 C128 C129 C134 1.2(12) . . . . ?
Ru2 C128 C129 C134 -128.6(7) . . . . ?
C127 C128 C129 Ru2 -60.2(5) . . . . ?
C133 C128 C129 Ru2 129.7(7) . . . . ?
C128 C129 C130 C131 0.4(7) . . . . ?
C134 C129 C130 C131 -170.4(6) . . . . ?
Ru2 C129 C130 C131 62.4(4) . . . . ?
C128 C129 C130 C135 172.8(6) . . . . ?
C134 C129 C130 C135 2.0(11) . . . . ?
Ru2 C129 C130 C135 -125.2(7) . . . . ?
C128 C129 C130 Ru2 -62.0(5) . . . . ?
C134 C129 C130 Ru2 127.2(7) . . . . ?
C129 C130 C131 C127 -1.5(7) . . . . ?
C135 C130 C131 C127 -173.9(6) . . . . ?
Ru2 C130 C131 C127 62.8(4) . . . . ?
C129 C130 C131 C136 173.0(6) . . . . ?
C135 C130 C131 C136 0.6(11) . . . . ?
Ru2 C130 C131 C136 -122.7(7) . . . . ?
C129 C130 C131 Ru2 -64.3(4) . . . . ?
C135 C130 C131 Ru2 123.3(7) . . . . ?
C128 C127 C131 C130 2.0(7) . . . . ?
C132 C127 C131 C130 178.6(7) . . . . ?
Ru2 C127 C131 C130 -63.7(4) . . . . ?
C128 C127 C131 C136 -172.6(6) . . . . ?
C132 C127 C131 C136 4.0(11) . . . . ?
Ru2 C127 C131 C136 121.7(6) . . . . ?
C128 C127 C131 Ru2 65.7(5) . . . . ?
C132 C127 C131 Ru2 -117.7(7) . . . . ?
C139 P14 C137 C138 -175.4(5) . . . . ?
C145 P14 C137 C138 -69.5(5) . . . . ?
Ru2 P14 C137 C138 54.9(5) . . . . ?
P14 C137 C138 P15 -41.1(6) . . . . ?
C157 P15 C138 C137 138.0(5) . . . . ?
C151 P15 C138 C137 -120.6(5) . . . . ?
Ru2 P15 C138 C137 12.9(6) . . . . ?
C145 P14 C139 C144 -161.8(6) . . . . ?
C137 P14 C139 C144 -54.9(7) . . . . ?
Ru2 P14 C139 C144 65.3(7) . . . . ?
C145 P14 C139 C140 20.1(7) . . . . ?
C137 P14 C139 C140 127.0(6) . . . . ?
Ru2 P14 C139 C140 -112.8(6) . . . . ?
C144 C139 C140 C141 2.5(12) . . . . ?
P14 C139 C140 C141 -179.3(7) . . . . ?
C139 C140 C141 C142 0.0(13) . . . . ?
C140 C141 C142 C143 -1.7(14) . . . . ?
C141 C142 C143 C144 0.8(15) . . . . ?
C142 C143 C144 C139 1.9(14) . . . . ?
C140 C139 C144 C143 -3.5(12) . . . . ?
P14 C139 C144 C143 178.3(7) . . . . ?
C139 P14 C145 C150 70.3(6) . . . . ?
C137 P14 C145 C150 -38.1(6) . . . . ?
Ru2 P14 C145 C150 -154.8(5) . . . . ?
C139 P14 C145 C146 -113.9(7) . . . . ?
C137 P14 C145 C146 137.7(6) . . . . ?
Ru2 P14 C145 C146 21.1(7) . . . . ?
C150 C145 C146 C147 -3.0(13) . . . . ?
P14 C145 C146 C147 -179.0(7) . . . . ?
C145 C146 C147 C148 0.8(15) . . . . ?
C146 C147 C148 C149 2.9(14) . . . . ?
C147 C148 C149 C150 -4.2(13) . . . . ?
C146 C145 C150 C149 1.7(11) . . . . ?
P14 C145 C150 C149 177.6(6) . . . . ?
C148 C149 C150 C145 1.8(11) . . . . ?
C157 P15 C151 C152 -121.6(5) . . . . ?
C138 P15 C151 C152 132.8(6) . . . . ?
Ru2 P15 C151 C152 8.6(6) . . . . ?
C157 P15 C151 C156 55.4(6) . . . . ?
C138 P15 C151 C156 -50.1(6) . . . . ?
Ru2 P15 C151 C156 -174.3(4) . . . . ?
C156 C151 C152 C153 0.0(9) . . . . ?
P15 C151 C152 C153 177.1(5) . . . . ?
C151 C152 C153 C154 0.9(9) . . . . ?
C152 C153 C154 C155 -0.9(10) . . . . ?
C153 C154 C155 C156 0.1(10) . . . . ?
C152 C151 C156 C155 -0.7(10) . . . . ?
P15 C151 C156 C155 -177.9(5) . . . . ?
C154 C155 C156 C151 0.7(10) . . . . ?
C151 P15 C157 C162 -142.6(6) . . . . ?
C138 P15 C157 C162 -39.8(7) . . . . ?
Ru2 P15 C157 C162 81.7(7) . . . . ?
C151 P15 C157 C158 41.5(6) . . . . ?
C138 P15 C157 C158 144.3(6) . . . . ?
Ru2 P15 C157 C158 -94.2(6) . . . . ?
C162 C157 C158 C159 0.2(11) . . . . ?
P15 C157 C158 C159 176.2(5) . . . . ?
C157 C158 C159 C160 0.7(11) . . . . ?
C158 C159 C160 C161 -1.8(13) . . . . ?
C159 C160 C161 C162 2.0(16) . . . . ?
C158 C157 C162 C161 0.0(12) . . . . ?
P15 C157 C162 C161 -175.9(7) . . . . ?
C160 C161 C162 C157 -1.1(15) . . . . ?
 
_refine_diff_density_max    1.586
_refine_diff_density_min   -1.050
_refine_diff_density_rms    0.133

_shelxl_version_number 2014/6

_shelx_res_file
;
REM BLOC 1
REM BLOC -2 RU1 > C65
REM BLOC -3 C60 > O237
REM  NS_01 in P2(1)/n
REM R1 =  0.0770 for  22179 Fo > 4sig(Fo)  and  0.1315 for all  34429 data
REM   1725 parameters refined using     21 restraints
REM Highest difference peak  1.588,  deepest hole -1.286,  1-sigma level  0.134
REM  NS_01 in P2(1)/n
REM R1 =  0.0769 for  22179 Fo > 4sig(Fo)  and  0.1314 for all  34429 data
REM   1709 parameters refined using     23 restraints
REM Highest difference peak  1.582,  deepest hole -1.182,  1-sigma level  0.133
REM  NS_01 in P2(1)/n
REM R1 =  0.0769 for  22179 Fo > 4sig(Fo)  and  0.1314 for all  34429 data
REM   1714 parameters refined using     23 restraints
REM Highest difference peak  1.581,  deepest hole -1.183,  1-sigma level  0.133
TITL NS_01 in P2(1)/n
CELL 0.71073 15.4381 33.2292 31.2137 90.000 93.349 90.000
ZERR 4.0000 0.0004 0.0013 0.0009 0.000 0.002 0.000
LATT 1
SYMM 0.5-X, 0.5+Y, 0.5-Z
SFAC C H F P CU RU O
UNIT 668 640 24 44 12 8 16
MERG 2
FMAP 2
GRID
PLAN 20
TEMP -123
SIZE 0.2 0.15 0.08
BOND $H
CONF
ISOR F201 O237
DFIX -2.2 0.02 F202 F201
DFIX -2.2 0.02 F206 F205
DFIX -1.35 0.02 C226 C227
DFIX 1.45 0.02 C231 C232
DFIX 1.45 0.02 C222 C223
DFIX 1.45 0.02 C215 C216
DFIX -1.2 0.02 C211 O213
DFIX 1.45 0.02 C211 C212
DFIX -1.35 0.02 C216 C214
DFIX 1.45 0.02 C216 C215
DFIX -1.35 0.02 C216 C217
DFIX 1.25 0.02 C235 O237
DFIX -1.35 0.02 C234 C235
DFIX -1.35 0.02 C235 C236
DFIX -2.2 0.02 C234 C236
DFIX -2.2 0.02 C236 O237
DFIX -2.2 0.02 C214 C217
DFIX 1.6 0.02 P200 F206
L.S. 20
ACTA 52
WGHT    0.079200   81.043396
FVAR       0.35629
RU1   6    0.387840    0.210279    0.901583    11.00000    0.01771    0.02842 =
         0.02667    0.00182   -0.00161   -0.00255
RU2   6   -0.251617   -0.067548    0.703910    11.00000    0.02519    0.02295 =
         0.03113   -0.00230   -0.00517   -0.00196
CU3   5   -0.001283    0.092733    0.816757    11.00000    0.01876    0.02282 =
         0.02734    0.00270    0.00342    0.00009
CU4   5    0.072615    0.099015    0.747610    11.00000    0.02148    0.02599 =
         0.02556    0.00230    0.00185   -0.00056
CU5   5    0.122877    0.041034    0.800056    11.00000    0.01780    0.02512 =
         0.02752    0.00235    0.00072    0.00174
C1    1    0.302654    0.175212    0.868058    11.00000    0.02097    0.03383 =
         0.03219    0.00323   -0.00064    0.00129
C2    1    0.249883    0.153512    0.848117    11.00000    0.02013    0.02875 =
         0.03018   -0.00045   -0.00169    0.00023
C3    1    0.191217    0.126763    0.828597    11.00000    0.02015    0.02782 =
         0.02653    0.00442    0.00185    0.00272
C4    1    0.140723    0.102728    0.812294    11.00000    0.01609    0.03153 =
         0.02438   -0.00165    0.00323    0.00121
C5    1   -0.009831    0.052462    0.763599    11.00000    0.02172    0.02366 =
         0.03012    0.00420   -0.00291   -0.00178
P6    4    0.368581    0.168976    0.957463    11.00000    0.02124    0.03011 =
         0.02807    0.00432   -0.00153   -0.00335
C6    1   -0.048550    0.021703    0.752972    11.00000    0.01733    0.03233 =
         0.02265    0.00440   -0.00069    0.00173
P7    4    0.267731    0.238120    0.926308    11.00000    0.02140    0.02958 =
         0.02857    0.00028   -0.00037   -0.00196
C7    1   -0.097189   -0.011192    0.740855    11.00000    0.02110    0.02784 =
         0.03100   -0.00107    0.00097   -0.00111
P8    4   -0.070547    0.153027    0.813555    11.00000    0.02067    0.02437 =
         0.02945    0.00431    0.00329    0.00432
C8    1   -0.149119   -0.036948    0.728743    11.00000    0.02855    0.02570 =
         0.02729   -0.00009    0.00053    0.00286
P9    4    0.021620    0.161197    0.732483    11.00000    0.02527    0.02698 =
         0.02529    0.00401    0.00200    0.00131
P10   4    0.141284    0.078538    0.689624    11.00000    0.02552    0.03355 =
         0.02694    0.00148    0.00368    0.00231
P11   4    0.210836    0.014292    0.750389    11.00000    0.01893    0.02824 =
         0.03126   -0.00170    0.00089    0.00271
P12   4    0.093967   -0.000840    0.855313    11.00000    0.01818    0.02581 =
         0.02970    0.00433    0.00102    0.00330
P13   4   -0.043159    0.059190    0.875296    11.00000    0.01717    0.02415 =
         0.02793    0.00724    0.00132   -0.00028
P14   4   -0.158782   -0.110962    0.676492    11.00000    0.03084    0.02683 =
         0.03310   -0.00694   -0.00162   -0.00164
P15   4   -0.238048   -0.110488    0.760688    11.00000    0.02996    0.02353 =
         0.02945   -0.00182   -0.00440   -0.00054
C16   1    0.533009    0.217237    0.909286    11.00000    0.01987    0.04050 =
         0.03768    0.01158    0.00155   -0.00621
C17   1    0.510565    0.196398    0.870121    11.00000    0.02294    0.03840 =
         0.05056   -0.00049    0.00934   -0.00741
C18   1    0.459454    0.221798    0.842304    11.00000    0.01670    0.06933 =
         0.03646    0.00709    0.00240   -0.00175
C19   1    0.449564    0.258757    0.864154    11.00000    0.02653    0.04057 =
         0.05480    0.02443    0.01737    0.00369
C20   1    0.496552    0.255637    0.906034    11.00000    0.02398    0.03688 =
         0.04451    0.00225    0.00541   -0.01003
C21   1    0.597780    0.203027    0.944358    11.00000    0.02320    0.09268 =
         0.06451    0.03892   -0.00452   -0.00323
AFIX 137
H21A  2    0.656600    0.204944    0.934306    11.00000   -1.50000
H21B  2    0.585349    0.175002    0.951610    11.00000   -1.50000
H21C  2    0.593305    0.219941    0.969854    11.00000   -1.50000
AFIX   0
C22   1    0.545205    0.156146    0.858722    11.00000    0.04694    0.04470 =
         0.11939   -0.01548    0.04251    0.00157
AFIX 137
H22A  2    0.516428    0.146992    0.831644    11.00000   -1.50000
H22B  2    0.534120    0.136852    0.881509    11.00000   -1.50000
H22C  2    0.607831    0.158140    0.855523    11.00000   -1.50000
AFIX   0
C23   1    0.427307    0.212756    0.796564    11.00000    0.04308    0.18054 =
         0.03364   -0.00826    0.00485   -0.03255
AFIX 137
H23A  2    0.475789    0.214575    0.777742    11.00000   -1.50000
H23B  2    0.382485    0.232295    0.787312    11.00000   -1.50000
H23C  2    0.402838    0.185546    0.795030    11.00000   -1.50000
AFIX   0
C24   1    0.409357    0.296120    0.845215    11.00000    0.03947    0.07491 =
         0.10274    0.05586    0.02504    0.01555
AFIX 137
H24A  2    0.414807    0.317987    0.866267    11.00000   -1.50000
H24B  2    0.347840    0.291202    0.837457    11.00000   -1.50000
H24C  2    0.439055    0.303672    0.819501    11.00000   -1.50000
AFIX   0
C25   1    0.518446    0.289454    0.937402    11.00000    0.05909    0.04658 =
         0.08463   -0.01960    0.02595   -0.02459
AFIX  33
H25A  2    0.485156    0.313520    0.928746    11.00000   -1.50000
H25B  2    0.503718    0.281285    0.966255    11.00000   -1.50000
H25C  2    0.580621    0.295425    0.937489    11.00000   -1.50000
AFIX   0
C26   1    0.250962    0.160815    0.960989    11.00000    0.02123    0.02857 =
         0.04748    0.01072    0.00247   -0.00345
C27   1    0.197968    0.198327    0.947040    11.00000    0.02344    0.03417 =
         0.04706    0.00593    0.00095   -0.00821
C28   1    0.400693    0.184622    1.013048    11.00000    0.02797    0.04820 =
         0.02590   -0.00015   -0.00145   -0.00575
C29   1    0.376513    0.163281    1.048520    11.00000    0.05476    0.06137 =
         0.03450    0.00894   -0.00155   -0.02379
AFIX  43
H29   2    0.347092    0.138326    1.044585    11.00000   -1.20000
AFIX   0
C30   1    0.394934    0.178059    1.090404    11.00000    0.08438    0.08195 =
         0.03079    0.00247   -0.00161   -0.03153
AFIX  43
H30   2    0.375107    0.163741    1.114288    11.00000   -1.20000
AFIX   0
C31   1    0.440907    0.212682    1.096859    11.00000    0.06426    0.07764 =
         0.03051   -0.00925   -0.00392   -0.01402
AFIX  43
H31   2    0.455396    0.222144    1.125092    11.00000   -1.20000
AFIX   0
C32   1    0.465871    0.233612    1.061883    11.00000    0.04976    0.05671 =
         0.03567   -0.00855   -0.00884   -0.01524
AFIX  43
H32   2    0.497553    0.257948    1.066025    11.00000   -1.20000
AFIX   0
C33   1    0.445659    0.219875    1.020271    11.00000    0.03032    0.04900 =
         0.03391    0.00996   -0.00333   -0.00603
AFIX  43
H33   2    0.463265    0.235138    0.996557    11.00000   -1.20000
AFIX   0
C34   1    0.415184    0.119160    0.955283    11.00000    0.01828    0.03372 =
         0.04208    0.00952    0.00330   -0.00238
C35   1    0.388866    0.094383    0.920890    11.00000    0.03860    0.03284 =
         0.04519    0.00444   -0.00296    0.00600
AFIX  43
H35   2    0.347454    0.103925    0.899568    11.00000   -1.20000
AFIX   0
C36   1    0.422112    0.056569    0.917631    11.00000    0.04927    0.03839 =
         0.06416    0.00207   -0.00359    0.00283
AFIX  43
H36   2    0.402368    0.039392    0.894770    11.00000   -1.20000
AFIX   0
C37   1    0.485177    0.043347    0.948056    11.00000    0.03929    0.03865 =
         0.07006    0.01470    0.01441    0.00840
AFIX  43
H37   2    0.507472    0.016788    0.946306    11.00000   -1.20000
AFIX   0
C38   1    0.515433    0.068306    0.980540    11.00000    0.03440    0.05761 =
         0.06761    0.01769   -0.00358    0.01362
AFIX  43
H38   2    0.560769    0.059686    1.000316    11.00000   -1.20000
AFIX   0
C39   1    0.479777    0.105720    0.984222    11.00000    0.03631    0.05147 =
         0.05060    0.01061   -0.00804    0.00051
AFIX  43
H39   2    0.499836    0.122781    1.007126    11.00000   -1.20000
AFIX   0
C40   1    0.191919    0.265448    0.889222    11.00000    0.02023    0.02502 =
         0.04115    0.00112   -0.00440   -0.00091
C41   1    0.133030    0.292165    0.905187    11.00000    0.03425    0.03805 =
         0.04145    0.00130    0.00385    0.00445
AFIX  43
H41   2    0.130037    0.295654    0.935272    11.00000   -1.20000
AFIX   0
C42   1    0.077646    0.314102    0.876407    11.00000    0.03901    0.04633 =
         0.05557   -0.00657   -0.00379    0.01552
AFIX  43
H42   2    0.038087    0.332818    0.887423    11.00000   -1.20000
AFIX   0
C43   1    0.079371    0.309082    0.832366    11.00000    0.04138    0.04264 =
         0.05477    0.00733   -0.00948    0.01637
AFIX  43
H43   2    0.041734    0.324250    0.813384    11.00000   -1.20000
AFIX   0
C44   1    0.136244    0.281887    0.816660    11.00000    0.04713    0.03913 =
         0.03745   -0.00161   -0.01025    0.00572
AFIX  43
H44   2    0.137695    0.277852    0.786580    11.00000   -1.20000
AFIX   0
C45   1    0.192028    0.260112    0.844783    11.00000    0.02543    0.02829 =
         0.04151    0.00322   -0.00400    0.00253
AFIX  43
H45   2    0.230931    0.241250    0.833492    11.00000   -1.20000
AFIX   0
C46   1    0.281209    0.274657    0.970446    11.00000    0.02899    0.03995 =
         0.03249   -0.00477   -0.00033    0.00089
C47   1    0.309690    0.312099    0.960599    11.00000    0.05254    0.05422 =
         0.05051   -0.01957    0.01580   -0.01651
AFIX  43
H47   2    0.319006    0.318814    0.931644    11.00000   -1.20000
AFIX   0
C48   1    0.325131    0.340435    0.992649    11.00000    0.07139    0.05969 =
         0.06572   -0.02642    0.01481   -0.02606
AFIX  43
H48   2    0.344756    0.366605    0.985717    11.00000   -1.20000
AFIX   0
C49   1    0.311664    0.330343    1.035504    11.00000    0.06828    0.07978 =
         0.05679   -0.03555    0.00809   -0.01480
AFIX  43
H49   2    0.323181    0.349536    1.057666    11.00000   -1.20000
AFIX   0
C50   1    0.282361    0.293362    1.045097    11.00000    0.08671    0.06374 =
         0.03839   -0.01085    0.01013    0.00039
AFIX  43
H50   2    0.272737    0.286593    1.074005    11.00000   -1.20000
AFIX   0
C51   1    0.266502    0.265618    1.013255    11.00000    0.05297    0.04518 =
         0.03951   -0.00653    0.00673   -0.00208
AFIX  43
H51   2    0.245150    0.239776    1.020277    11.00000   -1.20000
AFIX   0
C52   1   -0.005028    0.186803    0.782593    11.00000    0.02868    0.02973 =
         0.02550    0.00327    0.00312    0.00264
AFIX  23
H52A  2    0.048981    0.193975    0.799533    11.00000   -1.20000
H52B  2   -0.037642    0.211868    0.775765    11.00000   -1.20000
AFIX   0
C53   1   -0.080939    0.177811    0.865388    11.00000    0.02895    0.02645 =
         0.02780    0.00892    0.00186    0.01025
C54   1   -0.023026    0.206815    0.882611    11.00000    0.02497    0.03799 =
         0.03258    0.00119    0.00233    0.00593
AFIX  43
H54   2    0.021437    0.217323    0.866029    11.00000   -1.20000
AFIX   0
C55   1   -0.031884    0.220073    0.924825    11.00000    0.03541    0.03640 =
         0.03722   -0.00321    0.00599    0.00448
AFIX  43
H55   2    0.008032    0.239357    0.936769    11.00000   -1.20000
AFIX   0
C56   1   -0.095979    0.206167    0.949286    11.00000    0.04736    0.04670 =
         0.03323   -0.00206    0.00328    0.01578
AFIX  43
H56   2   -0.101100    0.216048    0.977586    11.00000   -1.20000
AFIX   0
C57   1   -0.153446    0.177501    0.932396    11.00000    0.03258    0.03193 =
         0.03584    0.00903    0.01261    0.01346
AFIX  43
H57   2   -0.197751    0.167355    0.949312    11.00000   -1.20000
AFIX   0
C58   1   -0.146475    0.163503    0.890682    11.00000    0.02793    0.03020 =
         0.03188    0.00838    0.00260    0.00918
AFIX  43
H58   2   -0.186557    0.144050    0.879238    11.00000   -1.20000
AFIX   0
C59   1   -0.180668    0.159882    0.788787    11.00000    0.01928    0.03341 =
         0.03406    0.00759    0.00885    0.00457
C60   1   -0.221093    0.129433    0.764799    11.00000    0.02860    0.03107 =
         0.03874    0.00746    0.00423   -0.00287
AFIX  43
H60   2   -0.191739    0.104610    0.761413    11.00000   -1.20000
AFIX   0
C61   1   -0.304520    0.134625    0.745448    11.00000    0.02857    0.05511 =
         0.04344   -0.00385    0.00306   -0.00682
AFIX  43
H61   2   -0.331055    0.113581    0.728782    11.00000   -1.20000
AFIX   0
C62   1   -0.347320    0.169823    0.750589    11.00000    0.02196    0.07943 =
         0.05161   -0.00137   -0.00059    0.00828
AFIX  43
H62   2   -0.404199    0.173349    0.737831    11.00000   -1.20000
AFIX   0
C63   1   -0.307883    0.200583    0.774472    11.00000    0.04314    0.05921 =
         0.04827   -0.00908   -0.00154    0.02326
AFIX  43
H63   2   -0.337344    0.225398    0.777721    11.00000   -1.20000
AFIX   0
C64   1   -0.225131    0.195147    0.793709    11.00000    0.03506    0.04629 =
         0.03900   -0.00176   -0.00263    0.01403
AFIX  43
H64   2   -0.199017    0.216199    0.810518    11.00000   -1.20000
AFIX   0
C65   1    0.092660    0.197587    0.709078    11.00000    0.02843    0.02556 =
         0.03204    0.00596   -0.00099    0.00044
C66   1    0.080349    0.210310    0.666574    11.00000    0.03177    0.05158 =
         0.03468    0.01043   -0.00288   -0.00635
AFIX  43
H66   2    0.031419    0.201075    0.649477    11.00000   -1.20000
AFIX   0
C67   1    0.138770    0.236245    0.649141    11.00000    0.04310    0.07357 =
         0.04402    0.02671    0.00019   -0.01216
AFIX  43
H67   2    0.130107    0.245087    0.620265    11.00000   -1.20000
AFIX   0
C68   1    0.210695    0.249250    0.674596    11.00000    0.03971    0.06050 =
         0.05539    0.01868    0.00671   -0.01764
AFIX  43
H68   2    0.251380    0.266868    0.662695    11.00000   -1.20000
AFIX   0
C69   1    0.223767    0.237084    0.716466    11.00000    0.03501    0.04946 =
         0.05115    0.00505   -0.00067   -0.00881
AFIX  43
H69   2    0.272159    0.246888    0.733564    11.00000   -1.20000
AFIX   0
C70   1    0.166182    0.210446    0.733769    11.00000    0.03043    0.04068 =
         0.03203    0.00993    0.00152    0.00094
AFIX  43
H70   2    0.176551    0.200931    0.762308    11.00000   -1.20000
AFIX   0
C71   1   -0.078151    0.163386    0.697095    11.00000    0.02400    0.03847 =
         0.02766    0.00522    0.00162   -0.00156
C72   1   -0.107570    0.128373    0.678168    11.00000    0.02596    0.04929 =
         0.03540    0.00037    0.00399   -0.00141
AFIX  43
H72   2   -0.075023    0.104262    0.682147    11.00000   -1.20000
AFIX   0
C73   1   -0.185748    0.128149    0.652921    11.00000    0.03731    0.05758 =
         0.04032   -0.00815    0.00376   -0.00772
AFIX  43
H73   2   -0.205645    0.103690    0.640024    11.00000   -1.20000
AFIX   0
C74   1   -0.233459    0.162001    0.646526    11.00000    0.02976    0.07422 =
         0.03524    0.01013   -0.00358   -0.00308
AFIX  43
H74   2   -0.286515    0.161359    0.629514    11.00000   -1.20000
AFIX   0
C75   1   -0.204040    0.197216    0.664973    11.00000    0.03798    0.05380 =
         0.04053    0.01899   -0.00461    0.00626
AFIX  43
H75   2   -0.236549    0.221275    0.660478    11.00000   -1.20000
AFIX   0
C76   1   -0.126315    0.197929    0.690412    11.00000    0.03581    0.03732 =
         0.03033    0.00726    0.00077   -0.00022
AFIX  43
H76   2   -0.106616    0.222475    0.703184    11.00000   -1.20000
AFIX   0
C77   1    0.167858    0.025819    0.694865    11.00000    0.02734    0.03347 =
         0.03062   -0.00217    0.00217    0.00150
AFIX  23
H77A  2    0.211832    0.018690    0.674296    11.00000   -1.20000
H77B  2    0.115319    0.009454    0.687913    11.00000   -1.20000
AFIX   0
C78   1    0.074160    0.080393    0.638733    11.00000    0.03877    0.03940 =
         0.02376   -0.00033    0.00643    0.00947
C79   1    0.011540    0.051637    0.628528    11.00000    0.03760    0.04098 =
         0.03724    0.00015   -0.00113    0.00501
AFIX  43
H79   2    0.005342    0.029367    0.647187    11.00000   -1.20000
AFIX   0
C80   1   -0.043366    0.054789    0.590858    11.00000    0.04425    0.06204 =
         0.03551    0.00143   -0.00479    0.00729
AFIX  43
H80   2   -0.085215    0.034397    0.584350    11.00000   -1.20000
AFIX   0
C81   1   -0.037220    0.086517    0.563826    11.00000    0.05492    0.06664 =
         0.02977    0.00338   -0.00785    0.01630
AFIX  43
H81   2   -0.074032    0.088372    0.538431    11.00000   -1.20000
AFIX   0
C82   1    0.023342    0.115972    0.573875    11.00000    0.06294    0.05508 =
         0.04146    0.01845    0.00394    0.01354
AFIX  43
H82   2    0.027484    0.138590    0.555491    11.00000   -1.20000
AFIX   0
C83   1    0.079024    0.113013    0.610921    11.00000    0.04469    0.05061 =
         0.03822    0.00409    0.00233    0.00472
AFIX  43
H83   2    0.120666    0.133561    0.617131    11.00000   -1.20000
AFIX   0
C84   1    0.242566    0.102029    0.675816    11.00000    0.03086    0.04308 =
         0.03432    0.00418    0.00905    0.00163
C85   1    0.281276    0.092563    0.638084    11.00000    0.04121    0.05652 =
         0.04818   -0.00124    0.01430   -0.00013
AFIX  43
H85   2    0.254883    0.073634    0.618603    11.00000   -1.20000
AFIX   0
C86   1    0.359004    0.110986    0.628982    11.00000    0.05070    0.09943 =
         0.06052    0.01105    0.03250    0.00203
AFIX  43
H86   2    0.386150    0.104496    0.603329    11.00000   -1.20000
AFIX   0
C87   1    0.396397    0.138522    0.657074    11.00000    0.04852    0.07307 =
         0.08862    0.00435    0.02287   -0.01977
AFIX  43
H87   2    0.448860    0.151469    0.650506    11.00000   -1.20000
AFIX   0
C88   1    0.358576    0.147503    0.694591    11.00000    0.04757    0.05830 =
         0.07640   -0.00145    0.01047   -0.01277
AFIX  43
H88   2    0.385736    0.166246    0.714040    11.00000   -1.20000
AFIX   0
C89   1    0.281143    0.129537    0.704461    11.00000    0.03656    0.04161 =
         0.04865   -0.00190    0.00671   -0.00070
AFIX  43
H89   2    0.254934    0.135947    0.730393    11.00000   -1.20000
AFIX   0
C90   1    0.319572    0.035603    0.754764    11.00000    0.01959    0.03958 =
         0.04056    0.00356    0.00054    0.00627
C91   1    0.375617    0.035671    0.721233    11.00000    0.02505    0.04460 =
         0.05499    0.00597    0.00893    0.00436
AFIX  43
H91   2    0.359488    0.022420    0.695000    11.00000   -1.20000
AFIX   0
C92   1    0.454625    0.055102    0.726403    11.00000    0.02317    0.05043 =
         0.08691    0.01311    0.01469    0.00465
AFIX  43
H92   2    0.492303    0.055813    0.703416    11.00000   -1.20000
AFIX   0
C93   1    0.479042    0.073552    0.765029    11.00000    0.02071    0.04582 =
         0.09087   -0.00004   -0.00097   -0.00260
AFIX  43
H93   2    0.533596    0.086771    0.768261    11.00000   -1.20000
AFIX   0
C94   1    0.426095    0.073061    0.798489    11.00000    0.02568    0.05408 =
         0.06606   -0.00220   -0.00852   -0.00706
AFIX  43
H94   2    0.444065    0.085346    0.825018    11.00000   -1.20000
AFIX   0
C95   1    0.345560    0.054405    0.793397    11.00000    0.02640    0.03753 =
         0.05158    0.00412   -0.00203   -0.00166
AFIX  43
H95   2    0.307890    0.054451    0.816400    11.00000   -1.20000
AFIX   0
C96   1    0.228907   -0.039096    0.742907    11.00000    0.02815    0.03004 =
         0.03280   -0.00091    0.00549    0.00836
C97   1    0.157767   -0.062942    0.730544    11.00000    0.03182    0.03526 =
         0.06345   -0.00598   -0.00912    0.00283
AFIX  43
H97   2    0.101649   -0.051171    0.727696    11.00000   -1.20000
AFIX   0
C98   1    0.167211   -0.102394    0.722563    11.00000    0.05510    0.03730 =
         0.08348   -0.01366   -0.01280   -0.00075
AFIX  43
H98   2    0.118326   -0.118220    0.713414    11.00000   -1.20000
AFIX   0
C99   1    0.248835   -0.119893    0.727767    11.00000    0.06465    0.02957 =
         0.07614   -0.01411    0.01046    0.01089
AFIX  43
H99   2    0.255815   -0.147783    0.722236    11.00000   -1.20000
AFIX   0
C100  1    0.319603   -0.096920    0.740917    11.00000    0.04600    0.04980 =
         0.07652    0.00435    0.02214    0.02504
AFIX  43
H100  2    0.375306   -0.108991    0.744706    11.00000   -1.20000
AFIX   0
C101  1    0.309734   -0.056690    0.748534    11.00000    0.02942    0.04178 =
         0.05265    0.00286    0.00656    0.00464
AFIX  43
H101  2    0.358576   -0.040847    0.757709    11.00000   -1.20000
AFIX   0
C102  1   -0.018830    0.006385    0.870139    11.00000    0.01736    0.02738 =
         0.03236    0.00932    0.00287    0.00132
AFIX  23
H10A  2   -0.059050   -0.005759    0.847895    11.00000   -1.20000
H10B  2   -0.027399   -0.007408    0.897684    11.00000   -1.20000
AFIX   0
C103  1    0.098836   -0.054369    0.846309    11.00000    0.03376    0.02836 =
         0.03026    0.00525    0.00057    0.00674
C104  1    0.179922   -0.069999    0.838645    11.00000    0.04977    0.04441 =
         0.03985    0.00690    0.01037    0.01431
AFIX  43
H104  2    0.228304   -0.052534    0.836885    11.00000   -1.20000
AFIX   0
C105  1    0.190020   -0.110825    0.833607    11.00000    0.08315    0.03936 =
         0.05221    0.00747    0.01048    0.03477
AFIX  43
H105  2    0.245412   -0.121698    0.828549    11.00000   -1.20000
AFIX   0
C106  1    0.120034   -0.135582    0.835920    11.00000    0.09710    0.03263 =
         0.05443    0.00048   -0.01151    0.01801
AFIX  43
H106  2    0.127361   -0.163781    0.832661    11.00000   -1.20000
AFIX   0
C107  1    0.040123   -0.120766    0.842783    11.00000    0.05654    0.02897 =
         0.07836   -0.00190   -0.02194    0.00777
AFIX  43
H107  2   -0.007938   -0.138481    0.844136    11.00000   -1.20000
AFIX   0
C108  1    0.028954   -0.079965    0.847777    11.00000    0.04330    0.02862 =
         0.05469    0.00370   -0.00841    0.00916
AFIX  43
H108  2   -0.027038   -0.069462    0.852241    11.00000   -1.20000
AFIX   0
C109  1    0.156513    0.003234    0.907666    11.00000    0.01768    0.03391 =
         0.03089    0.00362    0.00731    0.00581
C110  1    0.172468   -0.029679    0.934662    11.00000    0.04133    0.03393 =
         0.02974    0.00769    0.00396   -0.00012
AFIX  43
H110  2    0.152054   -0.055573    0.926022    11.00000   -1.20000
AFIX   0
C111  1    0.218620   -0.024916    0.974676    11.00000    0.05206    0.04737 =
         0.03288    0.01121   -0.00044    0.00446
AFIX  43
H111  2    0.230383   -0.047861    0.992218    11.00000   -1.20000
AFIX   0
C112  1    0.246427    0.011618    0.988552    11.00000    0.03038    0.05466 =
         0.03289    0.00840   -0.00081    0.00309
AFIX  43
H112  2    0.276552    0.014672    1.015776    11.00000   -1.20000
AFIX   0
C113  1    0.230111    0.044109    0.962413    11.00000    0.03873    0.04320 =
         0.04175    0.00061    0.00096   -0.00705
AFIX  43
H113  2    0.248011    0.070090    0.972053    11.00000   -1.20000
AFIX   0
C114  1    0.187568    0.039961    0.921707    11.00000    0.02463    0.03529 =
         0.04118    0.01128   -0.00269   -0.00071
AFIX  43
H114  2    0.180137    0.062842    0.903618    11.00000   -1.20000
AFIX   0
C115  1   -0.006121    0.072772    0.930392    11.00000    0.01509    0.02857 =
         0.03858    0.00474   -0.00126   -0.00003
C116  1    0.028164    0.110592    0.937678    11.00000    0.01918    0.03466 =
         0.03665    0.01257    0.00110    0.00028
AFIX  43
H116  2    0.038673    0.127527    0.914016    11.00000   -1.20000
AFIX   0
C117  1    0.047558    0.124281    0.979150    11.00000    0.02568    0.03764 =
         0.04288    0.00337   -0.00270   -0.00428
AFIX  43
H117  2    0.069635    0.150769    0.983298    11.00000   -1.20000
AFIX   0
C118  1    0.035631    0.100456    1.014472    11.00000    0.02623    0.04945 =
         0.03219   -0.00173   -0.00414    0.00124
AFIX  43
H118  2    0.048617    0.110207    1.042729    11.00000   -1.20000
AFIX   0
C119  1    0.004408    0.062209    1.007520    11.00000    0.03471    0.03973 =
         0.03152    0.01292    0.00034    0.00306
AFIX  43
H119  2   -0.002422    0.044779    1.031210    11.00000   -1.20000
AFIX   0
C120  1   -0.017291    0.048757    0.966173    11.00000    0.03235    0.02690 =
         0.03564    0.00436   -0.00301    0.00193
AFIX  43
H120  2   -0.040399    0.022436    0.962197    11.00000   -1.20000
AFIX   0
C121  1   -0.161880    0.059445    0.877868    11.00000    0.02075    0.01676 =
         0.03067    0.00805    0.00272   -0.00034
C122  1   -0.203507    0.068669    0.914828    11.00000    0.02556    0.03465 =
         0.02985    0.00890    0.00167    0.00252
AFIX  43
H122  2   -0.170566    0.073707    0.940940    11.00000   -1.20000
AFIX   0
C123  1   -0.293580    0.070517    0.913532    11.00000    0.02323    0.04143 =
         0.03653    0.00571    0.00971    0.00580
AFIX  43
H123  2   -0.321864    0.077113    0.938829    11.00000   -1.20000
AFIX   0
C124  1   -0.342352    0.062907    0.876036    11.00000    0.01818    0.04469 =
         0.05023    0.00704    0.00862    0.00426
AFIX  43
H124  2   -0.403885    0.063937    0.875693    11.00000   -1.20000
AFIX   0
C125  1   -0.301981    0.053804    0.839032    11.00000    0.02523    0.05313 =
         0.03718    0.00264   -0.00378    0.00171
AFIX  43
H125  2   -0.335668    0.048524    0.813198    11.00000   -1.20000
AFIX   0
C126  1   -0.211460    0.052340    0.839511    11.00000    0.02692    0.03527 =
         0.02803    0.00628    0.00519    0.00716
AFIX  43
H126  2   -0.183538    0.046541    0.813895    11.00000   -1.20000
AFIX   0
C127  1   -0.292352   -0.019968    0.656567    11.00000    0.04427    0.03251 =
         0.03885    0.00931   -0.00681   -0.00292
C128  1   -0.338695   -0.054879    0.643456    11.00000    0.05008    0.03518 =
         0.03973    0.00041   -0.01448    0.00923
C129  1   -0.393199   -0.066212    0.677400    11.00000    0.03072    0.02651 =
         0.05959    0.00728   -0.02033   -0.00322
C130  1   -0.380871   -0.037647    0.711089    11.00000    0.01853    0.04338 =
         0.05807    0.01527   -0.00029    0.00364
C131  1   -0.320320   -0.008916    0.698288    11.00000    0.02156    0.02384 =
         0.04503   -0.00158   -0.00487    0.00375
C132  1   -0.230130    0.002351    0.630403    11.00000    0.06085    0.04966 =
         0.05461    0.01812    0.01076   -0.00089
AFIX 137
H13A  2   -0.260338    0.024655    0.615406    11.00000   -1.50000
H13B  2   -0.206650   -0.015946    0.609356    11.00000   -1.50000
H13C  2   -0.182580    0.012985    0.649280    11.00000   -1.50000
AFIX   0
C133  1   -0.340460   -0.071902    0.598598    11.00000    0.09369    0.05628 =
         0.04495   -0.00286   -0.02440    0.01957
AFIX 137
H13D  2   -0.372687   -0.097326    0.597632    11.00000   -1.50000
H13E  2   -0.280940   -0.076716    0.590528    11.00000   -1.50000
H13F  2   -0.368899   -0.052721    0.578499    11.00000   -1.50000
AFIX   0
C134  1   -0.462135   -0.097681    0.675994    11.00000    0.04436    0.03727 =
         0.10068    0.00744   -0.02712   -0.00914
AFIX 137
H13G  2   -0.518995   -0.084849    0.677658    11.00000   -1.50000
H13H  2   -0.452001   -0.116078    0.700311    11.00000   -1.50000
H13I  2   -0.460725   -0.112804    0.649089    11.00000   -1.50000
AFIX   0
C135  1   -0.431789   -0.035143    0.750519    11.00000    0.03246    0.06489 =
         0.07105    0.02245    0.01373    0.01074
AFIX 137
H13J  2   -0.396092   -0.022562    0.773815    11.00000   -1.50000
H13K  2   -0.448442   -0.062283    0.759170    11.00000   -1.50000
H13L  2   -0.484080   -0.018951    0.744319    11.00000   -1.50000
AFIX   0
C136  1   -0.295180    0.028816    0.721509    11.00000    0.04220    0.03104 =
         0.06863   -0.01072    0.00404    0.00095
AFIX 137
H13M  2   -0.234443    0.035147    0.716864    11.00000   -1.50000
H13N  2   -0.302237    0.025208    0.752271    11.00000   -1.50000
H13O  2   -0.332307    0.050937    0.710684    11.00000   -1.50000
AFIX   0
C137  1   -0.084062   -0.127460    0.721916    11.00000    0.03520    0.04065 =
         0.03691   -0.00980   -0.00667    0.00949
C138  1   -0.140717   -0.143766    0.756400    11.00000    0.04858    0.05946 =
         0.03662   -0.00041   -0.00236    0.02658
C139  1   -0.087998   -0.095797    0.634691    11.00000    0.03870    0.02653 =
         0.03920   -0.00173    0.00103    0.00168
C140  1   -0.096969   -0.110929    0.593120    11.00000    0.07360    0.04001 =
         0.03116    0.00420    0.00402   -0.01241
AFIX  43
H140  2   -0.141876   -0.129687    0.585831    11.00000   -1.20000
AFIX   0
C141  1   -0.041355   -0.099057    0.562122    11.00000    0.09516    0.04708 =
         0.04417   -0.00788    0.02153   -0.01095
AFIX  43
H141  2   -0.048194   -0.109640    0.533854    11.00000   -1.20000
AFIX   0
C142  1    0.024027   -0.071760    0.572590    11.00000    0.08090    0.05039 =
         0.06190   -0.00124    0.03865   -0.00389
AFIX  43
H142  2    0.063238   -0.064061    0.551716    11.00000   -1.20000
AFIX   0
C143  1    0.032339   -0.055626    0.613565    11.00000    0.05431    0.07034 =
         0.06623   -0.02265    0.02588   -0.01506
AFIX  43
H143  2    0.076714   -0.036598    0.620841    11.00000   -1.20000
AFIX   0
C144  1   -0.024212   -0.067413    0.643571    11.00000    0.04590    0.05525 =
         0.04656   -0.02244    0.01455   -0.00923
AFIX  43
H144  2   -0.019232   -0.055634    0.671338    11.00000   -1.20000
AFIX   0
C145  1   -0.202424   -0.158402    0.654987    11.00000    0.04464    0.02564 =
         0.02651   -0.00351    0.00079   -0.00347
C146  1   -0.290769   -0.161405    0.642929    11.00000    0.04887    0.02954 =
         0.08590   -0.01381   -0.02389    0.00659
AFIX  43
H146  2   -0.326920   -0.138518    0.645640    11.00000   -1.20000
AFIX   0
C147  1   -0.326871   -0.196937    0.627126    11.00000    0.05360    0.03964 =
         0.09242   -0.01993   -0.03098    0.00075
AFIX  43
H147  2   -0.386875   -0.198652    0.618667    11.00000   -1.20000
AFIX   0
C148  1   -0.273176   -0.229627    0.624067    11.00000    0.05796    0.03280 =
         0.05363   -0.01093   -0.00234   -0.00625
AFIX  43
H148  2   -0.295856   -0.253996    0.612103    11.00000   -1.20000
AFIX   0
C149  1   -0.187651   -0.227702    0.637943    11.00000    0.03859    0.02658 =
         0.06640   -0.00561    0.02225   -0.00053
AFIX  43
H149  2   -0.152461   -0.251124    0.637330    11.00000   -1.20000
AFIX   0
C150  1   -0.151998   -0.191609    0.652943    11.00000    0.02479    0.03954 =
         0.04576   -0.00643    0.01100   -0.00281
AFIX  43
H150  2   -0.092135   -0.190226    0.661780    11.00000   -1.20000
AFIX   0
C151  1   -0.223166   -0.094749    0.817696    11.00000    0.02576    0.02989 =
         0.03244    0.00144   -0.00446   -0.00796
C152  1   -0.230621   -0.055032    0.829945    11.00000    0.02252    0.02349 =
         0.03294    0.00056    0.00059   -0.00358
AFIX  43
H152  2   -0.241045   -0.034685    0.808892    11.00000   -1.20000
AFIX   0
C153  1   -0.222798   -0.044937    0.873275    11.00000    0.03408    0.03079 =
         0.03835   -0.00266    0.00633   -0.00775
AFIX  43
H153  2   -0.228899   -0.017532    0.881226    11.00000   -1.20000
AFIX   0
C154  1   -0.206558   -0.073133    0.905067    11.00000    0.02990    0.04950 =
         0.03096   -0.01059    0.00414   -0.00617
AFIX  43
H154  2   -0.200656   -0.065479    0.934417    11.00000   -1.20000
AFIX   0
C155  1   -0.199180   -0.112591    0.893014    11.00000    0.03645    0.04150 =
         0.03724    0.00633   -0.00182   -0.00564
AFIX  43
H155  2   -0.188094   -0.132789    0.914168    11.00000   -1.20000
AFIX   0
C156  1   -0.207904   -0.123082    0.849862    11.00000    0.03682    0.03264 =
         0.03786    0.00140   -0.00483   -0.00085
AFIX  43
H156  2   -0.203248   -0.150619    0.842146    11.00000   -1.20000
AFIX   0
C157  1   -0.327149   -0.146109    0.766067    11.00000    0.04415    0.02775 =
         0.04198    0.00823   -0.01569   -0.01099
C158  1   -0.394035   -0.136838    0.791984    11.00000    0.03961    0.04451 =
         0.04514    0.01186   -0.01327   -0.01177
AFIX  43
H158  2   -0.391832   -0.112697    0.808316    11.00000   -1.20000
AFIX   0
C159  1   -0.464646   -0.162725    0.794264    11.00000    0.05594    0.06674 =
         0.05107    0.02627   -0.01192   -0.02230
AFIX  43
H159  2   -0.510901   -0.156248    0.811826    11.00000   -1.20000
AFIX   0
C160  1   -0.466531   -0.197648    0.770852    11.00000    0.08850    0.05708 =
         0.06698    0.02587   -0.03959   -0.05249
AFIX  43
H160  2   -0.513606   -0.215834    0.772844    11.00000   -1.20000
AFIX   0
C161  1   -0.402174   -0.206377    0.745053    11.00000    0.12209    0.04482 =
         0.08151    0.00126    0.00325   -0.04085
AFIX  43
H161  2   -0.405070   -0.230239    0.728268    11.00000   -1.20000
AFIX   0
C162  1   -0.332092   -0.180886    0.742852    11.00000    0.08127    0.03724 =
         0.05602   -0.00885    0.00024   -0.02016
AFIX  43
H162  2   -0.286623   -0.187644    0.724916    11.00000   -1.20000
AFIX   0
P200  4    0.050535    0.228205    1.078899    11.00000    0.16201    0.13284 =
         0.39201    0.04054    0.00045   -0.05934
C219  1   -0.264401    0.147186    1.040903    10.75000    0.04593
F201  3    0.062912    0.190440    1.052551    11.00000    1.34572    0.14513 =
         0.44734   -0.13154   -0.16745    0.18166
F202  3    0.141591    0.233650    1.090484    11.00000    0.14626    0.56645 =
         0.29575    0.01522   -0.00781   -0.14168
F203  3    0.053355    0.204640    1.124968    11.00000    0.30667    0.28504 =
         0.81354    0.35154    0.22390    0.02425
F204  3    0.056341    0.250957    1.032703    11.00000    0.28086    0.24675 =
         0.29571    0.01167   -0.06252   -0.02272
F205  3   -0.048576    0.232133    1.085234    11.00000    0.15296    0.33064 =
         1.47758    0.21596    0.13455    0.06800
F206  3    0.049865    0.270639    1.109665    11.00000    0.40200    0.18862 =
         0.80861   -0.18383    0.06594    0.00820
C210  1    0.618075    0.258705    0.696327    10.50000    0.10249
AFIX  33
H21D  2    0.604779    0.250849    0.666401    10.50000   -1.50000
H21E  2    0.651820    0.283702    0.697188    10.50000   -1.50000
H21F  2    0.651820    0.237363    0.711154    10.50000   -1.50000
AFIX   0
C211  1    0.542587    0.264559    0.716157    10.50000    0.12280
C212  1    0.467857    0.260291    0.689040    10.50000    0.15395
AFIX  33
H21G  2    0.484126    0.252049    0.660455    10.50000   -1.50000
H21H  2    0.430115    0.239796    0.700696    10.50000   -1.50000
H21I  2    0.436930    0.286036    0.686957    10.50000   -1.50000
AFIX   0
O213  7    0.542573    0.274434    0.753289    10.50000    0.17596
PART 1
C214  1    0.761289    0.295375    0.994436    10.25000    0.09053
AFIX  33
H21J  2    0.822270    0.303615    0.997693    10.25000   -1.50000
H21K  2    0.757894    0.266820    0.986668    10.25000   -1.50000
H21L  2    0.731276    0.311452    0.971815    10.25000   -1.50000
PART 2
AFIX   0
C215  1    0.724600    0.341362    1.013922    10.25000    0.07227
AFIX  33
H21X  2    0.784303    0.348484    1.007949    10.25000   -1.50000
H21Z  2    0.688041    0.342089    0.987189    10.25000   -1.50000
H21Y  2    0.702484    0.360649    1.034375    10.25000   -1.50000
PART 0
AFIX   0
C216  1    0.723081    0.301249    1.032033    10.50000    0.07546
C217  1    0.786290    0.297940    1.063658    10.50000    0.14999
AFIX  33
H21M  2    0.842316    0.304857    1.052380    10.50000   -1.50000
H21N  2    0.774149    0.316334    1.087106    10.50000   -1.50000
H21O  2    0.788245    0.270231    1.074422    10.50000   -1.50000
AFIX   0
O217  7    0.654896    0.294746    1.038121    10.50000    0.12451
C218  1   -0.171345    0.145959    1.046172    10.75000    0.06712
AFIX  33
H21P  2   -0.151418    0.165047    1.068566    10.75000   -1.50000
H21Q  2   -0.152661    0.118731    1.054489    10.75000   -1.50000
H21R  2   -0.146492    0.153261    1.019056    10.75000   -1.50000
AFIX   0
C220  1   -0.316110    0.171390    1.068312    10.75000    0.07951
AFIX  33
H22D  2   -0.277729    0.187213    1.087938    10.75000   -1.50000
H22E  2   -0.353171    0.189570    1.050618    10.75000   -1.50000
H22F  2   -0.352433    0.153772    1.084935    10.75000   -1.50000
AFIX   0
O221  7   -0.302278    0.125798    1.014706    10.75000    0.07662
C222  1   -0.452936   -0.057975    0.888227    10.50000    0.09764
AFIX  33
H22G  2   -0.414807   -0.057896    0.864202    10.50000   -1.50000
H22H  2   -0.449460   -0.031846    0.902784    10.50000   -1.50000
H22I  2   -0.434624   -0.079249    0.908531    10.50000   -1.50000
AFIX   0
C223  1   -0.542018   -0.065313    0.872113    10.50000    0.06047
C224  1   -0.596366   -0.066251    0.898021    10.50000    0.11653
AFIX  33
H22J  2   -0.581629   -0.046842    0.920937    10.50000   -1.50000
H22K  2   -0.652887   -0.059327    0.884035    10.50000   -1.50000
H22L  2   -0.598996   -0.093352    0.910261    10.50000   -1.50000
AFIX   0
O225  7   -0.556720   -0.088812    0.842786    10.50000    0.12663
C226  1    0.273268    0.029322    0.512193    10.75000    0.17615
AFIX  33
H22M  2    0.257649    0.057308    0.517959    10.75000   -1.50000
H22N  2    0.312123    0.019234    0.535729    10.75000   -1.50000
H22O  2    0.302685    0.027943    0.485247    10.75000   -1.50000
AFIX   0
C227  1    0.203205    0.007342    0.509059    10.75000    0.12915
C228  1    0.132384    0.022098    0.523128    10.75000    0.12238
AFIX  33
H22P  2    0.139326    0.051133    0.527641    10.75000   -1.50000
H22Q  2    0.084025    0.017183    0.502027    10.75000   -1.50000
H22R  2    0.120329    0.009121    0.550337    10.75000   -1.50000
AFIX   0
O229  7    0.204090   -0.031172    0.501473    10.75000    0.19702
C230  1    0.278508   -0.084764    0.610724    10.50000    0.08285
AFIX  33
H23D  2    0.323800   -0.104417    0.605112    10.50000   -1.50000
H23E  2    0.261672   -0.087715    0.640351    10.50000   -1.50000
H23F  2    0.227869   -0.089419    0.590930    10.50000   -1.50000
AFIX   0
C231  1    0.306978   -0.049779    0.605309    10.50000    0.07529
C232  1    0.393069   -0.035147    0.601527    10.50000    0.20935
AFIX  33
H23G  2    0.432343   -0.057875    0.597731    10.50000   -1.50000
H23H  2    0.394234   -0.017191    0.576660    10.50000   -1.50000
H23I  2    0.411771   -0.020324    0.627591    10.50000   -1.50000
AFIX   0
O233  7    0.267892   -0.019542    0.609623    10.50000    0.09829
C234  1    0.965501    0.380569    1.027976    10.50000    0.17967
AFIX  33
H23J  2    0.987904    0.407318    1.021380    10.50000   -1.50000
H23K  2    0.904085    0.382664    1.034026    10.50000   -1.50000
H23L  2    0.998357    0.369595    1.053135    10.50000   -1.50000
AFIX   0
C235  1    0.973914    0.356148    0.994345    10.50000    0.05862
C236  1    1.065443    0.354022    0.992736    10.50000    0.10636
AFIX  33
H23M  2    1.088825    0.381119    0.988901    10.50000   -1.50000
H23N  2    1.090495    0.342509    1.019585    10.50000   -1.50000
H23O  2    1.080237    0.336970    0.968611    10.50000   -1.50000
AFIX   0
O237  7    0.947072    0.320807    0.999272    10.50000    0.46808
HKLF 4

REM  NS_01 in P2(1)/n
REM R1 =  0.0768 for   22179 Fo > 4sig(Fo)  and  0.1313 for all   34429 data
REM   1719 parameters refined using     20 restraints

END

WGHT      0.0789     81.3293

REM Highest difference peak  1.586,  deepest hole -1.050,  1-sigma level  0.133
Q1    1   0.5320  0.0353  0.6005  11.00000  0.05    1.59
Q2    1   0.5217  0.2591  0.6774  11.00000  0.05    1.44
Q3    1  -0.4065  0.0725  0.6074  11.00000  0.05    1.44
Q4    1  -0.3943  0.0869  0.6365  11.00000  0.05    1.42
Q5    1  -0.4665 -0.0399  0.8675  11.00000  0.05    1.25
Q6    1  -0.5205 -0.0322  0.8506  11.00000  0.05    1.13
Q7    1   0.7686  0.3241  0.9918  11.00000  0.05    1.04
Q8    1  -0.4436 -0.0686  0.9015  11.00000  0.05    0.98
Q9    1   0.3215 -0.0302  0.6138  11.00000  0.05    0.95
Q10   1  -0.5882 -0.0977  0.8931  11.00000  0.05    0.93
Q11   1   0.3777 -0.0626  0.5727  11.00000  0.05    0.93
Q12   1  -0.6094 -0.0546  0.9082  11.00000  0.05    0.92
Q13   1   1.1559  0.4115  1.0670  11.00000  0.05    0.91
Q14   1   0.7585  0.2829  1.0305  11.00000  0.05    0.90
Q15   1  -0.5831 -0.0346  0.8603  11.00000  0.05    0.86
Q16   1   0.0570  0.2230  1.0691  11.00000  0.05    0.85
Q17   1   0.4887  0.2211  0.6996  11.00000  0.05    0.85
Q18   1   1.0013  0.3617  1.0335  11.00000  0.05    0.84
Q19   1   0.6674  0.2696  1.0353  11.00000  0.05    0.84
Q20   1   1.0655  0.3570  1.0665  11.00000  0.05    0.83
;
_shelx_res_checksum   61643

_shelx_hkl_file
;
   0   0   4 54.7761 18.2988   4
   0   0   4 31.8512 16.1090   2
   0   0  -4 84.3514 18.4327   2
   0   0  -4 47.4286 18.2829   4
   0   0   5 1.18011 22.6206   2
   0   0  -5 36.6858 22.4561   2
   0   0  -5 12.9296 17.8008   4
   0   0   5 10.6010 18.8887   4
   0   0   6 3880.04 124.225   4
   0   0  -6 3675.42 121.565   4
   0   0   6 3575.22 117.596   2
   0   0  -6 3703.35 119.077   2
   0   0  -7 5.37518 24.9380   4
   0   0   7 31.5153 28.4221   2
   0   0  -7 18.6205 23.8672   2
   0   0   7-6.66491 26.1472   4
   0   0  -8 1083.63 78.6199   2
   0   0   8 1206.01 84.1749   2
   0   0   8 1125.08 84.7085   4
   0   0  -8 878.357 73.6760   4
   0   0   9 78.7563 42.1731   2
   0   0  -9 93.3579 38.9493   2
   0   0  -9-23.5384 38.4594   4
   0   0   9 5.69916 32.1013   4
   0   0 -10 299.640 47.5751   2
   0   0  10 355.336 53.0624   4
   0   0 -10 553.404 73.5687   4
   0   0  10 359.500 55.8960   2
   0   0  11 29.4125 41.3580   2
   0   0  11 26.5291 40.3830   4
   0   0 -11 35.4853 38.7033   4
   0   0 -11 11.3388 29.2378   2
   0   0 -12 1994.53 133.590   4
   0   0  12 2132.55 130.507   2
   0   0  12 1987.97 137.576   4
   0   0 -12 2013.52 130.676   2
   0   0  13 0.91158 34.0802   4
   0   0 -13 8.11127 35.1185   2
   0   0 -13 76.1286 52.7407   4
   0   0  13 19.9211 37.5717   2
   0   0  14 3268.07 173.587   2
   0   0 -14 3595.63 182.751   2
   0   0  14 3768.13 191.804   4
   0   0 -14 3552.03 190.558   4
   0   0 -15 33.9404 40.5151   2
   0   0  15 31.5356 43.4487   2
   0   0 -16 3344.44 198.055   4
   0   0  16 3340.80 188.016   2
   0   0  17 16.3200 38.7285   2
   0   0 -17 184.281 73.6669   4
   0   0 -18 10438.1 363.014   4
   0   0  18 9881.18 342.266   2
   0   0 -19 311.611 87.9119   4
   0   0  19 214.590 76.9103   2
   0   0  20 9468.69 354.210   2
   0   0 -20 9571.51 374.314   4
   0   0  21 190.162 67.0291   2
   0   0 -21 240.157 79.2639   4
   0   0 -22 472.815 91.0145   4
   0   0  22 425.662 83.0101   2
   0   0 -23-27.1193 53.3648   4
   0   0  23-12.1100 60.9205   2
   0   0  24 337.787 73.9544   2
   0   0 -24 44.2124 50.4523   4
   0   0 -25-9.93776 63.7791   4
   0   0  25-22.0228 64.5322   2
   0   0 -26 1047.24 146.713   4
   0   0  26 1003.55 137.709   2
   0   0 -27-40.0454 62.7459   4
   0   0  27 43.4420 55.5205   2
   0   0  28-93.3349 66.2198   2
   0   0 -28-36.1961 63.0059   4
   0   0  29-144.151 79.0677   2
   0   0 -29-258.995 109.086   4
   0   0  30 95.7100 63.3642   2
   0   0 -30 52.1758 81.3055   4
   0   0  31 49.6804 59.4630   2
   0   0 -31-96.1859 117.547   4
   0   0  32-9.87039 73.2576   2
   0   0 -32 22.9193 84.2122   4
   0   0 -33-72.9141 98.1544   4
   0   0  33-134.299 93.5030   2
   0   0 -34 101.172 74.9929   4
   0   0  34 14.5421 73.3490   2
   0   0 -35 10.7805 74.8014   4
   0   0  35-38.4352 93.8257   2
   0   0  36 2072.18 248.520   2
   0   0 -36 1972.42 261.930   4
   0   0 -37 54.7173 82.7579   4
   0   0  37 0.61515 82.9296   2
   0   0  38 197.163 119.080   2
   0   0 -38 136.505 142.147   4
   0   0 -39-31.8728 112.168   4
   0   0 -40 738.941 178.704   4
   0   1   4 85.8731 18.5247   2
   0   1   4 86.2491 21.4406   4
   0  -1  -4 64.9653 18.8507   4
   0   1  -4 55.3253 19.0766   4
   0  -1   4 49.9122 18.3880   4
   0  -1   4 99.6316 23.1951   2
   0   1  -4 99.4852 22.7030   2
   0  -1  -4 82.3439 17.9808   2
   0   1   5 4781.97 114.152   2
   0   1   5 4900.70 130.613   4
   0  -1   5 4827.78 131.982   2
   0  -1  -5 4835.00 114.710   2
   0  -1   5 4484.19 132.485   4
   0   1  -5 4776.49 131.910   4
   0   1  -5 4911.74 133.561   2
   0  -1  -5 4721.45 128.405   4
   0  -1   6 3109.66 112.969   4
   0   1   6 2931.75 110.670   4
   0  -1   6 2953.84 113.664   2
   0  -1  -6 2950.42 100.611   2
   0   1  -6 3123.27 115.611   2
   0   1   6 2954.60 101.463   2
   0  -1  -6 2720.04 106.826   4
   0   1  -6 2947.00 112.563   4
   0   1  -7 985.686 73.0963   2
   0  -1   7 1000.19 71.1866   4
   0   1  -7 932.501 72.0231   4
   0  -1   7 1011.41 74.1036   2
   0   1   7 1029.77 71.9981   4
   0  -1  -7 1014.04 67.0447   2
   0  -1  -7 896.293 67.1416   4
   0   1   7 948.510 66.7496   2
   0   1   8 5781.69 166.833   2
   0   1   8 6461.55 188.990   4
   0   1  -8 6144.49 182.101   4
   0  -1   8 6018.50 186.298   4
   0   1  -8 5972.61 180.999   2
   0  -1  -8 6119.40 169.018   2
   0  -1   8 5842.59 181.757   2
   0  -1  -8 6013.47 181.377   4
   0   1   9 8344.13 230.345   4
   0   1  -9 8100.39 223.561   2
   0  -1   9 7796.22 218.611   2
   0  -1  -9 7878.55 218.885   4
   0  -1   9 8608.39 230.754   4
   0   1   9 7817.75 204.167   2
   0   1  -9 8912.38 244.109   4
   0  -1  -9 7992.45 205.493   2
   0   1 -10 90.9990 35.4664   2
   0  -1  10 112.576 46.5620   2
   0  -1  10 103.818 48.8597   4
   0   1  10 107.833 40.6847   4
   0  -1 -10 98.5295 45.5735   4
   0  -1 -10 95.8001 33.9665   2
   0   1  10 97.8282 39.1163   2
   0  -1  11 1276.08 106.554   4
   0   1  11 1279.86 100.815   4
   0  -1 -11 1083.52 94.3318   4
   0   1 -11 1136.77 96.4785   2
   0   1  11 1187.01 90.4169   2
   0   1 -11 1034.89 101.539   4
   0  -1 -11 1219.70 92.6572   2
   0  -1  11 1165.17 97.9566   2
   0   1 -12 1804.64 124.705   2
   0   1  12 2015.54 131.913   4
   0   1  12 1879.37 119.381   2
   0   1 -12 2310.42 145.711   4
   0  -1  12 1843.81 125.994   2
   0  -1 -12 1863.47 119.850   2
   0  -1 -12 1999.35 128.376   4
   0  -1  12 2067.68 134.643   4
   0   1 -13 554.558 74.1132   2
   0  -1 -13 536.450 76.9040   4
   0  -1  13 584.949 76.4522   4
   0   1 -13 743.742 94.5077   4
   0  -1  13 533.435 79.0647   2
   0  -1 -13 508.117 66.9117   2
   0   1  13 535.597 72.3579   4
   0   1  13 562.377 71.9938   2
   0   1 -14 2488.17 159.360   4
   0   1  14 2312.07 145.352   2
   0   1 -14 2389.11 152.111   2
   0  -1 -14 2278.73 155.153   4
   0  -1  14 2384.41 153.677   2
   0   1  14 2568.50 161.165   4
   0  -1 -14 2495.80 147.786   2
   0  -1  14 2298.18 151.802   4
   0  -1 -15 431.355 71.8621   2
   0   1  15 474.466 77.4484   2
   0   1 -15 271.806 66.1220   4
   0  -1  15 383.113 73.4399   2
   0   1  15 451.730 74.7421   4
   0  -1 -15 493.159 94.4688   4
   0   1 -15 342.775 70.8116   2
   0  -1  16 298.700 73.7302   2
   0   1 -16 226.070 63.9247   4
   0   1  16 281.332 64.2113   2
   0  -1 -16 278.533 72.3577   4
   0  -1 -16 240.925 60.0619   2
   0   1  17 87.9258 48.1844   2
   0  -1 -17 42.2154 50.9584   4
   0  -1  17 37.4564 39.5665   2
   0   1 -17 42.2075 47.8448   4
   0  -1 -18 641.012 94.3728   4
   0   1  18 718.067 100.816   2
   0  -1  18 662.195 102.884   2
   0   1 -18 824.454 116.330   4
   0  -1  19 435.240 87.6583   2
   0   1 -19 425.187 92.3299   4
   0   1  19 281.004 66.5196   2
   0  -1 -19 403.963 83.9123   4
   0   1  20 141.796 57.6124   2
   0   1 -20 104.169 56.9922   4
   0  -1  20 164.207 65.5145   2
   0  -1 -20 153.629 68.4281   4
   0  -1  21 64.7465 46.4280   2
   0  -1 -21 75.5914 54.3645   4
   0   1 -21 117.848 60.5202   4
   0   1  21 51.2048 50.7036   2
   0   1  22 87.6518 54.9945   2
   0  -1  22-9.25205 45.7281   2
   0  -1 -22 11.8677 44.8654   4
   0   1 -22 36.0720 52.4335   4
   0   1 -23-15.8826 54.4919   4
   0  -1 -23 56.5896 55.9739   4
   0   1  23 30.1708 47.3874   2
   0  -1  23-31.5419 52.4209   2
   0   1 -24 666.275 115.521   4
   0  -1 -24 789.813 127.127   4
   0  -1  24 763.612 121.943   2
   0   1  24 685.209 108.862   2
   0  -1  25 47.1371 48.2349   2
   0   1 -25-34.3319 78.8958   4
   0   1  25 28.5684 46.1358   2
   0  -1 -25-11.1161 55.5697   4
   0  -1  26 325.545 86.1016   2
   0  -1 -26 239.169 86.7897   4
   0   1  26 209.232 67.0703   2
   0   1 -26 123.140 69.0740   4
   0   1  27 4.26081 50.4856   2
   0  -1  27 24.4825 60.3763   2
   0  -1 -27-39.8612 84.3879   4
   0   1 -27-50.5457 67.8475   4
   0   1 -28-104.505 88.0315   4
   0  -1  28 10.4250 54.3859   2
   0  -1 -28 47.8730 63.3927   4
   0   1  28-30.3433 71.3690   2
   0  -1 -29 371.627 92.3823   4
   0  -1  29 584.532 121.023   2
   0   1 -29 264.019 61.7288   4
   0   1  29 458.593 103.869   2
   0  -1 -30-98.2736 93.2465   4
   0   1  30 19.0909 68.2603   2
   0   1 -30-117.501 104.667   4
   0  -1  30-5.87992 54.7851   2
   0   1 -31-140.528 107.038   4
   0  -1 -31-185.384 104.100   4
   0  -1  31-2.31895 71.4157   2
   0   1  31 13.4579 66.3874   2
   0   1  32 92.8617 60.9493   2
   0  -1  32 113.296 70.1598   2
   0  -1 -32 140.616 71.3831   4
   0   1 -32-35.1358 84.8982   4
   0  -1 -33 31.5258 86.7188   4
   0  -1  33 65.4793 75.4781   2
   0   1 -33 2.73061 69.5153   4
   0   1  33 5.23451 61.8336   2
   0   1 -34 267.634 112.293   4
   0   1  34 406.873 114.064   2
   0  -1  34 278.795 103.272   2
   0  -1 -34 188.301 102.729   4
   0  -1  35 409.855 123.595   2
   0   1 -35 557.467 140.398   4
   0   1  35 579.329 136.211   2
   0  -1 -35 435.514 147.316   4
   0  -1 -36 69.5516 113.803   4
   0   1  36 29.5233 71.8614   2
   0   1 -36 280.947 139.552   4
   0  -1  36 12.4752 73.5953   2
   0   1  37-68.3244 81.4841   2
   0  -1  37 17.4921 73.4617   2
   0   1 -37 190.772 100.425   4
   0  -1 -37-36.6380 85.8809   4
   0   1 -38 665.594 167.000   4
   0  -1 -38 982.083 195.518   4
   0  -1  38 484.930 132.357   2
   0  -1  39-47.4061 96.8833   2
   0   1 -39 92.9710 106.865   4
   0  -1 -39-76.4061 92.6683   4
   0   1 -40 109.353 134.291   4
   0  -1 -40 178.783 106.680   4
   0  -2   4 5427.09 141.305   4
   0  -2  -4 6120.81 134.169   4
   0   2  -4 6066.96 143.382   2
   0   2  -4 5399.90 138.002   4
   0  -2   4 5904.32 141.098   2
   0   2   4 6147.97 135.058   4
   0   2  -5 5575.98 147.767   4
   0  -2   5 5382.82 148.415   2
   0   2   5 5675.36 115.508   2
   0  -2  -5 5819.13 115.441   2
   0   2   5 5803.32 145.160   4
   0  -2  -5 5877.43 144.558   4
   0  -2   5 5244.48 149.216   4
   0   2  -5 5625.97 150.947   2
   0  -2   6 1798.52 98.8886   2
   0  -2  -6 1453.41 81.2455   4
   0  -2  -6 1625.06 71.9548   2
   0  -2   6 1520.48 84.9717   4
   0   2  -6 1449.00 84.7237   4
   0   2   6 1525.76 83.9535   4
   0   2   6 1576.71 71.7245   2
   0   2  -6 1755.68 94.3430   2
   0  -2  -7 2040.19 101.544   4
   0   2   7 2097.16 103.604   4
   0   2  -7 2325.21 113.447   2
   0   2  -7 1954.69 108.769   4
   0   2   7 2130.17 90.1308   2
   0  -2  -7 2007.94 88.4730   2
   0  -2   7 2288.12 115.206   2
   0  -2   7 2148.71 105.886   4
   0   2  -8 4806.92 175.340   4
   0  -2   8 4814.31 169.905   2
   0   2   8 5148.00 169.220   4
   0  -2  -8 4843.20 143.542   2
   0   2  -8 5034.74 173.306   2
   0   2   8 4741.86 143.727   2
   0  -2   8 4883.11 175.697   4
   0  -2  -8 4451.15 158.702   4
   0  -2  -9 631.631 60.4146   2
   0   2   9 614.699 66.1932   4
   0   2  -9 715.898 76.4995   2
   0   2   9 680.047 64.3723   2
   0  -2   9 685.307 77.2873   2
   0   2  -9 656.802 74.8709   4
   0  -2   9 462.838 62.3375   4
   0   2 -10 553.877 72.0315   4
   0   2  10 719.431 75.7244   4
   0  -2  10 679.510 76.2901   4
   0  -2 -10 985.413 95.8494   4
   0   2  10 659.809 63.4068   2
   0  -2  10 731.137 80.6217   2
   0   2 -10 629.366 70.5831   2
   0  -2 -10 690.650 65.3962   2
   0  -2  11 622.829 78.3072   2
   0  -2  11 582.980 73.3940   4
   0  -2 -11 609.313 65.2147   2
   0  -2 -11 496.787 67.2162   4
   0   2  11 608.747 64.4063   2
   0   2  11 556.871 69.2646   4
   0   2 -11 506.227 70.3207   4
   0   2 -11 484.983 66.9724   2
   0  -2 -12 22.5024 26.4417   2
   0   2  12 45.3979 30.9888   2
   0   2  12 2.52763 29.0112   4
   0  -2  12 54.8128 40.8211   2
   0  -2 -12 93.2856 48.1208   4
   0   2 -12-15.7541 37.6897   4
   0   2 -12 38.0141 33.5669   2
   0  -2  12 24.1034 54.5087   4
   0   2 -13 4.23215 37.7615   4
   0  -2  13 63.1929 43.0983   2
   0  -2 -13 52.5410 42.6742   4
   0  -2 -13 42.8258 29.3999   2
   0   2  13 23.6305 31.4174   2
   0  -2  13 71.4490 49.3899   4
   0   2 -13 24.9755 28.8005   2
   0   2  13 39.1368 36.3300   4
   0  -2  14 140.305 59.1926   2
   0   2 -14 80.2844 36.0461   2
   0  -2 -14 130.287 50.7537   2
   0   2 -14 0.57771 46.8544   4
   0   2  14 84.7106 47.0471   2
   0  -2 -14 78.7011 50.8286   4
   0  -2  14 83.2872 45.1695   4
   0   2  14 82.6319 37.5575   4
   0  -2 -15 8850.71 281.362   2
   0   2  15 8122.97 267.948   2
   0  -2 -15 8206.35 293.728   4
   0  -2  15 8483.20 300.993   2
   0   2  15 9385.14 319.698   4
   0   2 -15 8063.86 301.680   4
   0   2  16 8422.98 283.400   2
   0  -2 -16 8345.61 304.250   4
   0  -2  16 8524.89 313.156   2
   0   2 -16 8554.12 313.776   4
   0  -2 -16 8592.74 287.993   2
   0   2 -17 4580.92 253.898   4
   0  -2 -17 5085.18 246.837   4
   0  -2  17 4751.99 243.230   2
   0  -2 -17 5367.89 237.461   2
   0   2  17 4855.08 224.197   2
   0  -2  18 5777.23 273.973   2
   0  -2 -18 5651.86 269.712   4
   0   2  18 5807.88 253.504   2
   0   2 -18 6313.45 292.231   4
   0  -2 -19 1957.33 170.483   4
   0   2  19 1791.65 147.367   2
   0   2 -19 1749.30 169.550   4
   0  -2  19 1872.05 162.094   2
   0   2  20 333.573 70.2710   2
   0  -2  20 335.734 74.5984   2
   0   2 -20 283.261 77.4232   4
   0  -2 -20 391.590 96.4993   4
   0   2 -21 1043.75 138.495   4
   0  -2  21 917.021 121.165   2
   0   2  21 1082.56 121.156   2
   0  -2 -21 987.959 133.618   4
   0  -2  22 2436.54 197.624   2
   0   2  22 2638.11 192.061   2
   0  -2 -22 2602.34 207.285   4
   0   2 -22 2479.38 205.094   4
   0  -2 -23 372.315 96.2246   4
   0   2 -23 236.899 71.0962   4
   0   2  23 201.778 62.9800   2
   0  -2  23 195.295 73.2549   2
   0  -2  24 1228.23 150.381   2
   0   2 -24 1223.86 152.276   4
   0  -2 -24 1518.37 168.175   4
   0   2  24 1318.34 144.514   2
   0   2  25 269.840 75.5412   2
   0  -2  25 379.330 93.1602   2
   0   2 -25 182.009 61.1540   4
   0  -2 -25 311.705 98.1730   4
   0  -2  26 40.4349 48.6912   2
   0  -2 -26 46.4200 60.7342   4
   0   2  26-37.4573 63.5724   2
   0   2 -26-111.460 105.769   4
   0  -2 -27-3.60774 63.5635   4
   0   2 -27-182.364 102.953   4
   0   2  27-15.3703 61.5550   2
   0  -2  27-96.8845 71.7842   2
   0   2  28 27.5672 65.3999   2
   0  -2 -28-6.10833 77.9103   4
   0   2 -28-149.706 108.183   4
   0  -2  28-94.0262 78.0318   2
   0   2 -29 56.5321 71.9438   4
   0  -2 -29 76.1909 80.0820   4
   0  -2  29 201.077 87.9266   2
   0   2  29 218.443 79.6988   2
   0  -2  30 170.718 77.6001   2
   0   2 -30 76.4202 73.2411   4
   0  -2 -30 4.20106 89.7347   4
   0   2  30 134.141 56.5952   2
   0   2  31 853.331 142.832   2
   0  -2 -31 814.327 147.379   4
   0   2 -31 448.913 120.145   4
   0  -2  31 724.145 142.186   2
   0   2  32 96.8801 76.0606   2
   0  -2  32 62.8559 70.0335   2
   0  -2 -32 69.4454 74.7402   4
   0   2 -32-40.6064 101.066   4
   0   2 -33 1281.92 199.446   4
   0  -2 -33 1553.30 205.562   4
   0  -2  33 1221.01 189.246   2
   0   2  33 1426.81 185.285   2
   0   2  34 479.953 123.797   2
   0  -2  34 480.721 135.904   2
   0  -2 -34 277.103 109.971   4
   0   2 -34 508.927 141.575   4
   0   2  35 442.627 120.363   2
   0   2 -35 801.613 172.736   4
   0  -2 -35 475.336 136.067   4
   0  -2  35 307.216 116.481   2
   0   2  36 539.258 136.326   2
   0   2 -36 577.113 168.532   4
   0  -2  36 320.288 121.775   2
   0  -2 -36 439.395 134.781   4
   0  -2 -37 34.0249 77.8713   4
   0  -2  37-116.338 94.3351   2
   0   2 -38 280.045 132.731   4
   0  -2  38 164.523 102.279   2
   0  -2 -38 179.437 112.939   4
   0  -2 -39 176.141 116.400   4
   0  -2  39-54.1290 91.0414   2
   0   2 -39 346.899 138.636   4
   0   2 -40 382.897 146.837   4
   0  -3  -3 616.883 42.2240   4
   0   3  -3 638.593 47.1221   2
   0  -3   3 548.103 45.7768   2
   0   3  -3 496.561 43.6836   4
   0  -3   3 538.266 44.2747   4
   0   3  -4 9019.46 185.588   2
   0   3  -4 8420.51 179.176   4
   0  -3   4 9134.47 184.239   4
   0   3   4 8857.45 170.271   4
   0  -3  -4 8770.57 168.245   4
   0  -3   4 8623.08 181.797   2
   0   3   5 2103.91 91.7500   4
   0  -3   5 1829.15 96.3271   4
   0  -3   5 2395.87 108.845   2
   0   3  -5 1978.57 94.2687   4
   0   3   5 2187.07 65.5982   2
   0   3  -5 2220.80 102.493   2
   0  -3  -5 2130.49 64.7894   2
   0  -3  -5 2048.39 90.1498   4
   0  -3  -6 38634.8 310.958   2
   0   3   6 38812.8 310.482   2
   0  -3  -6 38043.5 409.179   4
   0   3  -6 39346.2 445.321   2
   0   3   6 40839.7 424.542   4
   0   3  -6 38536.7 434.330   4
   0  -3   6 40745.5 445.956   4
   0  -3   6 37970.9 439.755   2
   0   3  -7 16932.8 309.642   4
   0  -3  -7 17200.5 296.757   4
   0   3  -7 18217.9 322.442   2
   0  -3   7 17506.9 317.193   2
   0  -3  -7 17267.2 233.286   2
   0  -3   7 17825.6 314.683   4
   0   3   7 17421.6 297.292   4
   0   3   7 17208.2 234.432   2
   0  -3  -8 2933.66 129.594   4
   0  -3   8 3182.10 146.671   2
   0   3   8 3168.53 111.678   2
   0   3  -8 3213.47 144.841   2
   0  -3  -8 3059.93 110.294   2
   0  -3   8 3117.25 141.091   4
   0   3  -8 2706.54 134.888   4
   0   3   8 3223.05 136.916   4
   0  -3   9 1994.98 120.586   2
   0  -3  -9 1953.88 94.6392   2
   0  -3  -9 2045.14 115.671   4
   0   3  -9 1980.06 118.430   4
   0  -3   9 1989.69 121.249   4
   0   3   9 2143.40 116.356   4
   0   3   9 2070.56 98.5940   2
   0   3  -9 2104.07 124.102   2
   0  -3 -10 259.667 51.5236   4
   0  -3  10 290.396 57.1888   2
   0   3  10 269.660 49.3496   4
   0  -3 -10 307.103 46.6542   2
   0   3  10 293.744 45.8818   2
   0  -3  10 239.806 50.3277   4
   0   3 -10 304.061 56.2895   2
   0   3 -10 167.588 47.5155   4
   0   3  11 426.495 54.2104   2
   0   3  11 359.668 55.3822   4
   0  -3  11 318.629 59.2756   4
   0  -3  11 403.181 66.0268   2
   0   3 -11 361.865 63.6839   4
   0  -3 -11 414.930 54.1718   2
   0   3 -11 415.884 63.3136   2
   0  -3 -11 406.641 63.3319   4
   0   3 -12 1971.85 139.659   4
   0  -3  12 2124.15 141.318   4
   0   3  12 2016.94 114.904   2
   0  -3 -12 2203.52 121.282   2
   0   3  12 2190.57 140.248   4
   0  -3 -12 2236.95 137.767   4
   0  -3  12 2079.84 138.635   2
   0   3 -12 2222.19 142.724   2
   0   3  13 1646.62 110.741   2
   0   3 -13 1433.21 122.120   4
   0  -3 -13 1787.17 113.142   2
   0  -3  13 1517.71 125.429   2
   0  -3 -13 1502.92 120.338   4
   0  -3  13 1512.13 125.497   4
   0   3 -13 1664.87 130.211   2
   0   3  13 1753.95 127.635   4
   0  -3  14 5102.77 227.599   4
   0  -3 -14 4790.33 192.269   2
   0   3  14 4412.01 185.907   2
   0   3 -14 4241.10 210.898   4
   0  -3 -14 4443.52 209.843   4
   0  -3  14 4388.03 215.330   2
   0   3  14 4833.72 217.007   4
   0  -3  15 774.447 105.163   2
   0   3  15 595.659 81.2395   4
   0  -3 -15 630.455 90.3846   4
   0   3 -15 610.635 85.9185   4
   0  -3 -15 735.449 84.2952   2
   0   3  15 643.418 81.9724   2
   0  -3  16 1740.95 151.115   2
   0  -3 -16 1856.71 133.474   2
   0  -3 -16 1581.86 136.339   4
   0   3  16 1647.91 125.408   2
   0   3 -16 1509.48 142.271   4
   0  -3 -17 54.4636 50.9711   4
   0   3 -17 2.73074 47.4299   4
   0  -3  17 159.069 78.2149   2
   0   3  17 120.759 55.5704   2
   0  -3 -17 200.730 61.5802   2
   0   3  18 231.823 59.4198   2
   0  -3 -18 233.275 46.3306   4
   0   3 -18 268.644 71.0860   4
   0  -3  18 314.612 80.6814   2
   0   3  19 1255.58 118.627   2
   0  -3 -19 1133.33 124.753   4
   0  -3  19 1044.92 123.877   2
   0   3 -19 937.432 117.904   4
   0  -3 -20 42.6900 45.9229   4
   0   3  20-59.3191 54.7316   2
   0   3 -20 1.31954 51.1481   4
   0  -3  20-49.4222 60.8260   2
   0  -3  21 368.945 76.8626   2
   0  -3 -21 474.340 93.5326   4
   0   3  21 483.911 83.5501   2
   0   3 -21 381.791 85.6691   4
   0   3 -22 663.942 112.209   4
   0  -3  22 727.057 114.668   2
   0  -3 -22 1109.32 141.908   4
   0   3  22 886.015 112.108   2
   0  -3 -23 295.563 87.3932   4
   0  -3  23 147.352 66.8074   2
   0   3  23 139.361 54.8373   2
   0   3 -23 107.761 50.4062   4
   0  -3  24 63.5595 61.6870   2
   0   3 -24-48.5024 80.5024   4
   0   3  24-12.9738 40.7476   2
   0  -3 -24 95.7424 77.7420   4
   0   3  25 842.154 122.534   2
   0  -3  25 1049.47 148.888   2
   0   3 -25 733.775 128.600   4
   0  -3 -25 1075.56 152.011   4
   0  -3 -26 648.769 129.436   4
   0   3  26 575.012 102.557   2
   0  -3  26 448.102 104.468   2
   0   3 -26 331.181 82.3887   4
   0  -3 -27 26.8617 75.0843   4
   0  -3  27-44.5800 73.4616   2
   0   3  27 12.5468 53.1914   2
   0  -3 -28 38.4753 61.4365   4
   0   3  28-8.85575 64.4575   2
   0   3 -28-109.526 106.001   4
   0  -3  28-24.5717 68.8974   2
   0   3  29-55.9790 62.7346   2
   0  -3  29 38.4575 55.7577   2
   0  -3 -29-40.6620 79.8993   4
   0   3 -29-45.8889 87.6807   4
   0   3 -30-48.5620 92.1751   4
   0   3  30 3.23763 48.8213   2
   0  -3 -30 62.8418 88.4386   4
   0  -3  30 7.37362 55.7397   2
   0   3 -31 61.4050 93.7900   4
   0  -3 -31 55.4963 119.377   4
   0  -3  31 120.981 83.8932   2
   0   3  31 32.3740 65.1142   2
   0   3 -32 480.584 132.422   4
   0  -3 -32 452.448 129.187   4
   0   3  32 376.832 100.788   2
   0  -3  32 416.488 120.769   2
   0   3  33 110.438 67.4913   2
   0  -3 -33 67.5831 99.9971   4
   0  -3  33-33.5986 67.9934   2
   0   3 -33 183.621 106.679   4
   0   3 -34 311.348 120.108   4
   0  -3  34 263.257 96.4641   2
   0   3  34 289.085 96.5280   2
   0  -3 -34 263.986 100.394   4
   0  -3  35 1120.92 185.228   2
   0   3  35 1214.85 176.624   2
   0   3 -35 1406.28 219.471   4
   0  -3 -35 1104.86 194.369   4
   0  -3  36 989.775 186.353   2
   0  -3 -36 849.971 177.940   4
   0   3 -36 1106.14 199.775   4
   0   3 -37 496.181 170.182   4
   0  -3  37-131.123 94.5211   2
   0  -3 -37 193.943 113.727   4
   0  -3  38 97.2039 88.0471   2
   0  -3 -38 125.491 110.188   4
   0   3 -38 422.567 168.669   4
   0  -3  39-179.128 96.4214   2
   0  -3 -39 18.2648 80.1040   4
   0  -3  40 409.825 140.124   2
   0   4  -1 3289.86 95.9998   6
   0  -4   1 3161.02 94.4277   6
   0   4   2 11112.0 190.963   1
   0  -4  -2 11856.7 196.485   1
   0  -4  -2 11767.0 201.543   6
   0  -4   2 11581.4 185.752   2
   0   4  -2 11728.4 180.105   6
   0   4  -2 12209.9 189.521   2
   0   4   2 11842.9 201.598   6
   0  -4   2 10357.3 180.360   6
   0  -4   3 136.255 35.3711   2
   0   4  -3 14.9965 18.6960   4
   0  -4  -3 26.7095 18.7325   1
   0  -4   3 22.2276 20.5284   4
   0   4  -3 102.854 28.4582   2
   0  -4  -3 34.9484 18.8715   6
   0  -4   4 10293.7 210.048   2
   0  -4  -4 10457.8 195.398   4
   0   4  -4 10491.7 210.749   2
   0  -4   4 10357.2 207.568   4
   0  -4  -4 10324.7 203.966   1
   0   4  -4 9592.01 207.166   4
   0   4   5 940.239 63.6846   4
   0  -4   5 1264.25 87.7538   2
   0   4  -5 932.542 70.9067   4
   0  -4  -5 964.850 63.9820   4
   0  -4   5 998.253 73.6878   4
   0   4  -5 1158.65 79.7857   2
   0   4  -6 8909.37 219.705   4
   0  -4   6 9325.19 233.125   4
   0  -4   6 9493.32 232.698   2
   0   4  -6 9856.97 234.211   2
   0  -4  -6 9254.17 210.484   4
   0   4   6 9528.94 213.513   4
   0  -4  -6 9533.32 140.081   2
   0   4   6 9383.05 138.248   2
   0  -4  -7 264.715 31.3338   2
   0  -4   7 484.572 76.2493   2
   0   4   7 268.985 34.5682   2
   0  -4  -7 212.248 36.1317   4
   0   4   7 250.792 43.0468   4
   0   4  -7 394.809 64.9896   2
   0   4  -7 170.795 46.5339   4
   0  -4   7 158.266 42.2194   4
   0   4   8 2837.97 132.953   4
   0   4  -8 2928.75 143.052   2
   0   4  -8 2330.56 137.180   4
   0  -4  -8 2811.76 97.8049   2
   0  -4   8 2652.69 136.578   4
   0  -4   8 2864.11 144.265   2
   0   4   8 2625.92 96.3990   2
   0  -4  -8 2568.43 123.503   4
   0   4   9 740.107 73.2008   4
   0   4  -9 629.492 71.9897   4
   0  -4   9 927.629 91.7192   2
   0   4   9 730.242 57.9689   2
   0   4   9 701.022 37.6248   3
   0  -4   9 672.239 85.6200   4
   0   4  -9 839.230 83.8107   2
   0  -4  -9 818.775 77.9422   4
   0  -4  -9 881.093 60.9785   2
   0   4 -10 3316.50 166.557   2
   0  -4 -10 3055.28 151.958   4
   0  -4  10 3056.27 160.761   2
   0   4  10 3233.61 154.312   4
   0  -4 -10 3214.81 124.487   2
   0   4 -10 3098.53 161.769   4
   0  -4  10 3314.86 166.173   4
   0   4  10 3154.88 120.903   2
   0   4 -11 730.323 85.5512   4
   0  -4 -11 688.208 74.4609   4
   0   4 -11 888.035 92.4776   2
   0   4  11 769.437 80.0172   4
   0  -4  11 732.393 89.0265   4
   0   4  11 821.111 69.2312   2
   0  -4 -11 845.728 68.7673   2
   0  -4  11 764.130 87.5288   2
   0  -4  12 1619.15 128.731   2
   0  -4  12 1352.91 120.669   4
   0   4 -12 1266.81 114.495   4
   0   4  12 1518.69 97.9221   2
   0   4 -12 1594.17 126.892   2
   0   4  12 1463.29 115.748   4
   0  -4 -12 1501.87 117.626   4
   0  -4 -12 1745.58 103.936   2
   0  -4  13 724.081 90.6053   2
   0  -4 -13 644.440 81.9139   4
   0  -4  13 490.239 75.9379   4
   0   4  13 679.675 85.6222   4
   0  -4 -13 680.640 70.8348   2
   0   4 -13 574.827 86.0224   4
   0   4  13 666.028 70.0823   2
   0   4 -13 707.505 90.0171   2
   0   4 -14 3667.39 206.855   4
   0  -4 -14 4036.82 202.498   4
   0   4  14 3703.61 165.120   2
   0   4  14 4029.67 201.042   4
   0  -4 -14 4128.29 173.643   2
   0  -4  14 3707.00 204.397   2
   0   4  15 2502.96 168.210   4
   0  -4  15 2397.41 170.783   2
   0   4  15 2379.46 139.210   2
   0   4 -15 2148.19 161.640   4
   0  -4 -15 2511.49 167.935   4
   0  -4 -15 2575.58 144.020   2
   0  -4 -16 3725.67 182.297   2
   0   4 -16 3076.88 204.005   4
   0  -4  16 3415.26 207.949   2
   0  -4 -16 3658.16 209.324   4
   0   4  16 3432.20 174.281   2
   0   4  17 11145.6 320.320   2
   0  -4 -17 11935.6 335.913   2
   0   4 -17 10325.1 379.087   4
   0  -4  17 11627.5 388.986   2
   0  -4 -17 11823.6 371.092   4
   0  -4 -18 176.049 75.7737   4
   0   4 -18 232.620 75.1675   4
   0  -4  18 337.667 83.1914   2
   0   4  18 384.093 74.7524   2
   0  -4 -18 277.614 63.6386   2
   0  -4 -19 112.176 49.9614   4
   0  -4  19 113.403 45.2437   2
   0   4  19 158.352 52.9310   2
   0   4 -19 73.8933 49.0778   4
   0  -4  20 595.099 92.6259   2
   0  -4 -20 682.318 103.809   4
   0   4 -20 610.046 103.754   4
   0   4  20 626.994 88.5407   2
   0  -4 -21 818.371 110.171   4
   0   4  21 1015.92 115.259   2
   0  -4  21 925.341 127.996   2
   0   4 -21 833.996 126.206   4
   0   4  22 790.217 106.802   2
   0  -4 -22 1388.18 167.305   4
   0  -4  22 840.840 127.439   2
   0   4 -22 602.842 114.717   4
   0  -4  23 417.572 98.6646   2
   0   4  23 288.612 69.9532   2
   0  -4 -23 345.338 86.0963   4
   0   4 -23 346.728 87.3439   4
   0  -4  24 85.4186 78.4421   2
   0   4 -24-39.4614 73.0225   4
   0  -4 -24 102.086 78.3642   4
   0   4  24 62.1071 49.8291   2
   0   4  25 74.4535 60.9948   2
   0   4 -25-204.703 94.5430   4
   0  -4  25 126.925 82.5089   2
   0  -4 -25 60.6225 81.9063   4
   0  -4 -26 405.416 134.901   4
   0   4 -26 15.2099 85.3907   4
   0  -4  26 157.174 78.2220   2
   0   4  26 183.918 65.9473   2
   0  -4  27 346.431 98.2061   2
   0   4  27 319.464 75.5207   2
   0  -4 -27 682.405 141.870   4
   0   4 -27 260.349 87.0322   4
   0   4 -28 195.235 65.7742   4
   0  -4 -28 319.633 116.240   4
   0  -4  28 298.181 97.3899   2
   0   4  28 255.958 83.2340   2
   0  -4  29 449.740 116.390   2
   0  -4 -29 484.507 120.631   4
   0   4  29 311.033 88.6767   2
   0   4 -29 347.499 98.6786   4
   0  -4 -30 949.741 164.184   4
   0  -4  30 955.734 159.694   2
   0   4  30 972.405 142.046   2
   0   4 -30 768.933 146.378   4
   0  -4 -31 2189.90 239.362   4
   0   4  31 2380.98 221.995   2
   0   4 -31 2523.24 262.112   4
   0  -4  31 2408.86 250.583   2
   0  -4  32 202.767 94.6623   2
   0   4  32 143.633 73.9321   2
   0   4 -32 84.1025 89.3221   4
   0  -4 -32 190.237 91.5610   4
   0  -4  33 219.264 89.1273   2
   0   4 -33 268.167 107.924   4
   0  -4 -33 173.398 88.6146   4
   0   4  33 165.887 69.5001   2
   0  -4 -34 14.9084 70.4799   4
   0  -4  34-26.6912 85.4110   2
   0   4  34 106.441 70.9459   2
   0  -4 -35 257.491 108.454   4
   0  -4  35 442.757 136.713   2
   0   4 -35 703.785 172.810   4
   0  -4 -36 130.779 93.1308   4
   0  -4  36 22.5121 86.6157   2
   0  -4 -37 509.843 161.716   5
   0  -4 -37 531.219 155.165   4
   0   4 -37 1111.16 210.272   4
   0  -4  37 299.773 119.137   2
   0   4 -38 450.771 158.357   4
   0  -4 -38 225.403 133.780   4
   0  -4  38 174.359 109.956   2
   0  -4  39-12.3663 78.1504   2
   0  -4 -39-157.147 127.567   4
   0  -4  40 461.609 146.581   2
   0   5   0 42.5751 27.2848   1
   0   5   0 29.6832 18.9171   2
   0   5   0 105.634 30.8929   6
   0  -5   0 85.9838 25.4954   2
   0  -5   0 90.5747 29.5051   6
   0   5  -1 2858.68 101.483   6
   0   5   1 3121.72 106.675   1
   0  -5  -1 3205.84 109.040   1
   0   5  -1 2987.84 92.2312   2
   0  -5  -1 3056.21 109.875   6
   0   5   1 2988.29 107.744   6
   0  -5   1 3052.85 93.5961   2
   0  -5   1 2993.38 103.850   6
   0  -5  -2 14459.5 238.239   1
   0   5  -2 13247.5 219.310   6
   0  -5   2 14418.0 221.854   6
   0   5  -2 14337.0 219.310   2
   0  -5   2 13900.5 218.498   2
   0  -5  -2 14657.5 248.619   6
   0   5   2 13858.2 232.086   1
   0   5   2 14118.2 240.216   6
   0   5   3 372.075 46.5771   6
   0  -5   3 422.346 46.0053   4
   0  -5   3 570.857 55.1404   2
   0  -5  -3 385.366 44.4936   6
   0   5  -3 482.575 49.4075   2
   0   5  -3 358.174 41.0307   6
   0  -5  -3 446.304 29.0179   5
   0   5   3 465.521 49.2546   1
   0  -5  -3 493.468 49.1859   1
   0  -5  -4 1833.71 61.8136   3
   0  -5   4 1871.60 95.5317   4
   0  -5   4 1967.24 100.756   2
   0   5  -4 1766.52 94.8726   4
   0   5  -4 2005.53 100.349   2
   0  -5  -4 1923.10 99.1792   6
   0  -5  -4 1866.70 95.3447   1
   0   5  -5 16055.5 297.064   4
   0  -5  -5 16882.9 277.236   4
   0  -5   5 16290.2 296.592   2
   0   5  -5 17255.2 302.470   2
   0  -5  -5 17160.3 294.581   1
   0  -5  -5 17441.8 311.615   6
   0  -5  -5 16669.8 172.515   3
   0  -5   5 17117.5 303.141   4
   0  -5   6 5289.38 177.777   4
   0  -5  -6 4842.34 158.462   4
   0   5  -6 5618.12 183.326   2
   0  -5   6 5377.87 182.370   2
   0   5  -6 4674.07 170.966   4
   0  -5  -7 14538.8 285.880   4
   0  -5  -7 15299.8 185.376   2
   0   5  -7 15410.1 318.308   2
   0  -5   7 14826.7 318.027   4
   0   5  -7 14633.9 314.309   4
   0  -5   7 14634.1 313.751   2
   0   5   7 15188.9 295.746   4
   0   5   7 14733.5 180.390   2
   0   5  -8 18176.8 361.594   2
   0   5  -8 16710.1 348.664   4
   0   5   8 18167.1 337.905   4
   0  -5   8 18663.8 364.090   4
   0  -5  -8 18137.9 227.819   2
   0  -5  -8 17335.6 327.296   4
   0  -5   8 16915.0 351.169   2
   0   5   8 17122.3 222.750   2
   0   5  -9 3145.59 159.236   2
   0  -5  -9 3067.68 105.435   2
   0  -5  -9 2603.64 134.494   4
   0   5  -9 2830.44 159.025   4
   0  -5   9 3098.22 158.522   4
   0   5   9 2914.58 104.676   2
   0   5   9 3002.54 144.467   4
   0   5   9 2620.91 69.0105   3
   0  -5   9 3088.56 160.795   2
   0  -5  10 203.409 58.1850   2
   0   5 -10 85.7940 46.7085   4
   0   5  10 111.110 39.3235   4
   0  -5 -10 130.151 41.3368   4
   0   5  10 155.788 36.4221   2
   0  -5  10 59.6626 35.9018   4
   0  -5 -10 170.692 33.3992   2
   0   5  10 84.4354 15.6206   3
   0   5 -10 103.401 48.7397   2
   0   5 -11 880.843 94.3939   2
   0   5  11 875.780 86.2908   4
   0  -5 -11 739.017 83.5057   4
   0  -5 -11 862.401 65.5349   2
   0   5 -11 764.780 88.1273   4
   0   5  11 749.123 63.4475   2
   0  -5  11 718.854 86.2750   2
   0  -5  11 678.908 87.4043   4
   0   5  11 596.320 36.9723   3
   0   5 -12-19.2907 47.3123   4
   0   5  12 8.55304 25.3934   2
   0   5  12 4.56118 11.6434   3
   0  -5 -12-8.15930 36.4690   4
   0  -5  12 16.2379 32.3672   4
   0   5 -12 3.27676 32.5926   2
   0  -5  12 63.7067 50.4896   2
   0   5  12-30.8511 37.4885   4
   0  -5 -12 30.4093 24.6669   2
   0   5  13 215.972 26.2662   3
   0   5 -13 111.231 45.3506   4
   0  -5  13 246.984 56.3949   4
   0   5  13 219.410 44.3134   2
   0   5  13 185.970 45.7615   4
   0  -5 -13 103.216 40.9431   4
   0  -5 -13 298.961 44.7743   2
   0  -5  13 267.083 70.6183   2
   0  -5  14 571.788 91.2082   2
   0   5  14 514.904 61.3615   2
   0   5 -14 473.579 80.3077   4
   0  -5 -14 626.486 70.4205   2
   0   5  14 599.474 45.0113   3
   0   5  14 602.607 82.3365   4
   0  -5 -14 563.068 80.5106   4
   0  -5 -15 1553.10 111.403   2
   0   5  15 1598.33 134.933   4
   0  -5  15 1572.72 142.099   2
   0   5  15 1380.28 104.060   2
   0   5 -15 1183.27 125.012   4
   0  -5 -15 1361.70 125.155   4
   0  -5  16 1598.02 152.209   2
   0  -5 -16 1847.23 156.876   4
   0  -5 -16 1663.72 118.280   2
   0   5 -16 1445.31 139.823   4
   0   5  16 1444.21 110.858   2
   0   5 -17 3597.28 222.323   4
   0  -5 -17 3779.82 184.027   2
   0  -5 -17 3712.17 213.142   4
   0  -5  17 3536.15 224.051   2
   0   5  17 3570.68 179.743   2
   0  -5  18 738.450 111.520   2
   0  -5 -18 1029.91 102.844   2
   0   5 -18 948.449 124.793   4
   0  -5 -18 949.600 122.837   4
   0   5  18 854.891 92.6683   2
   0  -5 -19 1928.69 163.846   4
   0  -5  19 1643.05 159.631   2
   0   5  19 1751.91 135.260   2
   0   5 -19 1543.78 162.231   4
   0  -5 -19 1846.05 138.685   2
   0  -5 -20 131.024 50.1101   4
   0  -5  20 4.94640 45.7442   2
   0   5  20 58.7745 36.1846   2
   0   5 -20 59.1481 57.4832   4
   0  -5 -21 594.130 96.9511   4
   0   5 -21 546.479 109.158   4
   0   5  21 564.358 84.0133   2
   0  -5  21 460.265 95.1147   2
   0   5 -22 135.321 66.5874   4
   0   5  22 214.430 66.9343   2
   0  -5  22 194.833 68.7709   2
   0  -5 -22 177.293 74.4086   4
   0  -5 -23 52.2551 56.0795   4
   0   5  23 173.881 66.7118   2
   0   5 -23 110.797 77.0555   4
   0  -5  23 13.1830 50.7203   2
   0   5  24 4836.24 258.962   2
   0  -5 -24 5170.85 299.924   4
   0   5 -24 4490.61 316.684   4
   0  -5  24 4443.97 294.303   2
   0   5 -25 1332.34 174.547   4
   0  -5  25 1110.75 157.731   2
   0  -5 -25 1349.56 178.138   4
   0   5  25 1374.48 148.742   2
   0  -5  26 3498.00 272.481   2
   0  -5 -26 3340.92 261.307   4
   0   5  26 3417.49 236.648   2
   0   5 -26 3169.43 264.535   4
   0   5  26 3271.44 141.870   3
   0   5 -27 954.851 159.432   4
   0  -5  27 734.172 136.096   2
   0  -5 -27 908.331 151.674   4
   0   5  27 943.272 132.748   2
   0   5 -28 1842.57 209.881   4
   0   5  28 1807.91 182.153   2
   0  -5  28 1618.49 195.315   2
   0  -5 -28 1789.56 205.264   4
   0  -5  29 1248.00 184.414   2
   0   5  29 1586.95 173.974   2
   0   5 -29 1446.67 200.662   4
   0  -5 -29 1553.32 190.814   4
   0  -5  30 432.238 117.430   2
   0   5  30 237.367 81.6255   2
   0   5 -30 480.240 131.157   4
   0  -5 -30 479.061 129.577   4
   0  -5  31 171.892 98.5258   2
   0   5  31 42.2828 54.5484   2
   0   5 -31 199.362 132.871   4
   0  -5 -31 342.761 135.103   4
   0   5  32 57.4988 58.4679   2
   0  -5  32-72.4434 71.8889   2
   0   5 -32-16.7021 74.7888   4
   0  -5 -32-16.4161 67.7985   4
   0   5 -33 253.570 106.612   4
   0   5  33 106.406 61.3542   2
   0  -5 -33 133.019 76.8308   4
   0  -5  33 7.84007 79.1371   2
   0  -5 -34 138.911 85.0294   4
   0  -5  34 56.3494 65.6045   2
   0   5 -34 339.740 135.756   4
   0  -5 -35-65.2332 70.6144   4
   0   5 -35 126.569 95.3494   4
   0  -5  35-128.744 92.3000   2
   0   5 -36 661.875 178.339   4
   0  -5 -36 425.874 128.864   5
   0  -5 -36 286.838 114.537   4
   0  -5  36 306.346 118.972   2
   0  -5 -37 411.885 137.134   4
   0  -5 -37 287.056 119.576   5
   0   5 -37 690.529 183.264   4
   0  -5  37 491.106 144.965   2
   0  -5  38 857.624 183.129   2
   0  -5 -38 679.260 160.051   4
   0   5 -38 892.165 188.615   4
   0   5 -39 246.181 134.157   4
   0  -5  39 168.024 112.146   2
   0  -5  40 267.559 127.482   2
   0   6   0 28099.6 350.230   6
   0   6   0 30328.3 350.484   1
   0  -6   0 30714.6 362.669   6
   0  -6   0 29926.7 276.946   2
   0   6   0 30412.8 277.191   2
   0   6  -1 3283.19 104.146   2
   0   6   1 3255.58 122.501   6
   0  -6  -1 3349.93 80.8182   2
   0   6   1 3212.21 118.855   1
   0  -6  -1 3157.23 117.891   1
   0  -6   1 3369.05 119.668   6
   0   6  -1 3109.96 115.820   6
   0   6   1 3283.69 80.0717   2
   0  -6   1 3291.76 105.989   2
   0  -6  -1 3282.98 124.346   6
   0   6  -2 4350.41 130.004   2
   0   6   2 4102.26 142.632   6
   0  -6   2 4055.60 128.643   2
   0   6   2 4110.97 139.710   1
   0  -6  -2 4397.90 145.646   6
   0   6  -2 4195.12 134.870   6
   0  -6   2 3996.37 128.441   6
   0  -6  -2 4104.20 137.893   1
   0  -6  -3 540.269 55.5446   6
   0  -6   3 496.361 49.7842   6
   0  -6   3 454.631 52.1064   4
   0   6   3 517.071 59.0371   6
   0  -6  -3 524.755 54.2065   1
   0   6  -3 464.021 50.9322   6
   0  -6   3 531.744 57.2420   2
   0   6   3 469.901 54.2016   1
   0  -6  -3 531.185 31.5812   5
   0   6  -3 490.410 52.7471   2
   0  -6   4 15407.8 281.780   2
   0  -6  -4 15888.9 204.269   3
   0   6   4 14694.2 280.077   1
   0  -6   4 16507.4 298.237   4
   0  -6  -4 15858.9 195.343   5
   0   6  -4 16572.3 289.956   2
   0   6  -4 15733.0 266.773   6
   0  -6  -4 16082.8 292.730   1
   0  -6  -4 16717.1 306.217   6
   0   6  -5 6094.64 187.305   2
   0  -6  -5 6095.00 192.492   6
   0   6  -5 5786.48 186.261   4
   0  -6  -5 5780.71 117.028   3
   0  -6   5 5959.56 188.896   2
   0  -6  -5 5565.62 133.336   5
   0  -6   5 5774.81 182.718   4
   0  -6  -5 5667.58 179.785   1
   0  -6  -6 671.464 70.6985   1
   0  -6  -6 746.445 41.7623   3
   0  -6  -6 720.458 67.7401   4
   0   6  -6 787.694 77.3813   2
   0  -6  -6 767.820 75.8731   6
   0  -6   6 755.217 82.8261   4
   0  -6   6 791.958 82.1515   2
   0   6  -6 655.001 71.5577   4
   0   6   7 1.29521 10.6253   2
   0  -6  -7-10.7816 12.0218   3
   0  -6  -7-10.0700 10.2131   2
   0  -6  -7-2.89123 27.1514   4
   0  -6   7 5.51190 28.7121   4
   0   6  -7 15.6529 48.6555   4
   0   6  -7 75.7320 38.6454   2
   0   6  -8 7732.06 246.824   4
   0   6  -8 8665.69 258.120   2
   0   6   8 8036.82 123.322   3
   0   6   8 7951.22 138.768   2
   0  -6  -8 7227.27 117.260   3
   0  -6  -8 8148.73 232.526   4
   0  -6   8 8182.32 250.927   4
   0  -6   8 7960.37 251.824   2
   0   6   8 8623.47 237.717   4
   0  -6  -8 8151.68 140.899   2
   0   6  -9 3276.70 168.034   4
   0   6   9 3433.66 102.803   2
   0  -6  -9 3435.80 158.403   4
   0   6  -9 3508.52 173.244   2
   0  -6   9 3602.88 178.357   2
   0   6   9 3244.33 78.0236   3
   0  -6  -9 3475.93 104.346   2
   0   6   9 3428.07 157.707   4
   0  -6   9 3396.22 169.553   4
   0   6 -10 8572.68 279.831   2
   0   6  10 8391.40 178.097   2
   0   6  10 7994.72 123.758   3
   0   6  10 9175.67 269.422   4
   0  -6 -10 8964.82 181.754   2
   0  -6  10 8924.06 280.520   4
   0  -6  10 8230.45 277.610   2
   0   6 -10 8353.51 268.776   4
   0  -6 -10 8145.54 252.483   4
   0  -6  11 3314.08 185.992   2
   0  -6  11 3178.53 177.719   4
   0   6 -11 3206.05 182.839   4
   0   6 -11 3451.85 186.086   2
   0  -6 -11 3513.75 124.156   2
   0  -6 -11 3222.98 167.874   4
   0   6  11 3505.16 173.804   4
   0   6  11 2906.40 77.9085   3
   0   6  11 3166.20 120.277   2
   0  -6 -12 4003.74 140.491   2
   0   6  12 3999.84 191.381   4
   0   6  12 3327.55 86.4796   3
   0   6  12 3577.35 135.641   2
   0  -6  12 3895.05 203.290   2
   0  -6  12 3996.83 202.779   4
   0   6 -12 3547.79 195.989   4
   0  -6 -12 3586.99 180.505   4
   0   6  13 48.9204 14.2988   3
   0   6 -13 352.884 83.2945   4
   0  -6  13 70.8397 46.1537   2
   0  -6 -13 136.635 34.7415   2
   0   6  13 68.7942 39.1591   4
   0  -6 -13 26.6498 34.0664   4
   0   6  13 76.3214 27.8053   2
   0  -6 -14 590.269 65.6912   2
   0  -6  14 579.458 90.0466   2
   0   6 -14 457.033 82.9408   4
   0   6  14 494.595 59.8862   2
   0   6  14 476.457 37.4396   3
   0   6  14 516.987 77.3905   4
   0  -6 -14 454.743 72.7759   4
   0   6  15 965.677 84.9945   2
   0   6  15 829.729 50.0692   3
   0  -6  15 887.346 113.113   2
   0  -6 -15 836.161 97.3800   4
   0   6 -15 807.429 111.490   4
   0  -6 -15 1132.05 91.4592   2
   0   6  16 1828.40 76.7293   3
   0  -6 -16 1747.88 147.402   4
   0  -6  16 1920.85 164.269   2
   0  -6 -16 2215.27 129.956   2
   0   6 -16 1862.62 163.533   4
   0   6  16 1988.45 123.663   2
   0   6 -17 2886.93 204.032   4
   0  -6  17 2770.42 201.140   2
   0  -6 -17 2961.69 159.786   2
   0   6  17 2605.40 94.7229   3
   0   6  17 3028.66 158.692   2
   0  -6 -17 2796.71 188.721   4
   0  -6 -18 887.788 91.6793   2
   0   6  18 799.513 90.0361   2
   0   6 -18 752.500 114.465   4
   0  -6 -18 927.466 120.460   4
   0   6  18 788.032 54.0086   3
   0  -6  18 817.617 122.840   2
   0  -6  19 344.588 87.5969   2
   0  -6 -19 346.855 92.8932   4
   0  -6 -19 319.069 57.7844   2
   0   6  19 327.547 64.3768   2
   0   6  19 248.043 33.9136   3
   0   6 -19 193.289 69.7678   4
   0  -6  20 888.508 122.901   2
   0  -6 -20 953.696 103.111   2
   0   6  20 893.250 62.2717   3
   0  -6 -20 1101.73 129.958   4
   0   6  20 950.394 102.266   2
   0   6 -20 1116.29 142.586   4
   0  -6  21 43.2544 48.2864   2
   0   6  21 44.6160 21.0123   3
   0   6 -21 156.934 73.6510   4
   0  -6 -21 59.9811 56.1811   4
   0   6  21 52.5069 38.3216   2
   0   6  22 504.434 49.7614   3
   0  -6 -22 582.579 107.618   4
   0   6  22 551.364 81.4386   2
   0  -6  22 497.581 104.635   2
   0   6 -22 508.454 107.118   4
   0  -6 -23 263.232 87.4931   4
   0  -6  23 117.590 61.7947   2
   0   6  23 112.641 54.1938   2
   0   6 -23 32.0851 53.6808   4
   0   6  23 154.998 30.5709   3
   0  -6  24 123.127 82.3782   2
   0   6 -24 57.8053 95.8043   4
   0   6  24-5.41372 39.4036   2
   0   6  24 15.1537 15.9412   3
   0  -6 -24 51.5227 56.6948   4
   0   6  25 428.195 49.3520   3
   0  -6  25 460.144 115.140   2
   0   6 -25 416.081 111.252   4
   0  -6 -25 329.928 97.8470   4
   0   6  25 403.719 83.4469   2
   0   6 -26 783.558 145.733   4
   0   6  26 845.359 118.556   2
   0  -6  26 878.969 150.984   2
   0  -6 -26 856.025 155.090   4
   0  -6  27 448.933 124.640   2
   0   6  27 391.466 88.6074   2
   0   6 -27 324.676 119.645   4
   0  -6 -27 617.074 126.091   4
   0   6 -28 136.844 84.5407   4
   0  -6  28 97.9405 89.6121   2
   0   6  28 88.3523 49.8411   2
   0  -6 -28 132.755 90.0829   4
   0  -6 -29 1376.69 188.172   4
   0  -6  29 1155.31 175.767   2
   0   6  29 1107.00 149.749   2
   0   6 -29 1084.95 186.886   4
   0   6 -30 349.552 122.672   4
   0   6  30 1.86244 53.7714   2
   0  -6  30 110.834 77.8406   2
   0  -6 -30 106.082 100.857   4
   0   6 -31 456.218 133.784   4
   0   6  31 488.500 106.238   2
   0  -6 -31 402.280 128.687   4
   0  -6  31 409.871 118.932   2
   0   6  32 68.8063 56.1607   2
   0  -6 -32-48.1251 78.4096   4
   0   6 -32 85.4143 88.3538   4
   0  -6  32-102.797 97.5451   2
   0  -6  33 144.348 90.4186   2
   0  -6 -33 246.186 98.1715   4
   0   6  33 17.1961 60.9542   2
   0   6 -33 336.462 133.631   4
   0   6 -34 118.732 104.747   4
   0  -6  34-26.0610 71.4575   2
   0  -6 -34 66.4632 69.0706   4
   0  -6 -35 152.485 102.176   4
   0  -6  35-96.6524 109.606   2
   0   6 -35 103.186 110.938   4
   0  -6 -36 147.686 87.3052   4
   0  -6  36 104.421 88.6453   2
   0  -6 -36 57.6962 82.3456   5
   0  -6  37-64.5090 90.4680   2
   0   6 -37-42.1011 93.5364   4
   0  -6 -37-14.4129 83.2590   4
   0  -6 -37-129.288 104.391   5
   0  -6 -38 28.9657 92.7087   4
   0  -6  38 55.5838 110.743   2
   0  -6  39 127.552 105.903   2
   0   6 -39 323.787 140.277   4
   0  -6  40-43.3942 88.1105   2
   0   7   0 95.6627 36.5620   2
   0   7   0 164.906 58.3903   6
   0  -7   0 99.5950 44.2344   6
   0  -7   0 236.864 45.3016   2
   0   7   0 265.087 70.4584   1
   0   7  -1 2932.91 119.100   1
   0  -7  -1 3300.69 129.917   1
   0   7   1 3053.62 128.212   6
   0  -7  -1 3105.14 131.030   6
   0   7  -1 3257.92 110.306   2
   0   7   1 3241.40 87.8654   2
   0  -7  -1 3282.89 88.7765   2
   0   7   1 2984.69 126.631   1
   0   7  -1 3016.96 125.034   6
   0  -7   1 3337.58 113.120   2
   0  -7   1 3307.99 130.545   6
   0   7  -2 13426.9 238.839   2
   0   7   2 12729.2 259.937   1
   0  -7   2 12855.6 237.959   2
   0   7   2 12000.1 261.057   6
   0  -7   2 12832.1 252.175   6
   0  -7  -2 13396.0 266.597   1
   0  -7  -2 13240.1 270.163   6
   0   7  -2 12942.4 255.651   6
   0  -7  -3 1236.69 86.6319   6
   0  -7   3 1110.95 75.4465   6
   0   7  -3 1155.33 79.5110   6
   0  -7  -3 1054.20 79.5434   1
   0   7  -3 1147.54 78.3387   2
   0   7   3 948.843 76.7675   1
   0  -7  -3 1060.36 44.3684   5
   0  -7   3 1191.12 82.8574   2
   0   7   3 1079.22 82.7679   6
   0   7   4 1538.71 102.402   6
   0  -7  -4 1635.99 103.214   6
   0   7  -4 1688.25 100.869   2
   0  -7  -4 1614.60 99.3612   1
   0   7  -4 1579.37 97.1611   6
   0   7   4 1576.18 101.517   1
   0  -7  -4 1535.29 61.9238   5
   0  -7   4 1686.06 104.834   4
   0  -7   4 1731.61 108.010   2
   0  -7   5 7969.68 225.339   2
   0   7  -5 8575.95 229.637   2
   0  -7  -5 8547.61 232.171   1
   0  -7   5 8380.12 234.850   4
   0  -7  -5 8163.84 157.591   3
   0  -7  -5 8903.38 242.941   6
   0  -7  -5 8056.02 158.114   5
   0   7  -5 7861.30 207.250   6
   0  -7   6 812.572 92.6496   4
   0   7  -6 350.657 59.6820   4
   0  -7   6 420.569 66.3875   2
   0  -7  -6 388.369 50.3723   4
   0  -7  -6 458.452 45.2387   5
   0   7  -6 442.738 62.0937   2
   0  -7  -6 401.995 57.8553   1
   0  -7  -6 396.776 33.1167   3
   0  -7  -6 452.568 63.7864   6
   0  -7   7 587.267 74.3266   2
   0  -7   7 557.182 75.0195   4
   0  -7  -7 576.824 67.5173   1
   0  -7  -7 607.619 72.1502   6
   0   7  -7 666.506 77.4139   2
   0   7  -7 499.796 68.0117   4
   0  -7  -7 571.709 63.6777   4
   0  -7  -7 620.321 40.6130   3
   0  -7  -8 47.7707 31.6840   1
   0  -7  -8 43.7676 13.6651   2
   0   7   8 42.4140 14.7619   2
   0  -7  -8 51.3337 30.4256   4
   0   7  -8 117.352 45.2580   2
   0  -7  -8 46.4450 13.4926   3
   0  -7   8 174.574 60.3612   2
   0  -7   8 56.2646 34.2827   4
   0   7  -8 108.271 46.2169   4
   0  -7  -9 2951.66 150.965   4
   0   7  -9 3044.22 166.166   2
   0   7  -9 2763.22 163.573   4
   0  -7  -9 2762.23 78.2782   3
   0  -7   9 3190.47 170.746   4
   0   7   9 3069.32 81.9779   3
   0   7   9 3018.52 89.2286   2
   0  -7  -9 3074.51 90.5900   2
   0  -7   9 3005.95 166.951   2
   0  -7 -10 4831.20 125.353   2
   0   7 -10 4746.77 218.034   4
   0  -7  10 5142.10 222.484   4
   0   7  10 4969.98 127.109   2
   0  -7 -10 4956.13 202.544   4
   0  -7  10 5204.75 227.326   2
   0   7  10 4733.75 100.008   3
   0   7 -10 5150.69 222.778   2
   0   7  10 5206.19 207.090   4
   0   7  11 7785.61 261.754   4
   0  -7  11 7260.27 275.765   2
   0  -7 -11 7368.10 253.939   4
   0  -7  11 8111.03 283.249   4
   0   7  11 6920.65 120.540   3
   0   7 -11 7381.36 268.992   4
   0   7  11 7688.18 171.861   2
   0  -7 -11 7511.90 171.736   2
   0   7 -11 7780.06 282.257   2
   0   7 -12 287.975 75.4018   4
   0  -7 -12 215.250 60.3951   4
   0  -7  12 137.832 53.2641   4
   0   7  12 165.095 21.0450   3
   0   7  12 218.639 42.1695   2
   0  -7 -12 225.436 36.2319   2
   0  -7  12 315.792 83.3097   2
   0   7  12 273.289 66.8576   4
   0   7  13 1105.58 49.9075   3
   0  -7 -13 1442.79 87.6421   2
   0  -7 -13 1168.27 113.429   4
   0   7  13 1360.16 118.941   4
   0   7 -13 2382.44 176.994   4
   0  -7  13 1294.34 130.967   2
   0   7  13 1315.90 85.3695   2
   0  -7 -14 957.443 101.613   4
   0   7 -14 1294.93 143.194   4
   0   7  14 998.766 50.0182   3
   0  -7 -14 1195.83 85.4448   2
   0   7  14 1257.21 120.849   4
   0   7  14 1096.75 82.0976   2
   0  -7  14 1164.44 126.237   2
   0   7  15 1543.12 62.5487   3
   0  -7 -15 1640.01 106.605   2
   0  -7  15 1796.95 157.930   2
   0   7 -15 2031.62 172.005   4
   0   7  15 1697.15 105.147   2
   0  -7 -15 1606.80 131.898   4
   0  -7 -16 0.79471 38.8446   4
   0  -7  16 180.444 70.7553   2
   0  -7 -16 151.264 39.6819   2
   0   7 -16 302.640 88.0101   4
   0   7  16 154.544 43.5905   2
   0   7  16 76.2836 16.0051   3
   0   7  17 815.741 49.2477   3
   0   7  17 987.976 88.2234   2
   0   7 -17 926.299 128.408   4
   0  -7 -17 779.673 110.102   4
   0  -7 -17 937.421 88.8180   2
   0  -7  17 971.988 127.313   2
   0  -7 -18 2445.55 144.782   2
   0  -7 -18 2350.55 182.971   4
   0   7 -18 2192.21 193.780   4
   0   7  18 1978.57 78.8363   3
   0   7  18 2240.23 139.025   2
   0  -7  18 2090.88 182.814   2
   0  -7 -19 21.1101 30.1375   2
   0   7  19 26.9405 35.3632   2
   0   7 -19 13.2367 49.0748   4
   0  -7 -19 84.7051 60.2852   4
   0   7  19 9.79826 14.0966   3
   0  -7  19 54.4867 60.1075   2
   0   7  20 35.7924 14.1436   3
   0   7  20 52.2054 39.4979   2
   0  -7 -20 11.8363 28.0882   2
   0   7 -20 68.2063 63.5645   4
   0  -7 -20 160.105 74.3002   4
   0  -7  20 27.9048 53.6715   2
   0  -7  21 66.9761 50.9296   2
   0   7 -21 92.0423 61.0882   4
   0   7  21 41.8066 15.3117   3
   0  -7 -21 184.720 78.6856   4
   0   7  21 62.7323 37.6941   2
   0  -7  22 882.496 127.510   2
   0  -7 -22 1261.21 149.167   4
   0   7 -22 875.022 138.165   4
   0   7  22 768.602 53.9404   3
   0   7  22 753.763 95.4822   2
   0   7 -23 156.439 94.3869   4
   0   7  23 103.172 50.0413   2
   0  -7  23 76.3119 50.3253   2
   0   7  23 81.7963 22.2382   3
   0  -7 -23 194.443 96.9874   4
   0   7  24 1997.97 162.558   2
   0  -7  24 2011.11 202.864   2
   0  -7 -24 2121.76 197.031   4
   0   7  24 1774.49 84.2093   3
   0   7 -24 2076.24 218.514   4
   0   7  25 385.270 41.5848   3
   0  -7  25 557.161 123.371   2
   0   7 -25 626.936 137.452   4
   0   7  25 473.999 89.7090   2
   0  -7 -25 485.358 114.762   4
   0   7 -26 2839.26 252.728   4
   0  -7 -26 2305.96 215.858   4
   0  -7  26 2706.92 248.266   2
   0   7  26 2858.56 205.569   2
   0   7 -27 146.847 99.3589   4
   0   7  27 79.0500 56.6284   2
   0  -7 -27 143.047 81.6548   4
   0  -7  27 134.769 72.0172   2
   0   7  28 597.842 105.586   2
   0  -7 -28 732.209 147.613   4
   0  -7  28 641.659 141.425   2
   0   7 -28 832.938 161.922   4
   0  -7  29 822.228 157.205   2
   0   7  29 547.025 104.140   2
   0   7 -29 747.709 151.905   4
   0  -7 -29 601.262 134.933   4
   0  -7 -30 326.962 111.083   4
   0   7 -30 535.470 156.201   4
   0   7  30 324.740 87.4554   2
   0  -7  30 312.196 108.845   2
   0   7 -31 1372.55 201.107   4
   0  -7 -31 1515.05 196.371   4
   0   7  31 1133.19 151.408   2
   0  -7  31 1388.47 200.581   2
   0  -7  32-29.9843 78.3655   2
   0  -7 -32 95.7224 89.7883   4
   0   7 -32 50.6372 81.7678   4
   0   7  32-14.3740 66.8181   2
   0  -7 -33 49.5238 90.7108   4
   0  -7 -33-21.6672 94.3701   5
   0   7 -33 120.861 96.2994   4
   0  -7  33-32.8970 84.7110   2
   0   7 -34-20.8972 92.0070   4
   0  -7 -34 120.132 68.7352   4
   0  -7 -34 60.8792 76.2130   5
   0  -7  34 4.29487 78.4757   2
   0  -7  35 311.244 111.195   2
   0   7 -35 252.313 113.886   4
   0  -7 -35 402.495 120.585   4
   0  -7 -35 181.576 100.357   5
   0  -7  36 17.2543 81.8278   2
   0  -7 -36 2.95800 77.1299   4
   0   7 -36 129.293 118.903   4
   0  -7 -36-9.55220 73.2356   5
   0   7 -37 279.996 125.510   4
   0  -7 -37 109.388 87.0164   4
   0  -7 -37 171.058 98.8825   5
   0  -7  37 141.956 104.620   2
   0  -7  38-21.0748 74.5563   2
   0  -7 -38-70.3916 101.599   4
   0  -7  39 245.661 121.801   2
   0   8   0 32237.2 329.838   2
   0   8   0 30832.4 413.138   1
   0  -8   0 34544.1 443.392   6
   0  -8   0 32081.9 333.003   2
   0   8   0 31850.3 228.169   5
   0   8   0 31267.2 424.741   6
   0   8   1 1636.11 102.862   6
   0  -8  -1 1981.51 107.412   1
   0   8  -1 1813.67 88.3469   2
   0   8   1 1836.45 106.942   1
   0  -8  -1 1730.62 71.5782   2
   0  -8   1 1880.21 105.124   6
   0   8  -1 1774.94 103.629   6
   0  -8  -1 1812.63 107.219   6
   0   8   1 1710.80 70.2528   2
   0   8  -1 1730.94 97.3654   1
   0  -8   1 1902.46 93.8353   2
   0  -8  -2 136.002 38.8948   1
   0  -8  -2 119.157 33.8642   6
   0   8   2 167.965 55.6922   6
   0   8   2 263.253 30.2306   2
   0   8  -2 97.9149 35.8501   6
   0  -8   2 250.791 51.3553   2
   0  -8  -2 278.926 32.6558   2
   0   8   2 283.964 65.4491   1
   0  -8   2 139.825 39.3466   6
   0   8  -2 191.623 43.1810   2
   0   8   3 1765.07 109.475   1
   0  -8  -3 1790.07 56.9676   5
   0  -8   3 1922.46 105.524   2
   0  -8   3 2195.74 110.803   6
   0   8   3 1904.02 115.041   6
   0   8  -3 1959.90 104.429   2
   0  -8  -3 1869.68 111.802   1
   0   8  -3 1986.70 108.116   6
   0   8   3 1862.91 57.8691   5
   0  -8  -3 2071.21 118.819   6
   0   8  -4 2850.14 131.632   2
   0  -8   4 2833.43 138.759   4
   0   8   4 2652.36 138.397   6
   0  -8   4 2750.94 131.229   2
   0  -8  -4 2933.87 140.499   1
   0   8   4 2616.11 134.982   1
   0  -8  -4 2836.63 142.416   6
   0   8  -4 2666.48 129.156   6
   0  -8  -4 2700.50 80.4610   5
   0  -8  -5 364.354 52.4661   1
   0  -8  -5 356.110 35.7868   5
   0   8  -5 374.067 54.0110   6
   0  -8   5 395.118 56.5100   4
   0  -8   5 357.462 62.0312   2
   0   8  -5 405.012 61.1029   2
   0  -8  -5 325.433 35.7413   3
   0  -8  -5 336.067 50.9679   6
   0  -8   6 2282.58 133.894   2
   0  -8   6 2282.92 133.938   4
   0  -8  -6 2407.63 95.8440   5
   0  -8  -6 2554.19 142.172   6
   0  -8  -6 2552.25 91.6204   3
   0  -8  -6 2408.19 134.235   1
   0   8  -6 2448.27 135.469   2
   0   8  -6 2410.68 126.234   6
   0  -8  -7 2211.32 135.866   6
   0   8  -7 2043.30 131.243   2
   0  -8  -7 2020.83 119.531   4
   0  -8   7 1764.74 125.030   2
   0  -8   7 2144.08 134.571   4
   0  -8  -7 2110.46 130.949   1
   0  -8  -7 2019.76 96.1398   5
   0   8  -7 1724.13 128.443   4
   0  -8  -7 2023.55 77.9451   3
   0  -8  -8 3427.06 170.081   1
   0  -8  -8 3316.21 96.0317   3
   0  -8   8 3500.87 178.071   4
   0   8  -8 3318.01 170.755   2
   0  -8  -8 3126.31 152.062   4
   0   8  -8 3139.99 166.526   4
   0  -8  -8 3601.67 181.345   6
   0  -8   8 3263.68 172.257   2
   0  -8  -9 688.503 39.3835   2
   0  -8  -9 740.151 83.6625   1
   0  -8   9 974.630 109.197   2
   0   8   9 729.591 40.0559   2
   0   8  -9 859.078 94.6952   2
   0  -8  -9 782.365 90.5208   6
   0  -8  -9 649.394 41.1575   3
   0   8  -9 529.437 73.8946   4
   0  -8   9 812.862 89.2635   4
   0  -8  -9 700.247 80.4396   4
   0   8  10 6397.27 131.111   2
   0   8 -10 6920.13 263.317   2
   0   8 -10 6249.70 248.244   4
   0  -8  10 6524.23 258.726   2
   0  -8 -10 6497.13 233.552   4
   0  -8  10 6917.02 259.108   4
   0  -8 -10 6527.59 133.219   2
   0  -8 -10 6994.44 250.309   1
   0  -8 -10 5786.52 118.629   3
   0   8 -11 1458.12 139.822   4
   0  -8  11 1568.86 131.452   4
   0  -8 -11 1665.76 127.705   4
   0  -8  11 1831.73 152.102   2
   0   8  11 1766.28 78.4748   2
   0  -8 -11 1678.06 76.2648   2
   0   8  12 13809.0 234.969   2
   0  -8  12 13292.8 392.957   2
   0  -8 -12 13893.4 363.299   4
   0   8  12 15395.6 384.349   4
   0   8  12 13544.7 174.145   3
   0  -8 -12 14263.5 239.005   2
   0   8 -12 14307.2 392.128   4
   0   8  13 2907.17 80.2133   3
   0   8 -13 2778.74 183.699   4
   0   8  13 3072.51 120.712   2
   0  -8  13 3368.58 206.284   2
   0  -8 -13 3101.01 121.138   2
   0  -8 -13 2771.41 169.930   4
   0   8  13 3130.17 180.593   4
   0   8  14 654.577 39.1287   3
   0   8 -14 1031.36 127.243   4
   0  -8 -14 602.260 80.6411   4
   0  -8  14 833.664 109.209   2
   0  -8 -14 782.071 66.2384   2
   0   8  14 800.760 68.4647   2
   0   8  14 854.741 99.0520   4
   0  -8 -15 32.8025 52.5711   4
   0   8  15 234.905 24.8952   3
   0  -8  15 246.941 71.4298   2
   0  -8 -15 216.415 38.6822   2
   0   8  15 231.632 41.7080   2
   0   8 -15 253.928 82.5888   4
   0   8  16 230.360 45.4721   2
   0   8 -16 140.315 66.0345   4
   0  -8 -16 79.7714 40.4258   4
   0  -8  16 210.322 69.4319   2
   0   8  16 152.796 20.3364   3
   0  -8 -16 156.652 35.8537   2
   0   8  17 9.41200 25.4056   2
   0  -8 -17-20.8948 30.3230   2
   0   8  17-5.21158 9.53221   3
   0  -8  17 16.7357 49.1227   2
   0  -8 -17-78.2019 59.8277   4
   0   8 -17 47.4941 56.0509   4
   0   8  18 11.5698 30.6807   2
   0  -8  18 59.8709 53.7933   2
   0   8 -18 71.4564 56.6678   4
   0  -8 -18-4.27495 26.2839   2
   0   8  18 21.3075 12.0393   3
   0  -8 -18-45.2039 53.4598   4
   0  -8 -19 14.3820 30.0526   2
   0   8  19 32.4110 11.7809   3
   0   8 -19 3.70140 55.9942   4
   0   8  19-23.1491 32.5084   2
   0  -8 -19 11.8953 52.1344   4
   0  -8  19-22.2941 53.6818   2
   0   8  20 941.792 97.1921   2
   0   8 -20 940.821 141.606   4
   0  -8 -20 1028.65 137.665   4
   0  -8  20 790.145 122.595   2
   0  -8 -20 1001.31 96.5279   2
   0   8  20 792.131 46.8119   3
   0  -8  21 16.1415 54.1073   2
   0   8 -21 71.7089 66.4295   4
   0   8  21-0.92653 31.6368   2
   0  -8 -21 107.437 61.0438   4
   0  -8 -21 66.5850 40.9467   2
   0   8  21 45.9428 14.4250   3
   0   8  22 54.9499 43.0323   2
   0  -8 -22 63.8681 65.0607   4
   0   8 -22 41.7008 70.8570   4
   0   8  22 23.9707 11.5625   3
   0  -8  22-34.4910 63.0730   2
   0   8 -23 731.889 145.315   4
   0  -8  23 583.194 115.541   2
   0  -8 -23 927.639 139.229   4
   0   8  23 617.959 84.9133   2
   0   8  23 500.405 38.3321   3
   0   8  24 950.582 52.1579   3
   0  -8  24 1400.06 178.954   2
   0   8 -24 1291.94 189.442   4
   0   8  24 1229.12 127.075   2
   0  -8 -24 1448.92 165.652   4
   0   8 -25 124.447 94.2910   4
   0  -8  25 177.759 92.5982   2
   0   8  25-14.7555 37.3760   2
   0  -8 -25 239.280 92.3576   4
   0   8 -26 142.761 87.7198   4
   0  -8  26 43.6859 76.1412   2
   0   8  26 138.436 55.1052   2
   0  -8 -26 169.647 78.2954   4
   0  -8  27 831.427 146.609   2
   0   8  27 862.991 117.409   2
   0   8 -27 1097.96 170.892   4
   0  -8 -27 1048.13 160.320   4
   0  -8 -28 2187.95 219.333   4
   0  -8  28 1778.16 216.227   2
   0   8  28 1842.92 172.600   2
   0   8 -28 1977.83 234.527   4
   0   8 -29 402.402 141.819   4
   0  -8  29 619.762 142.185   2
   0  -8 -29 638.846 131.561   4
   0   8  29 581.182 105.694   2
   0  -8 -30 1840.44 215.837   4
   0  -8  30 1603.27 211.613   2
   0   8  30 1542.29 170.649   2
   0   8 -30 1664.40 210.600   4
   0   8 -31 712.410 173.302   4
   0   8  31 688.900 122.254   2
   0  -8  31 865.929 169.861   2
   0  -8 -31 734.829 148.144   4
   0  -8 -32 170.221 94.6443   4
   0   8 -32 190.848 108.420   4
   0  -8 -32-57.8546 94.6651   5
   0  -8  32-0.23018 73.3400   2
   0  -8 -33 904.191 162.776   4
   0  -8  33 527.058 135.834   2
   0  -8 -33 516.302 138.416   5
   0   8 -33 684.356 149.836   4
   0  -8  34-18.8140 75.3324   2
   0   8 -34 197.137 114.463   4
   0  -8 -34 30.2706 72.8620   5
   0  -8 -34 101.885 85.4252   4
   0   8 -35 108.918 100.476   4
   0  -8  35 86.5215 73.6420   2
   0  -8 -35-140.708 103.956   5
   0  -8 -35 118.569 100.737   4
   0  -8  36 116.766 89.6061   2
   0   8 -36 53.4197 78.4329   4
   0  -8 -36 326.010 127.380   5
   0  -8 -36 326.871 112.338   4
   0  -8  37 142.063 97.8069   2
   0  -8 -37 156.258 102.018   4
   0   8 -37 291.363 148.936   4
   0  -8 -37 324.143 132.183   5
   0   8 -38 148.734 104.978   4
   0  -8  38 96.8170 107.355   2
   0  -8  39 17.8978 80.5907   2
   0   9   0 72.4265 35.3979   2
   0   9   0 320.246 85.9078   1
   0   9   0 75.8815 24.8023   5
   0  -9   0 75.4893 39.3513   6
   0  -9   0 196.395 44.0572   2
   0   9   0 263.218 63.8739   6
   0  -9   1 1202.76 80.3012   2
   0  -9  -1 1133.81 87.5797   1
   0  -9  -1 1003.96 59.3375   2
   0   9  -1 1036.13 83.7858   1
   0   9   1 1028.83 86.5403   1
   0  -9   1 1156.15 87.2515   6
   0   9   1 1092.41 89.6756   6
   0  -9  -1 991.248 83.7278   6
   0   9   1 1036.16 58.9692   2
   0   9  -1 938.631 84.6183   6
   0   9  -1 1119.17 75.0858   2
   0   9   2 14385.1 312.019   1
   0   9  -2 14767.0 304.122   6
   0  -9  -2 14973.8 325.672   6
   0   9   2 15322.6 195.190   2
   0  -9   2 14515.4 274.978   2
   0  -9  -2 15558.9 320.943   1
   0   9   2 13960.0 311.194   6
   0  -9   2 15229.8 307.722   6
   0   9  -2 15201.8 278.645   2
   0  -9  -2 14512.4 193.800   2
   0   9   3 511.169 31.5916   5
   0   9   3 574.887 34.7462   2
   0  -9  -3 498.319 30.4302   5
   0  -9  -3 544.879 68.5527   6
   0  -9   3 512.889 63.0444   6
   0  -9  -3 557.815 33.7416   2
   0   9  -3 608.293 66.5432   6
   0   9  -3 598.901 62.8796   2
   0  -9  -3 557.444 66.6338   1
   0  -9   3 621.852 68.5094   2
   0   9   3 565.017 70.8358   1
   0   9   3 629.819 74.3619   6
   0   9   4 12.4391 33.4505   1
   0   9   4 42.1142 36.5086   6
   0  -9  -4 61.1606 33.5642   1
   0   9  -4 66.1409 37.9081   2
   0   9  -4 49.2180 29.1574   6
   0  -9   4-13.5437 28.9497   6
   0  -9  -4 32.0690 22.1482   6
   0  -9   4-23.9043 39.5467   4
   0  -9   4 56.4035 36.6033   2
   0  -9  -4 38.4722 15.1961   5
   0  -9   5 102.360 41.2361   2
   0  -9  -5 86.2690 19.7803   5
   0  -9  -5 74.9671 20.0321   3
   0   9  -5 76.9924 34.1391   2
   0   9   5 49.3163 35.4305   1
   0  -9   5-28.9860 40.8140   4
   0   9   5 98.3448 44.0688   6
   0  -9  -5 80.2752 27.3640   1
   0   9  -5 106.105 35.9339   6
   0  -9  -5 53.0049 29.3417   6
   0  -9  -6 1782.29 120.873   1
   0  -9  -6 1667.93 120.870   6
   0  -9   6 1497.84 115.383   4
   0  -9  -6 1548.62 78.0447   3
   0   9  -6 1612.96 108.314   6
   0   9  -6 1577.19 112.563   2
   0  -9   6 1686.30 118.953   2
   0  -9  -6 1454.97 73.9205   5
   0  -9   7 1695.47 124.425   4
   0  -9  -7 1746.44 87.9374   5
   0   9  -7 1995.95 130.916   2
   0   9  -7 1787.50 116.008   6
   0  -9  -7 1887.30 131.695   6
   0  -9   7 1680.59 123.880   2
   0  -9  -7 1732.76 126.019   1
   0  -9  -7 1778.31 80.0404   3
   0  -9   8 1851.87 131.310   4
   0  -9  -8 1575.58 91.7243   5
   0   9  -8 1764.63 129.506   2
   0  -9  -8 1501.73 111.396   4
   0   9  -8 1504.23 123.273   4
   0  -9   8 1770.59 130.563   2
   0  -9  -8 1692.85 125.615   1
   0  -9  -8 1875.57 134.706   6
   0  -9  -8 1730.60 75.6641   3
   0  -9   9 2842.09 175.846   4
   0  -9  -9 2621.82 126.929   5
   0  -9   9 2447.24 161.221   2
   0  -9  -9 2391.65 141.747   4
   0  -9  -9 2590.22 163.619   6
   0   9  -9 2593.78 161.672   2
   0  -9  -9 2549.92 158.913   1
   0   9  -9 2403.06 156.579   4
   0  -9  -9 2454.48 87.7341   3
   0  -9 -10 23.0308 32.3682   1
   0  -9 -10-37.3227 42.8061   6
   0  -9 -10-14.1014 17.0564   3
   0   9  10 6.74553 11.2745   2
   0  -9  10 9.00297 32.3076   4
   0  -9 -10 3.99195 30.6434   4
   0  -9 -10 8.18413 10.5344   2
   0  -9 -11 2356.04 151.551   4
   0  -9 -11 2339.84 81.4368   2
   0  -9 -11 2447.39 160.649   1
   0   9 -11 2082.93 162.654   4
   0   9  11 2414.75 82.7417   2
   0  -9  11 2551.01 174.534   2
   0  -9 -11 2203.39 76.9257   3
   0   9  12 97.9709 26.4585   2
   0  -9  12 361.784 98.4943   2
   0  -9 -12 102.441 25.5285   2
   0  -9 -12 127.865 61.6414   4
   0  -9 -13 2532.93 102.657   2
   0   9 -13 2811.75 194.035   4
   0  -9  13 2609.45 188.319   2
   0   9  13 2441.14 101.728   2
   0  -9 -13 2544.14 163.624   4
   0  -9  14 290.819 86.8139   2
   0   9  14 97.7534 30.3767   2
   0  -9 -14 167.821 34.2264   2
   0   9 -14 305.652 86.2347   4
   0  -9 -14 146.839 63.1169   4
   0  -9  15 283.169 77.9220   2
   0   9  15 221.048 37.7574   2
   0  -9 -15 286.193 44.4168   2
   0   9 -15 355.497 77.3953   4
   0  -9 -15 198.855 53.7549   4
   0  -9 -16 48.3848 22.4955   2
   0  -9 -16-3.93980 42.6495   4
   0   9  16 38.5750 26.3735   2
   0  -9  16 17.3543 43.6543   2
   0   9  16 19.6399 10.6660   3
   0   9 -16 63.4546 63.7840   4
   0  -9 -17 916.513 110.437   4
   0   9  17 1038.02 86.6839   2
   0   9 -17 1571.69 175.563   4
   0  -9 -17 1084.28 87.5268   2
   0  -9  17 917.380 126.617   2
   0   9  17 858.683 42.5265   3
   0   9  18 72.8063 30.3422   2
   0   9 -18 147.865 72.5921   4
   0   9  18 89.1451 15.4434   3
   0  -9 -18 55.2091 43.7345   4
   0  -9 -18 100.657 29.4974   2
   0  -9  18 241.266 73.0859   2
   0  -9  19 300.777 82.1777   2
   0  -9 -19 139.632 45.8823   4
   0  -9 -19 309.975 50.8101   2
   0   9  19 276.901 52.2566   2
   0   9 -19 339.586 92.1537   4
   0  -9 -20 111.307 39.3384   2
   0   9  20 122.700 41.4155   2
   0  -9  20 125.651 73.6718   2
   0  -9 -20 65.4400 40.7430   4
   0   9 -20 70.8927 61.2929   4
   0  -9 -21 1829.94 132.607   2
   0  -9 -21 1613.82 167.818   4
   0   9  21 1601.36 126.943   2
   0   9 -21 1232.65 169.285   4
   0  -9  21 1532.63 177.288   2
   0  -9 -22 105.067 52.4993   2
   0   9 -22 127.651 101.439   4
   0  -9 -22 148.217 84.1116   4
   0   9  22 113.972 53.6714   2
   0  -9  22 78.0225 65.3359   2
   0   9 -23 1846.62 203.986   4
   0  -9 -23 2299.77 204.025   4
   0  -9  23 1790.82 196.731   2
   0   9  23 2019.46 151.577   2
   0   9 -24 852.156 160.229   4
   0   9  24 742.981 99.7073   2
   0  -9 -24 1082.75 151.083   4
   0  -9  24 1103.78 165.137   2
   0   9 -25 1435.85 193.337   4
   0  -9 -25 1958.92 198.211   4
   0   9  25 1632.10 147.004   2
   0  -9  25 1631.68 199.882   2
   0   9 -26 326.645 119.998   4
   0   9  26 274.974 76.9280   2
   0  -9  26 174.775 88.7630   2
   0  -9 -26 615.592 131.263   4
   0  -9 -27 21.6078 76.6931   4
   0   9 -27 52.0072 76.1201   4
   0  -9  27 69.7994 75.7357   2
   0   9  27 93.7382 60.3100   2
   0  -9 -28 478.014 115.190   4
   0   9 -28 431.041 114.615   4
   0  -9  28 326.941 120.191   2
   0   9  28 265.312 77.2080   2
   0  -9 -29 295.150 122.778   4
   0  -9  29 409.290 122.001   2
   0   9  29 287.756 76.5322   2
   0   9 -29 186.168 121.665   4
   0   9 -30 13.6151 98.1881   4
   0  -9  30 121.865 104.117   2
   0  -9 -30 26.3226 84.4330   4
   0  -9 -30-60.3440 78.4327   5
   0   9 -31 115.089 90.3440   4
   0  -9 -31-22.8365 86.4486   5
   0  -9  31 32.1800 77.2010   2
   0  -9 -31-28.8228 68.1396   4
   0  -9 -32 162.626 120.220   4
   0  -9  32-12.3277 67.9122   2
   0  -9 -32-56.5778 92.3466   5
   0   9 -32 283.462 133.943   4
   0   9 -33 157.813 98.7657   4
   0  -9  33-35.5740 72.2423   2
   0  -9 -33-0.99379 75.5652   4
   0  -9 -33-87.2216 108.511   5
   0  -9 -34 314.554 119.551   4
   0  -9 -34-123.880 96.0842   5
   0  -9  34 59.7502 84.0077   2
   0   9 -34 149.180 103.257   4
   0  -9  35-104.782 91.9970   2
   0  -9 -35-30.6731 74.6126   4
   0  -9 -35 25.9035 89.3917   5
   0   9 -35-75.8797 75.4556   4
   0   9 -36 32.3154 86.0293   4
   0  -9  36-77.1785 102.848   2
   0  -9 -36 32.6453 77.5722   5
   0  -9 -36-10.7713 91.9408   4
   0   9 -37 235.001 128.411   4
   0  -9  37 80.3225 97.5320   2
   0  -9 -37 150.184 94.9088   4
   0  -9 -37 100.261 94.5516   5
   0  -9  38 604.722 160.250   2
   0  -9 -38 753.060 191.580   5
   0   9 -38 652.146 167.198   4
   0 -10   0 254.024 49.4839   6
   0  10   0 229.645 51.2287   1
   0  10   0 153.283 46.2081   6
   0 -10   0 210.084 36.2668   2
   0  10   0 216.734 34.1465   2
   0  10   0 193.312 21.4638   5
   0 -10   1 75.5628 30.9676   2
   0 -10  -1 114.341 39.5201   6
   0  10  -1 104.117 29.7626   2
   0  10  -1 68.8001 36.2335   1
   0 -10   1 122.358 39.2325   6
   0 -10  -1 34.6743 26.7195   1
   0  10   1 101.257 25.7133   2
   0 -10  -1 126.473 30.3442   2
   0  10   1 147.267 50.0964   6
   0  10  -1 98.7595 41.2501   6
   0  10   1 81.2850 40.8440   1
   0 -10   2 72.0019 38.9972   6
   0  10   2 87.6309 54.4000   6
   0  10  -2 94.1700 42.0064   6
   0 -10  -2 66.9711 32.9546   6
   0  10  -2 115.455 40.5460   2
   0  10   2 238.623 68.3600   1
   0 -10  -2 174.622 33.0647   2
   0 -10   2 206.153 50.4903   2
   0 -10  -2 97.6647 37.1710   1
   0  10  -2 85.8801 38.5121   1
   0  10   2 137.506 29.4446   2
   0 -10  -3 0.96696 7.75256   5
   0  10   3 32.1181 36.3238   1
   0 -10  -3 31.1808 25.6970   1
   0 -10  -3 2.27133 12.2272   2
   0  10   3-2.00047 11.3545   5
   0  10  -3-24.2105 33.9307   6
   0 -10  -3 12.4015 28.1499   6
   0 -10   3 24.3344 24.5106   6
   0  10   3 19.5292 38.9228   6
   0  10  -3-8.81908 24.8369   2
   0 -10   3 42.8550 36.3411   2
   0  10   3 15.7325 14.8192   2
   0  10   4 334.126 62.1184   6
   0  10   4 353.402 63.5158   1
   0 -10  -4 304.093 56.4024   1
   0 -10   4 335.070 54.0523   6
   0 -10  -4 367.912 59.7519   6
   0  10  -4 386.875 54.7347   2
   0  10  -4 306.957 56.4290   6
   0 -10   4 342.216 57.9694   2
   0 -10  -4 270.541 25.4308   5
   0  10  -5 281.191 52.7781   2
   0  10   5 186.288 52.7712   6
   0 -10   5 190.910 47.2739   4
   0 -10  -5 288.260 33.4444   5
   0 -10  -5 256.129 54.4176   1
   0  10  -5 283.889 53.0318   6
   0 -10   5 262.971 55.1292   2
   0 -10  -5 279.648 55.0808   6
   0  10   5 190.766 52.1688   1
   0 -10   6 2541.52 150.797   4
   0 -10  -6 2359.38 92.3653   5
   0 -10  -6 2600.27 151.787   1
   0 -10  -6 2387.02 104.133   3
   0 -10  -6 2251.81 146.692   6
   0 -10   6 2242.86 138.507   2
   0  10  -6 2366.04 140.866   2
   0  10  -6 2177.39 130.364   6
   0 -10  -7 4.64601 27.4289   1
   0 -10  -7 47.8010 34.8714   6
   0  10  -7 63.5510 38.3596   6
   0 -10  -7 25.6457 17.7354   3
   0 -10   7 55.1109 40.3517   4
   0  10  -7 51.7308 37.6712   2
   0 -10   7 75.0239 42.4386   2
   0 -10  -7 27.5703 21.3694   5
   0 -10   8 895.023 98.5500   4
   0 -10  -8 620.442 74.5835   4
   0  10  -8 951.547 91.3331   6
   0 -10  -8 826.313 67.3275   5
   0 -10   8 908.861 99.2129   2
   0 -10  -8 753.935 55.1685   3
   0  10  -8 921.683 96.6595   2
   0 -10  -8 869.943 98.6825   6
   0 -10  -8 897.642 98.1218   1
   0 -10  -9 4666.74 164.248   5
   0  10  -9 4566.87 223.370   4
   0 -10  -9 5097.74 232.393   6
   0 -10  -9 5030.38 223.428   1
   0  10  -9 4878.78 222.973   2
   0 -10   9 5139.38 229.503   4
   0 -10  -9 4731.08 131.093   3
   0 -10  -9 4419.80 197.414   4
   0 -10   9 4745.00 224.634   2
   0 -10 -10 856.266 79.2906   5
   0 -10 -10 975.873 57.5272   3
   0 -10  10 1004.98 113.317   2
   0  10 -10 812.932 95.8280   4
   0 -10 -10 869.793 93.2036   4
   0 -10 -10 1008.08 105.903   1
   0  10  11 286.985 26.0541   2
   0 -10  11 348.578 78.5132   2
   0 -10 -11 232.206 27.0773   3
   0  10 -11 165.358 54.0312   4
   0 -10 -11 337.843 57.3294   5
   0 -10 -11 256.163 55.0283   4
   0  10 -12 8290.68 329.430   4
   0 -10  12 9340.77 339.226   2
   0 -10 -12 8592.53 154.687   2
   0  10  12 8635.90 158.029   2
   0 -10 -12 9163.87 309.365   4
   0 -10 -13 136.555 52.2817   4
   0 -10 -13 79.5070 20.4938   2
   0  10  13 114.524 25.9784   2
   0  10 -13 32.0504 45.1066   4
   0 -10  13 211.993 79.9360   2
   0 -10 -14 9654.67 198.452   2
   0 -10  14 9181.77 356.559   2
   0  10 -14 9024.76 360.915   4
   0  10  14 9602.41 200.771   2
   0 -10 -14 8964.74 320.093   4
   0 -10 -15 1665.84 142.508   4
   0  10 -15 1585.69 174.896   4
   0  10  15 1981.93 99.3540   2
   0 -10 -15 1958.02 97.0428   2
   0 -10  15 2033.68 180.145   2
   0 -10 -16 1337.39 87.3623   2
   0  10 -16 915.538 132.781   4
   0 -10 -16 987.296 117.357   4
   0  10  16 1184.13 82.6027   2
   0 -10  16 1160.57 142.710   2
   0 -10 -17 464.301 55.3433   2
   0  10 -17 496.549 95.8565   4
   0  10  17 400.573 55.3179   2
   0 -10  17 408.734 91.0290   2
   0 -10 -17 266.269 60.5607   4
   0 -10  18-9.58890 57.5980   2
   0 -10 -18 3.11554 23.0646   2
   0  10  18-10.3294 21.6708   2
   0 -10 -18-104.711 72.3436   4
   0  10 -18 27.6810 65.6255   4
   0 -10  19 1444.78 163.788   2
   0  10  19 1508.55 109.193   2
   0 -10 -19 1731.74 113.831   2
   0 -10 -19 1403.57 143.921   4
   0  10 -19 3016.53 289.677   4
   0  10  20 191.172 47.4352   2
   0 -10  20 182.053 76.9587   2
   0 -10 -20 53.8239 61.2718   4
   0 -10 -20 210.477 48.2899   2
   0  10 -21 5134.78 314.835   4
   0 -10 -21 5446.56 219.980   2
   0 -10 -21 4888.56 289.312   4
   0 -10  21 5067.17 315.807   2
   0  10  21 5415.54 219.342   2
   0  10 -22 1244.85 175.144   4
   0 -10 -22 1114.20 108.949   2
   0  10  22 1119.82 111.397   2
   0 -10 -22 1203.88 164.392   4
   0 -10  22 1229.05 175.851   2
   0  10 -23 1191.65 174.678   4
   0  10  23 1020.60 104.982   2
   0 -10  23 959.236 146.639   2
   0 -10 -23 1101.31 152.119   4
   0 -10 -24 1769.66 189.028   4
   0  10 -24 1438.38 192.609   4
   0 -10  24 1331.14 182.761   2
   0  10  24 1355.55 125.771   2
   0  10  25 1544.66 139.259   2
   0  10 -25 1444.24 196.447   4
   0 -10  25 1401.64 189.608   2
   0 -10 -25 1686.72 198.954   4
   0  10  26 4908.10 250.255   2
   0 -10  26 4486.11 330.928   2
   0  10 -26 4713.60 337.694   4
   0 -10 -26 4953.78 314.563   4
   0  10 -27 306.013 121.937   4
   0 -10 -27 340.092 106.157   4
   0 -10  27 94.5865 92.1355   2
   0  10  27 156.025 61.7901   2
   0 -10 -28 2277.90 224.634   4
   0 -10 -28 1829.54 210.167   5
   0  10  28 2101.47 175.032   2
   0  10 -28 1755.33 226.179   4
   0 -10  28 1839.19 221.089   2
   0 -10 -29 94.8082 78.2432   5
   0 -10  29 2.43341 71.1445   2
   0 -10 -29 18.0094 60.8588   4
   0 -10 -30 847.974 152.649   4
   0  10 -30 702.600 154.674   4
   0 -10  30 960.726 173.764   2
   0 -10 -30 546.565 126.633   5
   0  10 -31 958.916 188.700   4
   0 -10 -31 911.200 163.852   4
   0 -10  31 718.334 159.763   2
   0 -10 -31 678.227 143.766   5
   0 -10 -32 830.853 153.343   4
   0 -10 -32 813.763 158.114   5
   0  10 -32 819.507 171.398   4
   0 -10  32 782.119 169.755   2
   0 -10 -33 64.9755 71.2959   4
   0 -10 -33 64.2226 80.5652   5
   0 -10  33-44.9799 76.4339   2
   0  10 -33 69.2755 80.0456   4
   0 -10 -34 171.031 95.2054   5
   0  10 -34 438.193 139.957   4
   0 -10 -34 563.861 141.002   4
   0 -10  34 342.739 122.208   2
   0 -10 -35 189.066 98.8637   4
   0  10 -35 69.8993 98.2500   4
   0 -10  35 156.023 105.197   2
   0 -10 -35-172.929 120.587   5
   0  10 -36 180.301 122.958   4
   0 -10 -36 35.6351 79.8822   4
   0 -10 -36-44.4418 95.8862   5
   0 -10  36-108.575 107.592   2
   0 -10 -37 70.5626 75.2196   5
   0  10 -37 139.845 120.131   4
   0 -10  37-2.30558 89.0168   2
   0 -10 -38 35.7583 103.498   5
   0 -10  38-10.6221 90.4976   2
   0  11   0 23.5253 40.9553   1
   0  11   0 39.4092 27.9255   2
   0 -11   0 27.5195 35.7945   6
   0 -11   0 38.0320 28.8493   2
   0  11   0 19.6335 37.4521   6
   0  11   0 3.58427 11.9810   5
   0  11  -1 2462.40 117.107   2
   0  11   1 2384.39 141.998   6
   0  11   1 2542.96 101.680   2
   0  11   1 2300.12 65.6812   5
   0  11   1 2361.63 139.305   1
   0 -11   1 2408.91 118.111   2
   0  11  -1 2411.97 136.685   1
   0 -11   1 2557.90 147.156   6
   0  11  -1 2585.78 84.5725   5
   0  11  -1 2241.05 139.573   6
   0 -11  -1 2427.96 103.042   2
   0 -11  -1 2460.03 143.194   6
   0 -11  -2 232.965 32.6836   2
   0  11   2 197.080 55.1599   6
   0  11   2 211.741 51.7781   1
   0 -11  -2 273.656 59.7043   6
   0  11  -2 223.319 49.1141   6
   0 -11   2 255.716 47.5170   2
   0  11  -2 188.989 45.2551   1
   0  11   2 270.044 34.4421   2
   0 -11   2 275.131 52.1735   6
   0 -11  -2 260.150 56.6367   1
   0  11  -2 215.037 41.5842   2
   0 -11   3 232.071 50.9824   2
   0  11  -3 235.293 54.6584   6
   0  11   3 295.821 59.5800   6
   0  11   3 202.909 22.8771   5
   0  11   3 218.941 28.2617   2
   0  11  -3 173.395 41.4077   2
   0 -11  -3 205.044 19.7375   5
   0  11   3 267.107 59.7278   1
   0 -11  -3 204.643 44.0593   6
   0 -11  -3 263.437 54.8539   1
   0 -11   3 185.856 48.8155   6
   0 -11  -3 241.502 29.5385   2
   0 -11  -4 869.469 45.1211   5
   0 -11  -4 953.303 45.1346   2
   0  11   4 863.269 92.5258   1
   0  11  -4 921.702 83.5440   2
   0  11   4 893.712 43.7495   2
   0 -11  -4 1062.76 99.4725   1
   0  11  -4 995.783 93.1130   6
   0  11   4 899.428 97.0900   6
   0 -11  -4 1049.97 102.350   6
   0 -11   4 961.415 93.7634   6
   0 -11   4 1013.48 90.5391   2
   0 -11  -5 187.768 46.0560   6
   0 -11  -5 145.188 22.7171   5
   0  11   5 185.681 60.8008   6
   0 -11   5 156.165 46.8985   2
   0 -11   5 105.140 35.0208   4
   0 -11  -5 136.971 40.9746   1
   0  11  -5 197.401 52.5296   6
   0  11  -5 153.473 46.8998   2
   0  11   5 209.512 54.5946   1
   0 -11  -6-13.2866 27.4184   1
   0 -11   6 58.1278 43.4882   2
   0  11  -6 36.4004 30.2590   2
   0 -11  -6 5.11339 16.3050   5
   0  11   6 40.1578 48.5488   1
   0 -11   6 24.7449 34.4926   4
   0 -11  -6 14.9330 28.3569   6
   0  11   6 13.5905 46.8527   6
   0 -11  -6 7.43637 16.4483   3
   0  11  -6 12.1462 31.0209   6
   0 -11   7 732.164 90.1649   4
   0  11  -7 712.666 87.5556   2
   0  11  -7 668.134 81.2015   6
   0 -11  -7 709.978 84.8483   6
   0 -11  -7 662.488 54.2909   5
   0 -11  -7 759.802 60.8070   3
   0 -11   7 702.096 86.7242   2
   0 -11  -7 819.699 89.1462   1
   0 -11  -8 665.094 55.8575   3
   0 -11  -8 929.869 102.573   1
   0 -11   8 683.837 89.8782   4
   0  11  -8 742.721 91.8288   2
   0  11  -8 617.859 75.7936   6
   0 -11  -8 657.563 59.3373   5
   0 -11  -8 775.684 95.3517   6
   0 -11   8 736.456 91.3931   2
   0  11  -9 243.107 59.6852   6
   0 -11  -9 206.643 45.8717   4
   0 -11  -9 266.103 42.3676   5
   0 -11  -9 248.786 31.6029   3
   0 -11   9 244.890 65.4744   2
   0 -11 -10 1062.34 83.9328   5
   0  11 -10 825.976 108.833   4
   0 -11 -10 977.852 62.9270   3
   0 -11 -10 960.642 99.2376   4
   0 -11  10 1026.45 117.935   2
   0 -11 -11 75.7191 34.9885   5
   0 -11 -11-17.9849 42.4175   4
   0 -11  11 75.3568 49.4063   2
   0 -11 -11 34.0900 12.3127   3
   0  11 -11-48.2275 55.6174   4
   0 -11 -12 425.370 38.1093   3
   0 -11 -12 432.886 65.4586   5
   0 -11 -12 427.030 71.2912   4
   0 -11  12 482.543 93.0860   2
   0  11 -12 267.716 58.7459   4
   0  11  12 358.143 29.0842   2
   0  11 -13-21.2517 52.7931   4
   0 -11  13 100.512 60.7103   2
   0 -11 -13 138.419 50.4051   4
   0  11  13 63.6562 17.9811   2
   0 -11 -13 55.4448 33.9839   5
   0 -11 -14 1547.94 73.2073   2
   0  11 -14 1337.89 145.679   4
   0  11  14 1515.43 73.5631   2
   0 -11 -14 1659.58 128.235   5
   0 -11  14 1584.36 158.200   2
   0 -11 -14 1686.81 148.007   4
   0 -11 -15 57.0992 47.3932   4
   0 -11  15 214.060 83.5991   2
   0 -11 -15 109.242 27.9520   2
   0  11  15 58.8167 25.0464   2
   0  11 -15 69.3570 58.2905   4
   0  11  16 4308.71 144.906   2
   0 -11  16 4032.10 259.345   2
   0  11 -16 4136.60 251.274   4
   0 -11 -16 4141.62 140.491   2
   0 -11 -16 4197.18 236.206   4
   0  11  17 137.105 33.1030   2
   0 -11 -17 181.199 37.4065   2
   0 -11 -17 123.391 47.8098   4
   0  11 -17 193.333 83.4460   4
   0 -11  17 191.267 65.8822   2
   0 -11 -18 15.3085 19.8334   2
   0  11 -18 68.9679 58.8113   4
   0  11  18 46.6845 27.0315   2
   0 -11 -18 65.9100 40.0590   4
   0 -11  18-37.4351 52.1758   2
   0  11 -19 147.028 87.5704   4
   0 -11 -19-38.7947 63.0093   4
   0 -11 -19 18.8497 28.6144   2
   0  11  19 51.5182 32.7085   2
   0 -11  19 139.528 72.2699   2
   0 -11 -20 313.583 100.811   4
   0 -11 -20 217.024 43.9393   2
   0  11 -20 320.188 105.078   4
   0 -11  20 186.080 72.2370   2
   0  11  20 206.929 46.4408   2
   0 -11 -21-22.4803 52.9641   4
   0 -11 -21 159.741 44.7531   2
   0 -11  21 442.500 117.325   2
   0  11  21 124.778 46.9187   2
   0  11 -21 255.513 118.195   4
   0  11 -22 1029.22 170.772   4
   0  11  22 1126.51 104.538   2
   0 -11  22 1089.25 160.683   2
   0 -11 -22 1108.78 160.162   4
   0 -11  23 1159.83 165.588   2
   0  11 -23 1113.17 169.142   4
   0  11  23 1181.67 113.022   2
   0 -11 -23 1196.21 164.133   4
   0  11  24 3392.51 189.513   2
   0 -11 -24 3399.40 259.105   4
   0  11 -24 3124.94 267.119   4
   0 -11  24 3531.25 284.529   2
   0 -11 -25 2754.93 240.317   5
   0 -11 -25 2814.10 236.442   4
   0  11 -25 2677.03 255.568   4
   0 -11  25 2507.62 246.986   2
   0  11  25 2694.58 177.904   2
   0  11  26 712.746 100.315   2
   0  11 -26 963.413 181.947   4
   0 -11  26 615.153 146.107   2
   0 -11 -26 881.970 156.687   5
   0 -11 -26 979.612 167.793   4
   0  11  27 1563.01 143.104   2
   0 -11  27 1643.01 214.536   2
   0 -11 -27 1954.04 209.185   4
   0 -11 -27 1575.00 194.274   5
   0  11 -27 1637.92 212.187   4
   0 -11  28 155.861 90.4488   2
   0 -11 -28 228.805 108.123   4
   0 -11 -28-12.5190 57.0017   5
   0  11 -28 126.242 124.263   4
   0 -11 -29 559.169 129.710   4
   0 -11 -29 389.306 118.218   5
   0 -11  29 439.958 125.307   2
   0  11 -29 384.115 143.585   4
   0 -11  30 964.168 176.980   2
   0  11 -30 819.724 166.607   4
   0 -11 -30 899.262 158.507   4
   0 -11 -30 901.010 164.667   5
   0 -11 -31 524.729 132.806   5
   0 -11 -31 683.823 149.251   4
   0 -11  31 454.874 137.743   2
   0  11 -31 831.869 178.702   4
   0 -11 -32 308.882 110.448   4
   0 -11 -32 160.432 87.8594   5
   0  11 -32 347.879 120.311   4
   0 -11  32 202.272 115.513   2
   0 -11 -33 38.5959 63.9366   4
   0 -11  33-26.2845 91.8799   2
   0 -11 -33 60.7914 76.4938   5
   0  11 -33 228.475 113.532   4
   0 -11  34 48.1985 76.2965   2
   0 -11 -34 17.2891 83.9163   4
   0  11 -34-50.1634 78.1720   4
   0 -11 -34-209.705 115.931   5
   0 -11 -35-122.212 107.589   5
   0 -11 -35 124.175 83.3700   4
   0  11 -35-192.485 125.096   4
   0 -11  35-45.6063 78.3915   2
   0  11 -36-45.6301 83.6480   4
   0 -11 -36-25.2769 92.6046   5
   0 -11  36-94.3113 83.2761   2
   0 -11 -36 197.783 110.914   4
   0 -11  37-33.2577 95.5989   2
   0  11 -37-78.0535 115.508   4
   0 -11 -37 29.5472 79.7437   5
   0 -11 -38-15.0866 93.5669   5
   0  12   0 3919.02 183.801   1
   0  12   0 3981.89 98.2580   5
   0  12   0 3879.04 187.116   6
   0 -12   0 4109.36 148.317   2
   0  12   0 4490.85 151.888   2
   0 -12   0 4046.26 190.630   6
   0  12  -1 2064.80 140.429   6
   0  12   1 1956.26 135.406   1
   0 -12   1 2296.55 143.935   6
   0 -12  -1 1981.72 98.0938   2
   0  12   1 2068.67 141.813   6
   0 -12  -1 2354.82 147.323   6
   0  12  -1 2170.01 79.7645   5
   0  12  -1 1997.22 133.168   1
   0 -12   1 2122.57 114.923   2
   0  12   1 2118.17 97.8054   2
   0  12   1 2032.37 64.1389   5
   0  12  -1 2318.45 117.695   2
   0  12  -2 19.7936 39.1732   1
   0 -12   2 119.882 47.1929   6
   0  12   2 54.0176 42.1342   1
   0  12  -2 70.7707 36.0525   2
   0  12  -2 47.0488 39.4854   6
   0 -12  -2 55.9478 37.3034   1
   0  12   2 47.3913 43.3195   6
   0 -12   2 136.144 45.0797   2
   0 -12  -2 59.6471 43.5371   6
   0  12   2 60.9424 25.8225   2
   0  12   2 48.1346 15.0524   5
   0 -12  -2 64.1889 26.4209   2
   0 -12   3 4327.43 193.911   6
   0 -12  -3 4308.75 200.113   1
   0  12   3 4368.27 204.276   6
   0  12  -3 4437.42 178.316   2
   0  12   3 4165.57 195.931   1
   0 -12  -3 3763.94 83.0779   5
   0  12   3 4469.08 117.018   2
   0 -12   3 4248.56 177.955   2
   0 -12  -3 4480.40 209.032   6
   0  12  -3 4104.23 189.051   6
   0 -12  -3 4290.50 116.390   2
   0  12   3 3783.10 86.7281   5
   0 -12   4 342.782 63.1964   6
   0  12  -4 300.231 58.1415   2
   0 -12  -4 244.568 24.9471   5
   0 -12  -4 298.264 29.8854   2
   0  12  -4 257.487 58.4790   6
   0 -12  -4 337.067 63.8514   1
   0  12   4 354.191 74.3720   6
   0 -12  -4 383.355 71.2829   6
   0  12   4 317.411 31.2865   2
   0  12   4 264.407 65.3517   1
   0 -12   4 394.493 65.9630   2
   0 -12   5 2512.37 158.865   4
   0  12  -5 2415.75 148.422   6
   0 -12  -5 2489.21 160.763   6
   0  12   5 2189.45 150.101   1
   0 -12  -5 2501.96 157.921   1
   0 -12  -5 2160.48 77.3981   5
   0  12  -5 2307.66 140.561   2
   0  12   5 2392.95 162.792   6
   0 -12   5 2463.77 148.430   2
   0 -12  -6 3763.43 114.126   5
   0  12   6 3721.02 193.330   1
   0  12  -6 3391.09 179.084   6
   0 -12   6 3895.28 191.993   2
   0 -12  -6 3921.57 202.312   1
   0  12   6 3337.97 192.208   6
   0 -12  -6 3852.13 150.945   3
   0 -12  -6 4261.30 211.546   6
   0  12  -6 3785.76 187.350   2
   0 -12   6 3885.83 197.397   4
   0 -12  -7 232.091 37.9972   3
   0 -12  -7 401.507 73.1399   1
   0 -12  -7 305.539 38.7307   5
   0 -12   7 279.285 63.9113   2
   0 -12   7 173.056 46.5695   4
   0  12  -7 197.699 51.5737   6
   0  12  -7 267.478 58.1784   2
   0 -12  -8 128.666 28.7916   5
   0  12  -8 136.983 44.7725   6
   0 -12   8 216.123 64.3088   2
   0 -12  -8 108.497 28.1924   3
   0 -12   9 41.1486 51.9754   2
   0 -12  -9-15.7026 19.0486   3
   0 -12  -9-47.5222 50.0257   4
   0  12  -9 35.9154 41.3902   6
   0 -12  -9 28.8938 23.9672   5
   0 -12 -10 1618.81 129.266   4
   0  12 -10 1818.76 135.805   6
   0 -12 -10 1621.00 103.078   5
   0 -12  10 2073.43 161.613   2
   0 -12 -10 1785.16 89.6198   3
   0 -12  11 134.873 57.2781   2
   0 -12 -11 135.938 26.0806   3
   0 -12 -11 40.5051 42.3661   4
   0 -12 -11 130.204 40.1821   5
   0 -12 -12 9.24189 18.2180   3
   0 -12 -12 1.20310 39.1135   4
   0 -12  12 43.3574 53.4174   2
   0  12 -12-35.5998 54.8444   4
   0 -12 -12 20.9909 34.0818   5
   0 -12 -13 424.844 64.9602   5
   0  12 -13 333.048 73.1205   4
   0 -12 -13 356.885 71.8252   4
   0 -12 -13 305.105 32.4716   3
   0 -12  13 467.136 91.3226   2
   0 -12  14 837.930 118.872   2
   0 -12 -14 756.272 99.0707   4
   0 -12 -14 790.695 90.8656   5
   0  12  14 676.754 44.2472   2
   0  12 -14 625.469 105.813   4
   0  12  15 1100.47 63.0665   2
   0 -12 -15 1081.29 120.609   4
   0 -12 -15 1079.87 111.140   5
   0  12 -15 956.005 124.930   4
   0 -12  15 1282.14 151.036   2
   0 -12 -16 4408.36 225.089   5
   0  12  16 4466.76 137.659   2
   0 -12  16 4464.83 273.242   2
   0 -12 -16 4358.54 244.935   4
   0  12 -16 4255.59 266.843   4
   0 -12  17 1220.83 158.881   2
   0 -12 -17 1357.81 134.649   5
   0  12 -17 1172.79 149.201   4
   0 -12 -17 1245.87 77.2642   2
   0  12  17 1321.16 82.4460   2
   0 -12 -17 1255.47 141.168   4
   0  12 -18 2517.27 217.310   4
   0 -12 -18 2635.79 186.507   5
   0  12  18 2706.36 123.752   2
   0 -12  18 2662.83 222.114   2
   0 -12 -18 2935.53 123.744   2
   0 -12 -18 2438.91 190.250   4
   0 -12 -19 2254.20 181.278   5
   0 -12 -19 1935.53 177.104   4
   0 -12  19 2261.65 209.883   2
   0  12 -19 2082.85 206.681   4
   0  12  19 2327.46 121.433   2
   0 -12 -19 2433.34 120.875   2
   0 -12 -20 281.546 72.7575   5
   0 -12  20 190.325 81.2058   2
   0 -12 -20 45.5632 62.2801   4
   0  12 -20 127.190 77.7043   4
   0 -12 -20 212.832 43.2160   2
   0  12  20 190.881 41.4246   2
   0 -12 -21 2488.16 208.709   4
   0 -12 -21 2504.73 205.795   5
   0  12 -21 2527.71 234.756   4
   0 -12  21 2975.90 252.934   2
   0  12  21 2660.05 142.981   2
   0 -12  22 429.427 110.408   2
   0 -12 -22 479.640 100.961   5
   0  12  22 378.490 59.6031   2
   0 -12 -22 420.787 100.625   4
   0  12 -22 423.469 114.101   4
   0 -12 -23 705.517 120.999   5
   0  12 -23 680.405 139.255   4
   0 -12 -23 640.646 128.897   4
   0 -12  23 810.030 147.008   2
   0  12  23 702.017 83.5922   2
   0 -12 -24 151.137 93.6303   4
   0 -12 -24 119.475 72.8241   5
   0 -12  24 216.752 98.4577   2
   0  12 -24 126.789 93.3830   4
   0  12  24 180.559 48.8735   2
   0  12 -25 1333.79 193.825   4
   0 -12 -25 1484.19 183.495   5
   0  12  25 1353.14 121.586   2
   0 -12  25 1408.25 192.515   2
   0 -12 -25 1887.85 205.530   4
   0 -12  26 612.834 145.165   2
   0  12  26 482.822 80.7938   2
   0  12 -26 578.227 139.128   4
   0 -12 -26 427.442 108.560   5
   0 -12 -26 601.322 127.153   4
   0  12 -27 1704.59 215.682   4
   0 -12 -27 1418.04 183.553   5
   0 -12  27 1624.96 222.250   2
   0 -12 -27 2232.18 232.529   4
   0 -12  28 1403.25 207.539   2
   0  12 -28 1360.68 202.524   4
   0 -12 -28 1506.00 192.096   4
   0 -12 -28 1346.19 194.286   5
   0 -12  29 656.264 154.994   2
   0 -12 -29 387.193 116.702   5
   0 -12 -29 742.385 147.667   4
   0 -12 -30 1697.47 212.767   5
   0  12 -30 1494.50 225.759   4
   0 -12  30 1752.57 231.262   2
   0 -12 -30 2090.88 230.127   4
   0  12 -31 1.18720 84.1801   4
   0 -12  31 99.2001 76.9836   2
   0 -12 -31-50.4062 65.1678   5
   0 -12 -31 120.045 87.3297   4
   0 -12 -32-55.1198 74.8859   5
   0 -12 -32-14.8206 72.9937   4
   0 -12  32-120.895 111.915   2
   0  12 -33-98.4292 89.5777   4
   0 -12  33-93.8032 94.5270   2
   0 -12 -33-24.5898 72.3264   4
   0 -12 -33-86.7747 110.465   5
   0 -12 -34 167.284 100.168   4
   0 -12 -34-125.107 93.6258   5
   0  12 -34-132.984 93.9976   4
   0 -12  34-33.3845 80.1455   2
   0 -12 -35-9.04800 85.0400   5
   0 -12  35 14.3166 85.6801   2
   0 -12 -35 214.547 125.074   4
   0 -12 -36 182.942 102.548   4
   0 -12 -36-59.5924 101.501   5
   0  12 -36-122.727 121.698   4
   0 -12  36 169.792 82.9459   2
   0 -12  37 244.728 119.220   2
   0 -12 -37 323.339 125.536   5
   0  12 -37-125.447 122.371   4
   0 -12 -38-93.6936 85.7034   5
   0 -13   0 51.3641 36.9178   6
   0  13   0 58.1497 20.1337   5
   0  13   0 70.5911 45.0376   1
   0 -13   0 41.8896 28.0453   2
   0  13   0 30.8899 23.7957   2
   0  13   0 9.25769 46.4612   6
   0  13   1 83.0814 31.7169   2
   0 -13  -1 50.0357 30.0759   2
   0  13  -1 17.6141 16.7753   5
   0 -13  -1 25.1470 38.9600   6
   0  13  -1 34.0337 30.2576   2
   0  13   1 47.3283 49.4736   1
   0  13   1 64.8890 19.7380   5
   0 -13   1 13.0371 38.1962   6
   0  13  -1 50.2556 45.0729   6
   0 -13   1 78.7726 40.4198   2
   0  13   1 14.5200 41.7491   6
   0  13  -1 99.3817 56.1486   1
   0  13   2 2887.88 173.941   6
   0 -13  -2 3235.66 180.801   6
   0 -13   2 2912.76 163.727   6
   0  13  -2 2817.09 159.260   1
   0 -13  -2 3176.28 176.614   1
   0  13   2 3046.62 112.790   2
   0  13  -2 2908.63 167.566   6
   0  13   2 2874.42 166.656   1
   0  13   2 2692.51 71.8972   5
   0  13  -2 2917.84 142.441   2
   0 -13   2 2899.63 144.427   2
   0 -13  -2 2860.74 111.636   2
   0 -13  -3 42.0421 42.3960   6
   0 -13   3 58.6795 43.0117   6
   0  13  -3 77.4606 48.8994   6
   0 -13  -3 10.9168 33.5431   1
   0  13  -3-23.6885 42.0758   1
   0 -13  -3 123.084 33.9782   2
   0 -13  -3 11.6289 9.05333   5
   0  13  -3 47.1016 36.5209   2
   0  13   3 94.4118 63.8003   1
   0  13   3 272.134 82.9704   6
   0 -13   3 73.2983 49.0963   2
   0  13   3 55.1132 26.7955   2
   0  13   3 44.8226 17.8823   5
   0  13  -4 896.280 96.5420   6
   0 -13  -4 961.854 54.8732   2
   0 -13  -4 890.565 100.823   6
   0 -13  -4 660.986 38.2630   5
   0  13   4 905.576 51.7317   2
   0  13   4 821.930 108.395   6
   0 -13   4 904.478 98.6508   6
   0 -13  -4 970.015 102.541   1
   0  13   4 908.485 106.238   1
   0  13  -4 967.605 94.7870   2
   0 -13   4 931.323 95.4013   2
   0  13   5 4609.23 94.6081   2
   0 -13  -5 4303.81 95.6777   2
   0  13  -5 4712.19 212.207   6
   0 -13  -5 4560.84 111.866   5
   0 -13  -5 5051.70 232.616   1
   0  13  -5 5064.74 212.130   2
   0 -13   5 5053.69 232.388   4
   0  13   5 5172.73 240.421   6
   0 -13   5 4862.90 210.994   6
   0  13   5 4767.60 227.720   1
   0 -13   5 4941.63 212.703   2
   0 -13   6 325.568 71.7611   2
   0  13   6 346.591 79.7873   6
   0  13  -6 295.842 63.9181   2
   0  13  -6 221.340 53.3570   6
   0 -13  -6 295.303 35.1406   5
   0  13   6 296.228 76.4220   1
   0 -13  -7 127.929 28.9657   5
   0  13  -7 160.307 54.0797   2
   0 -13   7 177.199 64.8466   2
   0  13  -7 122.346 47.8765   6
   0 -13  -7 106.556 29.8447   3
   0 -13   8 7686.40 291.024   2
   0 -13  -8 7699.30 212.405   3
   0 -13  -8 7477.27 188.399   5
   0  13  -8 7499.68 270.940   6
   0 -13   9 2392.71 173.521   2
   0 -13  -9 2303.56 112.709   5
   0  13  -9 2596.10 162.038   6
   0 -13  -9 2498.21 116.779   3
   0 -13  10 2128.15 173.335   2
   0 -13 -10 2214.83 106.636   3
   0 -13 -10 2084.22 115.403   5
   0 -13 -10 2186.82 156.728   4
   0  13 -10 2140.60 158.999   6
   0 -13 -11 611.950 69.6505   5
   0 -13  11 572.716 94.7431   2
   0  13 -11 601.057 85.5252   6
   0 -13 -11 523.264 50.7919   3
   0 -13 -11 469.235 75.6370   4
   0 -13 -12 542.752 83.0009   4
   0 -13 -12 634.966 74.8115   5
   0 -13  12 547.331 98.7132   2
   0  13 -12 560.392 86.7391   6
   0 -13 -12 570.422 50.9355   3
   0 -13 -13 1359.73 129.486   4
   0 -13 -13 1435.35 75.7862   3
   0  13 -13 1191.80 142.637   4
   0 -13  13 1397.54 148.600   2
   0 -13 -13 1452.72 113.155   5
   0 -13 -14 2.38435 42.9720   4
   0 -13 -14 54.5736 40.6859   5
   0 -13 -14 3.49716 14.6813   3
   0  13 -14 28.2147 49.2383   4
   0 -13  14 34.6714 48.5429   2
   0 -13 -15 2194.28 173.672   4
   0 -13 -15 2355.00 157.909   5
   0  13 -15 1936.76 187.150   4
   0 -13  15 2028.39 187.903   2
   0  13  15 1817.46 68.8439   2
   0 -13  16 307.861 100.330   2
   0  13 -16 174.800 85.5079   4
   0 -13 -16 346.639 71.4917   5
   0  13  16 346.683 35.9005   2
   0 -13 -16 322.482 79.8184   4
   0 -13  17 483.173 105.166   2
   0  13  17 543.811 49.0788   2
   0 -13 -17 486.310 88.2086   4
   0 -13 -17 555.774 93.0003   5
   0  13 -17 486.765 114.185   4
   0 -13 -18 1331.97 136.636   5
   0  13  18 1212.48 78.2677   2
   0  13 -18 1316.62 161.307   4
   0 -13 -18 1038.31 131.264   4
   0 -13  18 1192.52 160.901   2
   0 -13  19 650.975 125.804   2
   0 -13 -19 335.852 72.6372   4
   0 -13 -19 538.631 95.6869   5
   0  13  19 583.732 58.2593   2
   0  13 -19 474.323 115.961   4
   0 -13 -20 240.469 78.7126   5
   0 -13 -20 29.8727 75.5114   4
   0  13 -20-13.1262 63.7445   4
   0  13  20 136.903 35.7486   2
   0 -13  20 130.870 71.7374   2
   0 -13 -21 143.453 56.6223   4
   0  13  21 309.569 49.0691   2
   0  13 -21-18.6063 58.2988   4
   0 -13  21 349.130 106.967   2
   0 -13 -21 360.555 94.0341   5
   0  13  22 930.622 87.2758   2
   0 -13 -22 667.525 113.523   4
   0  13 -22 861.143 145.552   4
   0 -13  22 961.735 158.123   2
   0 -13 -22 928.808 134.051   5
   0  13  23 2026.61 131.499   2
   0 -13 -23 1824.96 191.036   4
   0  13 -23 1724.07 201.599   4
   0 -13  23 1947.63 220.701   2
   0 -13 -23 1928.21 188.003   5
   0 -13 -24 17.3389 63.0414   4
   0  13  24 153.860 44.7477   2
   0  13 -24-7.89175 65.5411   4
   0 -13  24 278.050 114.193   2
   0 -13 -24 175.964 81.0753   5
   0 -13 -25 974.285 154.732   4
   0  13  25 902.387 94.4394   2
   0 -13  25 846.195 154.775   2
   0 -13 -25 1137.29 157.833   5
   0  13 -25 786.982 157.897   4
   0 -13 -26 914.564 147.145   5
   0  13 -26 764.435 154.912   4
   0 -13 -26 724.187 140.138   4
   0 -13  26 631.167 143.435   2
   0 -13 -27 2722.01 242.950   4
   0 -13 -27 2119.61 220.363   5
   0 -13  27 2354.03 255.539   2
   0  13 -27 1900.77 243.674   4
   0  13 -28 2030.29 252.501   4
   0 -13  28 2080.11 243.836   2
   0 -13 -28 2848.53 259.986   4
   0 -13 -28 2353.22 237.642   5
   0 -13 -29 796.683 167.558   4
   0 -13 -29 670.165 144.808   5
   0 -13  29 649.357 154.553   2
   0  13 -29 331.088 117.657   4
   0 -13 -30 261.288 104.047   5
   0 -13  30 296.856 115.497   2
   0  13 -30 173.976 108.616   4
   0 -13 -30 275.094 109.923   4
   0 -13  31 131.823 96.1264   2
   0  13 -31-28.2346 108.416   4
   0 -13 -31 162.490 84.6061   5
   0 -13 -31 114.030 74.9766   4
   0 -13 -32-249.715 119.133   5
   0 -13 -32-140.497 82.6958   4
   0  13 -32 59.3738 83.9943   4
   0 -13  32-99.4849 88.7166   2
   0 -13 -33 285.563 97.0742   4
   0  13 -33 132.108 81.8057   4
   0 -13  33 152.551 102.231   2
   0 -13 -33 136.752 85.9785   5
   0 -13  34 93.9658 94.3552   2
   0 -13 -34 65.2085 79.8250   4
   0 -13 -34 34.9614 82.6084   5
   0  13 -35 106.274 92.5926   4
   0 -13 -35 493.609 129.191   5
   0 -13 -35 471.629 146.639   4
   0 -13  35 568.617 158.488   2
   0  13 -36 142.872 83.1174   4
   0 -13 -36 246.279 101.712   5
   0 -13  36 107.392 97.6272   2
   0 -13 -37 106.344 108.339   5
   0 -13 -38 214.926 112.212   5
   0 -14   0 1574.39 133.058   6
   0  14   0 1532.70 127.738   1
   0  14   0 1540.20 97.9164   2
   0  14   0 1365.26 126.753   6
   0 -14   0 1296.98 90.8879   2
   0  14   0 1350.29 61.0344   5
   0  14   1 4398.08 215.314   6
   0  14   1 4745.24 157.994   2
   0  14  -1 4636.71 175.902   2
   0  14   1 4372.93 210.842   1
   0 -14  -1 4290.12 154.223   2
   0 -14   1 4300.55 173.463   2
   0  14  -1 4492.68 120.877   5
   0  14  -1 4026.35 208.750   6
   0 -14   1 4698.45 219.488   6
   0  14  -1 4164.10 202.816   1
   0  14   1 4254.50 97.8246   5
   0 -14  -1 4900.95 228.100   6
   0 -14  -2 956.116 105.880   1
   0 -14   2 967.115 92.6470   2
   0 -14  -2 953.301 110.002   6
   0  14   2 964.827 69.8356   2
   0  14   2 1001.35 114.895   6
   0  14  -2 857.398 61.9912   5
   0 -14   2 830.936 94.7838   6
   0  14  -2 1014.80 111.664   6
   0  14   2 738.786 40.7633   5
   0  14  -2 1004.14 91.1597   2
   0  14  -2 856.079 96.8515   1
   0 -14  -2 862.291 67.1580   2
   0  14   2 862.814 99.5670   1
   0  14   3 8722.58 184.752   2
   0  14  -3 8032.68 285.590   6
   0  14  -3 8480.42 281.490   1
   0 -14   3 8242.20 260.955   2
   0  14  -3 8849.94 266.227   2
   0  14   3 8148.13 299.834   6
   0 -14  -3 7426.81 117.264   5
   0 -14   3 8349.89 286.681   6
   0 -14  -3 8335.16 182.954   2
   0  14   3 8058.86 292.023   1
   0  14   3 7256.45 117.890   5
   0  14   4 8873.14 315.295   6
   0 -14   4 8606.50 291.877   6
   0  14   4 7978.29 296.041   1
   0  14   4 8903.91 167.273   2
   0 -14   4 8425.01 274.482   2
   0  14  -4 7957.42 287.468   6
   0  14  -4 8986.25 277.409   2
   0 -14  -4 8245.15 165.487   2
   0  14   5 785.973 124.182   6
   0 -14  -5 527.952 39.0154   2
   0  14  -5 605.822 84.7345   2
   0 -14   5 625.947 93.0653   2
   0  14  -5 357.347 73.7386   6
   0  14   5 764.330 117.043   1
   0 -14  -5 439.195 35.9154   5
   0 -14   5 537.889 86.8903   6
   0  14   5 628.750 42.3579   2
   0  14  -6 210.826 57.0850   6
   0  14  -6 281.453 60.9649   2
   0  14   6 195.666 72.0173   6
   0  14   6 320.867 76.0903   1
   0 -14   6 252.680 70.2908   2
   0 -14  -6 174.022 23.9582   5
   0  14  -7 97.7620 44.2497   6
   0 -14   7 204.392 71.7241   2
   0 -14  -7 142.314 39.6522   3
   0  14   7 204.296 81.8478   6
   0 -14  -7 125.772 26.3411   5
   0 -14  -8 36.9586 22.2805   5
   0  14  -8 20.6924 39.3068   6
   0 -14  -8 30.3952 29.4714   3
   0 -14   8 90.8167 60.8784   2
   0 -14   9 442.151 93.3353   2
   0 -14  -9 313.009 42.7022   5
   0  14  -9 304.421 58.8603   6
   0 -14  -9 383.389 50.6340   3
   0  14 -10 6687.24 271.772   6
   0 -14 -10 6778.69 196.017   3
   0 -14 -10 6545.68 274.913   4
   0 -14  10 6788.10 299.305   2
   0 -14 -10 6607.71 200.547   5
   0 -14 -11 2911.78 142.984   5
   0 -14 -11 3021.49 127.401   3
   0 -14 -11 2740.76 182.424   4
   0  14 -11 3102.75 186.454   6
   0 -14  11 2855.56 202.434   2
   0 -14 -12 406.167 48.0447   3
   0 -14 -12 370.888 61.5817   5
   0 -14  12 329.543 88.0062   2
   0  14 -12 442.387 84.6640   6
   0 -14 -12 270.397 59.6786   4
   0 -14  13 2564.88 205.746   2
   0 -14 -13 2505.63 181.015   4
   0 -14 -13 2785.15 156.577   5
   0  14 -13 2744.23 184.997   6
   0 -14 -13 2542.89 107.790   3
   0 -14 -14 795.595 57.8121   3
   0 -14  14 990.599 138.056   2
   0 -14 -14 1059.62 109.258   5
   0 -14 -14 932.850 124.303   4
   0  14 -14 900.937 109.705   6
   0 -14 -15 863.941 102.328   5
   0  14 -15 623.695 119.782   4
   0 -14 -15 616.299 99.8988   4
   0 -14  15 896.036 142.358   2
   0  14 -16 3112.07 247.941   4
   0 -14 -16 3535.53 207.269   5
   0 -14 -16 3285.72 223.922   4
   0 -14  16 3018.77 237.001   2
   0 -14 -17 2966.33 187.788   5
   0 -14  17 2641.12 227.424   2
   0 -14 -17 2665.53 202.583   4
   0  14 -17 2497.94 225.064   4
   0  14  17 2519.36 86.9110   2
   0  14 -18-181.149 76.2518   4
   0 -14 -18 32.4695 39.3865   5
   0 -14 -18-122.539 96.1035   4
   0 -14  18 83.0530 61.3846   2
   0  14  18 17.2308 12.6251   2
   0  14 -19 242.638 83.6561   4
   0 -14  19 424.315 101.110   2
   0  14  19 371.101 42.5042   2
   0 -14 -19 280.472 69.1122   4
   0 -14 -19 404.043 80.8607   5
   0 -14 -20 2132.67 214.595   4
   0  14  20 1912.87 100.893   2
   0  14 -20 1513.32 178.942   4
   0 -14 -20 1894.95 172.509   5
   0 -14  20 2112.81 213.788   2
   0  14  21-4.60574 18.1691   2
   0 -14 -21 54.2360 58.0977   5
   0 -14  21-49.2294 55.5207   2
   0  14 -21-88.8410 96.1964   4
   0 -14 -21-113.351 89.3048   4
   0  14 -22 1.07050 78.9550   4
   0 -14  22 206.038 90.8253   2
   0  14  22 82.5026 26.4679   2
   0 -14 -22-10.1373 65.7625   4
   0 -14 -22 169.525 68.2013   5
   0 -14  23 163.174 91.4849   2
   0  14 -23-29.3912 80.4049   4
   0 -14 -23-4.27355 59.4126   4
   0 -14 -23 84.0624 50.1600   5
   0  14  23 127.827 34.8856   2
   0 -14  24 299.709 110.019   2
   0  14 -24 276.610 102.670   4
   0 -14 -24 307.882 83.2433   4
   0 -14 -24 541.079 110.785   5
   0  14  24 348.606 54.8413   2
   0 -14  25 249.160 113.936   2
   0  14 -25 72.8143 70.5399   4
   0 -14 -25 139.886 79.4290   5
   0 -14 -25 129.534 84.2758   4
   0 -14 -26 124.356 87.6687   5
   0 -14  26 124.026 84.8439   2
   0 -14 -26 254.731 118.187   4
   0  14 -26-32.9627 75.5490   4
   0 -14 -27 504.845 151.183   4
   0  14 -27 136.012 117.049   4
   0 -14  27 156.199 96.3887   2
   0 -14 -27 275.527 103.607   5
   0 -14 -28 924.881 154.592   5
   0 -14 -28 1468.34 195.172   4
   0 -14  28 728.355 161.408   2
   0  14 -28 728.427 172.112   4
   0 -14 -29 3542.54 288.633   4
   0  14 -29 2664.56 288.790   4
   0 -14  29 2814.09 289.855   2
   0 -14 -29 3138.40 276.351   5
   0 -14 -30 645.115 138.477   5
   0 -14 -30 697.422 142.833   4
   0 -14  30 332.504 127.984   2
   0  14 -30 323.442 96.1475   4
   0 -14 -31-86.9896 80.2972   5
   0  14 -31-156.872 119.424   4
   0 -14  31 11.6976 76.1646   2
   0 -14 -31-14.4827 61.1399   4
   0 -14  32 29.2815 82.4078   2
   0  14 -32-67.0840 89.7231   4
   0 -14 -32 73.5426 72.3166   4
   0 -14 -32 34.3774 70.3501   5
   0  14 -33-27.1055 91.8689   4
   0 -14  33 324.115 138.128   2
   0 -14 -33 234.468 93.5313   5
   0 -14 -33 259.443 110.025   4
   0  14 -34 9.98097 108.732   4
   0 -14 -34 270.109 127.757   4
   0 -14  34 334.150 131.780   2
   0 -14 -34 87.8490 96.6511   5
   0 -14 -35 212.950 110.597   4
   0 -14  35 349.809 127.606   2
   0 -14 -35 47.8612 76.7235   5
   0  14 -35-16.2508 115.040   4
   0  14 -36 163.862 102.230   4
   0 -14 -36 259.930 115.693   5
   0 -14 -37 104.060 90.2475   5
   0 -14 -38-10.7720 81.8123   5
   0  15   0-3.04051 41.9916   1
   0  15   0 15.9650 14.2880   5
   0  15   0 14.6246 23.4404   2
   0 -15   0 14.9817 25.2289   2
   0  15   0-17.4233 47.0996   6
   0  15   1 163.526 37.8484   2
   0  15   1 127.490 22.6550   5
   0  15   1 143.806 59.0324   1
   0  15  -1 170.065 61.6222   1
   0  15  -1 131.349 27.9369   5
   0 -15  -1 137.932 37.3041   2
   0  15  -1 93.6376 57.2044   6
   0  15   1 164.572 62.3139   6
   0  15  -1 130.080 39.7783   2
   0 -15   1 129.828 40.2949   2
   0  15   2 82.4697 16.9419   5
   0  15  -2 122.135 59.6925   6
   0  15  -2 39.5573 37.8026   1
   0 -15  -2 107.599 30.9248   2
   0 -15   2 72.1141 35.2578   2
   0  15  -2 101.070 26.1789   5
   0  15   2 57.4393 27.1057   2
   0  15  -2 125.892 42.5093   2
   0  15   2 41.0025 37.9442   1
   0  15   2 62.9865 51.7548   6
   0 -15  -3 296.958 44.1737   2
   0  15  -3 305.824 77.9629   6
   0  15  -3 289.774 61.8154   2
   0  15   3 261.556 77.9766   1
   0  15   3 212.270 37.9005   2
   0  15  -3 235.860 72.0931   1
   0 -15   3 242.253 64.8407   2
   0  15   3 169.347 21.1349   5
   0  15   3 272.230 85.5228   6
   0  15  -4 407.014 85.7412   1
   0 -15  -4 294.444 27.1121   5
   0 -15   4 692.676 94.7405   2
   0 -15  -4 481.348 48.9392   2
   0  15   4 687.293 119.655   6
   0  15   4 476.119 46.4913   2
   0  15  -4 450.411 81.9182   6
   0  15  -4 514.765 81.1694   2
   0  15   4 603.610 108.646   1
   0  15  -5 9915.63 325.996   6
   0  15   5 9613.41 161.272   2
   0  15   5 9691.94 346.209   6
   0 -15   5 9447.22 310.880   2
   0 -15  -5 9358.99 163.805   2
   0  15   5 9022.10 327.796   1
   0  15  -5 10608.5 319.965   2
   0 -15  -6 2586.07 91.1560   5
   0  15  -6 2408.06 164.287   6
   0 -15   6 2725.34 175.881   2
   0  15   6 2614.40 192.103   1
   0  15   6 2724.01 194.244   6
   0  15   7 8676.91 347.514   6
   0  15   7 8699.97 329.346   1
   0 -15  -7 9609.13 268.771   3
   0 -15   7 8878.68 319.902   2
   0  15  -7 8941.13 315.809   6
   0 -15  -7 8774.26 181.515   5
   0 -15  -8 853.042 81.7483   3
   0  15  -8 892.166 107.741   6
   0 -15  -8 769.966 61.7683   5
   0 -15   8 732.349 106.658   2
   0  15  -9 6394.54 270.884   6
   0 -15  -9 5989.14 177.083   5
   0 -15   9 5979.49 279.600   2
   0 -15  -9 6376.90 206.131   3
   0 -15 -10 1406.01 91.5113   5
   0 -15  10 1632.36 157.398   2
   0 -15 -10 1459.30 97.1157   3
   0  15 -10 1330.07 126.350   6
   0  15 -11 2371.61 174.846   6
   0 -15 -11 2494.07 122.719   3
   0 -15  11 2572.71 194.838   2
   0 -15 -11 2534.04 131.827   5
   0 -15 -11 2282.37 169.431   4
   0 -15  12 2417.83 194.099   2
   0 -15 -12 2694.99 122.350   3
   0 -15 -12 2282.26 174.000   4
   0  15 -12 2548.37 185.095   6
   0 -15 -12 2597.32 139.768   5
   0  15 -13 5633.29 269.777   6
   0 -15 -13 5361.59 268.891   4
   0 -15  13 5227.95 290.866   2
   0 -15 -13 5458.79 216.185   5
   0 -15 -13 5532.96 168.811   3
   0 -15 -14 1852.98 138.248   5
   0  15 -14 1699.79 155.033   6
   0 -15 -14 1552.27 154.236   4
   0 -15 -14 1369.06 80.8675   3
   0 -15  14 1780.14 184.880   2
   0 -15 -15 6180.90 248.554   5
   0 -15  15 5523.39 313.195   2
   0 -15 -15 5199.07 150.939   3
   0 -15 -15 5715.77 290.139   4
   0  15 -15 5881.00 279.134   6
   0 -15  16 407.890 101.914   2
   0 -15 -16 370.221 89.0901   4
   0 -15 -16 395.054 77.7885   5
   0  15 -17 602.100 122.405   4
   0 -15  17 764.541 127.278   2
   0 -15 -17 999.888 114.662   5
   0 -15 -17 1050.72 136.382   4
   0 -15 -18 101.148 56.6693   4
   0 -15 -18 143.639 56.7275   5
   0 -15  18 110.555 55.5516   2
   0  15 -18 65.6102 54.8085   4
   0  15 -19-40.2320 76.1860   4
   0  15  19 2.11625 10.3610   2
   0 -15  19-77.0114 65.4838   2
   0 -15 -19-197.055 97.2460   4
   0 -15 -19-11.0227 37.8179   5
   0 -15  20 61.1751 54.9709   2
   0  15 -20-161.211 99.6201   4
   0  15  20 2.00301 12.3228   2
   0 -15 -20 83.4459 54.6075   5
   0  15  21 102.848 24.1632   2
   0 -15 -21 121.180 60.5945   5
   0 -15 -21-34.8260 66.2294   4
   0 -15  21 236.954 97.5207   2
   0  15 -21 61.3685 65.2323   4
   0 -15 -22 618.685 105.718   5
   0 -15 -22 359.903 89.1439   4
   0  15  22 494.033 53.4800   2
   0 -15  22 439.298 109.958   2
   0  15 -22 230.340 89.7605   4
   0 -15  23 417.049 130.365   2
   0  15 -23 238.243 97.6143   4
   0 -15 -23 165.175 78.1163   4
   0 -15 -23 396.751 100.598   5
   0 -15  24 820.281 160.927   2
   0  15 -24 528.292 147.448   4
   0 -15 -24 703.157 125.085   5
   0 -15 -24 385.091 97.4661   4
   0  15 -25 1034.58 176.926   4
   0 -15  25 1219.22 189.071   2
   0 -15 -25 1054.41 143.975   5
   0 -15 -25 955.218 153.624   4
   0 -15 -26 433.479 101.742   5
   0 -15 -26 659.790 145.846   4
   0  15 -26 148.905 85.8948   4
   0 -15  26 459.511 128.535   2
   0 -15 -27 193.759 80.1401   5
   0 -15  27 136.656 95.8474   2
   0  15 -28-101.424 86.0360   4
   0 -15 -28-50.0559 67.1248   5
   0 -15  28-48.6589 76.5453   2
   0 -15 -29 183.720 84.1874   5
   0  15 -29 281.617 120.417   4
   0 -15  29 275.969 110.242   2
   0 -15 -29 663.049 161.672   4
   0  15 -30-62.1543 85.4721   4
   0 -15  30 34.8712 75.4110   2
   0 -15 -30 68.1026 67.0907   5
   0 -15 -31 256.314 92.9158   5
   0 -15 -31 331.544 113.740   4
   0 -15  31 257.092 119.774   2
   0  15 -31 131.963 77.4085   4
   0 -15 -32 322.153 130.339   4
   0  15 -32-16.4598 106.335   4
   0 -15 -32 181.337 86.4475   5
   0 -15  32 71.4819 79.1934   2
   0  15 -33-104.106 115.115   4
   0 -15  33 67.8629 108.618   2
   0 -15 -33 270.611 108.604   4
   0 -15 -33 177.680 91.6289   5
   0  15 -34 544.325 163.764   4
   0 -15 -34 968.760 181.310   5
   0 -15  34 909.525 194.697   2
   0 -15 -34 1151.65 209.141   4
   0 -15 -35 75.2602 82.3802   5
   0  15 -35-55.0269 98.0712   4
   0 -15  35-13.9652 85.2199   2
   0 -15 -36 196.708 96.8885   5
   0  16   0 435.605 58.0378   2
   0  16   0 402.345 36.8359   5
   0 -16   0 391.514 56.6073   2
   0  16   0 468.523 80.6112   6
   0  16   0 327.848 70.1847   1
   0  16  -1 244.403 32.5018   5
   0  16   1 285.394 70.2027   1
   0  16  -1 278.061 51.7625   2
   0  16   1 246.093 42.2212   2
   0  16   1 257.609 69.0097   6
   0  16  -1 185.736 55.0659   1
   0  16   1 211.687 24.8999   5
   0  16  -1 233.109 61.6257   6
   0 -16  -1 233.333 42.1889   2
   0 -16   1 204.794 45.3605   2
   0  16   2 690.091 39.5994   5
   0  16   2 758.750 66.3077   2
   0  16  -2 700.534 97.1909   1
   0 -16   2 707.005 80.3068   2
   0  16  -2 648.664 79.3820   2
   0  16  -2 626.704 93.8301   6
   0  16   2 642.067 98.3819   1
   0 -16  -2 704.475 64.9064   2
   0  16  -2 702.974 55.5562   5
   0  16   2 801.949 105.668   6
   0  16  -3 303.405 71.4979   6
   0  16   3 307.662 73.5543   1
   0  16   3 310.813 43.0193   2
   0  16   3 216.398 22.9777   5
   0 -16   3 284.111 58.8299   2
   0  16  -3 380.166 66.5568   2
   0  16  -3 269.730 73.0985   1
   0 -16  -3 326.721 45.9956   2
   0  16   3 344.287 83.0524   6
   0 -16  -4 3018.94 78.0477   5
   0  16   4 3530.17 211.095   1
   0  16   4 3757.73 120.715   2
   0  16  -4 3455.56 194.122   1
   0 -16   4 3440.91 185.964   2
   0  16  -4 3288.83 199.242   6
   0 -16  -4 3452.39 119.757   2
   0  16   4 3460.87 214.152   6
   0  16  -4 3752.03 189.161   2
   0 -16  -5 424.018 33.4610   5
   0  16   5 607.616 109.620   1
   0  16   5 651.929 48.4838   2
   0 -16  -5 677.018 49.9421   2
   0  16   5 662.048 113.701   6
   0  16  -5 733.978 96.4083   2
   0 -16   5 753.901 105.387   2
   0  16  -5 616.668 96.1733   6
   0 -16  -6 1117.50 58.3347   5
   0 -16  -6 1115.70 52.4855   2
   0  16   6 1392.11 136.944   1
   0 -16   6 1375.14 130.561   2
   0  16  -6 1269.44 126.298   6
   0  16   6 1299.79 141.604   6
   0 -16   7 1339.60 136.474   2
   0  16   7 1256.76 150.031   6
   0 -16  -7 1316.52 105.704   3
   0  16   7 1189.54 135.308   1
   0 -16  -7 1051.93 61.3418   5
   0  16  -7 1116.73 125.538   6
   0 -16  -8 652.225 76.2691   3
   0  16  -8 608.466 93.0368   6
   0 -16  -8 594.938 51.1171   5
   0 -16   8 756.001 108.336   2
   0 -16  -9 25.6479 31.5710   3
   0  16  -9 7.70944 37.8888   6
   0 -16  -9 13.7821 20.9853   5
   0 -16   9 98.1593 68.2299   2
   0 -16 -10 42.3350 30.4228   3
   0 -16  10 70.7549 60.0653   2
   0 -16 -10-31.3325 26.7672   5
   0  16 -10 75.3769 52.9263   6
   0 -16 -11 346.262 52.8849   3
   0 -16 -11 266.011 64.6430   4
   0 -16  11 418.161 88.4964   2
   0 -16 -11 323.831 53.0911   5
   0  16 -11 310.477 73.9657   6
   0 -16 -12 2308.20 120.331   3
   0  16 -12 2562.74 185.098   6
   0 -16 -12 2172.29 177.071   4
   0 -16 -12 2303.95 134.160   5
   0 -16  12 2516.74 202.969   2
   0 -16 -13 3554.85 171.191   5
   0 -16  13 3139.09 232.141   2
   0  16 -13 3601.61 220.885   6
   0 -16 -13 3349.26 218.284   4
   0 -16 -13 3406.55 140.572   3
   0 -16  14 6767.41 344.921   2
   0 -16 -14 7321.22 256.843   5
   0 -16 -14 7230.34 196.052   3
   0 -16 -14 7054.26 314.524   4
   0  16 -14 7705.73 328.776   6
   0  16 -15 964.227 123.448   6
   0 -16  15 1040.01 148.919   2
   0 -16 -15 837.878 63.4200   3
   0 -16 -15 780.749 109.774   4
   0 -16 -15 923.549 97.9084   5
   0  16 -16 1425.36 154.743   6
   0 -16 -16 1075.74 68.7272   3
   0 -16  16 1298.07 162.520   2
   0 -16 -16 1337.09 120.923   5
   0 -16 -16 1216.78 139.445   4
   0  16 -17 70.6596 49.5692   6
   0 -16  17-83.4343 77.7725   2
   0 -16 -17 40.6069 53.7898   4
   0 -16 -17 16.6381 37.2791   5
   0  16 -18 329.149 73.1609   6
   0 -16 -18 365.681 87.3943   4
   0 -16  18 421.266 102.481   2
   0 -16 -18 358.619 67.6706   5
   0  16 -19 23.5150 57.6821   4
   0 -16 -19 64.6672 47.7510   5
   0 -16 -19-81.2920 96.3417   4
   0 -16  19 144.760 69.5899   2
   0 -16 -20 578.322 96.2006   5
   0 -16  20 641.776 127.026   2
   0  16 -20 344.358 97.5946   4
   0 -16 -20 275.383 73.4994   4
   0 -16 -21 1.48294 81.1014   4
   0  16  21 147.631 25.1003   2
   0 -16 -21 170.350 62.5855   5
   0 -16  21 90.2414 67.2920   2
   0  16 -21 63.2639 62.6854   4
   0 -16  22 1232.02 186.601   2
   0  16 -22 822.702 149.267   4
   0 -16 -22 817.479 127.210   4
   0 -16 -22 1105.60 141.246   5
   0  16 -23 2798.67 279.050   4
   0 -16 -23 3333.88 239.569   5
   0 -16  23 3106.20 283.350   2
   0 -16 -23 2701.31 235.747   4
   0 -16 -24 1693.62 190.018   4
   0 -16 -24 2017.83 195.503   5
   0 -16  24 2138.22 237.705   2
   0  16 -24 1800.62 222.899   4
   0 -16  25 24.3534 69.2667   2
   0  16 -25-121.959 95.7915   4
   0 -16 -25 14.6686 57.5956   5
   0 -16 -25-69.4457 68.5571   4
   0  16 -26-101.280 101.761   4
   0 -16 -26 67.1810 83.4480   4
   0 -16  26 102.454 85.7196   2
   0 -16 -26 28.7711 57.9664   5
   0 -16  27 389.747 121.276   2
   0 -16 -27 604.279 161.819   4
   0 -16 -27 712.909 130.916   5
   0  16 -27 332.729 99.5529   4
   0 -16 -28 953.930 176.735   4
   0 -16  28 539.934 131.422   2
   0  16 -28 401.095 118.309   4
   0 -16 -28 502.750 111.807   5
   0 -16  29 73.1268 77.0314   2
   0 -16 -29 108.653 84.0230   5
   0  16 -29-58.7891 100.826   4
   0 -16  30 154.744 116.339   2
   0 -16 -30 485.367 133.526   4
   0  16 -30 44.0761 97.1093   4
   0 -16 -30 197.656 82.6730   5
   0 -16  31 879.612 180.065   2
   0 -16 -31 971.118 174.918   4
   0 -16 -31 466.639 107.120   5
   0  16 -31 529.683 144.488   4
   0 -16 -32 698.398 142.567   5
   0 -16 -32 1215.17 190.388   4
   0 -16  32 566.853 164.125   2
   0  16 -32 381.603 128.881   4
   0  16 -33-147.908 113.542   4
   0 -16  33 205.223 115.671   2
   0 -16 -33 63.6285 80.5190   5
   0 -16 -33 133.871 95.3881   4
   0 -16 -34 654.885 145.773   5
   0 -16  34 727.527 173.113   2
   0 -16 -34 1043.02 193.301   4
   0  16 -34 381.808 141.015   4
   0 -16 -35-81.9173 90.1116   5
   0  16 -35-130.861 131.224   4
   0  17   0 34.6747 17.9708   5
   0  17   0-18.5275 47.7327   6
   0 -17   0 85.9859 41.1651   2
   0  17   0 97.0322 55.0873   1
   0  17   0-12.8190 22.8207   2
   0  17  -1 367.493 63.3261   2
   0  17  -1 322.203 40.9503   5
   0  17   1 396.629 59.4223   2
   0  17   1 385.236 96.3666   6
   0  17   1 418.406 99.6601   1
   0 -17   1 436.319 75.4199   2
   0  17  -1 515.653 100.750   6
   0 -17  -1 382.036 63.7872   2
   0  17   1 337.450 33.7781   5
   0  17  -1 328.862 93.1199   1
   0  17   2 1610.25 152.773   6
   0  17   2 1922.39 158.922   1
   0 -17  -2 1843.10 108.127   2
   0  17  -2 1956.41 156.494   1
   0  17  -2 2013.98 132.766   2
   0  17  -2 1747.04 150.888   6
   0 -17   2 1797.83 130.138   2
   0  17   2 1959.62 108.625   2
   0  17  -2 2118.36 96.2745   5
   0  17   2 1659.93 61.5258   5
   0  17  -3 2184.34 162.309   1
   0  17   3 2538.29 114.468   2
   0  17   3 2249.39 171.379   1
   0  17   3 1871.60 61.3572   5
   0  17   3 2177.74 172.153   6
   0  17  -3 2505.68 154.860   2
   0 -17  -3 2419.83 114.567   2
   0  17  -3 2368.72 108.750   5
   0 -17   3 2213.95 147.706   2
   0  17  -3 2141.77 166.220   6
   0 -17   4 455.375 78.4938   2
   0  17  -4 465.150 86.8646   6
   0  17   4 517.082 100.750   6
   0  17   4 571.849 52.9449   2
   0  17  -4 395.776 79.4237   1
   0  17  -4 645.100 87.3305   2
   0 -17  -4 496.741 51.4212   2
   0  17   4 566.355 100.248   1
   0 -17  -5 547.384 36.2545   5
   0  17  -5 524.016 85.0345   1
   0 -17  -5 572.908 47.5104   2
   0  17   5 625.091 47.5676   2
   0  17   5 653.758 100.353   6
   0  17  -5 660.863 101.150   6
   0 -17   5 659.742 95.1614   2
   0  17   5 690.716 101.260   1
   0 -17  -6 362.371 33.1876   5
   0 -17  -6 377.901 35.1202   2
   0 -17   6 424.793 78.8974   2
   0  17   6 355.991 85.6583   1
   0  17   6 442.531 91.2358   6
   0  17  -6 319.542 69.6940   6
   0 -17   7 2686.84 185.525   2
   0  17   7 2504.30 189.001   1
   0  17   7 2477.15 197.916   6
   0 -17  -7 2947.08 163.610   3
   0  17  -7 2565.24 182.136   6
   0 -17  -7 2703.87 96.4529   5
   0 -17  -8 2024.07 91.1725   5
   0  17  -8 2296.69 172.893   6
   0 -17  -8 2251.74 137.575   3
   0 -17   8 2328.40 179.898   2
   0  17  -9 1245.40 133.679   6
   0 -17  -9 1302.19 79.8468   5
   0 -17   9 1380.77 146.922   2
   0 -17  -9 1609.35 117.032   3
   0 -17 -10 2772.80 126.652   5
   0 -17  10 2744.77 204.529   2
   0  17 -10 2563.54 187.634   6
   0 -17 -10 3043.62 154.907   3
   0 -17 -11 3651.98 162.524   3
   0 -17  11 3689.67 243.544   2
   0  17 -11 3802.35 228.413   6
   0 -17 -11 3651.44 153.685   5
   0 -17  12 3805.83 254.356   2
   0 -17 -12 3907.40 169.516   5
   0 -17 -12 3778.84 231.685   4
   0  17 -12 3674.18 228.971   6
   0 -17 -12 3945.99 164.581   3
   0 -17 -13 4735.18 194.386   5
   0 -17 -13 4480.83 168.760   3
   0 -17 -13 4220.72 249.827   4
   0  17 -13 4454.00 253.933   6
   0 -17  13 4657.58 283.999   2
   0 -17 -14 146.124 33.1574   3
   0  17 -14 258.692 75.9611   6
   0 -17 -14 238.032 55.3475   5
   0 -17  14 369.740 106.766   2
   0 -17 -14 158.776 69.1696   4
   0 -17 -15 472.967 71.9755   5
   0 -17 -15 424.360 46.7081   3
   0 -17 -15 286.631 80.0362   4
   0 -17  15 329.012 75.1727   2
   0  17 -15 564.988 100.713   6
   0 -17 -16 74.7691 34.5607   5
   0 -17 -16 47.7920 16.8475   3
   0 -17 -16 62.2887 42.9159   4
   0  17 -16 49.1659 47.7082   6
   0 -17  16-69.7758 75.0924   2
   0 -17 -17 262.747 71.7801   4
   0  17 -17 287.653 78.5256   6
   0 -17  17 143.965 57.5736   2
   0 -17 -17 234.788 57.0281   5
   0 -17 -18 523.208 103.629   4
   0 -17  18 576.493 124.807   2
   0  17 -18 610.031 107.914   6
   0 -17 -18 630.053 92.3607   5
   0 -17 -19 348.786 91.9874   4
   0 -17  19 275.109 99.4920   2
   0  17 -19 147.053 68.0296   6
   0 -17 -19 175.801 55.9785   5
   0 -17 -20 321.004 74.7082   4
   0 -17 -20 527.941 101.957   5
   0  17 -20 315.534 92.4831   6
   0 -17  20 580.803 127.429   2
   0 -17 -21 800.339 117.816   5
   0 -17  21 886.627 153.165   2
   0 -17 -21 534.390 98.3151   4
   0 -17 -22 257.721 76.2411   5
   0 -17  22 198.475 99.4683   2
   0 -17 -22-83.0036 86.8230   4
   0 -17 -23 94.1444 59.5092   5
   0  17 -23-72.5240 90.3346   4
   0 -17 -23-162.878 94.0645   4
   0 -17  23 105.474 86.0578   2
   0 -17 -24 306.289 94.8836   5
   0 -17 -24 170.824 74.6718   4
   0 -17  24 242.089 96.4141   2
   0  17 -24 117.866 90.5281   4
   0 -17 -25 998.028 152.383   4
   0 -17  25 1069.32 180.743   2
   0  17 -25 871.601 164.938   4
   0 -17 -25 1201.40 161.604   5
   0  17 -26 779.545 169.410   4
   0 -17 -26 937.092 143.589   5
   0 -17 -26 803.292 142.404   4
   0 -17  26 864.366 161.748   2
   0 -17 -27 43.4249 86.3137   4
   0  17 -27-49.5884 81.9475   4
   0 -17  27-34.1597 65.9622   2
   0 -17 -27-59.5734 73.6166   5
   0 -17 -28 940.949 162.747   4
   0  17 -28 584.193 146.054   4
   0 -17  28 454.744 133.023   2
   0 -17 -28 630.169 132.093   5
   0  17 -29 56.2022 72.3472   4
   0 -17  29 22.1835 73.9553   2
   0 -17 -29 51.9880 69.3363   5
   0  17 -30 34.0129 77.0819   4
   0 -17 -30 287.350 127.120   4
   0 -17 -30 40.6474 59.1895   5
   0 -17  30 165.256 115.950   2
   0 -17  31-63.3116 84.0981   2
   0  17 -31-72.1349 85.7544   4
   0 -17 -31-62.8025 86.2145   5
   0 -17 -32 99.7222 87.3205   5
   0  17 -32-0.18370 77.2041   4
   0 -17  32 126.036 93.3651   2
   0 -17  33 104.769 82.3243   2
   0  17 -33-57.4860 98.5979   4
   0 -17 -33 181.815 107.487   4
   0 -17  34 49.4155 89.6294   2
   0  17 -34-12.2708 90.3215   4
   0  18   0 8793.04 342.275   1
   0 -18   0 9403.82 276.272   2
   0  18   0 8673.23 347.833   6
   0  18   0 8750.68 169.766   5
   0  18   0 10028.7 277.503   2
   0  18   1 18521.2 498.397   6
   0 -18  -1 17754.5 359.714   2
   0  18  -1 17639.1 484.285   6
   0  18   1 18720.4 359.213   2
   0  18  -1 18917.3 395.278   2
   0  18  -1 17041.2 468.572   1
   0  18   1 16765.5 211.208   5
   0  18   1 17750.5 479.136   1
   0 -18   1 17532.0 390.506   2
   0  18  -1 17940.6 261.380   5
   0  18  -2 460.426 74.4731   2
   0  18   2 544.247 119.132   6
   0  18  -2 318.698 74.8709   1
   0 -18   2 377.287 70.1879   2
   0  18   2 335.450 29.0871   5
   0  18   2 494.839 123.716   1
   0  18   2 484.562 59.4240   2
   0 -18  -2 483.241 63.6160   2
   0  18  -2 266.082 37.9505   5
   0  18  -2 191.437 66.8698   6
   0  18   3 565.225 58.9771   2
   0  18   3 359.501 84.4434   1
   0  18  -3 525.265 55.3350   5
   0  18   3 610.360 104.713   6
   0 -18  -3 685.719 67.8080   2
   0  18  -3 554.662 96.5828   1
   0  18  -3 476.425 83.2613   6
   0  18  -3 653.264 84.9678   2
   0  18   3 335.937 28.9559   5
   0 -18   3 576.184 82.8813   2
   0  18   4 1180.23 137.523   6
   0  18  -4 1062.02 124.126   6
   0  18  -4 1169.78 124.261   1
   0  18   4 972.311 118.071   1
   0 -18  -4 1171.14 77.8817   2
   0 -18   4 1080.22 115.545   2
   0  18   4 1283.26 77.5719   2
   0  18   5 134.103 64.5024   6
   0 -18  -5 81.0647 24.1412   2
   0  18  -5 34.0451 43.1922   6
   0 -18   5 8.61638 37.8026   2
   0 -18  -5 76.9017 15.6091   5
   0  18  -5-40.5674 55.1192   1
   0  18   5 24.9895 45.2475   1
   0  18   5 93.7902 23.1332   2
   0  18   6 527.991 93.5313   1
   0 -18  -6 437.358 38.4240   2
   0 -18   6 569.089 91.1072   2
   0 -18  -6 430.362 34.0305   5
   0  18   6 549.284 103.277   6
   0  18  -6 482.247 85.6041   6
   0  18  -6 459.016 78.1568   1
   0  18   7 856.682 122.422   6
   0 -18  -7 803.628 88.9378   3
   0  18   7 793.726 118.829   1
   0 -18   7 770.688 105.677   2
   0  18  -7 783.608 110.594   6
   0 -18  -7 728.379 49.4622   5
   0  18  -8 3133.93 212.062   6
   0 -18  -8 3219.02 173.276   3
   0 -18  -8 3133.26 110.618   5
   0 -18   8 3189.01 213.270   2
   0  18  -9 6701.71 305.421   6
   0 -18   9 6438.96 307.057   2
   0 -18  -9 6474.49 173.046   5
   0 -18  -9 6990.23 246.439   3
   0 -18 -10 476.357 66.0775   3
   0 -18 -10 396.495 48.4455   5
   0 -18  10 468.138 102.246   2
   0  18 -10 338.884 82.8917   6
   0 -18  11 3315.83 233.364   2
   0  18 -11 3471.86 224.663   6
   0 -18 -11 3442.70 164.339   3
   0 -18 -11 3455.28 146.442   5
   0 -18 -12-93.5303 64.6886   4
   0 -18 -12 2.70588 26.5934   5
   0  18 -12 81.3807 67.0500   6
   0 -18  12-23.3255 49.0047   2
   0 -18 -12-13.5264 23.3216   3
   0  18 -13 317.835 80.1641   6
   0 -18 -13 194.054 56.9699   4
   0 -18 -13 445.012 62.0630   5
   0 -18 -13 315.411 46.3381   3
   0 -18  13 268.904 88.1207   2
   0  18 -14 92.5902 53.5408   6
   0 -18 -14 241.831 47.3924   3
   0 -18 -14 397.552 66.6819   5
   0 -18 -14 343.526 78.0180   4
   0 -18  14 32.7743 55.5350   2
   0 -18  15 222.101 66.3599   2
   0 -18 -15 405.530 50.4148   3
   0  18 -15 416.688 85.7264   6
   0 -18 -15 430.090 66.5746   5
   0 -18 -15 307.914 70.0765   4
   0 -18 -16 124.605 49.4621   5
   0 -18 -16 75.9760 41.3408   4
   0 -18 -16 45.5808 22.6461   3
   0 -18  16 110.596 61.4766   2
   0  18 -16 43.0023 47.1518   6
   0 -18  17 261.080 93.6284   2
   0 -18 -17 211.836 70.0875   4
   0 -18 -17 234.048 61.9378   5
   0  18 -17 360.784 88.0577   6
   0 -18  18 60.7891 55.2777   2
   0 -18 -18-7.26996 41.1878   4
   0 -18 -18 91.8013 48.7110   5
   0  18 -18 72.4395 59.8269   6
   0  18 -19 4497.09 273.141   6
   0 -18 -19 4550.09 244.340   5
   0 -18 -19 4281.09 281.455   4
   0 -18  19 4396.31 316.983   2
   0 -18  20 163.017 91.2239   2
   0 -18 -20 156.649 62.3005   5
   0 -18 -20 4.65919 60.1681   4
   0  18 -20 202.066 81.0144   6
   0 -18 -21 1842.77 171.134   5
   0  18 -21 2070.88 193.919   6
   0 -18  21 1841.36 218.095   2
   0 -18 -21 1752.70 182.418   4
   0 -18 -22-137.013 104.166   4
   0 -18 -22 85.7363 53.9930   5
   0  18 -22 80.7903 61.9860   6
   0 -18  22 71.7483 87.0770   2
   0 -18  23 321.156 112.730   2
   0 -18 -23-32.0789 81.6972   4
   0  18 -23 157.768 71.4458   6
   0 -18 -23 262.703 74.0968   5
   0  18 -24 348.195 95.5653   6
   0 -18 -24 334.334 91.0075   5
   0 -18  24 154.965 80.5142   2
   0 -18 -24 154.726 52.8754   4
   0 -18 -25 62.6796 59.8811   5
   0 -18 -25-20.7398 60.6797   4
   0 -18  25-61.1086 80.0353   2
   0 -18 -26-119.391 87.6345   4
   0 -18 -26 37.1935 53.8874   5
   0 -18  26 104.565 79.9016   2
   0 -18 -27 44.6766 66.2040   5
   0 -18 -27 60.6762 67.9196   4
   0 -18  27-1.53534 80.2406   2
   0 -18  28-36.8744 90.9818   2
   0 -18 -28 49.7626 57.9645   5
   0 -18 -28 64.0471 76.9588   4
   0 -18 -29 454.762 116.759   5
   0 -18 -29 539.799 128.225   4
   0 -18  29 432.662 139.632   2
   0 -18  30 149.847 114.965   2
   0 -18 -30 452.208 144.176   4
   0 -18 -30 222.218 101.948   5
   0 -18 -31 195.437 104.047   4
   0 -18  31 39.1679 78.2464   2
   0 -18  32 274.877 125.271   2
   0 -18 -32 449.315 134.086   4
   0 -18 -33 112.003 105.753   4
   0 -18  33 144.472 83.4875   2
   0  19   0 310.073 64.4652   2
   0  19   0 520.995 113.970   6
   0 -19   0 365.334 73.0186   2
   0  19   0 225.652 35.0159   5
   0  19   0 345.156 106.713   1
   0  19  -1 4359.88 131.547   5
   0  19  -1 4310.55 251.193   1
   0  19   1 4235.07 177.510   2
   0  19   1 4285.33 258.236   6
   0  19  -1 4356.10 253.367   6
   0  19  -1 4359.89 197.016   2
   0  19   1 4258.14 248.119   1
   0 -19  -1 4367.00 187.380   2
   0 -19   1 4312.57 201.568   2
   0  19   1 3888.35 104.636   5
   0  19   2 204.255 44.5616   2
   0  19   2 206.366 77.1623   1
   0  19   2 169.773 76.9780   6
   0 -19  -2 259.943 54.8013   2
   0  19  -2 169.862 37.4753   5
   0  19  -2 184.353 72.1180   1
   0 -19   2 293.748 69.4093   2
   0  19   2 125.367 18.8866   5
   0  19  -2 192.535 70.4894   6
   0  19  -2 176.581 56.4707   2
   0  19  -3 3187.42 210.909   1
   0  19   3 3128.49 221.442   6
   0  19  -3 3127.42 216.067   6
   0 -19   3 3269.10 190.205   2
   0 -19  -3 3413.57 148.091   2
   0  19   3 3502.71 226.400   1
   0  19  -3 3365.66 133.590   5
   0  19   3 3735.16 147.947   2
   0  19  -4 110.158 29.2071   5
   0  19   4 151.908 74.7414   6
   0  19  -4 93.9790 50.9455   6
   0 -19   4 84.2085 53.8586   2
   0  19   4 107.557 65.7836   1
   0 -19  -4 156.369 34.8118   2
   0  19   4 158.061 33.5436   2
   0  19  -4 74.9177 42.2093   1
   0  19   5 126.897 52.9682   6
   0  19   5 156.758 28.3466   2
   0  19   5 136.341 54.3638   1
   0  19  -5 132.935 60.0516   6
   0 -19   5 78.0966 42.3819   2
   0  19  -5 92.3137 39.8292   1
   0 -19  -5 190.396 33.2893   2
   0  19  -6 34.1949 40.7616   1
   0  19  -6 82.7819 51.4808   6
   0 -19  -6 68.8295 15.9888   5
   0 -19  -6 67.4867 18.7348   2
   0  19   6 75.2260 48.0562   1
   0  19   6 45.8627 50.1292   6
   0 -19   6 29.7153 36.2123   2
   0 -19   7 361.220 77.0085   2
   0 -19  -7 320.059 66.9695   3
   0  19   7 284.470 92.0575   6
   0 -19  -7 201.642 23.3044   2
   0  19  -7 173.313 77.0030   6
   0  19   7 382.938 96.8929   1
   0 -19  -7 250.240 29.2453   5
   0 -19   8 64.6367 66.0934   2
   0 -19  -8 67.7576 50.8730   3
   0  19  -8 26.0902 59.9785   6
   0 -19  -8-6.53245 19.8221   5
   0  19   8 271.076 94.7644   6
   0 -19  -9 1215.09 109.916   3
   0 -19   9 1104.65 141.295   2
   0  19  -9 992.611 134.994   6
   0 -19  -9 924.223 63.9988   5
   0 -19  10 1242.55 148.251   2
   0  19 -10 1532.74 158.018   6
   0 -19 -10 1764.99 130.685   3
   0 -19 -10 1503.44 89.0688   5
   0 -19 -11 289.563 51.8657   3
   0 -19  11 242.279 76.6941   2
   0 -19 -11 259.944 41.2502   5
   0  19 -11 277.000 73.6023   6
   0 -19 -12 188.233 50.7168   4
   0 -19  12 215.893 80.3089   2
   0 -19 -12 315.403 51.2704   3
   0  19 -12 286.611 76.9087   6
   0 -19 -12 337.598 50.5089   5
   0 -19 -13 2912.81 210.772   4
   0 -19 -13 3336.91 159.838   5
   0 -19 -13 3026.29 151.239   3
   0 -19  13 2956.71 232.708   2
   0  19 -13 3318.56 226.562   6
   0  19 -14 116.788 60.6117   6
   0 -19 -14 175.306 43.4898   5
   0 -19 -14 136.813 37.2922   3
   0 -19 -14 214.799 72.2948   4
   0 -19  14 143.532 69.5176   2
   0 -19 -15 299.150 56.8633   5
   0 -19 -15 155.811 60.3258   4
   0 -19 -15 216.964 43.1280   3
   0  19 -15 95.1333 60.9377   6
   0 -19  15 29.7647 51.9273   2
   0 -19 -16 12.5694 52.2946   4
   0  19 -16 92.3569 59.3141   6
   0 -19  16-101.472 69.9884   2
   0 -19 -16 65.8244 35.4110   5
   0 -19  17 919.587 149.342   2
   0  19 -17 1047.15 144.675   6
   0 -19 -17 1017.15 136.110   4
   0 -19 -17 1075.20 115.328   5
   0 -19 -18 455.314 107.019   4
   0 -19  18 175.016 81.9966   2
   0 -19 -18 475.396 82.6706   5
   0  19 -18 381.519 94.1616   6
   0 -19 -19 1194.71 159.438   4
   0 -19  19 873.818 142.770   2
   0  19 -19 1163.13 154.457   6
   0 -19 -19 1188.42 130.970   5
   0 -19 -20 177.281 75.5310   4
   0  19 -20 125.381 72.0604   6
   0 -19  20 114.234 73.0736   2
   0 -19 -20 229.109 67.9641   5
   0  19 -21 1527.42 178.827   6
   0 -19  21 1352.69 188.181   2
   0 -19 -21 1152.76 151.759   4
   0 -19 -21 1465.36 146.531   5
   0  19 -22 962.686 143.743   6
   0 -19  22 848.948 163.812   2
   0 -19 -22 677.692 109.289   4
   0 -19 -22 894.837 122.377   5
   0 -19  23 73.9157 75.5211   2
   0 -19 -23 18.7451 48.4370   5
   0 -19 -23-108.622 106.843   4
   0  19 -23-49.6028 60.7037   6
   0 -19 -24-24.6217 48.6224   5
   0 -19 -24-144.841 96.8443   4
   0  19 -24-23.3170 61.4909   6
   0 -19  24-241.737 109.016   2
   0 -19 -25 64.8290 52.0942   5
   0 -19  25 95.6591 68.0770   2
   0  19 -25 78.5203 64.9955   6
   0 -19 -25 40.1678 59.3684   4
   0  19 -26 734.741 131.818   6
   0 -19 -26 657.864 119.661   4
   0 -19  26 912.223 173.849   2
   0 -19 -26 737.536 128.587   5
   0  19 -27 19.0409 55.3390   6
   0 -19 -27-6.11072 49.8897   5
   0 -19  27-52.2214 88.8275   2
   0 -19 -27 6.63050 61.2013   4
   0 -19 -28 351.835 98.8888   4
   0 -19  28 395.169 126.622   2
   0 -19 -28 340.646 93.0626   5
   0  19 -28 501.553 124.861   6
   0 -19 -29-40.2318 70.2967   4
   0 -19  29 124.362 103.360   2
   0  19 -29 155.639 90.5351   6
   0 -19  30 112.137 79.5265   2
   0 -19 -30 369.342 123.959   4
   0  19 -30 109.941 76.7688   6
   0 -19  31 177.230 98.5782   2
   0 -19 -31 244.111 109.809   4
   0 -19 -32 374.381 148.312   4
   0 -19  32 172.811 113.019   2
   0 -20   0 4853.45 209.999   2
   0  20   0 5274.44 212.614   2
   0  20   0 4521.08 265.200   6
   0  20   0 4986.82 131.092   5
   0  20   0 5172.44 273.547   1
   0 -20   1 1172.98 110.845   2
   0  20  -1 1224.68 108.869   2
   0  20  -1 1050.72 65.5962   5
   0  20   1 1080.26 138.902   1
   0  20   1 1043.62 136.232   6
   0  20   1 1080.42 94.6555   2
   0  20   1 882.672 51.8852   5
   0  20  -1 1177.96 140.000   1
   0  20  -1 1082.68 137.878   6
   0 -20  -1 1036.53 97.2604   2
   0  20   2 2582.49 200.293   1
   0 -20  -2 2717.17 146.199   2
   0  20   2 2693.44 140.444   2
   0  20   2 2585.10 206.407   6
   0  20  -2 2434.36 193.773   1
   0 -20   2 2667.79 170.736   2
   0  20  -2 2862.50 171.291   2
   0  20  -2 2803.40 116.851   5
   0  20  -2 2912.20 212.895   6
   0  20  -3 7446.05 200.139   5
   0 -20   3 7592.31 290.723   2
   0  20   3 7537.25 340.791   1
   0 -20  -3 7629.61 227.187   2
   0  20   3 7353.43 345.175   6
   0  20   3 8207.07 224.872   2
   0  20  -3 7806.05 332.233   1
   0  20  -3 7702.22 341.507   6
   0  20   4 455.191 102.275   1
   0 -20   4 329.663 75.0086   2
   0  20   4 361.023 50.0688   2
   0  20  -4 402.074 82.9006   1
   0  20  -4 262.748 76.8120   6
   0  20   4 429.403 106.414   6
   0  20  -4 265.847 44.8895   5
   0 -20  -4 361.419 51.1947   2
   0  20  -5 443.927 94.0509   6
   0  20  -5 683.924 115.588   1
   0  20   5 495.767 50.8700   2
   0 -20  -5 590.074 60.0386   2
   0  20   5 552.069 115.395   6
   0  20   5 661.925 118.020   1
   0 -20   5 594.822 101.714   2
   0 -20  -6 80.0943 25.0234   2
   0 -20   6 145.880 64.3391   2
   0 -20  -6 94.1299 17.5797   5
   0  20   6 271.843 91.7373   1
   0  20  -6 169.031 76.5165   1
   0  20   6 166.455 75.2218   6
   0  20  -6 123.083 65.5590   6
   0  20   7 7960.85 357.689   1
   0  20  -7 8036.47 342.015   6
   0  20   7 7410.28 360.741   6
   0 -20  -7 6467.75 130.634   2
   0 -20  -7 6709.03 134.477   5
   0  20  -7 7993.50 328.645   1
   0 -20   7 7531.37 330.080   2
   0 -20   8 850.215 123.701   2
   0 -20  -8 831.733 97.9886   3
   0  20  -8 579.886 101.762   6
   0  20   8 1135.81 158.489   6
   0 -20  -8 608.037 46.2972   5
   0 -20  -9 5440.07 149.312   5
   0  20  -9 5491.01 287.225   6
   0 -20  -9 5867.08 245.571   3
   0 -20   9 5420.77 291.947   2
   0 -20 -10 835.459 92.3482   3
   0 -20  10 625.217 112.090   2
   0  20 -10 706.051 110.523   6
   0 -20 -10 652.103 57.9622   5
   0  20 -11 84.4718 58.6480   6
   0 -20 -11-0.26310 23.8118   5
   0 -20 -11 50.3681 37.2084   3
   0 -20  11-9.83634 47.5115   2
   0 -20 -12 573.920 61.9575   5
   0 -20  12 381.611 90.1165   2
   0  20 -12 651.924 113.848   6
   0 -20 -12 499.647 68.2442   3
   0 -20 -13 922.593 84.4273   5
   0  20 -13 987.418 134.170   6
   0 -20 -13 887.050 86.4854   3
   0 -20 -13 920.986 129.773   4
   0 -20  13 832.106 135.047   2
   0 -20 -14 1748.59 115.326   3
   0 -20 -14 1668.91 169.351   4
   0 -20  14 2003.10 203.310   2
   0 -20 -14 1747.85 121.029   5
   0  20 -14 1706.54 174.672   6
   0 -20  15 49.7131 57.3994   2
   0 -20 -15 58.9825 30.4054   5
   0  20 -15 291.861 83.9459   6
   0 -20 -15 133.547 64.6365   4
   0 -20 -16 1143.50 146.446   4
   0 -20 -16 1387.08 121.394   5
   0 -20  16 904.878 152.099   2
   0  20 -16 1134.45 145.706   6
   0 -20 -17 2299.47 159.189   5
   0  20 -17 1968.94 190.120   6
   0 -20  17 1882.79 207.476   2
   0 -20 -17 1875.49 185.550   4
   0 -20  18 9.76678 58.3040   2
   0 -20 -18 78.2649 45.0423   5
   0  20 -18-9.08714 50.3791   6
   0 -20 -18 22.2443 51.8523   4
   0 -20 -19 73.9842 42.4529   5
   0 -20  19 46.2999 65.1291   2
   0  20 -19-81.9922 73.6918   6
   0 -20 -19-57.5644 53.4243   4
   0 -20  20-63.0945 73.0726   2
   0 -20 -20 123.434 54.2181   5
   0 -20 -20 26.9286 51.8067   4
   0  20 -20 116.260 64.9214   6
   0  20 -21 528.365 112.179   6
   0 -20  21 469.130 123.863   2
   0 -20 -21 296.088 72.1539   5
   0 -20 -21 326.247 79.6989   4
   0 -20 -22 496.391 95.9958   5
   0  20 -22 532.825 110.486   6
   0 -20 -22 238.306 65.2003   4
   0 -20  22 492.691 133.861   2
   0 -20 -23 261.273 77.3781   4
   0  20 -23 501.820 110.281   6
   0 -20 -23 313.511 77.5369   5
   0 -20  23 345.802 113.646   2
   0 -20  24 8.78644 74.9537   2
   0  20 -24 37.2384 53.6324   6
   0 -20 -24 30.6605 74.0608   4
   0 -20 -24 112.102 54.2694   5
   0 -20  25 120.736 83.9454   2
   0 -20 -25 177.632 76.5336   5
   0 -20 -25-14.6917 89.5686   4
   0  20 -25 170.026 88.3071   6
   0 -20  26 205.646 94.6877   2
   0  20 -26 207.481 79.3141   6
   0 -20 -26 19.5070 72.3834   4
   0  20 -27-6.89029 51.0207   6
   0 -20  27-94.6548 98.4639   2
   0 -20 -27 30.4719 62.2273   4
   0 -20  28-0.26346 92.5954   2
   0  20 -28-8.83996 71.0013   6
   0 -20 -28-37.6513 73.5056   4
   0 -20  29 48.2069 73.4820   2
   0 -20 -29 71.1194 65.2468   4
   0  20 -29 34.4177 73.7824   6
   0 -20  30 28.1710 77.6385   2
   0 -20 -30 116.211 92.3311   4
   0 -20 -31 327.695 127.055   4
   0 -20  31 42.4075 89.6160   2
   0 -20  32 148.025 100.133   2
   0  21   0 108.188 24.4768   5
   0 -21   0 123.277 46.4381   2
   0  21   0 177.788 77.6699   1
   0  21   0 129.992 45.5886   2
   0  21   0 216.526 85.7393   6
   0  21   1 102.137 33.9455   2
   0  21   1 93.6809 19.3196   5
   0  21  -1 119.096 65.4765   6
   0  21  -1 68.8937 47.8069   1
   0  21  -1 157.492 27.8977   5
   0 -21   1 171.145 50.9551   2
   0  21   1 94.9436 49.1435   6
   0 -21  -1 174.929 46.1976   2
   0  21  -1 172.244 54.7832   2
   0  21   1 21.3242 51.6252   1
   0 -21  -2 3879.22 176.359   2
   0  21   2 4092.97 175.263   2
   0  21  -2 3780.99 238.663   1
   0  21   2 3663.47 250.792   6
   0  21   2 3909.23 250.768   1
   0  21  -2 3956.40 138.375   5
   0  21  -2 3966.54 251.096   6
   0 -21   2 3855.94 205.936   2
   0  21  -3 4902.86 269.956   1
   0  21  -3 4560.61 271.680   6
   0 -21  -3 4667.28 182.401   2
   0  21   3 4809.65 286.746   6
   0 -21   3 4958.81 240.795   2
   0  21   3 5056.00 182.567   2
   0  21   3 4757.68 279.258   1
   0  21  -3 4847.26 163.157   5
   0  21  -4 121.705 67.7886   6
   0 -21  -4 198.949 44.7783   2
   0  21   4 308.588 93.2995   1
   0  21   4 179.392 39.0711   2
   0  21  -4 287.072 86.3639   1
   0 -21   4 266.335 77.6353   2
   0  21  -4 211.254 46.8304   5
   0  21   4 184.984 79.2618   6
   0 -21  -5 12189.0 254.530   2
   0  21   5 12736.7 248.191   2
   0  21   5 11646.8 438.318   1
   0  21  -5 11631.4 409.060   1
   0  21  -5 11122.0 425.663   6
   0 -21   5 11850.3 393.815   2
   0  21  -5 12593.3 294.554   5
   0  21   5 11546.8 451.260   6
   0 -21   6 818.372 116.724   2
   0  21   6 1306.14 160.101   1
   0  21   6 813.520 145.070   6
   0  21  -6 793.098 113.807   1
   0 -21  -6 848.522 62.1148   2
   0  21  -6 618.379 110.968   6
   0 -21  -7 2092.06 70.9734   5
   0  21   7 2530.45 226.466   6
   0  21  -7 2687.72 218.670   6
   0  21   7 2753.67 226.043   1
   0  21  -7 2653.55 200.298   1
   0 -21   7 2376.42 193.721   2
   0 -21  -7 2285.65 82.9705   2
   0 -21  -8-31.1199 17.3346   5
   0  21  -8-45.8869 46.1443   6
   0  21   8 31.4435 67.7487   6
   0 -21   8-0.33269 51.3381   2
   0  21  -8-27.4116 44.7147   1
   0  21  -9 529.728 101.938   6
   0 -21   9 714.989 115.594   2
   0 -21  -9 576.036 48.0272   5
   0 -21 -10 182.970 32.3515   5
   0 -21  10 252.345 83.2310   2
   0 -21 -10 174.067 50.3054   3
   0  21 -10 163.192 70.5717   6
   0 -21 -11 318.514 41.3233   5
   0 -21 -11 437.244 71.9004   3
   0 -21  11 270.292 77.3945   2
   0  21 -11 347.121 81.7993   6
   0  21 -12 509.738 108.203   6
   0 -21 -12 570.841 76.6537   3
   0 -21 -12 504.959 57.2163   5
   0 -21  12 383.212 94.9871   2
   0 -21  13 315.312 84.9270   2
   0 -21 -13 489.449 68.5314   3
   0 -21 -13 380.925 52.1976   5
   0 -21 -13 353.601 77.6742   4
   0  21 -13 689.658 117.021   6
   0  21 -14 210.293 87.1465   6
   0 -21  14 259.478 99.1258   2
   0 -21 -14 141.038 39.8969   5
   0 -21 -14 70.5233 49.2526   4
   0 -21  15 3936.42 290.226   2
   0 -21 -15 3914.89 184.373   5
   0  21 -15 4213.29 272.527   6
   0 -21 -15 3825.16 263.861   4
   0 -21  16 362.166 100.646   2
   0 -21 -16 524.804 74.7790   5
   0  21 -16 663.672 120.559   6
   0 -21 -16 591.634 112.583   4
   0 -21 -17 113.893 44.8162   5
   0 -21 -17 132.860 74.3731   4
   0  21 -17 74.3799 67.9169   6
   0 -21  17 33.1635 60.2016   2
   0 -21 -18 433.001 78.0889   5
   0 -21  18 275.778 95.3175   2
   0 -21 -18 379.306 96.4170   4
   0  21 -18 193.640 79.1033   6
   0 -21  19 689.095 136.832   2
   0 -21 -19 790.211 102.364   5
   0  21 -19 710.920 120.269   6
   0 -21 -19 750.837 121.204   4
   0  21 -20 310.575 82.7860   6
   0 -21 -20 242.945 60.3224   5
   0 -21 -20 148.600 61.5809   4
   0 -21  20 276.970 94.8076   2
   0 -21  21 9.36535 84.7359   2
   0 -21 -21 55.2262 40.9350   5
   0  21 -21 22.3991 50.8166   6
   0 -21 -21 34.0133 56.4600   4
   0 -21 -22-139.329 96.4785   4
   0  21 -22 40.6185 54.6455   6
   0 -21 -22 15.4274 44.3089   5
   0 -21  22-98.6138 97.6176   2
   0  21 -23 113.717 73.8523   6
   0 -21  23 125.199 68.4902   2
   0 -21 -23 58.5136 63.5325   4
   0 -21 -23 200.941 80.5707   5
   0  21 -24 524.977 112.074   6
   0 -21 -24 290.885 89.7893   4
   0 -21  24 331.815 105.812   2
   0 -21 -25 59.6919 66.4741   4
   0  21 -25 194.118 83.3521   6
   0 -21  25 108.808 87.3976   2
   0 -21 -26-80.3258 96.7238   4
   0  21 -26 146.838 77.2518   6
   0 -21  26-206.116 115.838   2
   0  21 -27 536.582 122.486   6
   0 -21 -27 532.997 116.133   4
   0 -21  27 321.811 123.211   2
   0  21 -28-20.5128 54.8776   6
   0 -21  28-71.7239 95.7158   2
   0 -21 -28-138.874 98.0172   4
   0 -21  29-78.8188 79.8380   2
   0 -21 -29-95.1982 83.7949   4
   0  21 -29-63.1159 75.7934   6
   0 -21 -30 327.850 109.987   4
   0 -21  30 315.277 126.251   2
   0 -21 -31 484.596 146.711   4
   0 -21  31 41.2660 90.0079   2
   0  22   0 3470.63 108.678   5
   0  22   0 3621.70 185.731   2
   0 -22   0 3444.53 185.095   2
   0  22   0 3537.84 244.507   6
   0  22   0 3616.64 241.074   1
   0  22  -1 468.458 107.314   6
   0 -22  -1 363.697 66.4943   2
   0  22  -1 378.360 94.0013   1
   0  22   1 377.449 96.3777   6
   0  22   1 285.835 29.1616   5
   0  22  -1 342.877 40.4233   5
   0  22  -1 377.494 67.9305   2
   0  22   1 386.217 89.7956   1
   0 -22   1 326.808 64.8189   2
   0  22   1 343.569 59.8276   2
   0  22   2 66.6620 33.4110   2
   0  22   2 36.3950 11.6727   5
   0 -22   2 111.160 48.9324   2
   0  22  -2 49.6684 24.0218   5
   0  22  -2 86.6167 57.4253   6
   0 -22  -2 120.483 44.8607   2
   0  22  -2 91.4326 60.2700   1
   0  22   2 156.576 76.2663   6
   0  22   2 94.6822 63.6940   1
   0  22  -3 857.327 72.5610   5
   0  22  -3 867.029 126.480   1
   0  22   3 925.959 84.4706   2
   0 -22  -3 797.098 82.3249   2
   0  22   3 1093.21 148.540   1
   0  22  -3 810.487 129.650   6
   0 -22   3 800.591 106.212   2
   0  22   3 882.040 142.218   6
   0  22  -4 123.781 70.1976   1
   0  22   4 52.2091 54.3745   6
   0  22   4 12.5265 21.5130   2
   0  22   4 102.004 73.9223   1
   0 -22   4 40.9116 46.2953   2
   0 -22  -4 10.0004 26.5766   2
   0  22  -4-34.3308 48.4005   6
   0  22  -4 47.5373 27.3798   5
   0  22  -5 220.377 79.6846   6
   0  22   5 508.459 127.477   1
   0  22  -5 139.080 48.3533   5
   0 -22  -5 229.147 48.6641   2
   0  22   5 161.863 38.5333   2
   0  22   5 279.565 108.029   6
   0  22  -5 380.438 96.3805   1
   0 -22   5 351.758 85.1300   2
   0  22  -6 1251.36 149.600   6
   0 -22   6 1137.43 133.302   2
   0  22  -6 1200.18 140.526   1
   0  22   6 1198.96 150.674   1
   0 -22  -6 1100.62 72.9789   2
   0  22   6 1104.14 146.591   6
   0 -22  -7 381.781 36.5218   2
   0  22   7 411.220 98.9125   1
   0  22  -7 436.293 87.5136   1
   0  22   7 347.053 93.8360   6
   0 -22   7 385.439 86.3232   2
   0  22  -7 441.087 97.3844   6
   0  22   8-3.37469 62.6103   6
   0 -22   8-27.3778 46.8152   2
   0 -22  -8 4.74712 8.94913   5
   0  22  -8-19.9424 51.0646   1
   0  22  -8-27.7987 50.7457   6
   0 -22   9 519.683 108.091   2
   0  22  -9 557.135 109.877   6
   0 -22  -9 494.635 42.5175   5
   0  22  -9 617.605 107.298   1
   0 -22 -10 1208.15 71.7466   5
   0 -22  10 1133.75 139.660   2
   0  22 -10 1153.93 144.330   6
   0 -22 -11 1026.06 71.9044   5
   0  22 -11 906.945 128.135   6
   0 -22  11 902.313 137.040   2
   0  22 -12 32.6718 46.9132   6
   0 -22 -12-20.2842 29.5043   5
   0 -22  12 64.0934 58.1174   2
   0 -22 -12 58.6806 33.2924   3
   0 -22 -13-85.9528 79.4389   4
   0  22 -13-99.8474 68.7316   6
   0 -22  13-41.6465 66.4250   2
   0 -22 -13 12.5203 23.3931   5
   0 -22 -14 98.9861 45.3380   4
   0  22 -14 265.278 81.5305   6
   0 -22 -14 188.328 43.5171   5
   0 -22  14 237.959 92.4464   2
   0 -22 -15 52.5865 60.3833   4
   0  22 -15 89.8673 66.1427   6
   0 -22  15 43.8087 65.5497   2
   0 -22 -15 59.9802 31.6106   5
   0  22 -16 1506.76 172.848   6
   0 -22  16 1334.82 179.543   2
   0 -22 -16 1363.21 112.870   5
   0 -22 -16 1040.76 146.641   4
   0 -22 -17 2344.20 156.628   5
   0 -22 -17 2437.38 220.689   4
   0  22 -17 2472.05 224.952   6
   0 -22  17 2284.34 234.306   2
   0 -22 -18 1154.76 118.486   5
   0  22 -18 1115.22 162.056   6
   0 -22 -18 998.026 146.580   4
   0 -22  18 839.828 160.243   2
   0 -22 -19 582.918 92.7876   5
   0 -22 -19 467.206 121.381   4
   0  22 -19 621.656 129.381   6
   0 -22  19 707.475 148.080   2
   0 -22 -20 790.754 136.533   4
   0 -22  20 654.861 146.441   2
   0  22 -20 916.399 143.127   6
   0 -22  21-24.3601 91.3228   2
   0  22 -21 112.132 74.1267   6
   0 -22 -21 92.0269 60.5292   4
   0 -22 -22 51.9277 64.2160   4
   0  22 -22 84.1592 67.6317   6
   0 -22  22-16.7283 77.4822   2
   0  22 -23 836.827 148.010   6
   0 -22 -23 764.357 138.190   4
   0 -22  23 854.835 167.544   2
   0 -22 -24-121.527 92.6105   4
   0  22 -24-57.0669 63.6950   6
   0 -22  24-79.6630 93.6421   2
   0  22 -25 117.698 74.3288   6
   0 -22  25-8.48629 88.2664   2
   0 -22 -25 27.8892 79.4915   4
   0  22 -26-16.0061 59.2244   6
   0 -22 -26-95.4851 100.999   4
   0 -22  26-98.8843 95.4680   2
   0 -22 -27-3.28586 78.3923   4
   0  22 -27 88.4076 79.6452   6
   0 -22  27 91.1158 95.9533   2
   0 -22 -28 114.707 78.8279   4
   0  22 -28 406.213 112.678   6
   0 -22  28 376.588 145.896   2
   0 -22 -29 379.535 115.697   4
   0 -22  29 534.018 161.820   2
   0  22 -29 741.682 146.999   6
   0 -22  30 691.401 179.307   2
   0 -22 -30 451.109 124.914   4
   0  23   0 154.530 74.9516   6
   0  23   0 50.9492 41.9609   2
   0 -23   0 129.208 53.9188   2
   0  23   0 54.7149 17.2652   5
   0  23   0 103.382 65.0544   1
   0 -23  -1 2173.56 148.997   2
   0  23   1 2141.11 198.332   1
   0 -23   1 1993.79 154.149   2
   0  23   1 2165.62 142.182   2
   0  23   1 1852.42 189.580   6
   0  23  -1 2064.57 196.508   6
   0  23  -1 2074.92 93.7613   5
   0  23  -1 2050.42 193.598   1
   0  23   1 1664.11 66.2568   5
   0  23  -2 90.9094 27.0377   5
   0  23   2 51.8366 70.3488   1
   0 -23  -2-6.37581 31.4503   2
   0 -23   2 64.3358 42.9319   2
   0  23   2 17.6698 60.7255   6
   0  23  -2 11.3457 57.6208   6
   0  23   2 93.6742 38.5319   2
   0  23  -2 61.8476 63.2753   1
   0 -23   3 5179.03 256.794   2
   0  23   3 5293.93 197.426   2
   0  23  -3 4497.52 276.644   1
   0 -23  -3 5131.73 204.195   2
   0  23   3 4914.19 298.254   1
   0  23  -3 4682.72 290.696   6
   0  23  -3 4958.95 167.043   5
   0  23   3 4875.05 302.624   6
   0  23  -4 1937.68 185.738   1
   0  23  -4 1912.41 191.347   6
   0  23  -4 2099.35 117.520   5
   0  23   4 2233.94 122.878   2
   0  23   4 1960.37 206.222   6
   0 -23  -4 2184.84 127.632   2
   0  23   4 2141.59 202.592   1
   0 -23   4 1979.81 170.985   2
   0  23  -5 1369.20 99.4679   5
   0  23   5 1485.60 168.490   1
   0 -23   5 1314.48 140.385   2
   0  23   5 1423.47 90.3342   2
   0  23  -5 1286.17 150.048   1
   0  23  -5 1129.85 144.554   6
   0  23   5 1287.43 164.735   6
   0 -23  -5 1296.82 89.0128   2
   0 -23  -6 43.3973 21.1648   2
   0  23   6 130.579 75.6140   6
   0  23  -6 90.7716 62.3181   6
   0  23  -6 108.772 55.9584   1
   0  23  -6 24.0774 25.2630   5
   0 -23   6 80.4143 43.4017   2
   0  23   6-9.40630 52.9441   1
   0 -23  -7 153.075 26.5814   2
   0  23  -7 139.047 57.7824   1
   0  23   7 291.954 88.9664   1
   0  23   7 178.360 71.7450   6
   0 -23   7 114.796 55.4309   2
   0  23  -7 60.1335 51.0703   6
   0 -23  -8 923.333 43.1493   5
   0  23  -8 1216.86 144.035   1
   0  23  -8 1172.71 150.205   6
   0 -23   8 960.861 131.688   2
   0  23   8 994.696 149.833   6
   0 -23  -9 9.95585 10.1923   5
   0  23  -9 23.1865 43.2921   1
   0  23  -9 68.4867 60.1364   6
   0 -23   9-22.6998 53.9071   2
   0 -23 -10-6.80000 13.9460   5
   0 -23  10 23.6237 48.8189   2
   0  23 -10-18.0720 48.9843   6
   0  23 -11 725.416 123.436   6
   0 -23  11 653.869 118.907   2
   0 -23 -11 713.291 58.5920   5
   0 -23 -12 271.871 39.2891   5
   0 -23  12 316.160 88.8437   2
   0  23 -12 201.482 74.5420   6
   0 -23 -13 487.174 100.617   4
   0  23 -13 815.371 132.573   6
   0 -23  13 586.336 115.236   2
   0 -23 -13 721.862 67.4572   5
   0 -23 -14 149.708 49.9447   4
   0 -23  14 326.366 91.7088   2
   0 -23 -14 315.264 49.0043   5
   0  23 -14 299.317 88.0946   6
   0  23 -15 88.2007 65.1382   6
   0 -23 -15-10.7162 65.2019   4
   0 -23 -15 36.8672 25.4198   5
   0 -23  15-43.5701 71.1850   2
   0 -23 -16 24.9542 57.4409   4
   0  23 -16 44.0608 72.4313   6
   0 -23  16 2.10444 63.0214   2
   0  23 -17 3557.73 274.369   6
   0 -23 -17 3316.99 262.079   4
   0 -23  17 3034.07 279.384   2
   0  23 -18 3617.54 272.199   6
   0 -23 -18 2965.63 254.369   4
   0 -23  18 3318.87 291.181   2
   0  23 -19 1176.62 171.073   6
   0 -23 -19 995.813 151.886   4
   0 -23  19 1056.91 175.527   2
   0 -23 -20 351.806 97.1150   4
   0 -23  20 291.074 104.707   2
   0  23 -20 421.786 119.557   6
   0  23 -21 369.317 99.2313   6
   0 -23 -21 309.658 94.5467   4
   0 -23  21 222.719 84.2853   2
   0 -23  22 180.530 86.8224   2
   0  23 -22 289.973 91.3445   6
   0 -23 -22 326.039 96.1821   4
   0 -23 -23-16.3504 54.3755   4
   0 -23  23-27.0407 77.1926   2
   0  23 -23 107.888 80.7793   6
   0  23 -24 325.684 98.3159   6
   0 -23  24 207.415 104.580   2
   0 -23 -24 126.785 79.6814   4
   0  23 -25-25.7087 60.7200   6
   0 -23 -25 13.9321 63.3365   4
   0 -23  25-108.528 99.8849   2
   0  23 -26 83.1960 94.8006   6
   0 -23 -26-93.2749 93.1953   4
   0 -23  26 168.004 112.570   2
   0 -23  27 316.051 122.624   2
   0  23 -27 189.000 81.2995   6
   0 -23 -27 199.439 83.4835   4
   0 -23  28 546.868 157.549   2
   0 -23 -28 365.165 108.263   4
   0  23 -28 563.511 132.891   6
   0 -23 -29 314.001 114.298   4
   0 -23  29 604.226 171.625   2
   0 -23  30 414.063 151.068   2
   0 -23 -30 368.466 112.023   4
   0  24   0 18.6647 50.0103   6
   0  24   0 89.6878 73.4357   1
   0 -24   0 83.4055 48.5721   2
   0  24   0 78.4851 19.7344   5
   0  24  -1 3178.28 251.040   6
   0  24  -1 3390.63 119.577   5
   0  24   1 3799.94 189.068   2
   0  24   1 3352.56 255.402   6
   0 -24  -1 3499.06 190.666   2
   0  24   1 3448.74 251.332   1
   0 -24   1 3648.25 210.357   2
   0  24  -1 3309.58 243.349   1
   0  24  -2 686.103 115.529   1
   0 -24  -2 748.344 88.5053   2
   0  24   2 754.876 85.3812   2
   0  24   2 699.181 122.627   6
   0  24   2 627.461 115.211   1
   0  24  -2 645.472 57.8420   5
   0 -24   2 674.424 96.8150   2
   0  24  -2 756.002 133.939   6
   0  24  -3 302.551 82.4189   1
   0  24  -3 274.361 45.1147   5
   0  24   3 436.699 64.4419   2
   0  24   3 274.960 87.1541   1
   0 -24   3 281.298 73.4246   2
   0  24   3 375.624 104.014   6
   0 -24  -3 271.826 55.6787   2
   0  24  -3 357.481 98.9688   6
   0  24  -4 1263.78 153.912   1
   0  24   4 1361.64 98.9450   2
   0  24   4 1359.31 164.903   1
   0  24   4 1498.66 179.639   6
   0 -24   4 1425.09 148.765   2
   0  24  -4 1229.53 158.709   6
   0 -24  -4 1374.99 103.700   2
   0  24  -4 1410.53 97.9075   5
   0  24   5-81.0165 70.0960   6
   0  24  -5 115.803 65.3363   1
   0 -24   5-3.07470 53.3785   2
   0  24   5 43.0840 59.4893   1
   0  24  -5-0.63958 53.8442   6
   0  24  -5 8.90206 23.3066   5
   0 -24  -5 61.3473 28.5135   2
   0 -24   6-29.4861 50.1351   2
   0  24  -6-45.6475 68.0274   6
   0  24  -6-14.8309 47.1544   1
   0  24   6-165.370 82.0401   6
   0  24  -6-51.6984 36.3999   5
   0  24   6-31.9973 51.6216   1
   0 -24  -6 7.87656 17.6883   2
   0 -24   7 196.058 63.1808   2
   0 -24  -7 235.172 32.9561   2
   0  24  -7 374.452 95.1363   1
   0  24   7 181.590 71.1802   1
   0  24   7 127.353 64.0903   6
   0  24  -7 292.685 88.6550   6
   0  24  -7 246.584 48.8929   5
   0 -24   8 871.879 125.910   2
   0  24  -8 733.150 125.901   6
   0  24   8 702.331 134.477   6
   0  24  -8 829.949 128.992   1
   0 -24  -9 147.724 20.4313   5
   0 -24   9 126.950 72.4618   2
   0  24  -9 171.264 68.4329   1
   0  24  -9 161.728 71.6552   6
   0  24 -10 392.769 90.0980   1
   0 -24  10 309.159 90.6093   2
   0 -24 -10 265.430 29.1804   5
   0  24 -10 217.689 76.0774   6
   0  24 -11 148.453 62.0602   1
   0 -24  11 22.6590 56.3880   2
   0  24 -11 90.9228 66.9158   6
   0  24 -12 310.505 96.1537   6
   0 -24  12 196.717 84.6176   2
   0  24 -13 1163.73 155.716   6
   0 -24  13 953.499 147.515   2
   0  24 -14 90.4743 59.5639   6
   0 -24  14 65.9925 66.6437   2
   0 -24 -14-210.449 76.9372   4
   0  24 -15 594.831 112.365   6
   0 -24  15 477.874 114.861   2
   0 -24 -15 378.855 83.6614   4
   0 -24 -16 2118.52 213.157   4
   0  24 -16 2684.82 237.831   6
   0 -24  16 2291.85 240.060   2
   0 -24  17 135.608 91.1593   2
   0 -24 -17 169.859 95.9973   4
   0  24 -17 24.8828 87.3925   6
   0 -24 -18 125.359 87.2783   4
   0 -24  18 134.378 96.5134   2
   0  24 -18 128.566 75.5882   6
   0 -24 -19 913.628 147.602   4
   0  24 -19 1110.59 169.551   6
   0 -24  19 666.281 145.157   2
   0  24 -20 1178.98 171.179   6
   0 -24 -20 997.381 154.533   4
   0 -24  20 910.517 158.441   2
   0 -24  21-101.409 90.4156   2
   0 -24 -21 36.8827 66.3152   4
   0  24 -21 49.5120 59.8605   6
   0 -24 -22 1657.44 203.854   4
   0  24 -22 1956.88 211.560   6
   0 -24  22 1870.79 243.981   2
   0  24 -23 227.772 98.5211   6
   0 -24  23 290.622 102.980   2
   0 -24 -23 243.486 85.3754   4
   0 -24  24 1282.89 213.124   2
   0 -24 -24 1169.82 176.315   4
   0  24 -24 1509.58 198.221   6
   0  24 -25 1142.32 172.638   6
   0 -24  25 1030.86 197.037   2
   0 -24 -25 825.063 154.780   4
   0 -24 -26 23.3871 79.1922   4
   0  24 -26 170.347 89.9856   6
   0 -24  26 123.509 101.302   2
   0 -24  27 548.070 163.423   2
   0  24 -27 245.185 97.1993   6
   0 -24 -27 377.575 93.7747   4
   0 -24 -28-186.679 115.447   4
   0 -24  28 128.288 123.463   2
   0  24 -28-50.4080 69.8935   6
   0 -24 -29-69.1075 72.0959   4
   0 -24  29 274.065 130.128   2
   0  25   0 22.8785 14.9881   5
   0  25   0-127.653 73.2922   6
   0  25   0 52.8352 67.3915   1
   0 -25   0 23.6820 35.0034   2
   0  25   1 105.662 17.8647   5
   0  25   1 219.058 84.8804   6
   0  25  -1 260.280 96.8472   1
   0 -25  -1 228.288 64.4331   2
   0  25   1 224.912 60.8699   2
   0 -25   1 148.418 66.0564   2
   0  25   1 358.415 105.872   1
   0  25  -1 269.418 96.7152   6
   0  25  -1 194.689 34.1977   5
   0  25   2 170.492 45.7910   2
   0  25   2 104.931 60.0571   1
   0 -25   2 193.375 64.1551   2
   0  25   2 214.907 79.8625   6
   0  25  -2 158.597 29.6506   5
   0 -25  -2 205.489 55.5222   2
   0  25  -2 267.927 88.2751   1
   0  25  -2 170.345 67.4681   6
   0  25   3-2.26321 50.2425   6
   0 -25   3 39.3050 38.5534   2
   0  25  -3 28.0441 55.2696   6
   0 -25  -3 11.8756 26.7596   2
   0  25   3 4.00797 26.4861   2
   0  25  -3-21.7206 26.2076   5
   0  25   3 53.9862 60.0119   1
   0  25  -3 15.4502 47.6143   1
   0  25   4 2464.66 134.308   2
   0  25  -4 2206.61 204.748   1
   0 -25   4 2339.03 188.371   2
   0  25   4 2167.08 206.984   1
   0  25   4 2351.43 222.757   6
   0  25  -4 2262.83 122.873   5
   0  25  -4 2128.12 207.648   6
   0 -25  -4 2244.18 136.031   2
   0 -25  -5 297.750 52.2756   2
   0  25  -5 208.729 78.0525   6
   0  25   5 256.282 89.2068   6
   0  25   5 170.605 90.4951   1
   0 -25   5 183.440 65.4867   2
   0  25  -5 265.698 86.8138   1
   0  25  -5 259.794 50.1166   5
   0  25   6 310.157 90.3860   1
   0  25  -6 246.395 54.6699   5
   0  25  -6 205.439 74.5472   6
   0  25  -6 269.087 87.2812   1
   0 -25  -6 231.564 37.7346   2
   0  25   6 152.952 74.4605   6
   0 -25   6 226.442 73.4712   2
   0  25  -7 859.990 139.905   6
   0 -25  -7 759.623 58.0817   2
   0  25   7 910.190 152.345   6
   0  25   7 1006.73 153.809   1
   0  25  -7 837.861 90.4687   5
   0 -25   7 782.953 122.273   2
   0  25  -7 754.120 123.458   1
   0  25   8 205.536 79.2282   6
   0  25  -8 158.144 71.3906   6
   0 -25   8 153.496 73.2414   2
   0  25  -8 121.877 73.6687   1
   0  25  -9 267.323 95.9275   1
   0  25  -9 221.756 74.5442   6
   0 -25   9 406.800 96.2839   2
   0 -25  10-38.8320 65.8784   2
   0  25 -10-28.2026 55.4338   6
   0  25 -10-10.7454 50.6633   1
   0  25 -11 188.632 80.1559   6
   0 -25  11 191.995 76.7228   2
   0  25 -11 203.951 81.9950   1
   0  25 -12 644.193 123.318   6
   0  25 -12 652.867 123.412   1
   0 -25  12 554.474 118.326   2
   0  25 -13 290.574 90.3505   6
   0 -25  13 183.167 80.9780   2
   0 -25  14 600.261 127.290   2
   0 -25 -14 574.657 114.987   4
   0  25 -14 560.868 117.926   6
   0  25 -15 344.243 106.385   6
   0 -25  15 452.129 123.878   2
   0 -25 -15 449.002 103.513   4
   0 -25 -16 2054.01 210.758   4
   0 -25  16 2394.30 249.465   2
   0  25 -16 1971.00 212.398   6
   0 -25 -17 534.862 115.403   4
   0 -25  17 618.806 141.363   2
   0  25 -17 759.584 138.691   6
   0 -25 -18 15.5669 70.5477   4
   0  25 -18-7.33172 56.7919   6
   0 -25  18 52.5560 70.3554   2
   0 -25 -19 322.067 93.5050   4
   0 -25  19 419.579 107.917   2
   0  25 -19 497.827 115.034   6
   0  25 -20 731.064 136.359   6
   0 -25 -20 638.603 133.597   4
   0 -25  20 532.040 133.318   2
   0 -25  21 146.459 88.4859   2
   0 -25 -21 158.970 80.1463   4
   0  25 -21 336.801 110.856   6
   0 -25 -22 850.778 153.072   4
   0  25 -22 929.424 156.620   6
   0 -25  22 802.921 172.657   2
   0  25 -23 318.882 103.283   6
   0 -25 -23 263.400 99.6156   4
   0 -25  23 189.073 92.5532   2
   0  25 -24 210.950 94.7782   6
   0 -25 -24 231.772 90.9217   4
   0 -25  24 409.476 145.710   2
   0  25 -25 498.617 125.710   6
   0 -25  25 443.392 145.664   2
   0 -25 -25 310.986 102.848   4
   0 -25 -26 6.56905 81.4085   4
   0  25 -26 149.334 102.644   6
   0 -25  27 45.7980 102.389   2
   0 -25 -27-117.429 118.830   4
   0  25 -27 89.1325 74.8206   6
   0 -25 -28-233.995 135.340   4
   0 -25  28-105.975 88.0232   2
   0 -25 -29 216.172 100.684   4
   0 -26   0 366.207 78.4403   2
   0  26   0 228.083 28.7196   5
   0  26   0 551.719 125.521   1
   0  26   0 338.402 104.440   6
   0 -26  -1 5539.10 250.135   2
   0  26  -1 4960.39 142.343   5
   0  26  -1 5362.54 325.047   1
   0  26   1 4822.91 317.695   6
   0 -26   1 5287.63 261.405   2
   0  26  -1 4916.12 319.491   6
   0  26   1 5219.27 324.575   1
   0  26   2 26.0949 55.2277   1
   0 -26  -2 103.801 47.9712   2
   0  26  -2 149.423 80.0593   1
   0  26  -2 121.765 74.6780   6
   0 -26   2 163.091 62.6099   2
   0  26  -2 90.9978 25.9165   5
   0  26   2 117.214 40.4398   2
   0  26   2 41.2934 62.5305   6
   0  26   3 286.561 52.7672   2
   0  26  -3 231.058 38.4056   5
   0  26   3 154.082 73.4537   1
   0  26  -3 197.394 63.7836   1
   0 -26   3 263.835 74.2575   2
   0  26  -3 218.923 73.2759   6
   0  26   3 321.212 103.955   6
   0 -26  -3 313.329 63.2029   2
   0 -26   4 16.3075 46.0308   2
   0  26  -4 95.7608 75.1114   6
   0 -26  -4 100.990 42.2084   2
   0  26   4 102.764 38.6484   2
   0  26   4 68.2589 61.2919   6
   0  26   4 193.000 77.4617   1
   0  26  -4 44.1926 23.9514   5
   0  26  -4 104.561 67.0728   1
   0  26  -5 990.448 143.793   6
   0  26   5 1278.78 165.288   1
   0  26  -5 1235.01 160.243   1
   0  26  -5 1223.59 96.3477   5
   0 -26  -5 1196.56 94.1208   2
   0 -26   5 1206.59 143.630   2
   0  26   5 1305.64 177.679   6
   0  26   6 1668.83 198.168   1
   0  26  -6 1426.56 166.841   1
   0 -26  -6 1425.13 93.6673   2
   0  26  -6 1329.77 105.655   5
   0  26   6 1456.69 188.378   6
   0 -26   6 1654.13 173.744   2
   0  26  -6 1280.66 170.482   6
   0  26  -7 1443.08 181.379   6
   0 -26   7 1594.13 176.027   2
   0  26  -7 1456.45 178.637   1
   0  26   7 1508.92 185.200   1
   0  26  -7 1453.33 118.349   5
   0  26   7 1440.85 192.295   6
   0  26  -8 1535.71 173.549   1
   0  26   8 1449.24 190.889   6
   0  26  -8 1206.49 167.197   6
   0 -26   8 1647.69 180.159   2
   0 -26   9 817.115 137.428   2
   0  26  -9 518.616 111.956   6
   0  26  -9 719.652 126.095   1
   0  26 -10 200.199 81.6554   6
   0 -26  10 105.219 67.4226   2
   0  26 -10 141.640 77.1791   1
   0 -26  11 838.775 144.460   2
   0  26 -11 803.295 134.044   1
   0  26 -11 740.146 132.538   6
   0  26 -12 1927.41 207.773   6
   0  26 -12 2091.93 197.751   1
   0 -26  12 1851.32 203.453   2
   0  26 -13 211.095 113.552   6
   0 -26  13 343.357 111.424   2
   0  26 -13 76.1576 80.1676   1
   0  26 -14 4313.56 301.678   6
   0 -26  14 3853.87 302.162   2
   0 -26 -14 3678.65 276.737   4
   0  26 -15 158.837 80.0504   6
   0 -26  15 157.058 79.2154   2
   0 -26 -15 61.8772 54.3287   4
   0 -26  16-31.0471 72.5514   2
   0  26 -16 82.4755 66.9206   6
   0 -26 -16 54.8329 56.2808   4
   0 -26  17-26.2077 64.1098   2
   0  26 -17-1.11787 63.4110   6
   0 -26 -17-67.5674 56.1654   4
   0 -26 -18 2.36828 50.8321   4
   0 -26  18-36.6393 77.6801   2
   0  26 -18 39.2520 62.2721   6
   0  26 -19 142.627 74.4755   6
   0 -26 -19 91.8812 59.5482   4
   0 -26  19 78.8521 83.5267   2
   0 -26  20 102.960 82.0370   2
   0  26 -20 36.9862 62.6134   6
   0 -26 -20 119.593 67.0849   4
   0  26 -21-33.8726 60.5980   6
   0 -26  21 81.5040 93.3386   2
   0 -26 -21 72.8910 74.3615   4
   0 -26 -22 5.43298 58.1235   4
   0  26 -22 294.030 101.003   6
   0 -26  22 128.045 114.523   2
   0  26 -23 161.850 86.5902   6
   0 -26  23 80.6887 101.433   2
   0 -26 -23 66.3957 81.7422   4
   0 -26 -24 290.251 102.391   4
   0 -26  24 305.669 119.892   2
   0  26 -24 364.447 108.573   6
   0  26 -25 135.192 88.2909   6
   0 -26  25 146.214 118.404   2
   0 -26 -25-97.6309 102.585   4
   0 -26  26 1043.77 205.021   2
   0  26 -26 1212.33 188.115   6
   0 -26 -26 1050.75 169.790   4
   0 -26 -27-48.8815 90.2314   4
   0  26 -27-35.7539 69.4048   6
   0 -26  27-60.2187 80.5367   2
   0 -26 -28-111.470 124.976   4
   0 -26  28-164.431 109.813   2
   0  27   0-51.5262 74.0026   6
   0  27   0-3.53948 9.02962   5
   0  27   0 12.2048 57.8882   1
   0 -27   0 12.9514 34.3049   2
   0  27   1 405.799 106.133   6
   0  27  -1 493.432 111.130   6
   0  27  -1 490.829 46.4082   5
   0  27  -1 623.306 126.704   1
   0 -27  -1 503.761 83.2306   2
   0 -27   1 560.970 92.4195   2
   0  27   1 544.294 123.420   1
   0 -27  -2 1094.65 111.252   2
   0  27  -2 1089.89 155.767   1
   0  27   2 959.368 97.6348   2
   0 -27   2 1009.36 128.012   2
   0  27   2 883.217 141.706   1
   0  27  -2 939.488 68.8779   5
   0  27  -2 759.698 134.597   6
   0  27   2 956.062 159.014   6
   0  27   3 157.487 78.7282   1
   0  27  -3 102.985 73.5745   6
   0 -27   3 66.1435 49.9580   2
   0  27  -3 76.0338 30.5867   5
   0  27   3 72.6383 73.7760   6
   0  27   3 93.4760 39.1965   2
   0 -27  -3 147.619 53.1376   2
   0  27  -3 127.997 71.8264   1
   0  27  -4 61.7005 61.5211   1
   0  27   4 10.5787 60.1524   6
   0 -27   4 16.1298 44.2964   2
   0  27   4 6.00931 58.2677   1
   0  27   4-10.7179 28.8696   2
   0 -27  -4 14.2774 28.0408   2
   0  27  -4-27.1528 30.9817   5
   0  27  -4 35.4491 57.4427   6
   0  27   5 81.2335 79.0209   6
   0  27  -5 89.3656 36.7015   5
   0  27  -5-53.7418 69.4257   6
   0  27  -5 88.4444 87.8471   1
   0 -27   5 81.8691 59.6748   2
   0  27   5 79.5604 69.2421   1
   0 -27  -5 115.512 41.6986   2
   0  27   6 244.224 94.0594   6
   0 -27   6 237.910 78.1387   2
   0  27  -6 205.842 44.0709   5
   0  27  -6 350.365 106.662   6
   0  27  -6 404.891 107.004   1
   0  27   6 264.009 97.1545   1
   0  27  -7 239.829 97.2746   6
   0  27   7 74.2533 75.8919   6
   0  27  -7 183.024 93.5910   1
   0  27   7 213.688 96.9934   1
   0 -27   7 211.029 81.5212   2
   0  27  -8 1540.69 178.730   1
   0 -27   8 1486.77 178.281   2
   0  27   8 1499.82 199.700   6
   0  27  -8 1390.75 179.207   6
   0  27  -9 66.3243 69.1408   1
   0 -27   9 273.926 91.9167   2
   0  27  -9 113.161 77.5744   6
   0  27 -10 25.8477 57.3140   6
   0  27 -10 39.4763 60.9712   1
   0 -27  10-16.0511 56.4827   2
   0 -27  11 1198.16 165.074   2
   0  27 -11 1262.47 165.368   1
   0  27 -11 1262.03 177.140   6
   0 -27  12 306.402 112.126   2
   0  27 -12 161.183 84.1135   1
   0  27 -12 321.995 104.270   6
   0  27 -13 1946.36 202.127   1
   0 -27  13 2034.57 223.478   2
   0  27 -13 2078.14 220.436   6
   0  27 -14-49.0400 55.3192   1
   0 -27 -14-97.0614 74.2151   4
   0 -27  14 171.699 90.7441   2
   0  27 -14 146.134 87.4164   6
   0  27 -15 10.4889 53.1381   1
   0 -27  15 69.5824 76.2713   2
   0 -27 -15-17.2395 64.3265   4
   0  27 -15 121.382 83.8974   6
   0 -27 -16-26.6652 69.9209   4
   0 -27  16 27.5196 66.8011   2
   0  27 -16 86.8004 66.7696   6
   0 -27  17 250.542 94.2945   2
   0 -27 -17 373.065 96.4424   4
   0  27 -17 399.185 110.902   6
   0 -27  18 341.477 104.863   2
   0 -27 -18 511.745 117.843   4
   0  27 -18 423.146 105.040   6
   0 -27 -19-55.2725 65.2092   4
   0  27 -19 43.4275 66.4729   6
   0 -27  19-3.70658 71.4863   2
   0 -27 -20 57.6857 64.0391   4
   0  27 -20-39.5823 61.1007   6
   0 -27  20 35.7788 84.7746   2
   0 -27 -21 275.037 99.1555   4
   0  27 -21 290.517 99.0079   6
   0 -27  21 249.885 100.393   2
   0  27 -22-1.77550 77.0680   6
   0 -27 -22 78.0805 65.0428   4
   0 -27  22-20.8484 86.3523   2
   0 -27 -23 968.008 171.914   4
   0  27 -23 814.292 155.470   6
   0 -27  23 697.757 168.289   2
   0 -27  24 348.565 132.346   2
   0  27 -24 393.097 118.272   6
   0 -27 -24 79.8452 63.3872   4
   0 -27  25 264.935 125.076   2
   0  27 -25 147.551 89.1784   6
   0 -27 -25-111.863 104.744   4
   0  27 -26 176.702 92.3105   6
   0 -27 -26-203.431 115.086   4
   0 -27  26 83.3277 93.7552   2
   0 -27 -27 125.797 64.4463   4
   0 -27  27 153.044 106.746   2
   0  28   0 300.074 96.3504   6
   0 -28   0 200.351 63.5120   2
   0  28   0 266.096 97.5976   1
   0 -28   1 163.014 55.8739   2
   0  28  -1 231.073 89.7468   6
   0  28   1 216.584 83.3260   6
   0  28   1 238.347 88.3111   1
   0  28  -1 215.223 78.8762   1
   0 -28  -1 210.928 62.2170   2
   0  28   2 31.0657 62.3741   1
   0 -28   2 10.9643 41.5504   2
   0  28  -2 9.65758 54.8988   6
   0  28   2-81.0099 69.8834   6
   0 -28  -2 25.9081 43.4121   2
   0  28  -2-49.6198 72.4230   1
   0 -28  -3 527.844 80.8190   2
   0  28   3 301.321 96.0964   1
   0  28  -3 540.180 118.139   6
   0  28  -3 599.313 119.150   1
   0 -28   3 463.907 87.6579   2
   0  28   3 267.152 95.1847   6
   0  28   4 4.22670 64.2532   1
   0 -28  -4 32.3974 28.6130   2
   0  28   4 40.6265 73.3910   6
   0  28  -4-16.9304 68.3342   6
   0  28  -4 136.756 75.5464   1
   0 -28   4 18.6527 58.7927   2
   0  28   5 543.865 128.657   1
   0  28  -5 583.983 132.406   6
   0  28  -5 567.193 123.886   1
   0 -28   5 310.891 82.8773   2
   0  28   5 543.430 129.280   6
   0  28  -6 1066.91 166.999   6
   0  28   6 1160.09 180.380   6
   0 -28   6 1437.06 166.441   2
   0  28   6 1093.20 170.624   1
   0  28  -6 1349.49 175.196   1
   0 -28   7 2056.79 200.998   2
   0  28   7 1497.07 204.682   6
   0  28   7 1874.31 213.793   1
   0  28  -7 1823.55 195.667   1
   0  28  -7 2040.38 218.407   6
   0  28   8 207.647 94.7834   6
   0  28  -8 195.344 98.9336   1
   0  28  -8 123.943 67.6239   6
   0 -28   8 315.940 93.2834   2
   0  28  -9 1706.35 195.751   1
   0  28  -9 1594.70 202.279   6
   0 -28   9 1818.17 199.738   2
   0  28 -10 1614.79 196.325   6
   0 -28  10 1746.45 192.727   2
   0  28 -10 2159.79 211.337   1
   0 -28  11 764.884 138.434   2
   0  28 -11 848.328 136.771   1
   0  28 -11 631.241 129.354   6
   0  28 -12-31.9340 66.9715   6
   0 -28  12-29.3778 78.0202   2
   0  28 -12 18.2612 55.4193   1
   0 -28  13 1953.28 218.372   2
   0  28 -13 2254.33 221.771   1
   0  28 -13 2366.04 237.056   6
   0 -28 -14-8.27121 65.7709   4
   0 -28  14 38.5556 63.5510   2
   0  28 -14 150.272 86.6314   6
   0  28 -14 153.472 91.5248   1
   0 -28 -15 540.802 113.332   4
   0 -28  15 734.577 145.198   2
   0  28 -15 1322.97 180.377   6
   0  28 -15 595.240 121.857   1
   0 -28 -16 230.242 79.4850   4
   0 -28  16 146.673 88.4410   2
   0  28 -16 279.314 85.7844   1
   0  28 -16 233.891 90.3139   6
   0 -28  17 167.718 91.4518   2
   0  28 -17 220.387 98.8984   6
   0 -28 -17 24.9711 56.1329   4
   0  28 -18 290.340 103.428   6
   0 -28 -18 221.530 100.915   4
   0 -28  18 161.271 91.7588   2
   0 -28  19 9.92949 77.9290   2
   0  28 -19 58.0295 75.1543   6
   0 -28 -19 14.2007 51.6593   4
   0  28 -20 1316.79 187.702   6
   0 -28  20 1405.96 210.229   2
   0 -28 -20 1242.18 184.305   4
   0 -28  21 220.168 105.087   2
   0  28 -21 358.334 120.227   6
   0 -28 -21 294.754 93.9450   4
   0  28 -22 67.0560 70.1038   6
   0 -28  22 1.93105 72.4557   2
   0 -28 -22 15.6769 56.5686   4
   0 -28  23-79.9991 97.1372   2
   0  28 -23-24.5148 73.8366   6
   0 -28 -23-85.8361 78.7954   4
   0  28 -24 65.5746 67.7976   6
   0 -28 -24 77.7008 75.0384   4
   0 -28  24 45.4742 97.1669   2
   0  28 -25 241.206 115.060   6
   0 -28  25 57.4455 87.1124   2
   0  28 -26 908.605 168.655   6
   0 -28  26 871.551 193.344   2
   0 -28 -26 229.981 93.4247   4
   0 -28 -27-15.8524 96.7524   4
   0 -29   0 60.6750 37.9010   2
   0  29   0-1.88789 63.3069   6
   0  29   0 38.0840 71.3276   1
   0  29  -1 492.711 122.053   1
   0 -29   1 436.703 84.9307   2
   0  29   1 514.786 125.554   1
   0 -29  -1 421.821 76.7447   2
   0  29  -1 421.428 112.523   6
   0  29   1 548.932 130.286   6
   0  29  -2 28.0158 60.2305   6
   0  29  -2-21.2009 69.6545   1
   0  29   2 5.34310 66.8205   6
   0 -29   2 26.5926 45.2042   2
   0 -29  -2 10.5142 34.8325   2
   0  29   2 64.5155 80.5928   1
   0 -29   3 452.436 94.1754   2
   0 -29  -3 470.874 77.7766   2
   0  29  -3 505.849 124.600   6
   0  29  -3 710.594 138.961   1
   0  29   3 400.611 111.134   6
   0  29   3 411.154 103.949   1
   0  29  -4 158.999 103.169   1
   0  29   4 175.462 98.7161   6
   0  29  -4 167.919 98.3438   6
   0  29   4 218.880 100.051   1
   0 -29   4 90.0502 70.5952   2
   0  29  -5 4100.51 308.494   6
   0  29   5 3670.00 305.182   6
   0  29  -5 3617.28 279.566   1
   0  29   5 3903.38 304.339   1
   0 -29   5 3762.95 261.005   2
   0  29   6 820.716 152.859   1
   0  29  -6 786.988 139.740   1
   0  29  -6 886.787 165.525   6
   0  29   6 746.943 153.224   6
   0 -29   6 669.213 117.506   2
   0  29   7 118.634 87.1998   6
   0  29  -7 183.419 81.9487   1
   0  29  -7 249.299 96.4292   6
   0  29   7 104.712 89.7927   1
   0 -29   7 155.623 69.1098   2
   0  29  -8 431.869 111.990   6
   0  29  -8 532.132 121.060   1
   0 -29   8 466.769 106.460   2
   0  29  -9 15.7699 65.1670   6
   0 -29   9 21.5302 59.5373   2
   0  29  -9 64.5765 65.6007   1
   0 -29  10 38.1665 54.4646   2
   0  29 -10 107.982 70.9353   1
   0  29 -10 84.2508 71.6135   6
   0  29 -11-9.39598 55.0650   1
   0  29 -11-11.1926 62.7465   6
   0 -29  11-57.4669 66.7197   2
   0  29 -12 20.3160 56.6129   1
   0 -29  12-6.13913 67.7018   2
   0  29 -12 137.347 79.9093   6
   0  29 -13 166.408 77.5661   1
   0  29 -13 91.6658 58.3990   6
   0 -29  13 152.174 77.9495   2
   0  29 -14 442.762 121.856   6
   0 -29  14 317.378 105.940   2
   0  29 -14 163.734 82.3030   1
   0  29 -15 106.181 82.4544   6
   0  29 -15 184.867 78.3673   1
   0 -29  15 202.604 97.2686   2
   0 -29 -15 41.2824 64.6258   4
   0 -29  16 50.0511 73.6161   2
   0  29 -16-59.8246 69.5420   1
   0  29 -16 117.646 76.2196   6
   0 -29 -16-28.7721 75.9837   4
   0  29 -17-26.0360 64.0275   1
   0 -29  17 107.749 90.3931   2
   0  29 -17 49.3820 74.0833   6
   0 -29 -17-22.9245 67.7721   4
   0 -29  18 793.248 160.962   2
   0  29 -18 542.601 120.876   1
   0  29 -18 516.520 126.959   6
   0 -29 -18 495.787 114.208   4
   0 -29  19 57.5860 88.1647   2
   0 -29 -19-94.7199 83.5796   4
   0  29 -19 51.7025 70.2210   6
   0 -29 -20 116.726 90.8783   4
   0  29 -20 61.4688 77.0319   6
   0 -29  20 180.482 106.080   2
   0 -29  21 353.374 125.586   2
   0  29 -21 245.228 106.416   6
   0 -29 -21 408.494 121.720   4
   0  29 -22 405.150 127.329   6
   0 -29 -22 258.512 94.7214   4
   0 -29  22 420.761 137.062   2
   0  29 -23 50.1478 67.2899   6
   0 -29  23-26.8017 77.7001   2
   0 -29 -23-6.99565 78.4069   4
   0  29 -24 117.976 76.9924   6
   0 -29  24-32.9227 91.1018   2
   0 -29 -24-44.5763 76.2252   4
   0  29 -25 153.353 81.6659   6
   0 -29  25 180.900 111.102   2
   0 -29 -25-175.276 124.992   4
   0 -29 -26-30.0059 121.810   4
   0 -30   0 3153.60 212.129   2
   0  30   0 3048.93 274.021   6
   0  30   0 3222.22 279.038   1
   0 -30  -1 526.854 89.0294   2
   0  30  -1 360.956 97.5839   6
   0  30   1 322.716 110.442   6
   0  30  -1 424.641 118.568   1
   0 -30   1 453.280 91.8058   2
   0  30   1 539.002 129.656   1
   0  30  -2 946.876 157.985   1
   0 -30   2 988.027 131.429   2
   0  30   2 923.683 162.947   1
   0  30   2 675.658 143.336   6
   0  30  -2 836.353 162.294   6
   0  30  -3 2064.86 227.341   6
   0  30   3 2052.01 235.384   6
   0  30  -3 2320.44 233.756   1
   0 -30   3 2046.39 188.388   2
   0  30   3 2241.66 237.044   1
   0  30  -4 612.914 130.093   1
   0  30  -4 438.561 120.033   6
   0  30   4 721.263 149.133   1
   0 -30   4 526.958 105.743   2
   0  30   4 538.271 132.891   6
   0  30  -5 403.328 118.828   6
   0  30   5 208.626 105.198   6
   0  30  -5 183.648 88.2537   1
   0 -30   5 120.410 57.5175   2
   0  30   5 93.8975 80.7044   1
   0 -30   6 44.6613 50.7202   2
   0  30   6 178.393 86.4141   6
   0  30  -6 201.145 79.4361   1
   0  30   6 107.895 77.0971   1
   0  30  -6 105.420 81.2200   6
   0  30  -7 22.8127 57.4402   6
   0  30  -7 11.3806 55.4071   1
   0  30   7-54.9578 80.2590   6
   0 -30   7-17.5490 60.7774   2
   0 -30   8 87.4845 73.9428   2
   0  30  -8-23.2386 71.3740   1
   0  30  -8 37.9418 65.9202   6
   0  30  -9 165.237 87.7069   6
   0  30  -9 29.9538 63.6213   1
   0 -30   9 49.4716 66.4539   2
   0 -30  10 0.85644 63.4952   2
   0  30 -10-121.783 92.1385   6
   0  30 -10 27.9116 68.6617   1
   0 -30  11 116.607 72.9397   2
   0  30 -11 110.252 65.1179   1
   0  30 -11 195.657 88.3777   6
   0  30 -12 571.298 128.357   6
   0 -30  12 616.966 136.838   2
   0  30 -12 563.913 122.348   1
   0 -30  13 52.9191 63.2380   2
   0  30 -13 90.3977 77.9564   6
   0  30 -13 37.0565 61.3954   1
   0  30 -14 581.740 130.882   6
   0  30 -14 641.286 128.102   1
   0 -30  14 676.591 144.981   2
   0  30 -15 522.762 128.086   6
   0 -30 -15 217.708 80.2005   4
   0 -30  15 329.844 118.104   2
   0  30 -15 279.201 98.2340   1
   0 -30 -16-118.187 84.5367   4
   0 -30  16 51.9715 71.9042   2
   0  30 -16-42.8488 60.9199   1
   0  30 -17 159.039 90.1361   6
   0 -30  17 7.37466 79.5583   2
   0  30 -17 87.1633 66.1892   1
   0 -30 -17-6.03598 78.3399   4
   0 -30 -18 254.431 100.791   4
   0  30 -18 51.6306 89.8850   6
   0 -30  18 139.625 87.9961   2
   0  30 -18 219.565 85.1303   1
   0  30 -19 169.088 94.1296   1
   0 -30  19 295.256 116.187   2
   0 -30 -19 446.925 111.803   4
   0  30 -19 532.547 136.645   6
   0 -30 -20 176.933 80.4283   4
   0 -30  20 187.116 113.807   2
   0  30 -20 157.461 72.0675   1
   0  30 -20 205.536 107.344   6
   0 -30  21 471.864 140.953   2
   0 -30 -21 485.890 125.918   4
   0  30 -21 755.522 158.252   6
   0  30 -21 464.273 123.601   1
   0 -30 -22 335.460 119.676   4
   0 -30  22 507.267 148.229   2
   0  30 -22 474.950 125.121   6
   0 -30 -23 48.8137 61.3642   4
   0 -30  23-12.5223 89.6736   2
   0  30 -23 39.7509 98.3785   6
   0  30 -24 522.447 129.316   6
   0 -30  24 534.567 152.652   2
   0 -30 -24 536.013 123.842   4
   0  30 -25 105.817 93.4161   6
   0 -30 -25-182.118 117.038   4
   0 -30  25 11.3769 89.2030   2
   0 -31   0 74.4057 47.5448   2
   0  31   0 308.618 116.874   1
   0  31   0 210.810 107.323   6
   0  31  -1 122.141 76.1266   6
   0  31   1 53.7342 74.9562   6
   0  31   1 191.048 88.0189   1
   0  31  -1 146.813 82.0773   1
   0 -31   1 219.148 79.7576   2
   0  31   2 12.4961 64.6344   6
   0  31   2-48.3076 72.4631   1
   0 -31   2 8.63212 42.9896   2
   0  31  -2 66.0194 65.7680   1
   0  31  -2-58.3107 75.2090   6
   0 -31   3 86.1726 58.7969   2
   0  31   3-26.1218 70.5548   1
   0  31   3-12.5792 87.6820   6
   0  31  -3 12.5431 78.8731   6
   0  31  -3 171.961 97.4023   1
   0  31   4 45.6541 67.4792   1
   0  31  -4 144.619 82.8008   6
   0 -31   4 62.5326 52.5003   2
   0  31   4 183.895 81.8737   6
   0  31  -4 136.814 85.9490   1
   0  31  -5 76.2248 77.0619   6
   0 -31   5-83.2169 57.6696   2
   0  31   5-73.7248 80.2334   1
   0  31   5-73.7399 77.4098   6
   0  31  -5 59.8081 70.7555   1
   0 -31   6 901.510 146.731   2
   0  31   6 814.601 157.025   1
   0  31   6 747.040 155.643   6
   0  31  -6 864.834 154.592   1
   0  31  -6 821.471 154.600   6
   0  31   7 1154.63 191.867   6
   0 -31   7 1194.17 170.241   2
   0  31  -7 1163.34 186.071   6
   0  31  -7 1057.28 175.125   1
   0 -31   8 353.322 104.611   2
   0  31  -8 392.830 117.471   6
   0  31  -8 208.776 99.7560   1
   0  31  -9 1366.34 187.609   1
   0  31  -9 1384.61 200.678   6
   0 -31   9 1455.20 185.448   2
   0  31 -10 40.6930 61.7042   1
   0 -31  10 53.8615 61.7167   2
   0  31 -10 81.5918 75.7384   6
   0 -31  11 290.368 100.522   2
   0  31 -11 42.4016 71.8904   1
   0  31 -11 286.304 102.631   6
   0 -31  12-68.4788 73.9224   2
   0  31 -12-152.464 104.854   1
   0  31 -12-78.6709 95.1499   6
   0 -31  13 35.5896 61.3172   2
   0  31 -13 57.3693 72.8785   6
   0  31 -13 155.484 67.9077   1
   0 -31  14 156.396 85.0506   2
   0  31 -14 106.200 62.8692   1
   0  31 -14 46.4102 71.2116   6
   0  31 -15 129.089 84.3076   6
   0  31 -15 109.831 56.0983   1
   0 -31 -15 58.1565 73.6223   4
   0 -31  15 57.4723 66.3111   2
   0  31 -16 590.440 128.708   1
   0 -31  16 493.466 123.875   2
   0 -31 -16 660.692 137.868   4
   0  31 -16 638.454 144.382   6
   0  31 -17 153.924 84.8481   1
   0 -31 -17 24.9203 76.8509   4
   0  31 -17 330.589 106.510   6
   0 -31  17 280.297 105.012   2
   0 -31 -18 258.996 92.6222   4
   0 -31  18 584.152 154.732   2
   0  31 -18 360.069 112.951   1
   0  31 -18 382.053 126.720   6
   0  31 -19 393.122 119.181   6
   0  31 -19 123.996 76.9341   1
   0 -31 -19 242.029 89.0521   4
   0 -31  19 338.722 124.510   2
   0 -31  20 244.370 124.001   2
   0  31 -20 224.709 95.5161   1
   0 -31 -20 68.4914 58.8781   4
   0  31 -20 298.188 108.097   6
   0  31 -21 261.759 113.915   6
   0 -31 -21 163.291 86.6409   4
   0  31 -21 79.4661 72.8274   1
   0 -31  21 93.8553 85.0298   2
   0 -31  22 103.633 108.494   2
   0  31 -22 20.0877 70.6191   6
   0 -31 -22 63.8402 65.2279   4
   0  31 -23 269.203 109.071   6
   0 -31 -23 295.896 105.405   4
   0 -31  23 116.239 86.2842   2
   0  31 -24 267.098 115.656   6
   0 -31 -24 320.049 114.460   4
   0 -31  24 332.714 143.530   2
   0 -31 -25 140.731 82.6021   4
   0  32   0 280.067 95.8256   6
   0  32   0 134.208 74.9237   1
   0 -32   1 135.662 61.7497   2
   0  32  -1 110.674 90.6266   1
   0  32  -1 65.5343 66.4727   6
   0  32   1-9.53080 76.5168   1
   0  32   1 243.982 103.532   6
   0  32  -2 377.386 119.420   6
   0  32  -2 599.081 129.091   1
   0  32   2 533.632 127.489   1
   0 -32   2 575.012 106.494   2
   0  32   2 431.084 122.688   6
   0  32   3 930.877 179.070   6
   0  32   3 1083.10 174.787   1
   0 -32   3 1168.37 149.783   2
   0  32  -3 969.473 170.763   6
   0  32  -3 1143.50 175.672   1
   0  32   4 67.8922 86.0824   6
   0  32   4 43.9808 73.1170   1
   0 -32   4 121.631 68.6795   2
   0  32  -4 156.708 94.7137   1
   0  32  -4 110.654 84.0472   6
   0  32  -5 556.336 131.656   1
   0  32   5 219.889 87.6245   6
   0  32   5 350.783 108.791   1
   0 -32   5 365.878 94.1504   2
   0  32  -5 295.560 108.403   6
   0  32  -6 879.122 158.162   1
   0  32   6 696.712 157.047   6
   0  32   6 984.563 178.679   1
   0 -32   6 713.514 132.079   2
   0  32  -6 929.955 178.252   6
   0  32  -7 100.953 86.2962   1
   0  32   7 4.61784 72.5365   6
   0  32  -7 21.2678 64.3230   6
   0 -32   7 71.2281 74.2025   2
   0  32  -8 51.3694 81.2866   6
   0  32  -8-37.9217 67.7063   1
   0 -32   8-74.2741 71.5488   2
   0  32  -9 894.251 160.483   1
   0 -32   9 978.131 157.338   2
   0  32  -9 838.366 159.500   6
   0  32 -10 193.283 95.0878   1
   0 -32  10 226.998 83.4101   2
   0  32 -10 250.777 114.062   6
   0  32 -11 565.494 147.271   6
   0  32 -11 698.642 135.077   1
   0 -32  11 585.789 133.566   2
   0  32 -12-6.12602 66.2823   1
   0 -32  12 134.960 92.7181   2
   0  32 -12-1.42859 74.7747   6
   0  32 -13 131.699 80.2582   1
   0 -32  13 158.539 88.1586   2
   0  32 -13 291.263 97.7390   6
   0 -32  14 214.464 100.449   2
   0  32 -14 70.8510 74.0240   6
   0  32 -14 147.913 84.9354   1
   0 -32 -15 225.187 85.8449   4
   0  32 -15 290.567 101.750   1
   0  32 -15 295.819 117.689   6
   0 -32  15 268.975 111.396   2
   0 -32  16-56.6544 83.6602   2
   0 -32 -16 9.60172 75.1454   4
   0  32 -16 43.3817 67.7157   1
   0  32 -16-11.2453 62.5397   6
   0  32 -17 161.534 80.7821   1
   0 -32 -17 14.3685 65.7244   4
   0  32 -17 107.496 81.6049   6
   0 -32  17 227.679 107.563   2
   0  32 -18 68.5526 81.8125   6
   0  32 -18 195.306 89.7819   1
   0 -32 -18 14.5632 58.4561   4
   0 -32  18 80.1189 75.9665   2
   0  32 -19 115.221 95.7093   6
   0 -32  19-56.2261 89.1133   2
   0  32 -19 72.0608 83.2645   1
   0 -32 -19 84.4393 62.5757   4
   0 -32 -20-40.4850 77.2498   4
   0  32 -20 36.4049 82.3469   6
   0 -32  20 40.5639 83.3633   2
   0  32 -20 19.9028 59.4446   1
   0  32 -21-105.187 80.0302   6
   0 -32 -21-57.7925 83.8248   4
   0  32 -21 38.6470 74.7846   1
   0 -32  21-114.957 111.272   2
   0  32 -22-184.603 106.048   6
   0 -32  22-45.5242 93.4099   2
   0 -32 -22 30.2102 61.7126   4
   0  32 -23 141.992 87.0338   6
   0 -32  23 224.547 116.268   2
   0 -32 -23-30.1350 92.1991   4
   0  32 -24-58.4939 76.4165   6
   0 -32 -24 42.1258 64.6280   4
   0  33   0-108.027 84.5602   6
   0  33   0-66.2177 81.5934   1
   0  33   1 862.910 161.059   6
   0  33  -1 822.948 156.418   1
   0  33  -1 887.890 176.592   6
   0  33   1 732.882 156.248   1
   0  33  -2 613.401 145.565   1
   0  33  -2 583.873 144.760   6
   0  33   2 549.729 145.248   1
   0  33   2 548.308 143.473   6
   0  33   3 1469.60 209.393   1
   0  33  -3 1205.61 198.605   6
   0  33  -3 1421.22 205.887   1
   0  33   3 1616.81 222.884   6
   0 -33   3 1439.25 172.270   2
   0 -33   4 1977.46 199.919   2
   0  33   4 2093.00 247.767   1
   0  33  -4 2175.46 241.467   1
   0  33  -4 1740.59 227.212   6
   0  33   4 1821.26 240.732   6
   0  33  -5 648.105 154.114   1
   0  33   5 368.184 126.967   1
   0  33  -5 222.726 117.171   6
   0 -33   5 316.428 95.7987   2
   0  33   5 371.923 130.491   6
   0  33  -6 1728.48 211.860   1
   0 -33   6 1855.53 204.107   2
   0  33   6 1690.00 233.219   6
   0  33  -6 1798.58 235.744   6
   0  33   6 1944.75 237.917   1
   0  33   7 308.308 119.287   6
   0  33  -7 347.610 116.375   6
   0 -33   7 262.950 102.341   2
   0  33  -7 259.560 107.080   1
   0 -33   8 193.829 81.2234   2
   0  33  -8 441.023 115.182   1
   0  33  -8 288.120 102.492   6
   0 -33   9-103.335 89.9604   2
   0  33  -9-91.3166 67.4856   1
   0  33  -9 123.407 88.7163   6
   0  33 -10-77.1853 74.9440   6
   0 -33  10 84.6765 68.6800   2
   0  33 -10 32.3268 62.2402   1
   0  33 -11 1142.75 188.735   6
   0  33 -11 1469.53 198.903   1
   0 -33  11 1313.79 189.104   2
   0  33 -12 277.927 109.440   1
   0  33 -12 90.2132 79.9289   6
   0 -33  12 52.9278 73.0678   2
   0  33 -13 170.122 96.4233   1
   0 -33  13 84.6353 83.2869   2
   0  33 -13 74.3575 84.9413   6
   0  33 -14 385.304 118.940   1
   0 -33  14 362.954 115.350   2
   0  33 -14 206.576 93.9598   6
   0 -33 -15 73.1110 62.5782   4
   0 -33  15-138.266 93.1573   2
   0  33 -15 43.7589 72.5273   6
   0  33 -15 45.4049 77.4297   1
   0  33 -16 726.776 154.154   6
   0  33 -16 652.934 137.308   1
   0 -33  16 668.335 151.852   2
   0 -33 -16 567.471 137.139   4
   0 -33  17-165.119 104.080   2
   0  33 -17 29.4401 69.4889   6
   0  33 -17 39.2624 65.9855   1
   0 -33 -17-72.9658 84.1937   4
   0  33 -18 85.5397 67.9726   1
   0 -33 -18-26.5822 69.1527   4
   0 -33  18 39.0319 78.9252   2
   0  33 -18 18.4301 92.4794   6
   0 -33  19 324.129 120.179   2
   0  33 -19 326.364 115.114   1
   0  33 -19 249.745 114.650   6
   0 -33 -19 201.892 84.9995   4
   0 -33  20-62.6193 75.0827   2
   0  33 -20 7.33928 68.1945   1
   0  33 -20-14.4481 70.3495   6
   0 -33 -20-44.6094 59.3359   4
   0 -33  21 260.182 127.161   2
   0  33 -21 74.7132 74.3649   6
   0 -33 -21 60.9392 65.7860   4
   0 -33 -22 3.47502 63.9565   4
   0  33 -22-43.1015 75.3223   6
   0 -33  22-165.101 111.546   2
   0 -33 -23 0.57575 68.3794   4
   0  33 -23-93.2757 95.9600   6
   0  34   0-47.9255 69.7320   1
   0  34   0-69.8896 93.2471   6
   0  34   1 420.241 112.447   6
   0  34  -1 289.185 107.334   6
   0  34   1 339.666 116.184   1
   0  34  -1 292.891 107.540   1
   0  34   2 879.777 168.906   1
   0  34   2 1072.03 186.762   6
   0  34  -2 994.471 179.022   6
   0  34  -2 1145.93 190.133   1
   0  34  -3 74.3949 84.8535   6
   0  34   3 356.455 135.797   6
   0  34  -3 221.161 105.298   1
   0  34   3 538.373 149.549   1
   0 -34   4 2373.91 223.659   2
   0  34  -4 2656.84 272.799   1
   0  34  -4 2131.16 255.131   6
   0  34   4 2583.53 287.556   6
   0  34   4 2638.79 279.933   1
   0  34  -5 42.8945 87.4193   6
   0  34   5 116.989 105.530   1
   0  34   5 63.4461 101.392   6
   0 -34   5 18.2958 54.6026   2
   0  34  -5-2.11058 81.8683   1
   0  34   6 0.16639 77.9210   6
   0  34  -6 67.7682 69.8063   1
   0 -34   6-14.1426 63.0386   2
   0  34  -6 163.910 101.103   6
   0  34  -7 521.743 142.792   6
   0  34  -7 493.077 131.792   1
   0 -34   7 582.081 125.961   2
   0  34  -8 109.573 83.4468   6
   0 -34   8-93.4231 79.9504   2
   0  34  -8 82.4988 83.1112   1
   0  34  -9-124.955 91.7128   6
   0  34  -9 36.7480 65.3367   1
   0 -34   9-0.53337 59.3948   2
   0  34 -10-154.144 99.4156   1
   0  34 -10-9.87343 70.1398   6
   0 -34  10-196.105 112.827   2
   0  34 -11 481.684 121.201   1
   0  34 -11 398.854 127.427   6
   0 -34  11 503.164 126.244   2
   0 -34  12 122.397 88.0867   2
   0  34 -12 170.827 105.103   6
   0  34 -12 246.378 109.204   1
   0 -34  13 2048.09 249.393   2
   0  34 -13 2649.95 280.292   6
   0  34 -13 1969.69 232.739   1
   0  34 -14-58.9213 80.6526   1
   0 -34  14-109.133 85.7560   2
   0  34 -14 215.052 108.030   6
   0 -34  15 141.378 90.8786   2
   0  34 -15 146.972 75.9146   1
   0  34 -15 108.716 86.0305   6
   0 -34 -15 21.1925 76.6102   4
   0  34 -16-125.026 87.7564   1
   0 -34  16-60.8965 72.5515   2
   0  34 -16-29.0578 83.5611   6
   0 -34 -16-14.3184 77.5296   4
   0  34 -17 18.5197 69.1848   1
   0  34 -17-14.3002 73.0296   6
   0 -34 -17-37.0315 81.5815   4
   0 -34  17-15.5872 82.7547   2
   0  34 -18 206.545 99.4698   1
   0 -34 -18 39.0671 72.6629   4
   0 -34  18 82.6866 90.5511   2
   0  34 -18 118.471 90.7953   6
   0 -34  19-65.4363 102.850   2
   0 -34 -19 59.0990 68.7581   4
   0  34 -19-52.4499 84.7416   6
   0  34 -19 90.3703 79.8887   1
   0 -34 -20 463.883 130.204   4
   0  34 -20 93.1788 92.7276   6
   0  34 -20 262.919 103.507   1
   0 -34  20 171.652 108.991   2
   0 -34 -21 103.950 73.2990   4
   0  34 -21 371.153 124.538   6
   0 -34  21 221.680 123.294   2
   0 -34 -22 734.142 159.148   4
   0  34 -22 751.886 173.592   6
   0  34 -23 302.595 125.736   6
   0  35   0 26.3032 83.4109   6
   0  35   0 93.7428 89.4853   1
   0  35  -1 209.451 107.371   1
   0  35   1 126.352 95.9320   6
   0  35  -1 108.883 102.516   6
   0  35   1 152.521 82.5267   1
   0  35  -2 2447.76 262.053   1
   0  35   2 2603.69 283.626   1
   0  35   2 2604.05 286.757   6
   0  35  -2 2303.28 262.795   6
   0  35  -3 133.469 96.8405   6
   0  35  -3 257.792 124.148   1
   0  35   3 238.462 120.760   6
   0  35   3 398.836 146.098   1
   0  35   4 800.120 176.801   6
   0  35  -4 737.176 164.872   6
   0  35  -4 1004.89 177.416   1
   0  35   4 922.338 177.387   1
   0  35   5 118.835 98.9709   6
   0  35  -5 209.211 104.679   6
   0  35  -5-51.6411 75.4892   1
   0  35   5 320.471 117.433   1
   0  35  -6 493.756 143.422   6
   0 -35   6 377.703 105.450   2
   0  35  -6 323.119 117.217   1
   0  35   6 240.961 108.716   6
   0 -35   7 116.631 84.0603   2
   0  35  -7 42.6764 97.8699   1
   0  35  -7 222.451 128.151   6
   0  35  -8 1401.28 212.738   6
   0 -35   8 1204.48 177.430   2
   0  35  -8 1577.35 215.924   1
   0  35  -9 78.6114 87.5034   6
   0 -35   9 45.2447 67.4741   2
   0  35  -9-62.2260 67.5092   1
   0 -35  10 42.6925 82.9552   2
   0  35 -10 209.207 109.149   1
   0  35 -10 228.227 117.651   6
   0  35 -11 1681.99 221.030   1
   0 -35  11 1742.30 224.478   2
   0  35 -11 2303.74 267.811   6
   0 -35  12 798.928 158.354   2
   0  35 -12 915.592 183.942   6
   0  35 -12 861.474 162.472   1
   0  35 -13 501.992 152.578   6
   0  35 -13 222.886 96.8086   1
   0 -35  13 83.6309 93.4356   2
   0  35 -14 42.5357 73.1368   1
   0  35 -14 254.355 115.871   6
   0 -35  14 171.730 103.584   2
   0 -35  15-76.0274 108.495   2
   0  35 -15-39.0974 93.1394   6
   0  35 -15 110.860 73.8037   1
   0 -35 -15-202.602 110.962   4
   0  35 -16 83.3268 73.0111   6
   0  35 -16 21.5540 63.2075   1
   0 -35 -16-7.84959 73.8443   4
   0 -35  16 60.3013 73.0609   2
   0  35 -17 32.0961 81.5324   1
   0 -35 -17-53.4722 78.4257   4
   0  35 -17 20.6628 71.7869   6
   0 -35  17 123.849 91.5487   2
   0  35 -18 8.33269 81.8487   6
   0  35 -18 49.2834 73.3216   1
   0 -35  18 109.301 92.0791   2
   0 -35 -18 77.6255 80.4417   4
   0 -35  19-29.1810 102.722   2
   0  35 -19-150.164 104.718   6
   0 -35 -19 58.2041 79.2532   4
   0  35 -19 1.83937 70.2897   1
   0 -35 -20 446.752 133.372   4
   0 -35  20 138.060 124.041   2
   0  35 -20 301.482 114.583   6
   0 -35 -21 40.1480 70.0597   4
   0 -35  21-116.336 102.500   2
   0  35 -21-3.07595 90.3228   6
   0 -35 -22 281.604 125.213   4
   0  35 -22 139.374 95.2871   6
   0  36   0 2377.09 267.748   1
   0  36   0 2792.96 303.270   6
   0  36   1 486.339 153.758   6
   0  36  -1 755.331 170.505   6
   0  36   1 674.572 160.546   1
   0  36  -1 561.013 158.820   1
   0  36   2 761.942 184.515   6
   0  36  -2 780.038 173.973   6
   0  36   2 1232.50 203.353   1
   0  36  -2 880.852 175.368   1
   0  36  -3 385.924 130.048   6
   0  36  -3 757.668 157.200   1
   0  36   3 748.026 166.777   1
   0  36   3 506.803 146.122   6
   0  36   4 398.677 133.224   6
   0  36   4 266.577 124.886   1
   0  36  -4 310.566 122.216   6
   0  36  -4 293.663 131.877   1
   0  36   5 408.427 139.656   6
   0  36  -5 607.671 142.845   1
   0  36  -5 664.863 159.926   6
   0  36  -6 417.043 125.959   6
   0  36  -6 451.815 132.902   1
   0  36   6 416.647 142.351   6
   0 -36   7 230.834 87.7368   2
   0  36  -7 393.977 131.652   1
   0  36  -7 271.715 109.117   6
   0  36  -8 212.805 108.909   6
   0 -36   8 209.451 89.7034   2
   0  36  -8 199.842 105.554   1
   0  36  -9 77.4188 83.2955   1
   0 -36   9 54.6429 79.5007   2
   0 -36  10 1188.34 183.217   2
   0  36 -10 1364.92 200.671   1
   0  36 -10 1226.26 201.309   6
   0  36 -11 92.7818 94.1372   6
   0  36 -11 167.827 102.942   1
   0 -36  11 32.6424 71.6926   2
   0 -36  12 28.0500 70.0743   2
   0  36 -12 134.483 104.399   6
   0 -36  13 46.2838 70.4550   2
   0  36 -13 144.996 115.121   1
   0  36 -13 101.949 70.8747   6
   0  36 -14 166.185 83.3370   6
   0  36 -14 30.6017 70.2263   1
   0 -36  14-38.3765 89.3690   2
   0 -36  15-59.3788 101.103   2
   0  36 -15-3.02861 69.4500   1
   0  36 -15 117.390 75.1180   6
   0  36 -16 109.538 93.3288   6
   0 -36  16-8.75739 81.6371   2
   0 -36 -16-92.3965 90.6581   4
   0  36 -16 76.6819 74.0750   1
   0 -36  17 58.5495 80.0527   2
   0 -36 -17-73.2329 87.4652   4
   0  36 -17 22.9107 77.2925   6
   0  36 -17-1.06266 66.0431   1
   0 -36 -18 452.584 132.146   4
   0  36 -18 523.500 150.249   6
   0 -36  18 553.611 154.556   2
   0  36 -18 650.836 152.114   1
   0  36 -19 23.8943 83.3139   6
   0 -36  19 200.549 115.175   2
   0 -36 -19 250.176 118.526   4
   0 -36 -20 886.581 185.897   4
   0 -36  20 1107.85 221.053   2
   0  36 -20 873.453 187.368   6
   0  36 -21 170.712 130.802   6
   0 -36 -21 92.0158 70.0226   4
   0  36 -22 309.445 129.026   6
   0  37   0 277.636 119.567   6
   0  37   0 159.615 79.6448   1
   0  37   1 1.65605 93.7550   6
   0  37  -1-33.2928 83.9600   1
   0  37   1 10.7040 88.6665   1
   0  37  -1 56.1072 89.7469   6
   0  37   2 258.788 105.361   1
   0  37  -2 123.619 82.4397   1
   0  37   2 383.342 135.575   6
   0  37  -2 213.390 103.476   6
   0  37  -3 130.448 105.409   6
   0  37  -3-28.0720 92.8531   1
   0  37   3 24.0074 89.8614   6
   0  37   3 36.9306 82.5708   1
   0  37   4 388.019 132.334   1
   0  37   4 287.963 140.950   6
   0  37  -4 311.475 112.597   1
   0  37  -4 153.359 77.0485   6
   0  37   5 200.588 118.799   6
   0  37  -5 19.0432 73.5040   6
   0  37  -5 88.7349 91.4326   1
   0  37  -6-136.169 97.6068   6
   0  37  -6-12.4965 70.9129   1
   0  37  -7 0.15644 78.9215   1
   0  37  -7-112.245 92.7646   6
   0  37  -8 545.878 132.981   1
   0  37  -8 384.002 131.972   6
   0  37  -9 282.761 117.366   1
   0  37  -9 454.660 145.796   6
   0 -37   9 305.935 109.239   2
   0  37 -10-51.2584 78.9814   1
   0 -37  10 79.3130 75.5940   2
   0  37 -10 206.568 109.415   6
   0  37 -11 535.642 132.250   1
   0 -37  11 527.622 135.136   2
   0  37 -11 378.451 134.084   6
   0  37 -12-1.08940 82.8686   1
   0  37 -12 46.3816 93.1353   6
   0 -37  12-62.0467 76.9771   2
   0  37 -13 243.244 117.125   1
   0 -37  13 93.2665 77.7620   2
   0  37 -13 188.035 113.596   6
   0  37 -14 363.249 129.960   6
   0 -37  14 315.102 113.925   2
   0  37 -14 393.373 124.862   1
   0  37 -15-82.7503 93.9167   6
   0 -37 -15-44.8227 78.2216   4
   0  37 -15 56.9607 89.4333   1
   0 -37  15 4.70202 85.2182   2
   0 -37  16 99.7132 96.4727   2
   0  37 -16 53.6836 87.6580   6
   0 -37 -16-145.609 105.357   4
   0  37 -16 132.948 96.1768   1
   0  37 -17 535.117 141.628   1
   0 -37  17 225.072 125.479   2
   0 -37 -17 185.533 94.0690   4
   0  37 -17 189.916 111.353   6
   0  37 -18 243.214 120.531   6
   0 -37  18 421.830 163.252   2
   0 -37 -18 313.508 129.274   4
   0  37 -18 445.915 145.056   1
   0 -37  19 505.641 168.314   2
   0 -37 -19 505.693 140.567   4
   0  37 -19 369.030 125.428   6
   0  37 -20-25.6700 86.4115   6
   0 -37 -20 215.254 110.664   4
   0  37 -21 82.7629 92.9363   6
   0  38   0 5.79695 83.1231   1
   0  38   0 32.3091 85.8693   6
   0  38  -1 237.292 114.420   6
   0  38   1 437.111 128.974   1
   0  38   1 356.557 134.214   6
   0  38  -1 130.326 87.7909   1
   0  38   2 509.098 139.906   1
   0  38  -2 463.128 138.495   6
   0  38   2 486.194 143.057   6
   0  38  -2 422.486 129.931   1
   0  38   3 445.734 138.370   1
   0  38   3 358.181 125.658   6
   0  38  -3 627.812 176.896   6
   0  38  -3 209.290 104.346   1
   0  38   4 900.608 183.715   6
   0  38  -4 1072.88 199.320   6
   0  38  -4 771.446 169.827   1
   0  38  -5 38.7248 71.1880   1
   0  38  -5 0.26484 90.1757   6
   0  38   5 53.8603 102.134   6
   0  38  -6 233.456 105.156   1
   0  38  -6 270.341 112.291   6
   0  38  -7 181.027 112.480   1
   0  38  -7 233.187 116.638   6
   0  38  -8 739.767 160.628   1
   0  38  -8 491.296 143.188   6
   0  38  -9 124.347 120.733   6
   0  38  -9 3.54856 67.9649   1
   0  38 -10 266.073 127.960   6
   0  38 -10 214.297 106.440   1
   0  38 -11 433.218 136.768   1
   0 -38  11 346.243 117.983   2
   0  38 -11 402.179 144.188   6
   0  38 -12 625.200 152.363   1
   0  38 -12 957.992 212.122   6
   0 -38  12 549.876 144.125   2
   0  38 -13 914.073 195.367   6
   0  38 -13 924.494 180.917   1
   0 -38  13 782.875 162.585   2
   0  38 -14 124.391 111.033   6
   0 -38  14 141.323 94.0566   2
   0  38 -14 64.9540 88.0971   1
   0 -38  15 437.550 137.301   2
   0 -38 -15 363.310 125.318   4
   0  38 -15 414.939 126.264   1
   0  38 -15 352.459 130.175   6
   0 -38  16 504.715 144.798   2
   0 -38 -16 359.375 122.237   4
   0  38 -16 656.582 155.687   1
   0  38 -16 400.822 141.027   6
   0  38 -17 234.546 103.012   1
   0  38 -17-6.78137 96.9261   6
   0 -38  17 95.7460 85.2652   2
   0 -38 -17-90.0211 89.1423   4
   0 -38  18 439.896 155.333   2
   0  38 -18 211.561 112.513   6
   0 -38 -18 461.436 145.788   4
   0 -38 -19 115.394 89.0150   4
   0  38 -19 156.573 133.591   6
   0  38 -20 65.4790 81.6674   6
   0  39   0-133.685 102.952   6
   0  39   0-34.2161 97.9190   1
   0  39  -1-76.9817 75.6257   6
   0  39  -1-50.8248 96.6062   1
   0  39   1-24.0963 84.8074   1
   0  39   1 109.937 90.1823   6
   0  39  -2 26.1342 73.9413   1
   0  39   2-145.297 110.607   6
   0  39  -2 94.0544 89.9912   6
   0  39   2 162.572 107.538   1
   0  39   3 145.300 106.933   1
   0  39  -3 107.136 91.5170   1
   0  39  -3 130.972 108.930   6
   0  39   3 265.410 126.588   6
   0  39   4 624.222 163.279   6
   0  39  -4 1058.08 197.262   1
   0  39  -4 592.442 163.261   6
   0  39   5 95.7702 120.153   6
   0  39  -5 70.5598 98.5156   6
   0  39  -5 78.1773 99.3194   1
   0  39  -6 1436.76 233.732   6
   0  39  -6 1559.28 228.250   1
   0  39  -7-112.050 101.491   6
   0  39  -7-6.15100 85.3054   1
   0  39  -8-21.9882 82.8292   6
   0  39  -8 51.1004 72.7118   1
   0  39  -9-119.467 96.7744   6
   0  39  -9-55.0926 77.8385   1
   0  39 -10-23.2698 73.2139   1
   0  39 -10 90.6250 99.3562   6
   0  39 -11 54.4259 103.612   6
   0  39 -11 59.3921 72.5625   1
   0  39 -12 176.513 115.000   1
   0  39 -12 189.878 115.445   6
   0 -39  12 12.8140 68.7873   2
   0 -39  13 159.231 89.7079   2
   0  39 -13 285.775 122.983   6
   0  39 -13 140.849 105.787   1
   0 -39  14 72.1129 82.6983   2
   0  39 -14 73.8709 89.0840   1
   0  39 -14 345.921 134.615   6
   0 -39 -15-165.186 120.590   4
   0  39 -15-8.10585 82.2688   1
   0 -39  15 61.1478 81.4705   2
   0  39 -15 71.2262 77.0349   6
   0 -39  16 88.7736 99.0009   2
   0 -39 -16 116.839 86.4365   4
   0  39 -16 170.412 127.678   6
   0  39 -16-6.61064 68.1631   1
   0  39 -17 124.783 90.9626   6
   0 -39  17 310.539 132.427   2
   0 -39 -17-84.9246 98.0170   4
   0 -39 -18-155.609 105.370   4
   0  39 -18-59.6137 80.1412   6
   0  39 -19 106.515 102.758   6
   0  39 -20 106.490 88.8624   6
   0  40   0 470.845 134.200   1
   0  40   0 614.545 164.432   6
   0  40  -1 50.3890 99.9250   1
   0  40  -1 280.865 125.899   6
   0  40   1 238.045 120.176   6
   0  40   1-25.3671 77.0786   1
   0  40  -2-56.9305 107.879   6
   0  40  -2-146.876 106.016   1
   0  40   2 206.949 125.205   6
   0  40   2 83.2347 84.6964   1
   0  40   3-118.613 114.826   6
   0  40  -3 26.3138 84.1204   6
   0  40  -3-165.500 117.868   1
   0  40  -4-114.340 112.420   1
   0  40   4 72.9277 77.1751   6
   0  40  -4-85.2473 104.122   6
   0  40  -5 102.767 85.8078   6
   0  40  -5 255.109 118.882   1
   0  40  -6 602.192 155.204   1
   0  40  -6 416.712 150.873   6
   0  40  -7 148.798 108.021   6
   0  40  -7 114.105 81.2037   1
   0  40  -8-155.293 115.257   6
   0  40  -8-131.445 103.740   1
   0  40  -9 136.245 95.6511   1
   0  40  -9 36.5074 102.318   6
   0  40 -10 683.156 165.269   1
   0  40 -10 409.174 142.790   6
   0  40 -11 307.578 129.130   6
   0  40 -11 678.434 165.427   1
   0  40 -12 88.8792 99.0042   6
   0  40 -12 114.390 103.129   1
   0  40 -13 219.347 108.399   1
   0  40 -13 163.565 102.962   6
   0 -40  14 192.179 128.089   2
   0  40 -14 138.576 94.4102   1
   0  40 -14 83.7838 98.6809   6
   0  40 -15 84.3699 88.7137   1
   0 -40 -15 30.2245 81.7918   4
   0  40 -15-16.1749 80.5471   6
   0 -40  15 88.2420 99.5104   2
   0  40 -16 120.872 90.9230   6
   0  40 -16 140.492 91.9123   1
   0 -40 -16-265.136 117.858   4
   0 -40  16 79.9487 96.5146   2
   0  40 -17-145.029 99.9940   6
   0  40 -18 75.8744 90.1536   6
   0  41   0-16.7441 79.4730   1
   0  41   0-39.0833 88.5180   6
   0  41  -1 45.6871 79.7526   1
   0  41   1 77.0690 93.4783   1
   0  41   1 108.354 102.479   6
   0  41  -1-6.57416 113.878   6
   0  41   2 675.467 178.172   6
   0  41  -2 826.078 180.984   1
   0  41  -2 864.726 186.712   6
   0  41  -3-109.964 106.944   1
   0  41  -3 30.3069 79.9614   6
   0  41  -4 167.176 91.4695   1
   0  41  -4 74.8765 81.4277   6
   0  41  -5 259.803 124.313   1
   0  41  -5 28.2259 83.7678   6
   0  41  -6 776.240 176.789   1
   0  41  -6 483.935 170.807   6
   0  41  -7 72.4172 97.4467   6
   0  41  -7 167.725 102.982   1
   0  41  -8 366.109 142.700   6
   0  41  -8 418.685 142.667   1
   0  41  -9 312.098 117.333   1
   0  41  -9 251.481 115.730   6
   0  41 -10 212.899 120.984   6
   0  41 -10 460.422 144.309   1
   0  41 -11 237.501 133.897   6
   0  41 -11 279.893 117.282   1
   0  41 -12 558.086 148.277   1
   0  41 -12 335.613 142.897   6
   0  41 -13 84.8324 87.0992   1
   0  41 -13 22.9515 89.2373   6
   0  41 -14 112.519 104.296   6
   0  41 -14 90.7735 76.7200   1
   0  41 -15 73.5381 91.5196   1
   0  42  -6-164.869 104.348   1
   0  42  -7 32.9175 86.4548   1
   0  42  -8 100.631 82.8138   1
   0  42  -9-113.692 111.278   1
   0  42 -10-32.9776 80.0250   1
   0  42 -11 206.547 117.537   1
   0  42 -12 24.5313 77.1188   1
   1   0 -39 455.888 143.353   4
   1   0 -38 75.1890 85.3374   4
  -1   0  38-115.732 77.7949   2
   1   0 -37 13.2378 92.0392   4
  -1   0  37-46.4299 79.8136   2
   1   0 -36-136.981 76.5597   4
  -1   0  36 34.1373 70.5457   2
   1   0 -35 936.459 187.387   4
  -1   0  35 881.880 166.335   2
  -1   0  34-33.1631 79.3377   2
   1   0 -34-89.8540 103.187   4
   1   0 -33 372.904 112.175   4
  -1   0  33 467.827 123.172   2
   1   0 -32-88.1566 78.6977   4
  -1   0  32 77.1839 67.5962   2
  -1   0  31 464.343 114.236   2
   1   0 -31 193.488 90.6183   4
  -1   0  30 29.9305 74.4773   2
   1   0 -30-80.4932 72.5137   4
   1   0 -29 1032.96 174.774   4
  -1   0  29 1307.43 170.458   2
  -1   0  28 201.316 86.9012   2
   1   0 -28-50.9770 64.2216   4
  -1   0  27 2355.08 216.964   2
   1   0 -27 2190.86 223.664   4
  -1   0  26 136.398 76.2714   2
   1   0 -26-50.1953 63.0460   4
  -1   0  25 598.524 104.922   2
   1   0 -25 439.678 99.2540   4
  -1   0  24-4.40354 57.7541   2
   1   0 -24-13.0727 54.7147   4
  -1   0  23 36.9785 42.3676   2
   1   0 -23-13.1809 62.8645   4
  -1   0  22-4.66435 47.2442   2
   1   0 -22 105.583 70.3152   4
   1   0 -21 1797.96 180.271   4
  -1   0  21 1657.76 156.891   2
   1   0 -20 44.0322 62.8327   4
  -1   0  20-38.3287 44.4472   2
   1   0 -19 661.528 108.236   4
  -1   0  19 11.7582 48.5270   2
  -1   0  18-1.35812 45.2608   2
   1   0 -18-29.0359 41.9586   4
   1   0 -17 659.381 91.0853   4
  -1   0  17 886.910 106.069   2
   1   0 -16-15.3260 49.5484   4
  -1   0  16 87.3025 57.2086   2
   1   0 -15 6193.51 269.399   4
  -1   0  15 6483.65 255.648   2
   1   0 -15 7041.90 266.091   2
  -1   0  14 280.049 76.1212   2
  -1   0  14 120.192 62.1589   4
   1   0 -14 204.209 78.5940   4
   1   0 -14 56.7676 41.0969   2
  -1   0  13 19097.7 430.126   4
   1   0 -13 18136.8 394.767   2
  -1   0  13 17052.2 382.107   2
   1   0 -13 15901.7 397.843   4
  -1   0  12 14.6575 32.4499   4
   1   0 -12-8.90645 27.5629   2
  -1   0  12 102.916 51.4911   2
   1   0 -12 216.445 81.6034   4
   1   0 -11 2942.73 164.228   4
   1   0 -11 3029.16 148.898   2
  -1   0  11 2813.68 144.015   2
  -1   0  11 3432.17 170.324   4
   1   0 -10-25.7696 26.5569   2
   1   0 -10-32.7841 35.8414   4
  -1   0  10 4.49214 31.2703   4
  -1   0  10 15.4723 33.2694   2
  -1   0   9 5195.18 177.136   2
   1   0  -9 5562.32 182.046   2
   1   0  -8 32.7215 24.4707   2
  -1   0   8-30.8354 27.0338   2
   1   0  -8-8.70051 31.2081   4
  -1   0   8 7.53630 32.2113   4
   1   0  -7 173.834 39.4833   4
  -1   0   7 138.946 35.2106   2
  -1   0   7 123.217 35.0741   4
   1   0  -7 187.279 36.3885   2
   1   0  -6-3.69687 20.1373   2
   1   0  -6 2.21222 24.8187   4
  -1   0   6-6.98965 22.4389   4
  -1   0   6 9.65329 20.2085   2
  -1   0   5 669.089 58.2413   4
   1   0  -5 726.082 53.5728   2
  -1   0   5 675.771 53.2769   2
   1   0  -5 636.547 54.8789   4
  -1   0   4 0.05683 15.6124   2
   1   0  -4-6.71867 16.5248   4
   1   0  -4-3.75396 13.5736   2
  -1   0   4-1.14053 17.9602   4
  -1   0  -4 28.9817 15.2890   4
  -1   0  -4-0.62766 18.0211   5
  -1   0  -4-4.54401 16.9025   2
   1   0   4-0.31091 13.0650   4
   1   0   4 24.0625 18.3615   2
  -1   0  -5 34293.0 308.070   4
   1   0   5 33710.8 350.673   2
   1   0   5 34642.8 309.375   4
  -1   0  -5 35297.5 356.475   2
  -1   0  -6 20.5454 22.0963   2
   1   0   6-1.51205 19.6826   4
   1   0   6-5.77397 28.1047   2
  -1   0  -6 6.37198 22.0535   4
   1   0   7 11437.4 218.292   4
  -1   0  -7 11931.2 240.347   2
  -1   0  -7 11086.2 215.876   4
   1   0   7 11530.5 233.467   2
   1   0   8-36.9777 29.7720   2
  -1   0  -8-21.5879 24.2941   2
  -1   0  -9 1527.87 100.071   2
   1   0   9 1944.40 106.732   4
  -1   0  -9 2057.19 117.336   4
   1   0   9 1432.73 95.2467   2
   1   0  10 132.632 48.8347   2
   1   0  10-1.20360 25.7718   4
  -1   0 -10-3.29070 27.1789   2
  -1   0 -10 12.7740 35.6748   4
   1   0  11 1018.43 88.9488   4
   1   0  11 927.297 86.4252   2
  -1   0 -11 942.742 83.9376   4
  -1   0 -11 916.031 87.6303   2
   1   0  12 26.4226 35.8231   2
  -1   0 -12 24.1280 32.4597   2
   1   0  12-8.31017 29.5150   4
   1   0  13 230.119 47.8521   4
   1   0  13 197.750 49.9977   2
  -1   0 -13 220.380 54.3686   4
  -1   0 -13 255.338 51.9823   2
   1   0  14 5.69879 37.2560   4
  -1   0 -14 25.9839 42.0121   2
   1   0  14 24.4523 35.6383   2
  -1   0 -15 3245.35 182.962   4
   1   0  15 2539.69 161.590   2
   1   0  15 2971.61 173.382   4
  -1   0 -15 2684.51 167.686   2
  -1   0 -16 219.514 67.3494   4
   1   0  16 549.801 102.052   2
  -1   0 -17 345.294 81.1377   4
   1   0  17 526.633 98.9834   2
  -1   0 -18 231.235 73.6431   4
   1   0  18 464.657 109.974   2
   1   0  19 2708.81 189.082   2
  -1   0 -19 2584.67 192.355   4
   1   0  20-21.5606 38.9706   2
  -1   0 -20 31.4682 45.7679   4
   1   0  21 573.662 100.620   2
  -1   0 -21 895.197 136.242   4
  -1   0 -22-45.0061 57.1404   4
   1   0  22-27.4401 59.6624   2
   1   0  23-1.31309 58.5557   2
  -1   0 -23-33.3097 57.9247   4
   1   0  24-52.2341 56.1395   2
  -1   0 -24-164.219 79.5512   4
   1   0  25 26.8230 51.7345   2
  -1   0 -25 35.1895 70.8314   4
   1   0  26 7.13989 46.0918   2
  -1   0 -26-81.1503 104.653   4
  -1   0 -27 299.142 69.2578   4
   1   0  27 610.254 117.460   2
  -1   0 -28-143.754 101.733   4
   1   0  28-93.7006 72.3943   2
  -1   0 -29-196.489 122.297   4
   1   0  29 160.948 84.0736   2
   1   0  30-87.0222 69.1666   2
  -1   0 -30-128.308 114.989   4
   1   0  31 45.5445 55.8488   2
  -1   0 -31-154.057 90.1347   4
   1   0  32 55.4237 73.2047   2
  -1   0 -32 25.5351 76.2482   4
   1   0  33 3294.70 294.343   2
  -1   0 -33 3427.55 310.957   4
   1   0  34 163.447 77.9597   2
  -1   0 -34 266.449 125.298   4
  -1   0 -35 440.317 147.396   5
   1   0  35 507.604 134.620   2
  -1   0 -35 903.032 179.241   4
  -1   0 -36 188.001 146.284   5
  -1   0 -36 132.380 103.314   4
   1   0  36 120.622 91.5604   2
  -1   0 -37 689.529 159.738   4
   1   0  37 423.712 121.668   2
   1   0  38 215.223 108.478   2
  -1   0 -38 157.179 121.499   4
   1   1 -39 201.381 136.488   4
   1  -1 -39 80.2679 77.9554   4
  -1  -1  39 277.604 119.746   2
   1   1 -38 213.070 106.226   4
   1  -1 -38 192.298 106.546   4
  -1  -1  38 361.021 126.453   2
  -1  -1  37 57.5408 96.9620   2
   1  -1 -37 133.798 125.507   4
   1   1 -37 273.711 147.463   4
  -1   1  37 290.339 120.475   2
   1   1 -36 806.547 182.060   4
   1  -1 -36 908.042 181.649   4
  -1  -1  36 549.696 136.529   2
  -1   1  36 445.922 124.649   2
  -1   1  35 595.615 143.839   2
   1  -1 -35 540.395 147.807   4
   1   1 -35 752.172 161.562   4
  -1  -1  35 633.619 139.180   2
   1   1 -34 251.221 90.8249   4
   1  -1 -34 265.128 124.400   4
  -1   1  34 122.270 79.0174   2
  -1  -1  34-73.0694 74.3920   2
   1  -1 -33 158.768 98.6403   4
  -1  -1  33 404.955 112.221   2
   1   1 -33 268.338 93.1798   4
  -1   1  33 456.209 115.455   2
   1   1 -32 51.2790 80.9084   4
  -1  -1  32 33.4084 74.8001   2
   1  -1 -32 103.661 114.555   4
  -1   1  32 160.077 77.7738   2
  -1  -1  31 7.18102 73.1810   2
  -1   1  31 199.186 87.6329   2
   1  -1 -31 139.635 123.854   4
   1   1 -31-87.4007 90.8307   4
   1   1 -30 857.461 152.861   4
  -1  -1  30 858.621 147.828   2
  -1   1  30 988.444 154.293   2
   1  -1 -30 913.388 162.502   4
   1   1 -29 488.943 127.215   4
  -1  -1  29 802.154 141.521   2
   1  -1 -29 754.528 152.420   4
  -1   1  29 603.075 119.024   2
  -1  -1  28 1014.72 143.178   2
   1  -1 -28 978.960 159.442   4
  -1   1  28 1148.38 160.510   2
   1   1 -28 1157.42 160.329   4
  -1   1  27 218.537 78.7754   2
   1  -1 -27 261.791 92.0642   4
   1   1 -27 125.668 94.7964   4
  -1  -1  27 230.679 85.7924   2
  -1  -1  26-30.8367 50.8759   2
   1  -1 -26 88.4929 75.1050   4
  -1   1  26 15.0355 55.1237   2
   1   1 -26 8.78809 55.7888   4
   1  -1 -25 332.116 93.1522   4
  -1  -1  25 311.619 84.4646   2
   1   1 -25 368.124 93.5532   4
  -1   1  25 395.930 92.4551   2
   1  -1 -24 152.374 78.8038   4
  -1   1  24-4.23171 48.5894   2
  -1  -1  24 44.9562 51.3878   2
   1   1 -24-62.5341 81.7282   4
  -1   1  23 335.232 78.0848   2
   1  -1 -23 571.606 111.329   4
  -1  -1  23 271.890 70.6447   2
   1   1 -23 338.639 96.6506   4
   1  -1 -22 104.843 68.0323   4
  -1   1  22-7.52352 38.4603   2
   1   1 -22 139.100 67.7049   4
  -1  -1  22 64.8377 44.2649   2
   1   1 -21 736.773 119.452   4
   1  -1 -21 673.489 107.385   4
  -1   1  21 731.593 105.757   2
  -1  -1  21 763.673 111.749   2
   1   1 -20 692.153 117.127   4
  -1   1  20 670.283 101.573   2
   1  -1 -20 853.286 122.041   4
  -1  -1  20 667.152 105.246   2
   1   1 -19 1258.82 143.214   4
  -1  -1  19 1362.81 137.365   2
  -1   1  19 1463.48 140.570   2
   1  -1 -19 1998.42 200.665   4
   1  -1 -18 936.312 123.531   4
  -1   1  18 1173.12 121.928   2
  -1  -1  18 1056.11 119.451   2
   1   1 -18 1107.93 134.889   4
   1  -1 -17 3906.00 223.943   4
   1   1 -17 4681.45 255.583   4
  -1  -1  17 3857.93 216.666   2
  -1   1  17 4060.22 213.679   2
  -1   1  16 335.704 86.8178   2
   1   1 -16 394.177 110.138   4
   1  -1 -16 207.060 81.2566   4
   1  -1 -16 81.3252 48.1937   2
  -1  -1  16 343.429 85.6242   2
   1   1 -15 14471.3 412.912   4
   1  -1 -15 15564.6 412.699   4
  -1  -1  15 15064.8 394.144   2
   1   1 -15 16203.6 409.448   2
   1  -1 -15 16585.0 392.897   2
  -1   1  15 15448.0 382.560   2
  -1  -1  14 296.535 77.6562   2
  -1   1  14 172.461 59.5744   2
   1  -1 -14 164.937 68.1699   4
   1  -1 -14 112.165 42.9809   2
   1   1 -14 168.070 57.0196   2
   1   1 -14 169.894 70.2093   4
  -1   1  14 198.568 65.6792   4
  -1   1  13 70.5679 47.2712   2
   1   1 -13 129.656 63.6584   4
   1  -1 -13 77.4143 45.3768   4
  -1  -1  13 233.027 65.8361   2
   1   1 -13 287.698 68.0908   2
  -1   1  13-47.1035 43.2106   4
  -1  -1  13 117.320 58.6293   4
   1  -1 -13 82.5103 40.4867   2
   1  -1 -12 467.417 62.0043   2
  -1  -1  12 444.766 71.0289   4
  -1  -1  12 468.733 71.1721   2
  -1   1  12 387.662 61.1530   2
   1   1 -12 375.269 59.4066   2
   1  -1 -12 474.877 73.7284   4
  -1   1  12 563.464 83.5912   4
   1   1 -12 347.175 66.9558   4
   1  -1 -11 2112.91 134.301   4
  -1  -1  11 2232.25 141.186   4
   1   1 -11 2180.60 132.733   2
  -1  -1  11 2155.87 131.561   2
   1   1 -11 2144.65 136.386   4
  -1   1  11 2127.89 123.482   2
  -1   1  11 2320.46 142.559   4
   1  -1 -11 2341.94 129.252   2
   1   1 -10-33.7606 41.7816   4
   1  -1 -10 18.8585 43.3219   4
   1  -1 -10 10.2065 24.9175   2
  -1  -1  10 42.9562 34.1807   4
  -1   1  10 6.45849 31.7216   4
  -1   1  10 4.50612 28.2838   2
  -1  -1  10-13.6702 31.1842   2
   1   1 -10 8.20506 25.6318   2
  -1   1   9 144.986 40.2021   2
  -1  -1   9 116.702 40.7003   2
   1   1  -9 148.709 46.9045   4
   1   1  -9 208.336 48.9826   2
   1  -1  -9 133.088 45.1241   4
   1  -1  -9 138.674 38.2349   2
  -1  -1   9 349.001 65.1926   4
  -1   1   9 129.659 48.9587   4
  -1   1   8 4218.57 168.595   4
   1  -1  -8 3803.16 157.060   4
   1  -1  -8 4262.03 144.623   2
  -1  -1   8 4775.50 171.400   4
   1   1  -8 4329.88 158.457   2
   1   1  -8 4188.38 165.307   4
  -1  -1   8 4048.41 155.894   2
  -1   1   8 4037.61 142.743   2
   1  -1  -7 40.0569 24.6207   2
   1  -1  -7-7.98149 29.3700   4
  -1  -1   7 61.1330 31.8805   4
   1   1  -7 70.0214 30.9035   2
  -1   1   7 32.5870 32.0835   4
  -1  -1   7 10.3241 25.8426   2
   1   1  -7 38.3278 38.7046   4
  -1   1   7 21.9039 25.0747   2
  -1  -1   6 1696.46 94.0194   4
  -1   1   6 1787.93 96.4498   4
   1   1  -6 1618.91 87.6521   2
  -1  -1   6 1709.49 90.2444   2
   1  -1  -6 1805.47 94.2373   4
   1   1  -6 1703.40 91.6592   4
   1  -1  -6 1686.11 80.7705   2
  -1   1   6 1697.34 82.5143   2
  -1   1   5 3713.31 126.397   4
   1   1  -5 3136.09 118.885   4
  -1   1   5 3534.27 107.195   2
   1  -1  -5 3501.02 106.120   2
  -1  -1   5 3466.24 117.704   2
   1   1  -5 3434.09 117.171   2
  -1  -1   5 3338.72 118.991   4
   1  -1  -5 3641.37 124.027   4
   1   1  -4 564.723 48.2346   4
  -1  -1   4 505.820 45.1471   4
  -1   1   4 518.326 44.8509   4
  -1  -1   4 554.861 45.5845   2
   1  -1  -4 460.746 43.0563   4
   1   1  -4 562.728 45.6429   2
   1  -1  -4 496.935 32.0595   1
  -1   1   4 509.773 38.9956   2
   1  -1  -4 488.710 37.4038   2
  -1   1  -3 45814.5 363.517   2
  -1   1  -3 44954.3 362.878   5
   1   1   3 47382.9 370.772   5
   1  -1   3 45202.7 361.526   2
   1  -1   4 3991.81 117.428   2
   1   1   4 4376.62 93.3124   4
  -1  -1  -4 4164.45 107.325   2
  -1   1  -4 3948.94 118.117   2
  -1  -1  -4 4129.91 121.903   5
   1  -1   4 3885.27 103.014   4
   1   1   4 3986.08 104.515   2
  -1   1  -4 3666.60 98.5464   4
  -1  -1  -4 3755.02 86.8942   4
   1   1   5 8726.68 167.662   2
   1   1   5 8900.48 154.134   4
   1  -1   5 8539.16 184.471   2
  -1  -1  -5 8434.61 148.274   4
  -1   1  -5 8923.20 190.596   2
   1  -1   5 8649.55 165.999   4
  -1   1  -5 8670.93 165.756   4
  -1  -1  -5 8850.80 169.779   2
   1  -1   6 15936.9 269.755   2
   1   1   6 15835.9 245.954   2
  -1   1  -6 15677.9 270.164   2
   1   1   6 16167.1 231.574   4
  -1  -1  -6 15803.9 228.715   4
  -1   1  -6 15389.0 245.215   4
   1  -1   6 15772.5 243.176   4
  -1  -1  -6 16285.1 250.000   2
   1   1   7 2786.43 111.896   2
  -1  -1  -7 2857.82 114.541   2
  -1   1  -7 2446.74 111.163   4
   1  -1   7 2778.58 112.670   4
   1  -1   7 2823.50 123.345   2
  -1   1  -7 2851.19 124.893   2
  -1  -1  -7 2747.69 107.169   4
   1   1   7 3003.59 112.986   4
   1   1   8 148.145 36.2361   2
   1  -1   8 99.3487 32.8255   2
  -1   1  -8 120.148 37.3649   4
  -1  -1  -8 155.144 34.4104   4
  -1  -1  -8 228.322 42.0441   2
   1  -1   8 131.030 29.2334   4
  -1   1  -8 92.0127 28.7759   2
   1   1   9 401.229 55.3007   2
   1  -1   9 373.393 54.7509   2
   1  -1   9 963.295 91.7630   4
  -1   1  -9 425.665 64.2976   4
  -1   1  -9 345.165 54.7799   2
  -1  -1  -9 340.731 50.5059   2
   1   1   9 443.618 55.1747   4
  -1  -1  -9 298.372 48.4283   4
  -1   1 -10 6453.69 205.318   4
  -1   1 -10 6944.55 223.161   2
   1  -1  10 6746.98 216.141   2
  -1  -1 -10 6757.69 209.058   2
   1   1  10 6839.27 206.246   4
  -1  -1 -10 6015.21 198.008   4
   1  -1  10 6916.00 210.737   4
   1   1  10 6470.24 200.708   2
  -1   1 -11 568.229 73.3423   4
   1   1  11 576.688 70.5236   4
   1   1  11 627.285 72.6773   2
  -1   1 -11 634.905 78.0914   2
  -1  -1 -11 580.693 72.5406   4
   1  -1  11 595.523 72.2609   2
  -1  -1 -11 658.325 73.3306   2
   1  -1  11 660.400 73.9231   4
  -1   1 -12 883.535 92.3634   2
  -1  -1 -12 918.847 84.3011   2
  -1   1 -12 991.338 91.4075   4
   1  -1  12 1012.96 95.2404   2
   1   1  12 944.293 87.8278   2
  -1  -1 -12 1017.94 92.3615   4
   1   1  12 903.891 85.1206   4
  -1   1 -13 16.1983 34.0747   4
  -1  -1 -13 64.5650 40.9483   4
   1  -1  13 9.24691 34.4944   2
  -1   1 -13 61.9592 41.1476   2
   1   1  13 2.83945 34.8382   4
  -1  -1 -13 5.19908 28.5156   2
   1   1  13 26.8984 36.7311   2
   1  -1  13 115.367 46.2315   4
  -1   1 -14 2127.07 147.581   2
   1  -1  14 2170.74 150.946   4
   1  -1  14 2123.25 145.401   2
  -1   1 -14 1691.12 135.588   4
  -1  -1 -14 2137.95 141.108   2
   1   1  14 1853.74 128.262   2
   1   1  14 2024.47 138.401   4
   1  -1  15 100.137 55.7344   4
  -1  -1 -15 108.526 53.4810   2
   1   1  15 139.638 54.0601   4
  -1   1 -15 204.329 71.2890   4
   1  -1  15 108.604 69.2506   2
   1   1  15 98.1564 49.7993   2
  -1   1 -16 24153.6 512.280   4
   1   1  16 24269.5 491.658   2
   1  -1  16 24220.7 516.512   2
  -1  -1 -16 24528.7 504.336   4
  -1  -1 -16 26361.1 520.278   2
   1   1  16 26312.9 529.098   4
   1  -1  17 7518.48 297.447   2
  -1  -1 -17 7528.12 291.357   4
   1   1  17 6971.13 278.358   2
  -1   1 -17 6955.58 296.850   4
  -1   1 -18 18826.0 484.451   4
   1   1  18 18645.8 461.456   2
  -1  -1 -18 18743.0 472.494   4
   1  -1  18 18843.5 484.169   2
  -1  -1 -19 1135.78 131.323   4
   1  -1  19 954.885 124.454   2
   1   1  19 1050.71 130.513   2
  -1   1 -19 1072.86 136.102   4
  -1  -1 -20 250.693 77.3692   4
   1   1  20 278.308 79.5259   2
  -1   1 -20 223.661 72.6427   4
   1  -1  20 339.633 81.9923   2
  -1  -1 -21 1591.35 161.244   4
   1   1  21 1496.89 148.015   2
  -1   1 -21 1463.11 159.539   4
   1  -1  21 1532.08 155.705   2
  -1  -1 -22-17.2819 52.5545   4
   1  -1  22 22.3535 47.3139   2
  -1   1 -22-74.2553 61.3546   4
   1   1  22-38.2240 48.2296   2
  -1   1 -23-41.8397 68.3610   4
   1  -1  23-21.2660 52.4437   2
   1   1  23-36.8313 54.6262   2
  -1  -1 -23 25.8090 43.5995   4
  -1   1 -24 405.700 83.1534   4
   1  -1  24 409.716 88.5112   2
  -1  -1 -24 534.239 104.753   4
   1   1  24 430.255 87.1163   2
  -1   1 -25 123.548 55.7617   4
   1  -1  25 105.901 49.6130   2
   1   1  25 64.8714 45.6293   2
  -1  -1 -25 142.231 54.4772   4
  -1  -1 -26 604.770 132.051   4
   1   1  26 447.992 92.5773   2
  -1   1 -26 416.768 86.2716   4
   1  -1  26 595.180 107.334   2
  -1  -1 -27-51.7400 72.8085   4
   1   1  27 25.2254 49.9715   2
  -1   1 -27-217.881 104.592   4
   1  -1  27-58.4803 70.7491   2
   1  -1  28 111.184 70.6671   2
  -1   1 -28-85.9685 103.044   4
  -1  -1 -28 28.8169 67.9830   4
   1   1  28 55.0143 54.1085   2
  -1   1 -29-71.8328 102.963   4
  -1  -1 -29-118.398 96.3523   4
   1   1  29 155.250 72.9359   2
   1  -1  29 41.5241 70.3790   2
   1  -1  30-26.3353 76.5023   2
   1   1  30 32.5744 51.2755   2
  -1   1 -30-33.7964 82.5359   4
  -1  -1 -30-75.8381 96.0724   4
   1  -1  31 668.390 130.221   2
  -1   1 -31 597.240 129.732   4
   1   1  31 581.960 121.311   2
  -1  -1 -31 626.230 115.882   4
   1   1  32 796.438 140.070   2
  -1  -1 -32 423.655 97.3900   4
  -1   1 -32 537.343 118.871   4
   1  -1  32 861.253 148.032   2
   1   1  33 5.98848 60.5055   2
   1  -1  33-59.6424 65.6310   2
  -1  -1 -33-4.91541 73.3008   4
  -1   1 -33 112.236 130.617   4
   1   1  34 68.5578 70.3722   2
  -1   1 -34 185.992 94.9757   4
   1  -1  34 124.835 79.1498   2
  -1  -1 -34 319.716 114.122   4
  -1  -1 -34 26.7922 92.8168   5
  -1  -1 -35 386.631 137.618   5
   1   1  35 378.765 109.711   2
  -1  -1 -35 466.542 135.309   4
  -1   1 -35 540.841 148.121   4
   1  -1  35 168.448 86.0912   2
  -1   1 -36 904.979 197.342   5
  -1  -1 -36 746.146 167.512   4
   1  -1  36 541.264 136.327   2
   1   1  36 542.113 128.863   2
  -1  -1 -36 774.446 187.403   5
  -1   1 -36 907.514 187.776   4
  -1  -1 -37 137.894 96.1426   5
  -1  -1 -37 370.370 139.729   4
   1  -1  37 107.821 81.2989   2
  -1   1 -37 415.055 155.941   4
   1   1  37 43.6247 69.5536   2
   1  -1  38 993.786 183.186   2
  -1  -1 -38 1095.39 199.340   4
  -1   1 -38 1193.92 208.485   4
  -1   1 -39 462.451 146.943   4
   1  -1  39 150.155 106.845   2
  -1  -2  40 471.201 145.622   2
   1  -2 -39-35.5436 88.8148   4
   1   2 -39 295.534 143.358   4
  -1  -2  39 263.034 126.030   2
   1   2 -38 20.1286 91.2739   4
  -1  -2  38 201.416 112.447   2
   1  -2 -38-11.0869 90.5885   4
   1  -2 -37 2360.96 281.223   4
  -1  -2  37 2907.99 295.683   2
   1   2 -37 2833.15 316.632   4
  -1  -2  36 9.34163 68.1128   2
  -1   2  36 152.459 90.9898   2
   1   2 -36 272.303 150.393   4
   1  -2 -36 250.787 117.294   4
   1   2 -35 271.500 131.980   4
  -1  -2  35 178.026 94.4526   2
  -1   2  35 175.588 82.8904   2
   1  -2 -35 232.358 115.226   4
  -1   2  34 140.984 78.1897   2
   1   2 -34 67.6689 81.9906   4
  -1  -2  34 221.426 103.054   2
   1  -2 -34 166.865 94.1807   4
  -1  -2  33-76.7537 84.8535   2
  -1   2  33 112.162 88.8721   2
   1   2 -33-33.3210 85.1200   4
   1  -2 -33 62.6072 75.3846   4
  -1  -2  32 1104.87 174.560   2
   1   2 -32 1227.45 189.415   4
  -1   2  32 1356.44 183.384   2
   1  -2 -32 1522.88 208.705   4
   1   2 -31 1666.76 219.175   4
  -1   2  31 1740.85 198.872   2
   1  -2 -31 1859.37 227.309   4
  -1  -2  31 1599.63 200.972   2
   1   2 -30-27.7524 76.1045   4
   1  -2 -30-58.4398 73.7698   4
  -1  -2  30 37.9358 56.4680   2
  -1   2  30 125.624 82.7876   2
   1  -2 -29 190.102 90.5506   4
  -1  -2  29 136.494 76.5368   2
   1   2 -29-48.1044 79.5080   4
  -1   2  29 73.6164 63.2385   2
   1  -2 -28 390.260 109.459   4
  -1   2  28 265.379 84.4053   2
   1   2 -28 122.158 70.6552   4
  -1  -2  28 186.719 72.5790   2
   1  -2 -27 509.199 119.734   4
  -1   2  27 394.889 92.7734   2
  -1  -2  27 362.407 97.4147   2
   1   2 -27 340.551 91.5507   4
   1  -2 -26 3049.25 252.639   4
  -1   2  26 2486.37 210.423   2
   1   2 -26 2267.29 224.628   4
  -1  -2  26 2287.03 215.968   2
   1   2 -25-11.5880 69.3563   4
   1  -2 -25 208.934 92.6421   4
  -1  -2  25 106.182 78.2854   2
  -1   2  25 128.762 63.8294   2
  -1   2  24 615.121 102.669   2
  -1  -2  24 688.011 116.224   2
   1   2 -24 570.805 115.359   4
   1  -2 -24 801.259 130.891   4
  -1  -2  23 129.737 53.6413   2
  -1   2  23 195.945 65.2957   2
   1  -2 -23 273.716 80.9269   4
   1   2 -23 182.539 78.5584   4
   1  -2 -22 756.832 122.372   4
   1   2 -22 763.534 117.305   4
  -1   2  22 838.328 113.180   2
  -1  -2  22 617.460 103.888   2
  -1  -2  21 95.4322 54.9184   2
   1   2 -21 56.1547 58.7986   4
   1  -2 -21 200.974 75.5579   4
  -1   2  21 62.6097 52.4891   2
  -1   2  20 2810.21 190.273   2
  -1  -2  20 2698.15 203.252   2
   1   2 -20 2715.48 212.435   4
   1  -2 -20 2610.20 203.955   4
  -1  -2  19 1361.57 144.910   2
   1  -2 -19 1065.69 140.533   4
   1   2 -19 1096.74 136.522   4
  -1   2  19 1193.62 128.369   2
   1  -2 -18 265.440 93.9808   4
  -1  -2  18 387.004 92.3188   2
   1   2 -18 280.008 82.1432   4
  -1   2  18 413.521 83.2537   2
   1  -2 -17 12511.0 358.405   2
  -1  -2  17 11650.1 376.699   2
   1   2 -17 11575.3 386.914   4
   1  -2 -17 11694.4 382.501   4
  -1   2  17 11754.0 348.992   2
   1   2 -16 948.797 198.739   4
  -1   2  16 1087.48 111.859   2
  -1  -2  16 862.669 115.073   2
   1  -2 -16 975.356 116.760   4
   1  -2 -16 983.738 103.583   2
   1   2 -15 242.784 81.5137   4
   1  -2 -15 253.480 67.7381   2
  -1  -2  15 255.528 81.5890   2
   1  -2 -15 474.041 104.333   4
  -1   2  15 150.528 65.4879   2
   1   2 -14 6240.40 251.985   2
   1   2 -14 5712.45 252.657   4
   1  -2 -14 6178.61 252.053   4
  -1  -2  14 5630.51 239.248   2
  -1   2  14 5802.11 223.413   2
   1  -2 -14 6086.26 225.434   2
  -1   2  14 6631.37 268.085   4
   1   2 -13 335.117 70.6846   4
  -1   2  13 443.035 66.5869   2
   1  -2 -13 349.545 58.3726   2
   1   2 -13 384.617 67.8360   2
  -1  -2  13 371.669 70.8055   4
   1  -2 -13 444.239 78.4794   4
  -1  -2  13 380.210 71.2676   2
  -1   2  13 494.868 79.2699   4
  -1  -2  12 43.0008 36.6395   2
  -1   2  12 53.4876 30.4076   2
   1  -2 -12 11.3142 25.3690   2
  -1   2  12-20.3121 41.0908   4
   1   2 -12 84.1789 43.2231   4
   1   2 -12 56.0157 33.0420   2
  -1  -2  12 70.9692 41.5088   4
   1  -2 -12 28.2145 35.6066   4
  -1   2  11 515.697 61.5509   2
  -1  -2  11 569.784 75.1069   2
  -1  -2  11 630.852 79.4394   4
  -1   2  11 533.975 73.5844   4
   1  -2 -11 467.613 68.0703   4
   1  -2 -11 509.045 62.3596   2
   1   2 -11 538.334 78.4733   4
   1   2 -11 607.229 75.7861   2
   1  -2 -10 2167.30 133.929   4
   1   2 -10 2244.34 130.115   2
  -1  -2  10 2215.25 137.631   4
  -1   2  10 2096.71 114.554   2
  -1   2  10 2380.61 138.017   4
   1   2 -10 2345.22 139.499   4
  -1  -2  10 2230.85 131.006   2
   1  -2 -10 2336.09 117.074   2
   1  -2  -9 2655.49 136.635   4
   1   2  -9 2948.68 142.329   2
   1  -2  -9 2866.68 122.111   2
  -1  -2   9 2824.91 146.820   4
  -1  -2   9 2741.98 140.223   2
   1   2  -9 3005.45 144.770   4
  -1   2   9 3145.39 154.776   4
  -1   2   9 2629.43 118.670   2
  -1  -2   8 3412.42 147.218   4
  -1  -2   8 3162.36 145.091   2
  -1   2   8 3671.59 153.383   4
   1  -2  -8 3175.25 145.626   4
   1  -2  -8 3447.59 126.725   2
   1   2  -8 3117.43 142.171   2
  -1   2   8 3221.50 124.540   2
   1   2  -8 3496.61 147.849   4
  -1   2   7 208.335 41.1432   4
   1  -2  -7 277.799 36.6876   2
   1   2  -7 277.358 45.3005   2
  -1   2   7 267.021 38.0793   2
   1  -2  -7 222.582 45.1633   4
  -1  -2   7 209.847 43.1859   4
   1   2  -7 254.402 47.3609   4
  -1  -2   7 258.290 47.6929   2
  -1  -2   6 3647.21 136.155   2
   1   2  -6 3301.64 133.950   4
   1   2  -6 3466.79 131.925   2
  -1   2   6 3738.23 113.885   2
  -1  -2   6 3570.75 134.705   4
   1  -2  -6 3715.95 112.890   2
  -1   2   6 3800.21 141.098   4
   1  -2  -6 3617.59 139.292   4
   1  -2  -5 1022.78 56.0494   1
  -1   2   5 1085.97 71.3451   4
   1  -2  -5 950.509 52.6760   2
   1   2  -5 958.242 66.7271   2
  -1  -2   5 924.678 66.6218   4
   1   2  -5 823.422 67.4956   4
  -1  -2   5 922.140 65.6366   2
   1  -2  -5 1006.13 67.7043   4
  -1   2   5 978.688 53.5980   2
  -1   2   4 75.9032 22.7309   4
   1  -2  -4 90.4180 28.3289   4
  -1  -2   4 89.3191 27.3904   2
   1  -2  -4 98.0693 19.6153   1
   1   2  -4 81.2125 22.2357   2
   1  -2  -4 99.7991 18.7508   2
   1   2  -4 86.1367 26.3023   4
  -1   2   4 79.0220 18.8404   3
  -1   2   4 99.1497 20.6763   1
  -1  -2   4 63.7115 23.2546   4
  -1   2   4 96.5240 18.2491   2
   1  -2  -3 58.3594 15.8929   3
  -1   2   3 43.7296 17.0281   4
  -1  -2   3 52.4277 19.3157   4
  -1   2   3 59.6080 15.4441   2
   1  -2  -3 44.0082 11.3047   2
   1   2  -3 56.0989 19.2559   4
  -1  -2  -3 16722.6 200.503   6
  -1  -2  -3 16503.6 217.367   5
  -1   2  -3 15793.8 226.541   2
   1   2   3 16854.6 219.019   5
   1  -2   3 15308.5 224.289   2
   1  -2   3 16122.9 202.402   4
   1   2   3 17006.9 200.966   6
  -1   2  -4 3628.85 104.760   4
   1   2   4 3550.53 87.2784   4
   1  -2   4 3678.17 107.015   4
  -1  -2  -4 3704.78 87.3082   4
   1   2   4 3779.28 94.5875   2
  -1  -2  -4 3789.55 115.821   5
  -1   2  -4 3716.51 120.315   2
   1  -2   4 3632.44 118.890   2
   1   2   4 3724.62 115.275   5
  -1  -2  -4 3870.67 105.638   6
  -1  -2  -5 8263.00 154.661   2
  -1  -2  -5 7853.23 146.225   4
   1   2   5 8426.11 155.195   2
   1   2   5 8232.94 149.741   4
  -1   2  -5 7981.05 188.594   2
   1  -2   5 7773.64 185.615   2
   1  -2   5 8141.53 172.870   4
  -1   2  -5 7754.64 164.972   4
  -1  -2  -5 8125.94 185.931   5
  -1   2  -6 714.315 60.5721   4
  -1   2  -6 779.238 66.0692   2
   1   2   6 767.441 54.0041   2
   1  -2   6 762.676 66.9938   2
  -1  -2  -6 740.060 51.6249   4
  -1  -2  -6 780.758 53.7338   2
   1   2   6 724.150 52.8876   4
   1  -2   6 690.884 62.5652   4
   1  -2   7 680.385 60.6766   4
   1  -2   7 640.248 64.3487   2
   1   2   7 668.602 54.7105   2
  -1   2  -7 691.379 67.2231   2
  -1   2  -7 584.060 58.6528   4
  -1  -2  -7 743.617 59.6378   2
  -1  -2  -7 657.859 54.7268   4
   1   2   7 658.931 55.3613   4
  -1  -2  -8 35.3110 23.6644   2
   1  -2   8-20.8960 31.1954   2
   1  -2   8 43.4085 27.5439   4
   1   2   8 7.32647 21.6923   2
  -1   2  -8 6.00898 27.0071   4
   1   2   8 28.3801 24.7268   4
  -1   2  -8 72.7479 31.4630   2
  -1  -2  -8 183.778 54.2891   4
   1  -2   9 6686.36 201.110   4
  -1  -2  -9 6546.13 186.363   4
  -1   2  -9 6375.23 198.327   4
  -1   2  -9 6666.65 216.857   2
   1   2   9 6225.39 181.187   2
   1  -2   9 6342.79 210.532   2
  -1  -2  -9 6795.76 189.810   2
   1   2   9 6530.19 190.030   4
   1  -2  10 4594.89 177.897   4
   1   2  10 4717.97 166.190   2
  -1   2 -10 4761.89 181.281   4
  -1  -2 -10 4886.75 172.096   2
   1  -2  10 4672.90 187.674   2
  -1   2 -10 4778.95 191.493   2
   1   2  10 4753.63 173.827   4
  -1  -2 -10 4672.05 168.405   4
   1  -2  11 224.578 57.9578   2
  -1   2 -11 142.891 47.8611   4
  -1   2 -11 237.470 53.2817   2
   1   2  11 259.840 50.3604   2
  -1  -2 -11 271.014 56.5950   4
  -1  -2 -11 265.670 51.8719   2
   1   2  11 176.235 41.8927   4
   1  -2  11 195.580 41.7325   4
   1  -2  12 2382.46 145.514   2
  -1  -2 -12 2366.73 137.995   4
   1   2  12 2266.19 134.384   4
  -1   2 -12 2206.70 143.679   2
  -1   2 -12 2131.37 136.376   4
  -1  -2 -12 2346.58 132.985   2
   1  -2  12 2321.95 136.420   4
   1   2  12 2320.07 130.709   2
  -1   2 -13 443.414 72.1336   2
   1   2  13 408.217 62.3329   2
   1   2  13 434.987 67.5589   4
   1  -2  13 465.180 72.1036   2
   1  -2  13 450.065 72.6845   4
  -1  -2 -13 409.223 65.2068   4
  -1   2 -13 369.147 68.7782   4
  -1  -2 -13 376.932 58.9008   2
  -1  -2 -14 1965.47 129.944   2
   1   2  14 1698.29 122.187   2
  -1  -2 -14 1916.76 135.262   4
  -1   2 -14 1664.24 136.406   4
   1  -2  14 1828.25 138.787   2
  -1   2 -14 2053.83 146.321   2
   1   2  14 1989.86 136.452   4
   1  -2  14 1945.44 138.495   4
   1  -2  15 1806.46 142.518   2
   1  -2  15 2185.69 154.542   4
   1   2  15 1811.53 130.006   2
  -1   2 -15 1580.51 137.150   4
  -1  -2 -15 1751.08 134.043   4
  -1  -2 -15 1928.87 134.880   2
   1   2  15 1829.75 135.561   4
   1   2  16 275.053 68.8595   2
   1  -2  16 419.561 90.7885   2
  -1   2 -16 140.236 49.3159   4
   1   2  16 96.0398 45.2261   4
  -1  -2 -16 128.552 52.1843   4
  -1  -2 -16 191.532 54.9307   2
   1   2  17 677.558 91.0163   2
   1  -2  17 745.645 107.532   2
  -1   2 -17 461.247 85.6625   4
  -1  -2 -17 580.642 91.8741   4
  -1  -2 -18 7983.76 312.571   4
   1  -2  18 8542.28 332.019   2
  -1   2 -18 8180.38 326.901   4
   1   2  18 7854.47 296.857   2
  -1   2 -19 217.134 75.2360   4
   1   2  19 99.7006 52.8716   2
   1  -2  19 201.329 84.2525   2
  -1   2 -20 2755.14 210.828   4
  -1  -2 -20 3276.57 214.273   4
   1  -2  20 3027.49 214.464   2
   1   2  20 3068.59 198.530   2
  -1   2 -21 2880.50 213.967   4
   1  -2  21 2780.98 207.601   2
   1   2  21 2667.72 189.296   2
  -1  -2 -21 2839.92 205.091   4
  -1   2 -22 151.120 52.8774   4
   1  -2  22 286.375 73.3759   2
   1   2  22 162.452 62.5143   2
  -1  -2 -22 206.251 72.2884   4
   1   2  23 31.1734 46.1735   2
  -1   2 -23-104.450 77.8496   4
   1  -2  23-21.1661 51.7538   2
  -1  -2 -23 4.51484 47.3303   4
  -1   2 -24-5.20391 71.0331   4
   1   2  24-31.5521 49.6768   2
  -1  -2 -24-46.8057 66.2050   4
   1  -2  24-45.5626 58.1803   2
   1  -2  25 240.049 77.0638   2
  -1   2 -25 32.5618 64.7108   4
   1   2  25 253.243 76.1476   2
  -1  -2 -25 114.056 52.1043   4
   1   2  26-73.2793 63.6780   2
  -1   2 -26-5.94191 75.1385   4
  -1  -2 -26 89.3825 58.5460   4
   1  -2  26 1.60771 50.4797   2
   1  -2  27 68.5961 54.5704   2
   1   2  27 14.9483 45.3292   2
  -1   2 -27-48.7187 75.7910   4
  -1  -2 -27-35.0598 60.1763   4
   1  -2  28 134.722 77.7588   2
  -1  -2 -28 26.0529 70.4128   4
  -1   2 -28 26.2702 73.4468   4
   1   2  28 7.60912 51.8981   2
   1   2  29 847.776 132.395   2
  -1  -2 -29 666.602 124.026   4
   1  -2  29 947.093 146.110   2
  -1   2 -29 739.772 131.160   4
   1  -2  30 700.963 141.105   2
  -1   2 -30 643.864 131.701   4
   1   2  30 793.727 137.239   2
  -1  -2 -30 532.412 116.793   4
  -1  -2 -31-208.195 110.091   4
  -1   2 -31-87.4298 66.4954   4
   1   2  31-59.8086 77.8795   2
   1  -2  31 31.2542 73.4666   2
   1  -2  32 58.9405 68.2942   2
  -1  -2 -32-90.8174 89.5343   4
  -1   2 -32-57.7603 85.1160   4
   1   2  32 109.936 68.8779   2
   1  -2  33-40.4913 64.0225   2
  -1   2 -33-13.6833 67.3057   4
  -1  -2 -33-121.688 104.679   4
   1   2  33-40.9914 70.1977   2
  -1  -2 -34-40.9009 86.3727   4
   1  -2  34 68.8447 76.2761   2
  -1  -2 -34 75.5541 83.1699   5
   1   2  34-47.2084 76.8308   2
  -1   2 -34 154.243 100.461   4
   1   2  35 433.193 113.433   2
  -1   2 -35 844.435 176.900   4
  -1  -2 -35 679.837 169.982   5
  -1  -2 -35 748.322 159.125   4
   1  -2  35 580.598 130.995   2
  -1   2 -36 805.782 175.723   4
  -1  -2 -36 369.302 145.617   5
   1  -2  36 350.759 123.905   2
  -1  -2 -36 482.819 147.798   4
   1   2  36 213.339 94.7124   2
   1  -2  37-47.1556 80.3725   2
  -1  -2 -37-239.419 124.351   5
  -1  -2 -37 45.8109 92.7126   4
   1  -2  38 33.7370 82.9548   2
  -1   2 -38 234.544 150.801   4
  -1   2 -39 357.098 144.275   4
   1  -2  39 228.272 108.577   2
  -1  -3  40 130.095 88.3929   2
   1   3 -39 711.131 179.821   4
   1  -3 -39 317.444 124.565   4
  -1  -3  39 356.385 131.165   2
   1  -3 -38 476.618 173.333   4
   1   3 -38 612.213 185.808   4
  -1  -3  38 690.166 170.740   2
  -1  -3  37 271.576 121.169   2
   1  -3 -37 234.301 161.928   4
   1   3 -37 451.835 208.924   4
  -1  -3  36 447.528 140.256   2
   1  -3 -36 510.262 154.981   4
   1   3 -36 785.507 179.408   4
  -1  -3  35 51.9735 71.9836   2
   1   3 -35-19.6908 79.6212   4
   1  -3 -35 127.007 106.182   4
  -1   3  35 290.163 107.551   2
   1   3 -34 138.755 100.901   4
  -1   3  34 149.624 72.7010   2
   1  -3 -34 125.399 98.6754   4
  -1  -3  34 40.8679 76.9041   2
   1   3 -33 928.209 179.769   4
   1  -3 -33 1112.20 185.444   4
  -1   3  33 1248.60 175.688   2
  -1  -3  33 1307.85 191.992   2
   1   3 -32 117.204 84.3428   4
  -1   3  32 424.430 116.208   2
   1  -3 -32 314.031 112.356   4
  -1  -3  32 496.353 129.437   2
  -1   3  31 707.371 126.912   2
   1   3 -31 746.245 152.126   4
   1  -3 -31 1023.40 178.954   4
  -1  -3  31 742.999 152.135   2
  -1   3  30 60.8255 55.3431   2
   1   3 -30 21.5783 80.6285   4
   1  -3 -30 92.5732 69.3619   4
  -1  -3  30 171.593 81.9000   2
  -1  -3  29-2.32136 57.5822   2
  -1   3  29 62.7824 58.1045   2
   1   3 -29-149.182 116.818   4
   1  -3 -29 20.1289 66.0770   4
  -1  -3  28-43.3454 68.8735   2
   1   3 -28-100.467 95.7596   4
   1  -3 -28 77.8312 77.4877   4
  -1   3  28-45.0380 61.0892   2
   1  -3 -27 373.457 110.260   4
   1   3 -27 17.8994 78.7446   4
  -1   3  27 294.129 84.7247   2
  -1  -3  27 226.998 80.4767   2
   1  -3 -26 727.559 134.875   4
  -1  -3  26 665.864 123.807   2
  -1   3  26 671.763 114.215   2
   1   3 -26 520.168 116.333   4
   1   3 -25-20.1214 66.9946   4
   1  -3 -25 135.915 76.2014   4
  -1   3  25 65.0931 53.9695   2
  -1  -3  25 66.9693 70.0179   2
   1   3 -24 1415.86 167.637   4
  -1  -3  24 1978.25 193.213   2
   1  -3 -24 1805.21 188.196   4
  -1   3  24 1700.34 162.867   2
   1  -3 -23 62.3837 61.7831   4
  -1   3  23 45.2133 56.2405   2
  -1  -3  23 109.584 66.2068   2
   1   3 -23-49.4003 70.6523   4
   1   3 -22 97.4477 64.7555   4
  -1   3  22 145.562 51.4811   2
  -1  -3  22 167.888 64.0040   2
   1  -3 -22 143.696 67.5825   4
  -1   3  21 198.699 59.6053   2
   1   3 -21 337.506 86.6481   4
   1  -3 -21 252.580 73.8631   4
  -1  -3  21 327.549 78.7915   2
   1   3 -20 1507.19 166.143   4
  -1  -3  20 1800.39 168.374   2
  -1   3  20 1850.05 154.082   2
   1  -3 -20 1666.20 163.742   4
  -1  -3  19 7058.36 320.091   2
   1  -3 -19 7013.42 315.315   4
   1   3 -19 7122.21 330.861   4
  -1   3  19 7162.04 286.037   2
   1  -3 -18 1210.25 146.615   4
  -1  -3  18 1400.43 150.571   2
   1   3 -18 1055.91 145.748   4
  -1   3  18 1340.24 134.064   2
   1  -3 -17 11831.8 342.633   2
  -1   3  17 11099.5 334.581   2
  -1  -3  17 10873.1 375.015   2
   1   3 -17 11818.0 397.073   4
   1  -3 -17 11494.9 380.204   4
   1   3 -16 4277.93 242.294   4
   1  -3 -16 4392.26 234.154   4
   1  -3 -16 4350.66 200.093   2
  -1  -3  16 4518.47 236.722   2
  -1   3  16 4551.11 208.653   2
   1  -3 -15 9386.63 323.002   4
  -1   3  15 9588.14 288.213   2
   1   3 -15 9037.86 334.066   4
   1  -3 -15 10400.1 297.134   2
  -1  -3  15 9494.12 328.390   2
   1   3 -14 320.736 77.5282   4
   1  -3 -14 231.958 71.6625   4
  -1  -3  14 381.668 81.8346   2
  -1   3  14 351.796 66.5342   2
   1  -3 -14 310.692 54.6950   2
  -1   3  14 283.638 71.3192   4
   1   3 -13 5879.50 246.839   4
  -1   3  13 5692.04 204.989   2
  -1   3  13 6181.28 251.532   4
   1  -3 -13 5485.58 234.645   4
  -1  -3  13 5819.05 241.578   2
  -1  -3  13 6546.46 256.502   4
   1  -3 -13 6428.21 215.202   2
   1   3 -13 6254.37 248.517   2
   1   3 -12 47.2709 45.1146   2
   1  -3 -12-4.99418 23.9534   2
  -1  -3  12 64.9633 49.9582   2
   1   3 -12 25.4951 42.5989   4
  -1  -3  12 80.5213 55.2154   4
   1  -3 -12-78.9007 52.3920   4
  -1   3  12 9.10248 30.0387   2
  -1   3  12-18.5113 32.6840   4
  -1   3  11 3590.02 177.302   4
   1  -3 -11 3355.58 171.746   4
   1   3 -11 3477.87 176.771   4
  -1   3  11 3363.58 143.802   2
  -1  -3  11 3478.69 178.884   4
   1   3 -11 3735.05 179.810   2
   1  -3 -11 3793.60 151.476   2
  -1  -3  11 3469.50 173.958   2
  -1   3  10 359.828 67.3113   4
  -1   3  10 358.451 49.8687   2
  -1  -3  10 358.817 68.8308   2
   1  -3 -10 470.003 57.1187   2
  -1  -3  10 253.595 53.1276   4
   1   3 -10 269.441 54.0737   2
   1   3 -10 344.365 65.2827   4
   1  -3 -10 272.933 62.7279   4
  -1   3   9 1890.35 121.469   4
   1  -3  -9 1952.73 96.8344   2
   1  -3  -9 1693.79 115.159   4
   1   3  -9 1774.61 122.241   4
   1   3  -9 1953.56 122.178   2
  -1  -3   9 1987.58 125.791   4
  -1   3   9 1813.34 95.3885   2
  -1  -3   9 1924.68 130.651   2
  -1   3   8 29995.9 442.460   4
   1  -3  -8 28396.3 430.755   4
   1   3  -8 28457.2 436.794   4
  -1  -3   8 28768.4 435.593   2
  -1  -3   8 28714.4 444.098   4
  -1   3   8 28872.7 347.734   2
   1  -3  -8 28494.4 341.278   2
   1   3  -8 29138.2 437.105   2
   1  -3  -7 2940.47 103.447   2
  -1   3   7 2910.06 133.658   4
  -1  -3   7 2973.89 138.799   2
   1  -3  -7 2949.64 137.283   4
  -1  -3   7 2916.91 138.017   4
  -1   3   7 2710.85 92.4200   3
   1   3  -7 2771.20 139.070   4
  -1   3   7 2896.45 103.668   2
   1   3  -7 2862.23 133.079   2
  -1   3   6 8361.01 211.886   4
   1  -3  -6 8316.06 180.907   1
   1  -3  -6 7881.74 153.568   2
   1  -3  -6 8026.00 205.916   4
   1   3  -6 7947.05 206.768   2
  -1  -3   6 7738.33 204.666   2
  -1   3   6 7984.66 156.081   2
  -1   3   6 7633.69 147.047   3
   1   3  -6 8035.35 208.081   4
  -1  -3   6 7706.04 205.864   4
   1  -3  -5 495.603 54.1291   4
   1   3  -5 423.347 55.3432   4
   1  -3  -5 501.754 37.4175   2
  -1  -3   5 394.241 53.1575   4
   1  -3  -5 460.681 43.1824   1
  -1  -3   5 488.202 52.7805   2
  -1   3   5 578.798 56.6241   4
  -1   3   5 507.594 38.1901   2
  -1   3   5 524.300 39.0390   3
   1   3  -5 451.434 49.1189   2
   1  -3  -4 2564.32 103.962   4
   1  -3  -4 2342.01 77.7527   3
   1   3  -4 2402.20 101.101   2
  -1   3   4 2550.76 105.261   4
   1  -3  -4 2253.34 70.3234   2
   1   3  -4 2431.65 99.6343   4
  -1   3   4 2382.65 72.3391   2
  -1  -3   4 2298.67 98.0823   4
   1  -3  -4 2347.77 87.9548   1
  -1  -3   4 2255.81 99.4283   2
  -1   3   4 2443.81 78.6709   3
  -1   3   4 2192.60 85.8063   1
   1  -3  -3 10550.2 176.099   1
  -1  -3   3 11034.5 194.302   4
  -1  -3   3 10257.5 192.435   2
  -1   3   3 10585.5 161.418   3
   1  -3  -3 10256.2 159.413   3
   1  -3  -3 10680.5 196.025   4
   1   3  -3 10705.1 190.827   4
   1   3  -3 10757.1 195.837   2
  -1   3   3 10269.9 174.688   1
  -1   3   2 4670.76 108.553   3
  -1  -3   2 4868.90 116.330   4
   1  -3  -2 4728.80 108.657   3
   1   3  -2 4569.04 112.515   4
  -1  -3   2 4651.55 118.838   2
   1   3  -2 4601.33 118.266   2
  -1   3   2 4610.46 111.321   1
  -1  -3  -2 5867.57 118.949   5
  -1   3  -2 5635.70 115.440   5
   1   3   2 5854.69 128.097   6
   1   3   2 5964.00 120.746   5
  -1   3  -2 5750.27 134.390   2
  -1  -3  -2 6237.58 133.022   6
   1  -3   2 5748.26 133.944   2
  -1  -3  -3 2686.17 89.5015   5
   1   3   3 2656.19 92.0072   6
   1  -3   3 2652.81 100.368   2
  -1   3  -3 2649.39 99.9154   2
  -1  -3  -3 2805.63 72.1958   4
   1  -3   3 2463.82 92.7369   4
  -1  -3  -3 2955.55 95.9729   6
   1   3   3 2804.02 91.3724   5
   1  -3   4 8422.63 190.614   2
   1   3   4 8521.02 177.699   6
   1   3   4 8996.06 145.952   4
  -1   3  -4 8678.43 193.443   2
   1  -3   4 8814.62 176.333   4
  -1  -3  -4 8764.07 142.030   4
  -1   3  -4 8206.22 177.381   4
  -1  -3  -4 9114.30 178.868   6
  -1  -3  -4 8467.72 173.652   5
   1   3   4 9310.02 179.906   5
  -1   3  -5 121.684 30.7339   4
   1  -3   5 144.364 35.3759   4
  -1  -3  -5 220.072 30.4655   4
   1   3   5 167.417 24.6018   2
  -1  -3  -5 178.726 36.6537   5
  -1  -3  -5 157.694 32.2249   6
  -1   3  -5 150.047 37.9734   2
   1  -3   5 182.992 36.2305   2
   1   3   5 173.857 28.5709   4
  -1  -3  -6 8409.66 203.576   5
  -1  -3  -6 8724.98 164.266   2
  -1  -3  -6 8396.41 171.870   4
  -1   3  -6 8288.96 194.831   4
   1  -3   6 9100.66 206.277   4
  -1   3  -6 8664.38 219.324   2
   1   3   6 8808.63 175.833   4
   1  -3   6 8366.51 213.435   2
   1   3   6 8272.99 159.278   2
   1   3   7 565.665 50.7905   2
  -1   3  -7 608.646 66.7812   2
   1  -3   7 548.346 64.0386   2
  -1  -3  -7 575.477 49.5694   2
   1   3   7 519.297 50.8141   4
  -1  -3  -7 528.751 50.0624   4
   1  -3   7 553.330 62.5772   4
  -1   3  -7 779.092 73.2892   4
   1  -3   8 747.760 76.7661   2
   1   3   8 861.560 61.8758   2
  -1   3  -8 976.320 85.0738   2
   1  -3   8 777.263 73.5181   4
  -1  -3  -8 756.130 59.9430   4
   1   3   8 864.430 67.0912   4
  -1  -3  -8 863.070 62.6740   2
  -1   3  -8 908.927 97.5673   4
  -1   3  -9 9051.80 261.019   2
   1  -3   9 8737.17 237.928   4
   1  -3   9 8249.40 246.389   2
  -1  -3  -9 8620.49 217.495   4
   1   3   9 8738.41 221.179   4
   1   3   9 8181.05 196.144   2
  -1   3  -9 7940.89 238.705   4
  -1  -3  -9 8855.39 207.360   2
   1   3  10 6033.49 193.716   4
   1  -3  10 5938.46 206.611   4
  -1   3 -10 5642.26 204.089   4
   1   3  10 5682.48 173.835   2
  -1   3 -10 5995.98 219.882   2
  -1  -3 -10 6248.47 183.988   2
   1  -3  10 5566.46 209.796   2
  -1  -3 -10 5929.45 191.280   4
   1   3  11 7415.06 228.367   4
   1  -3  11 6900.11 234.976   4
  -1   3 -11 6531.58 233.452   4
   1  -3  11 6844.91 243.476   2
  -1   3 -11 7326.01 251.775   2
   1   3  11 7073.87 205.639   2
  -1  -3 -11 7346.92 211.393   2
  -1  -3 -11 7435.39 224.968   4
   1  -3  12 1234.27 103.658   4
  -1   3 -12 1488.95 121.054   2
   1  -3  12 1281.41 117.436   2
   1   3  12 1299.38 97.1685   2
   1   3  12 1422.25 107.345   4
  -1   3 -12 1220.10 106.493   4
  -1  -3 -12 1338.76 97.9632   2
  -1  -3 -12 1541.06 116.593   4
   1   3  13 942.750 93.6316   4
  -1  -3 -13 964.868 85.2023   2
  -1  -3 -13 994.799 93.1281   4
   1   3  13 924.620 85.5782   2
  -1   3 -13 1000.26 106.486   2
   1  -3  13 842.943 90.2881   4
   1  -3  13 1068.07 107.274   2
  -1   3 -13 701.436 86.7835   4
  -1   3 -14-12.1228 42.1259   4
  -1  -3 -14 23.2646 28.2765   2
   1   3  14 112.882 53.6690   4
   1  -3  14 38.4346 40.2379   2
   1   3  14 50.1503 30.8540   2
   1  -3  14 86.9685 48.6511   4
  -1  -3 -14 30.9056 41.2094   4
   1   3  15 4426.98 211.641   4
  -1   3 -15 3731.16 204.877   4
   1  -3  15 4075.49 217.687   2
  -1  -3 -15 4337.71 197.557   2
  -1  -3 -15 4340.29 203.189   4
   1   3  15 4224.96 190.818   2
  -1   3 -16 876.973 114.320   4
  -1  -3 -16 1073.90 109.672   2
  -1  -3 -16 1003.21 108.924   4
   1   3  16 1325.97 115.954   2
   1  -3  16 1099.54 124.061   2
   1   3  16 1113.16 109.940   4
   1   3  17 165.745 55.1051   2
   1  -3  17 129.910 54.4337   2
  -1  -3 -17 121.890 41.0031   2
  -1  -3 -17 140.133 49.0615   4
  -1   3 -17 37.9873 54.9844   4
  -1   3 -18 510.013 91.0027   4
   1   3  18 551.746 82.1601   2
  -1  -3 -18 472.394 83.4862   4
   1  -3  18 570.108 100.282   2
  -1   3 -19 1828.08 164.493   4
   1   3  19 1655.47 137.915   2
   1  -3  19 1785.16 163.314   2
  -1  -3 -19 1798.27 156.807   4
  -1   3 -20 2206.86 185.701   4
  -1  -3 -20 2095.83 170.109   4
   1  -3  20 2629.57 203.805   2
   1   3  20 2275.88 169.046   2
   1  -3  21 137.806 65.6086   2
  -1   3 -21 66.9127 52.7879   4
  -1  -3 -21 165.632 83.5363   4
   1   3  21 128.660 54.3132   2
   1   3  22 469.357 85.0263   2
  -1  -3 -22 456.915 104.936   4
   1  -3  22 505.561 103.940   2
  -1   3 -22 378.611 86.3440   4
   1  -3  23 3.85506 54.7117   2
  -1   3 -23 21.4123 60.5099   4
  -1  -3 -23 145.669 66.6692   4
   1   3  23 35.7425 43.8868   2
   1   3  24 100.818 53.6696   2
  -1  -3 -24 98.1667 60.8378   4
   1  -3  24 48.7525 47.1596   2
  -1   3 -24-34.3245 82.4082   4
  -1  -3 -25 62.8847 62.3359   4
   1  -3  25 24.7782 47.5373   2
   1   3  25-31.0296 47.1543   2
  -1  -3 -26 13.3606 58.8317   4
   1   3  26-2.43778 45.3260   2
   1  -3  26 71.1403 70.7758   2
  -1   3 -26 118.342 70.7914   4
  -1   3 -27 1671.62 191.092   4
   1  -3  27 1676.94 190.755   2
   1   3  27 1622.57 170.870   2
  -1  -3 -27 1559.22 175.711   4
   1   3  28 840.607 132.444   2
   1  -3  28 804.445 141.023   2
  -1  -3 -28 692.833 118.310   4
  -1   3 -28 564.170 116.372   4
   1  -3  29 89.1652 76.6941   2
  -1   3 -29 30.5599 63.7494   4
  -1  -3 -29-10.3055 73.9591   4
   1   3  29 53.4658 46.9901   2
   1  -3  30 759.762 142.205   2
  -1   3 -30 889.100 155.781   4
   1   3  30 869.135 142.691   2
  -1  -3 -30 1087.28 155.522   4
  -1  -3 -31-27.3544 71.9476   4
   1  -3  31 7.71925 62.4837   2
  -1   3 -31 133.893 88.6038   4
   1   3  31 46.9727 63.1363   2
   1   3  32 185.410 89.4044   2
  -1   3 -32 295.369 118.461   4
  -1  -3 -32 99.2258 78.9571   4
  -1  -3 -32 122.945 81.9072   5
   1  -3  32 293.185 103.711   2
   1  -3  33 455.750 120.476   2
   1   3  33 513.562 111.386   2
  -1  -3 -33 450.172 110.666   4
  -1   3 -33 658.139 156.345   4
  -1  -3 -33 447.597 130.922   5
   1   3  34 211.072 80.9078   2
  -1  -3 -34 214.326 99.6563   4
   1  -3  34 263.989 112.909   2
  -1   3 -34 585.093 150.601   4
  -1  -3 -34 44.8741 76.5241   5
   1  -3  35-141.607 100.788   2
  -1  -3 -35 10.2572 72.2595   4
  -1  -3 -35-35.5479 92.9357   5
  -1   3 -35 210.694 130.051   4
   1   3  35 16.7573 71.2448   2
  -1  -3 -36 7.04614 70.3723   4
   1  -3  36-200.876 111.494   2
  -1  -3 -36 41.8427 79.4674   5
  -1   3 -36 201.572 134.725   4
   1  -3  37 140.803 91.2156   2
  -1  -3 -37 87.5486 85.4030   5
  -1  -3 -37 176.899 92.5127   4
   1  -3  38 94.0267 91.5329   2
  -1   3 -38 186.424 120.629   4
  -1   3 -39 168.970 124.316   4
   1  -3  39 55.7807 77.1024   2
   1  -3  40 519.911 148.766   2
  -1  -4  41-12.4875 80.0952   2
  -1  -4  40 305.966 136.083   2
   1  -4 -39-4.20594 84.7375   4
  -1  -4  39 232.179 130.228   2
   1   4 -39 431.275 177.794   4
   1  -4 -38 1102.55 198.902   4
  -1  -4  38 914.450 184.331   2
   1   4 -38 1386.92 241.475   4
   1  -4 -37-8.15546 83.0799   4
  -1  -4  37 10.7982 71.2729   2
  -1  -4  36 421.543 129.319   2
   1   4 -36 598.398 166.362   4
   1  -4 -36 700.077 171.479   4
  -1  -4  35-124.101 92.5124   2
   1  -4 -35 98.0705 86.3840   4
   1   4 -35 30.7916 78.5427   4
  -1   4  35 106.362 75.8941   2
   1  -4 -34 428.625 123.920   4
   1   4 -34 543.840 143.879   4
  -1  -4  34 488.016 129.007   2
  -1   4  34 388.209 103.114   2
  -1  -4  33 1.90375 85.9318   2
   1   4 -33 87.4016 100.530   4
  -1   4  33-27.9207 71.5371   2
   1  -4 -32 149.990 87.6698   4
   1   4 -32 28.7781 76.6786   4
  -1  -4  32 55.4244 74.6993   2
  -1   4  32 69.1144 68.2150   2
   1   4 -31 242.751 110.521   4
  -1  -4  31 290.757 103.207   2
   1  -4 -31 406.965 119.425   4
  -1   4  31 332.794 99.8678   2
  -1  -4  30-9.13845 59.2356   2
   1  -4 -30 96.0442 87.6165   4
  -1   4  30 20.5922 55.5456   2
   1   4 -30-115.964 95.1314   4
   1   4 -29-119.720 120.726   4
   1  -4 -29 109.616 98.7395   4
  -1   4  29 17.3780 62.8540   2
  -1  -4  29-79.3584 76.0397   2
   1   4 -28-171.898 111.471   4
  -1  -4  28 55.3176 61.8067   2
  -1  -4  27 628.353 125.937   2
   1   4 -27 297.278 82.1597   4
   1  -4 -27 668.252 133.374   4
  -1   4  27 529.286 102.993   2
   1  -4 -26 100.509 79.9044   4
  -1   4  26 103.689 63.9425   2
  -1  -4  26 7.99023 61.1274   2
   1   4 -26 55.6404 63.9214   4
  -1   4  25 1828.03 171.115   2
   1   4 -25 1730.18 202.138   4
  -1  -4  25 2153.12 214.376   2
   1  -4 -25 2013.32 202.323   4
   1   4 -24 243.805 78.9667   4
  -1   4  24 413.578 87.5326   2
   1  -4 -24 342.422 96.5380   4
  -1  -4  24 345.585 102.532   2
   1  -4 -23 58.1749 61.3768   4
  -1   4  23 79.4996 50.9634   2
   1   4 -23-18.8644 63.6813   4
  -1  -4  23 40.7678 49.2910   2
  -1  -4  22 1210.94 155.871   2
   1   4 -22 1260.09 157.939   4
  -1   4  22 1395.34 141.465   2
   1  -4 -22 1187.91 148.453   4
  -1  -4  21 1092.97 137.766   2
   1  -4 -21 1139.52 138.852   4
  -1   4  21 1092.63 118.882   2
   1   4 -21 824.167 129.681   4
  -1   4  20 27.8533 37.4520   2
   1  -4 -20-31.6552 44.2447   4
  -1  -4  20 1.78182 49.1464   2
   1   4 -20-105.884 70.5918   4
  -1   4  19 835.213 100.522   2
   1  -4 -19 820.014 123.697   4
   1   4 -19 598.365 117.215   4
  -1  -4  19 1002.33 133.220   2
  -1   4  18 3329.52 186.342   2
   1   4 -18 3209.72 218.447   4
  -1  -4  18 3150.14 215.424   2
   1  -4 -18 3483.72 189.336   2
   1  -4 -18 3239.53 211.518   4
  -1   4  17 468.410 72.6569   2
   1  -4 -17 576.362 104.617   4
   1  -4 -17 523.035 75.0660   2
  -1  -4  17 651.612 106.792   2
   1   4 -17 495.352 101.305   4
   1  -4 -16 36.4293 30.5345   2
   1  -4 -16 71.6565 68.7511   4
  -1  -4  16 84.0077 54.3201   2
  -1   4  16 4.21202 29.7848   2
   1   4 -15 312.370 76.3634   4
  -1  -4  15 349.720 78.1399   2
  -1   4  15 330.389 60.4143   2
   1  -4 -15 184.374 62.3414   4
   1  -4 -15 408.915 64.1179   2
  -1   4  14 138.158 39.1220   2
   1  -4 -14 173.692 45.8170   2
   1  -4 -14-37.7463 52.7718   4
  -1  -4  14 109.765 54.9348   2
   1   4 -14-16.1764 61.8599   4
  -1   4  13 956.124 99.9297   4
   1   4 -13 891.914 105.659   4
   1  -4 -13 647.746 84.9770   4
  -1  -4  13 928.896 106.871   2
   1  -4 -13 900.704 82.1661   2
   1   4 -13 977.420 105.902   2
  -1   4  13 884.759 82.8853   2
  -1  -4  12 1728.90 135.114   2
  -1   4  12 1971.58 138.865   4
   1   4 -12 1996.34 140.766   2
  -1   4  12 1713.32 106.094   2
   1  -4 -12 1803.95 108.423   2
   1  -4 -12 1693.58 126.885   4
   1   4 -12 1494.81 133.523   4
  -1  -4  12 1737.01 131.770   4
  -1   4  11 1609.28 98.0294   2
  -1  -4  11 1642.90 128.258   4
  -1  -4  11 1648.93 129.408   2
   1   4 -11 1464.37 126.702   4
   1  -4 -11 1600.41 123.933   4
   1  -4 -11 1674.00 98.0419   2
  -1   4  11 1627.53 123.575   4
   1   4 -11 1806.68 132.138   2
   1  -4 -10 11785.5 309.409   4
  -1   4  10 11666.9 208.084   3
  -1  -4  10 12912.1 324.394   4
  -1  -4  10 11551.7 311.629   2
  -1   4  10 12936.5 325.337   4
  -1   4  10 11822.3 243.636   2
   1  -4 -10 12704.9 247.347   2
   1   4 -10 11016.8 316.866   4
   1   4 -10 12428.0 321.303   2
  -1   4   9 4479.99 139.974   2
  -1  -4   9 4769.62 189.285   4
   1  -4  -9 4537.07 139.163   2
  -1   4   9 4545.84 185.799   4
  -1  -4   9 4573.22 194.046   2
  -1   4   9 4219.16 121.365   3
   1   4  -9 4565.60 187.759   2
   1   4  -9 4175.95 185.445   4
   1  -4  -9 4287.98 178.917   4
   1   4  -8 29469.9 453.539   2
  -1   4   8 29949.0 451.858   4
  -1  -4   8 28976.3 448.197   4
   1  -4  -8 28512.9 393.519   1
   1  -4  -8 28038.0 439.481   4
  -1  -4   8 28048.1 443.648   2
  -1   4   8 27602.0 300.091   3
   1  -4  -8 27505.7 319.533   2
   1   4  -8 29212.5 452.292   4
  -1   4   8 28846.8 328.680   2
   1   4  -7 189.368 45.8019   2
  -1   4   7 232.933 29.8386   2
  -1  -4   7 213.049 47.0086   4
  -1   4   7 251.366 44.3730   4
   1  -4  -7 288.709 35.2454   2
   1  -4  -7 224.534 45.5559   4
   1  -4  -7 245.337 42.0127   1
   1   4  -7 133.795 49.6816   4
  -1  -4   7 313.167 64.2609   2
  -1   4   7 230.365 29.3158   3
  -1  -4   6 2614.85 128.023   4
  -1   4   6 2701.47 88.6359   3
   1  -4  -6 2598.61 89.3959   3
   1   4  -6 2929.15 131.574   2
   1  -4  -6 2825.93 116.766   1
   1  -4  -6 2765.41 126.387   4
   1  -4  -6 2706.93 84.7950   2
  -1   4   6 2934.89 129.241   4
   1   4  -6 2763.17 128.646   4
  -1   4   6 2853.60 87.3341   2
  -1  -4   6 2704.29 128.761   2
  -1  -4   5 4070.94 147.801   2
   1  -4  -5 4192.66 109.109   3
   1   4  -5 4135.08 146.698   2
   1  -4  -5 4060.78 94.3743   2
  -1   4   5 4093.32 130.922   1
   1  -4  -5 4269.57 147.860   4
  -1   4   5 4267.85 151.081   4
   1  -4  -5 4309.85 136.149   1
   1   4  -5 3790.84 147.190   4
  -1   4   5 4046.48 107.045   3
  -1  -4   5 4135.83 149.844   4
  -1   4   5 4129.67 97.4004   2
  -1   4   4 2819.19 106.739   1
   1  -4  -4 2874.18 74.5433   2
   1  -4  -4 3089.62 93.7643   3
   1  -4  -4 2960.51 108.280   1
  -1  -4   4 2829.06 119.326   4
   1   4  -4 2908.62 115.443   2
  -1   4   4 3185.36 94.1495   3
  -1  -4   4 3001.84 118.947   2
   1  -4  -4 2913.65 117.645   4
   1   4  -4 2982.98 115.705   4
   1   4  -3 39.1136 20.7710   2
   1   4  -3 43.8426 24.4243   4
   1  -4  -3 52.5908 16.8791   3
  -1  -4   3 25.9569 20.0850   2
  -1   4   3 71.1797 19.2637   3
  -1   4   3 47.4919 21.4135   1
   1  -4  -3 42.0807 20.0630   1
  -1  -4   3 85.3254 25.1680   4
  -1  -4   2 1636.29 76.7804   2
   1   4  -2 1656.48 76.4271   2
   1  -4  -2 1611.61 69.9220   3
  -1   4   2 1644.88 70.6713   3
  -1   4   2 1453.62 72.0865   1
   1   4  -2 1594.39 73.2696   4
  -1  -4   2 1573.16 74.2985   4
  -1  -4   2 1651.90 60.7931   1
   1   4  -2 1582.23 58.9242   1
   1   4  -1 7472.56 146.208   2
   1  -4  -1 7601.61 151.880   3
   1   4  -1 7236.94 131.773   1
   1   4  -1 7347.61 159.694   6
   1   4  -1 7685.30 134.162   5
  -1  -4   1 7386.09 158.276   6
  -1  -4   1 7817.14 135.021   5
  -1  -4   1 7215.65 146.772   4
  -1   4   1 7389.30 150.780   3
  -1  -4   1 7305.60 133.949   1
  -1  -4   1 7362.36 145.292   2
   1  -4  -1 7327.62 155.373   6
   1   4   0 4851.18 102.011   5
  -1  -4   0 4867.16 115.676   1
   1  -4   0 4775.38 107.898   2
   1  -4   0 4721.28 124.988   3
  -1  -4   0 4700.67 100.525   5
  -1   4   0 4764.96 115.394   6
  -1  -4   0 4942.04 108.311   2
   1  -4   0 4632.61 114.712   6
  -1  -4   0 4647.75 125.543   6
   1   4   0 4854.57 107.119   2
   1   4   0 4763.71 125.708   6
  -1   4  -1 9299.62 125.928   5
  -1  -4  -1 9509.08 177.431   6
  -1  -4  -1 9581.87 137.677   2
   1  -4   1 9217.74 166.398   2
   1   4   1 9712.04 138.880   2
  -1   4  -1 9687.42 151.284   6
   1   4   1 9392.91 176.647   6
  -1  -4  -1 9483.93 144.964   5
   1  -4   1 8992.84 149.851   6
  -1   4  -1 9288.67 165.663   2
   1   4   1 9461.57 144.274   5
  -1  -4  -2 44699.8 336.423   5
   1   4   2 47058.5 343.570   5
  -1   4  -2 47509.3 322.510   6
   1  -4   2 45261.4 396.803   2
  -1   4  -2 47357.2 406.558   2
   1  -4   2 47861.2 328.785   6
  -1  -4  -2 48855.5 412.028   6
   1   4   2 45543.9 402.202   6
   1  -4   3 279.001 28.2549   6
   1   4   3 305.508 33.9192   5
   1   4   3 249.523 35.0379   6
   1  -4   3 250.879 37.6543   2
  -1  -4  -3 275.031 35.9410   6
  -1   4  -3 248.165 26.7860   6
  -1   4  -3 278.354 38.2230   2
  -1  -4  -3 287.144 31.4026   5
  -1  -4  -4 10615.3 194.025   5
   1   4   4 10927.2 195.682   5
   1  -4   4 11164.2 216.932   4
   1  -4   4 10227.4 217.698   2
  -1   4  -4 10404.9 156.918   6
  -1   4  -4 10561.5 223.260   2
  -1  -4  -4 10552.3 172.355   4
  -1  -4  -4 10860.8 212.591   6
   1   4   4 10515.6 210.897   6
  -1  -4  -5 41.8614 20.7116   4
   1  -4   5 64.0856 32.3510   2
   1  -4   5-2.97242 23.5563   4
  -1   4  -5-19.5420 26.9226   2
  -1  -4  -5 64.2926 27.9419   5
  -1   4  -5 5.82193 24.8654   4
   1   4   5 25.3488 12.6858   2
  -1  -4  -5 21.0666 21.2022   6
  -1  -4  -6 7952.11 201.319   6
  -1  -4  -6 7594.66 170.163   4
   1   4   6 7801.58 142.338   2
  -1   4  -6 7065.40 195.571   4
  -1   4  -6 7705.48 214.874   2
   1  -4   6 7282.82 206.971   2
   1   4   6 7653.34 172.774   4
   1  -4   6 7725.89 199.687   4
  -1  -4  -6 7829.06 193.324   5
   1   4   7 9121.18 201.452   4
   1  -4   7 9211.84 230.008   4
  -1   4  -7 8735.22 222.931   4
  -1  -4  -7 8773.76 220.636   5
  -1  -4  -7 8705.95 195.974   4
  -1   4  -7 8665.03 238.068   2
   1  -4   7 8263.82 231.735   2
   1   4   7 8822.72 166.176   2
  -1  -4  -7 9094.87 170.368   2
  -1  -4  -8 4830.25 175.316   5
  -1  -4  -8 5060.35 160.956   4
   1   4   8 5145.26 163.009   4
  -1   4  -8 5157.09 184.341   4
   1  -4   8 4984.13 189.649   2
   1   4   8 5134.39 136.892   2
  -1  -4  -8 5192.30 139.899   2
  -1   4  -8 5448.55 198.643   2
   1  -4   8 4885.86 184.729   4
  -1  -4  -9 27.8800 18.7631   2
   1   4   9 66.7358 28.4299   2
   1  -4   9 2.69431 42.6639   2
  -1   4  -9 59.7373 38.0651   2
   1  -4   9 12.3334 29.7961   4
  -1   4  -9 136.796 56.8877   4
   1   4   9 22.6717 25.7359   4
  -1  -4  -9 2.54071 23.3270   4
   1   4  10 3353.68 128.637   2
   1  -4  10 3073.38 163.575   4
   1  -4  10 3334.67 171.168   2
   1   4  10 3443.70 149.951   4
  -1  -4 -10 3489.11 132.536   2
  -1   4 -10 3116.24 161.046   4
  -1  -4 -10 3361.57 147.890   4
  -1   4 -10 3690.97 178.893   2
   1  -4  11 7573.82 263.473   2
  -1   4 -11 7520.52 249.200   4
   1   4  11 7776.60 235.412   4
   1   4  11 7690.58 204.943   2
  -1  -4 -11 7621.04 246.004   4
   1  -4  11 8041.29 256.368   4
  -1  -4 -11 7884.96 212.327   2
  -1   4 -11 7858.73 269.398   2
  -1  -4 -12 7495.34 241.484   4
   1   4  12 7097.72 210.370   2
  -1   4 -12 7070.78 252.642   4
  -1   4 -12 7633.74 273.736   2
  -1  -4 -12 7729.66 221.617   2
   1  -4  12 7110.53 263.133   2
   1   4  12 7559.23 243.535   4
   1  -4  12 7378.52 256.684   4
  -1  -4 -13 2442.47 146.007   4
  -1   4 -13 1991.32 142.647   4
  -1  -4 -13 2357.13 129.603   2
   1   4  13 2352.01 145.169   4
   1  -4  13 2157.12 153.688   2
   1   4  13 2038.85 119.856   2
   1  -4  13 2209.46 145.940   4
   1  -4  14 1147.52 118.782   2
  -1  -4 -14 1923.05 144.496   4
   1  -4  14 1050.08 107.434   4
  -1   4 -14 1089.43 114.521   4
   1   4  14 1126.78 97.0234   2
   1   4  14 1215.62 111.451   4
  -1  -4 -14 1300.86 102.888   2
   1  -4  15 1105.56 124.965   2
   1   4  15 1153.08 103.102   2
  -1  -4 -15 1251.16 116.045   4
  -1   4 -15 1133.04 119.488   4
  -1  -4 -15 1207.71 104.647   2
   1   4  15 1194.65 112.042   4
  -1  -4 -16 8568.77 295.055   4
   1   4  16 9803.21 322.819   4
   1  -4  16 8625.74 329.367   2
  -1   4 -16 8780.55 326.615   4
   1   4  16 8780.80 277.480   2
  -1  -4 -16 9720.59 295.923   2
  -1  -4 -17 209.314 59.5586   2
   1  -4  17 182.787 66.7418   2
   1   4  17 129.071 58.5177   2
  -1   4 -17 38.6702 60.1207   4
  -1  -4 -17 79.3452 54.6697   4
  -1   4 -18 2178.55 177.898   4
  -1  -4 -18 2163.94 161.032   4
  -1  -4 -18 2519.46 165.466   2
   1   4  18 2360.01 156.042   2
   1  -4  18 2334.88 182.176   2
   1   4  19 1225.47 120.548   2
  -1   4 -19 896.808 128.725   4
   1  -4  19 1003.95 130.733   2
  -1  -4 -19 948.731 113.672   4
  -1  -4 -20 3709.36 227.606   4
   1   4  20 3407.21 203.912   2
  -1   4 -20 3584.29 243.069   4
   1  -4  20 3666.52 240.966   2
   1  -4  21 238.699 84.5999   2
  -1   4 -21 204.327 76.9752   4
  -1  -4 -22 1124.49 136.231   4
  -1   4 -22 988.566 133.902   4
   1  -4  22 980.911 134.383   2
   1   4  22 1017.68 117.808   2
  -1  -4 -23 9.34037 45.6473   4
   1   4  23-60.4584 58.6395   2
   1  -4  23 42.0312 46.0305   2
  -1   4 -23 4.37623 51.4178   4
  -1   4 -24 320.438 82.2642   4
   1  -4  24 206.441 79.0059   2
   1   4  24 331.048 78.1601   2
  -1  -4 -24 492.006 100.406   4
  -1   4 -25 211.432 84.7633   4
   1   4  25 92.6526 55.4174   2
   1  -4  25 161.859 59.5318   2
  -1  -4 -25 208.155 77.6315   4
   1  -4  26 151.288 77.2395   2
  -1   4 -26 150.895 73.5633   4
   1   4  26 43.4832 57.4140   2
  -1  -4 -26 105.873 64.0653   4
  -1   4 -27 580.924 139.521   4
   1  -4  27 482.814 116.819   2
  -1  -4 -27 649.145 123.804   4
   1   4  27 598.911 112.997   2
  -1  -4 -28 627.935 125.504   4
   1  -4  28 516.898 122.360   2
  -1   4 -28 725.347 136.405   4
   1   4  28 712.680 117.190   2
  -1   4 -29 245.437 90.0139   4
   1   4  29 94.1590 50.2706   2
  -1  -4 -29 156.484 71.4098   4
   1  -4  29 123.886 80.4445   2
  -1   4 -30 250.896 94.2215   4
  -1  -4 -30 97.6156 69.7654   4
   1  -4  30 246.293 94.5277   2
   1   4  30 203.871 82.9570   2
   1   4  31-39.8114 63.1889   2
  -1  -4 -31 20.7605 70.7982   5
   1  -4  31 178.268 100.034   2
  -1   4 -31 184.399 110.168   4
  -1  -4 -31-46.7382 87.0181   4
  -1  -4 -32 1877.47 241.652   5
  -1   4 -32 1972.49 243.052   4
  -1  -4 -32 1619.56 216.013   4
   1  -4  32 1682.72 208.371   2
   1   4  32 1946.70 207.426   2
   1   4  33 417.688 107.614   2
   1  -4  33 553.539 135.745   2
  -1   4 -33 576.575 146.697   4
  -1  -4 -33 475.527 135.665   4
  -1  -4 -33 338.030 124.339   5
  -1  -4 -34 138.172 127.170   4
  -1   4 -34 296.417 136.636   4
  -1  -4 -34 193.483 137.488   5
   1  -4  34 183.168 106.252   2
   1   4  34 127.933 76.4292   2
  -1  -4 -35 972.710 175.918   4
   1  -4  35 967.445 179.169   2
  -1  -4 -35 1196.00 203.785   5
  -1   4 -35 1325.11 203.082   4
  -1  -4 -36-86.2024 87.1570   5
  -1  -4 -36-191.725 126.133   4
   1  -4  36-44.4085 87.7298   2
  -1   4 -36 113.795 98.5424   4
  -1   4 -37 348.792 149.811   4
   1  -4  37-111.848 93.5063   2
  -1  -4 -37 318.280 125.637   5
  -1  -4 -37 24.0370 87.7075   4
  -1   4 -38 434.110 145.387   4
   1  -4  38 100.083 90.0879   2
   1  -4  39-34.1186 78.4095   2
  -1   4 -39 310.130 142.088   4
   1  -4  40-20.2540 76.4767   2
  -1  -5  40-114.520 112.518   2
  -1  -5  39-72.4792 103.000   2
   1  -5 -39-16.0883 85.7368   4
  -1  -5  38-41.5887 76.9427   2
   1  -5 -38 6.90711 91.9615   4
  -1  -5  37 209.674 101.729   2
   1   5 -37 549.199 182.083   4
   1  -5 -37 277.719 117.238   4
   1   5 -36 1077.14 215.040   4
   1  -5 -36 1178.29 208.004   4
  -1  -5  36 944.650 182.605   2
   1   5 -35 197.732 109.657   4
   1  -5 -35 129.222 97.0083   4
  -1  -5  35 61.8299 87.6404   2
  -1   5  34 28.2502 68.1457   2
  -1  -5  34 269.357 124.205   2
   1  -5 -34 28.2451 100.274   4
   1   5 -34 169.996 126.104   4
  -1  -5  33-23.9000 66.8204   2
  -1   5  33-31.7548 81.9435   2
   1  -5 -33 142.689 125.185   4
   1   5 -33 68.7720 80.1546   4
   1   5 -32 1904.74 238.525   4
  -1   5  32 1915.18 204.743   2
  -1  -5  32 1974.14 239.961   2
   1  -5 -32 2014.30 240.133   4
   1  -5 -31 136.674 95.3036   4
  -1  -5  31 84.4592 94.6193   2
  -1   5  31 211.318 94.6383   2
   1   5 -31 38.4510 87.1601   4
   1  -5 -30 484.178 138.974   4
  -1  -5  30 343.616 111.927   2
  -1   5  29-4.96252 48.9705   2
   1   5 -29 7.77669 86.3858   4
  -1  -5  29 8.72131 63.8508   2
   1   5 -28 77.6249 63.9498   4
  -1   5  28 113.404 53.7730   2
  -1  -5  28 103.314 67.2306   2
   1  -5 -28 177.662 84.7800   4
  -1   5  27 301.530 53.3533   3
  -1   5  27 277.499 70.0320   2
   1   5 -27 91.8479 73.7710   4
   1  -5 -27 312.948 107.218   4
  -1  -5  27 311.315 93.6960   2
   1  -5 -26 1354.62 170.169   4
  -1   5  26 1209.50 140.901   2
  -1   5  26 1277.20 100.820   3
  -1  -5  26 1085.77 160.899   2
   1   5 -26 1011.40 150.406   4
   1  -5 -25 244.113 89.1470   4
  -1   5  25 59.3508 36.8258   3
  -1   5  25 8.88579 52.9645   2
  -1  -5  25 26.4655 63.7772   2
   1   5 -25 27.2272 58.5025   4
  -1   5  24 614.992 99.8823   2
  -1  -5  24 698.006 122.309   2
   1  -5 -24 584.117 116.171   4
  -1   5  24 634.194 74.2015   3
   1   5 -24 619.761 123.005   4
  -1  -5  23 2281.59 208.602   2
   1  -5 -23 2186.96 201.679   4
   1   5 -23 2091.57 209.039   4
  -1   5  23 2225.98 175.824   2
  -1   5  22 3507.20 211.482   2
   1   5 -22 3586.71 256.931   4
   1  -5 -22 3707.90 252.479   4
  -1  -5  22 3407.92 248.871   2
  -1   5  21 64.3477 47.3949   2
   1  -5 -21 196.299 80.3207   4
   1   5 -21 8.93970 55.7776   4
  -1  -5  21 14.2804 53.9558   2
   1   5 -20 824.670 120.359   4
   1  -5 -20 1024.59 131.300   4
  -1   5  20 942.890 108.087   2
  -1  -5  20 1038.56 134.935   2
   1   5 -19 1043.54 128.995   4
  -1  -5  19 1206.27 142.450   2
   1  -5 -19 1340.59 145.320   4
  -1   5  19 1285.74 119.370   2
   1  -5 -19 1280.68 116.274   2
  -1  -5  18 3.67208 45.8642   2
   1  -5 -18 0.42162 31.7740   2
   1   5 -18-57.5824 65.1109   4
   1  -5 -18 126.864 62.2767   4
  -1   5  18 41.8773 39.5259   2
   1  -5 -17 1454.03 145.304   4
  -1   5  17 1645.78 95.8814   3
   1   5 -17 1400.76 146.080   4
   1  -5 -17 1551.43 116.684   2
  -1   5  17 1684.89 126.166   2
  -1  -5  17 1771.08 156.457   2
   1  -5 -16 249.542 53.0839   2
   1  -5 -16 181.311 56.5096   4
  -1   5  16 273.623 41.3813   3
  -1   5  16 257.516 53.2168   2
  -1  -5  16 298.303 75.2565   2
   1   5 -16 60.2484 51.7645   4
  -1  -5  15 2391.29 175.800   2
  -1   5  15 2342.12 107.801   3
   1  -5 -15 2179.73 158.916   4
   1  -5 -15 2384.47 135.175   2
  -1   5  15 2232.66 133.090   2
   1   5 -15 1986.85 164.488   4
   1  -5 -14 3259.79 150.100   2
   1   5 -14 2926.76 189.814   4
  -1   5  14 3104.86 150.280   2
  -1  -5  14 3079.03 191.980   2
   1  -5 -14 2993.28 181.002   4
  -1   5  14 2951.63 116.578   3
   1   5 -13 197.103 59.9395   4
  -1   5  13 182.895 43.2592   2
   1  -5 -13 93.8623 45.4151   4
  -1   5  13 116.441 42.5451   4
  -1  -5  13 237.406 69.8375   2
  -1   5  13 125.690 28.5087   3
   1  -5 -13 194.387 40.2995   2
  -1  -5  12 2253.39 152.254   4
  -1   5  12 2159.90 114.244   2
   1   5 -12 2314.59 155.903   2
   1   5 -12 1955.67 146.898   4
   1  -5 -12 2246.81 115.494   2
   1  -5 -12 2353.79 152.884   4
  -1   5  12 2512.78 158.128   4
  -1   5  12 2144.87 94.7824   3
  -1  -5  12 2231.77 154.986   2
   1  -5 -11 2797.62 163.875   4
  -1  -5  11 2822.16 167.496   2
   1   5 -11 2516.73 158.873   4
   1   5 -11 2718.47 161.502   2
   1  -5 -11 2744.69 120.774   2
  -1   5  11 2835.59 161.422   4
  -1  -5  11 2982.47 166.835   4
  -1   5  11 2566.43 100.009   3
  -1   5  11 2721.23 121.571   2
  -1  -5  10 6471.19 235.267   4
   1  -5 -10 6096.12 166.640   2
  -1   5  10 5727.39 144.029   3
   1  -5 -10 6085.51 230.000   4
  -1   5  10 6041.22 167.210   2
  -1   5  10 6217.35 229.912   4
  -1  -5  10 5969.69 233.374   2
   1   5 -10 5326.52 226.093   4
   1   5 -10 6220.39 234.304   2
  -1  -5   9 2208.36 133.639   4
   1   5  -9 1984.70 137.493   4
   1  -5  -9 2140.75 92.1391   2
  -1   5   9 1943.53 82.3462   3
  -1  -5   9 2167.37 137.438   2
   1   5  -9 2378.27 141.733   2
   1  -5  -9 1940.77 126.622   4
  -1   5   9 2122.44 130.863   4
   1  -5  -9 2241.72 121.868   1
  -1   5   9 2078.29 92.5813   2
   1  -5  -8 1445.45 108.202   4
  -1   5   8 1645.02 111.740   4
  -1  -5   8 1584.22 122.423   2
  -1   5   8 1492.38 71.7077   2
   1  -5  -8 1642.22 75.8777   2
   1  -5  -8 1704.29 102.208   1
  -1   5   8 1395.03 69.5380   3
  -1  -5   8 1443.71 111.232   4
   1   5  -8 1516.49 108.587   2
   1   5  -8 1504.55 117.233   4
   1  -5  -7 510.462 63.8290   4
   1  -5  -7 601.875 61.5109   1
  -1  -5   7 589.912 69.4548   2
   1   5  -7 508.461 68.6546   4
   1  -5  -7 552.993 45.3997   3
   1  -5  -7 553.306 40.4691   2
  -1   5   7 531.017 42.7353   3
  -1   5   7 551.445 42.8246   2
   1   5  -7 532.735 65.2892   2
  -1   5   7 493.700 61.9579   4
  -1  -5   7 524.930 74.4409   4
  -1  -5   6 12831.5 279.982   4
   1  -5  -6 11857.4 165.470   2
   1  -5  -6 12087.1 269.637   4
   1   5  -6 11891.5 270.170   4
  -1   5   6 13177.7 282.080   4
   1   5  -6 12593.9 277.383   2
   1  -5  -6 12406.1 254.659   1
   1  -5  -6 12278.7 195.041   3
  -1  -5   6 11565.2 268.755   2
  -1   5   6 12089.0 193.341   3
  -1   5   6 12505.5 171.653   2
   1  -5  -5 12823.3 156.807   2
   1  -5  -5 13086.8 268.982   4
   1  -5  -5 12664.7 200.466   3
   1   5  -5 12767.8 264.653   4
   1  -5  -5 13412.0 258.004   1
  -1   5   5 13127.1 202.173   3
  -1  -5   5 12911.6 273.533   4
   1   5  -5 12921.1 268.154   2
  -1   5   5 12340.8 245.879   1
  -1  -5   5 12895.7 269.848   2
   1  -5  -4 16.0036 14.7994   3
  -1  -5   4 6.64224 21.7543   4
  -1  -5   4 5.29440 27.1681   2
   1   5  -4 2.53778 25.8425   4
   1  -5  -4 49.9277 25.8393   1
  -1   5   4 20.4106 25.7756   1
[truncated: 4,517,303 more chars]
